# Supplementary material for: Comparative Transcriptomics of the Bovine Apicomplexan Parasite Theileria parva Developmental Stages Reveals Massive Gene Expression Variation and Potential Vaccine Antigens
Source: Front Vet Sci. 2020 Jun 9;7:287. doi: 10.3389/fvets.2020.00287 (PMC7296165; doi:10.3389/fvets.2020.00287)
Supplement: Supplementary Data File 1 — Transcript abundance of each sample replicate. [file Data_Sheet_1.xlsx]

## Sheet: Average_TPM_counts
target_id	Schizont	Piroplasm
XM_757577.1	9.05407	0
XM_757578.1	41.6563	0
XM_757579.1	714.149	4.76038
XM_757580.1	4.82006	0
XM_757581.1	159.25	0
XM_757582.1	511.219	3.375
XM_757583.1	12.1192	2.51475
XM_757584.1	689.01	0.840037
XM_757585.1	3.72235	0
XM_757586.1	2.17349	0
XM_757587.1	130.438	0
XM_757588.1	92.8379	0
XM_757589.1	654.822	5.74865
XM_757590.1	1.98113	0
XM_757591.1	409.358	0
XM_757592.1	4.2848	0
XM_757593.1	1362.25	10.3422
XM_757594.1	9.44259	0
XM_757595.1	1859.13	10.4941
XM_757596.1	1714.19	1.93519
XM_757597.1	12.9515	0
XM_757598.1	566.894	1.1174
XM_757599.1	420.298	0.958118
XM_757600.1	519.551	3.75843
XM_757601.1	57.343	0
XM_757602.1	2.45511	0
XM_757603.1	1.6081	0
XM_757604.1	418.36	1.43575
XM_757605.1	586.109	1.30904
XM_757606.1	16.9617	0
XM_757607.1	38.3908	0
XM_757608.1	977.36	2.42775
XM_757609.1	14.1512	0
XM_757610.1	991.995	1.55657
XM_757611.1	1496.11	0.322376
XM_757612.1	30.0287	0
XM_757613.1	2060.2	0.645562
XM_757614.1	212.139	0
XM_757615.1	1377.33	12.7239
XM_757616.1	1271.26	1.55657
XM_757617.1	276.815	0
XM_757618.1	432.724	2.35342
XM_757619.1	89.5428	0
XM_757620.1	244.703	0
XM_757621.1	3.41304	19.8827
XM_757622.1	1.23572	75.9856
XM_757623.1	5.78139	174.196
XM_757624.1	0.511612	22.7514
XM_757625.1	0.26067	0.926136
XM_757626.1	1.11235	65.676
XM_757627.1	0	924.135
XM_757628.1	0.659629	156.375
XM_757629.1	2.0869	75.4973
XM_757630.1	2.70699	53.5799
XM_757631.1	3.41304	19.8827
XM_757632.1	1.32306	108.779
XM_757633.1	0.259823	71.6888
XM_757634.1	0.887376	63.0453
XM_757635.1	0.720687	6.00083
XM_757636.1	1.11235	65.676
XM_757637.1	0.26067	0.926136
XM_757638.1	28.743	93.9273
XM_757639.1	28.8227	12.2285
XM_757640.1	5.27778	1.0248
XM_757641.1	0.732398	34.5407
XM_757642.1	0.656025	8.24903
XM_757643.1	1.31059	46.3045
XM_757644.1	0.468605	117.28
XM_757645.1	1.41338	23.5998
XM_757646.1	0.379959	47.3396
XM_757647.1	1.23	41.1642
XM_757648.1	15.4508	67.2324
XM_757649.1	222.156	303.054
XM_757650.1	125.386	74.5046
XM_757651.1	177.234	167.879
XM_757652.1	186.193	76.1527
XM_757653.1	287.951	687.582
XM_757654.1	27.2363	110.722
XM_757655.1	192.712	158.761
XM_757656.1	99.5938	37.3913
XM_757657.1	74.1036	49.0941
XM_757658.1	308.871	160.541
XM_757659.1	221.047	126.745
XM_757660.1	192.323	144.989
XM_757661.1	489.928	141.996
XM_757662.1	292.266	468.969
XM_757663.1	20.6182	12.4936
XM_757664.1	11.1119	20.626
XM_757665.1	17.0927	21.563
XM_757666.1	0.848006	14.4099
XM_757667.1	64.5264	211.839
XM_757668.1	1.61987	32.8231
XM_757669.1	36.5517	33.5971
XM_757670.1	574.132	843.053
XM_757671.1	184.327	91.7163
XM_757672.1	34.7173	82.7087
XM_757673.1	246.174	274.809
XM_757674.1	260.743	811.864
XM_757675.1	325.469	184.614
XM_757676.1	261.612	226.657
XM_757677.1	322.139	549.52
XM_757678.1	42.3801	42.1716
XM_757679.1	352.134	234.499
XM_757680.1	41.0395	98.8612
XM_757681.1	757.141	669.841
XM_757682.1	274.714	173.295
XM_757683.1	83.4272	45.2215
XM_757684.1	338.226	233.021
XM_757685.1	276.001	160.009
XM_757686.1	1446.46	967.023
XM_757687.1	114.008	149.12
XM_757688.1	169.797	100.779
XM_757689.1	369.222	18.3478
XM_757690.1	57.8729	85.6012
XM_757691.1	0.278561	0.660843
XM_757692.1	286.038	668.584
XM_757693.1	219.056	122.179
XM_757694.1	82.7798	67.906
XM_757695.1	10.5402	231.983
XM_757696.1	252.857	117.351
XM_757697.1	196.29	155.191
XM_757698.1	111.639	106.092
XM_757699.1	172.061	3.73038
XM_757700.1	131.911	93.5327
XM_757701.1	279.318	922.411
XM_757702.1	23.6255	5.84061
XM_757703.1	216.956	85.5027
XM_757704.1	215.644	131.85
XM_757705.1	30.1673	40.7016
XM_757706.1	92.2102	118.559
XM_757707.1	0.997857	4.01836
XM_757708.1	157.472	101.469
XM_757709.1	34.4684	34.8845
XM_757710.1	273.823	456.692
XM_757711.1	19.4667	33.3183
XM_757712.1	25.2337	84.9097
XM_757713.1	109.664	336.539
XM_757714.1	637.619	966.42
XM_757715.1	83.0338	153.811
XM_757716.1	172.863	675.261
XM_757717.1	345.61	1194.52
XM_757718.1	125.292	27.1274
XM_757719.1	99.6833	86.4812
XM_757720.1	34.4757	143.71
XM_757721.1	178.766	98.1228
XM_757722.1	478.351	520.299
XM_757723.1	103.521	200.404
XM_757724.1	127.575	255.371
XM_757725.1	133.355	360.111
XM_757726.1	158.889	207.268
XM_757727.1	78.149	50.9592
XM_757728.1	808.094	895.686
XM_757729.1	158.89	202.828
XM_757730.1	86.8076	103.353
XM_757731.1	72.2307	163.841
XM_757732.1	0.758246	6.68724
XM_757733.1	54.1074	40.7397
XM_757734.1	121.368	73.7367
XM_757735.1	114.8	166.397
XM_757736.1	113.869	117.308
XM_757737.1	145.851	168.604
XM_757738.1	183.383	69.5088
XM_757739.1	152.17	50.7643
XM_757740.1	45.4275	97.2249
XM_757741.1	445.735	549.439
XM_757742.1	271.544	12.0001
XM_757743.1	331.881	151.397
XM_757744.1	126.665	43.6737
XM_757745.1	122.056	76.1587
XM_757746.1	179.711	153.354
XM_757747.1	701.322	1398.14
XM_757748.1	808.001	688.306
XM_757749.1	264.578	1234.8
XM_757750.1	39.4458	114.782
XM_757751.1	19.6959	2.13197
XM_757752.1	9.63846	15.3133
XM_757753.1	44.9837	120.656
XM_757754.1	255.848	128.119
XM_757755.1	121.379	24.488
XM_757756.1	47.5379	61.8913
XM_757757.1	120.018	151.5
XM_757758.1	20.4569	128.541
XM_757759.1	154.929	156.232
XM_757760.1	151.779	129.851
XM_757761.1	379.256	84.2006
XM_757762.1	103.437	164.273
XM_757763.1	320.267	153.664
XM_757764.1	108.914	113.684
XM_757765.1	94.5117	85.7904
XM_757766.1	225.329	302.875
XM_757767.1	206.583	524.951
XM_757768.1	84.4195	70.5851
XM_757769.1	10.7569	125.398
XM_757770.1	50.77	1043.63
XM_757771.1	210.988	11.1678
XM_757772.1	60.0571	55.7087
XM_757773.1	41.9759	138.37
XM_757774.1	229.317	250.352
XM_757775.1	714.554	937.328
XM_757776.1	781.553	645.539
XM_757777.1	81.778	44.5605
XM_757778.1	144.416	58.716
XM_757779.1	17.826	2.26617
XM_757780.1	13.7038	26.1372
XM_757781.1	163.971	459.108
XM_757782.1	164.758	23.448
XM_757783.1	811.246	36.8024
XM_757784.1	121.534	91.5352
XM_757785.1	518.089	620.457
XM_757786.1	1093.17	1443.11
XM_757787.1	283.792	373.583
XM_757788.1	42.2245	18.549
XM_757789.1	112.696	64.2449
XM_757790.1	74.0936	74.9612
XM_757791.1	64.5393	30.7507
XM_757792.1	214.121	140.529
XM_757793.1	231.598	112.609
XM_757794.1	216.859	73.7493
XM_757795.1	197.248	238.522
XM_757796.1	180.377	309.616
XM_757797.1	188.898	151.801
XM_757798.1	14.7843	229.179
XM_757799.1	115.745	59.823
XM_757800.1	304.212	361.785
XM_757801.1	80.9567	32.2607
XM_757802.1	99.2554	29.9951
XM_757803.1	189.319	524.794
XM_757804.1	92.4278	207.721
XM_757805.1	194.278	209.846
XM_757806.1	417.439	954.717
XM_757807.1	117.319	326.324
XM_757808.1	20.3613	32.1302
XM_757809.1	35.994	88.2011
XM_757810.1	10.7114	35.7427
XM_757811.1	218.82	285.129
XM_757812.1	128.058	458.947
XM_757813.1	105.599	217.743
XM_757814.1	294.353	187.246
XM_757815.1	100.496	131.204
XM_757816.1	6.83743	51.2013
XM_757817.1	85.7944	41.283
XM_757818.1	375.579	184.786
XM_757819.1	63.6891	17.7129
XM_757820.1	85.6959	34.9866
XM_757821.1	46.2211	22.2992
XM_757822.1	289.571	69.0141
XM_757823.1	278.076	290.442
XM_757824.1	43.5229	35.5698
XM_757825.1	55.763	36.0257
XM_757826.1	47.7538	37.8661
XM_757827.1	127.084	64.2049
XM_757828.1	140.45	22.7288
XM_757829.1	212.454	31.5692
XM_757830.1	45.6361	8.45556
XM_757831.1	183.392	71.2571
XM_757832.1	1.57561	1.77774
XM_757833.1	77.7742	85.0061
XM_757834.1	41.0897	44.2002
XM_757835.1	133.127	53.5392
XM_757836.1	27.9769	40.6358
XM_757837.1	33.4938	17.4686
XM_757838.1	304.779	196.511
XM_757839.1	97.1194	42.1306
XM_757840.1	234.529	151.997
XM_757841.1	10.9627	36.1826
XM_757842.1	110.805	30.5222
XM_757843.1	822.609	147.148
XM_757844.1	54.184	95.9069
XM_757845.1	81.9592	35.3664
XM_757846.1	76.5404	29.4446
XM_757847.1	72.0924	47.2416
XM_757848.1	280.525	495.711
XM_757849.1	444.644	853.187
XM_757850.1	665.265	657.127
XM_757851.1	424.065	1173.3
XM_757852.1	255.08	423.11
XM_757853.1	47.0696	69.1834
XM_757854.1	156.338	130.899
XM_757855.1	183.361	339.357
XM_757856.1	140.069	29.3478
XM_757857.1	75.2346	86.7848
XM_757858.1	58.5822	51.5961
XM_757859.1	146.683	175.984
XM_757860.1	5.5624	45.1894
XM_757861.1	304.403	673.977
XM_757862.1	163.841	160.658
XM_757863.1	217.62	194.942
XM_757864.1	94.2902	32.0029
XM_757865.1	141.528	131.772
XM_757866.1	2.16651	1.66872
XM_757867.1	254.645	261.047
XM_757868.1	667.117	385.341
XM_757869.1	20.1011	86.144
XM_757870.1	33.0901	32.1547
XM_757871.1	110.9	49.5569
XM_757872.1	110.477	217.981
XM_757873.1	121.308	124.122
XM_757874.1	226.92	290.426
XM_757875.1	933.919	1246.86
XM_757876.1	293.472	69.1523
XM_757877.1	50.0532	28.8673
XM_757878.1	57.9009	65.7476
XM_757879.1	80.8121	97.4049
XM_757880.1	319.756	200.819
XM_757881.1	23.091	44.9065
XM_757882.1	154.833	58.7528
XM_757883.1	328.508	492.769
XM_757884.1	203.719	1260.57
XM_757885.1	187.469	114.012
XM_757886.1	182.536	603.48
XM_757887.1	1.4556	8.29626
XM_757888.1	105.498	91.8118
XM_757889.1	245.348	115.061
XM_757890.1	161.197	336.979
XM_757891.1	14.3015	124.859
XM_757892.1	819.668	1673.2
XM_757893.1	216.793	70.9621
XM_757894.1	39.9421	49.7545
XM_757895.1	10.6312	69.7737
XM_757896.1	18.3628	537.926
XM_757897.1	4.98059	4.43455
XM_757898.1	44.0451	0.945108
XM_757899.1	76.7968	3.82276
XM_757900.1	76.4169	3.51367
XM_757901.1	3.076	0.661806
XM_757902.1	28.8972	29.6219
XM_757903.1	10.474	0.429154
XM_757904.1	25.9304	4.62176
XM_757905.1	5.08335	0.42557
XM_757906.1	11.974	6.09406
XM_757907.1	19.814	5.92033
XM_757908.1	16.2556	2.87241
XM_757909.1	17.8162	4.18647
XM_757910.1	8.53868	0.762627
XM_757911.1	11.974	6.09406
XM_757912.1	98.9519	25.0562
XM_757913.1	65.7251	48.0983
XM_757914.1	40.8344	4.28535
XM_757915.1	6.82484	0.936618
XM_757916.1	10.474	0.429154
XM_757917.1	34.904	1.24163
XM_757918.1	126.531	25.6234
XM_757919.1	127.594	15.7853
XM_757920.1	114.809	8.88931
XM_757921.1	50.5165	0.218812
XM_757922.1	27.9332	0.451
XM_757923.1	113.464	7.84357
XM_757924.1	15.7794	26.3358
XM_757925.1	18.9671	0.887706
XM_757926.1	11.8411	1.03954
XM_757927.1	123.06	2.30001
XM_757928.1	93.7484	1.04367
XM_757929.1	66.7826	3.01291
XM_757930.1	29.9888	19.0678
XM_757931.1	51.614	20.8061
XM_757932.1	19.8415	44.2724
XM_757933.1	24.6237	105.759
XM_757934.1	7.61603	908.462
XM_757935.1	88	374.389
XM_757936.1	318.994	886.954
XM_757937.1	116.403	182.979
XM_757938.1	139.562	71.5539
XM_757939.1	257.937	121.103
XM_757940.1	222.388	353.34
XM_757941.1	82.0993	100.784
XM_757942.1	362.675	99.5447
XM_757943.1	180.079	240.283
XM_757944.1	360.782	549.393
XM_757945.1	105.381	71.0926
XM_757946.1	120.677	125.827
XM_757947.1	0.767678	2.85772
XM_757948.1	3.72989	9.36844
XM_757949.1	111.091	258.908
XM_757950.1	187.971	190.495
XM_757951.1	212.478	152.233
XM_757952.1	21.6291	80.0729
XM_757953.1	355.579	492.706
XM_757954.1	142.751	28.4854
XM_757955.1	198.825	285.736
XM_757956.1	61.193	23.8208
XM_757957.1	17.0763	12.638
XM_757958.1	56.9464	27.9167
XM_757959.1	130.797	319.735
XM_757960.1	135.843	1407.19
XM_757961.1	159.752	306.49
XM_757962.1	103.779	73.602
XM_757963.1	614.227	425.112
XM_757964.1	324.657	145.285
XM_757965.1	24.7912	19.4191
XM_757966.1	0.860737	1.04363
XM_757967.1	322.401	165.601
XM_757968.1	217.34	571.159
XM_757969.1	250.419	170.865
XM_757970.1	678.506	328.79
XM_757971.1	99.3062	106.106
XM_757972.1	329.829	373.778
XM_757973.1	253.995	389.709
XM_757974.1	132.028	75.7734
XM_757975.1	134.132	60.5985
XM_757976.1	567.641	3594.23
XM_757977.1	221.806	143.452
XM_757978.1	1202.06	780.633
XM_757979.1	129.474	143.537
XM_757980.1	75.9325	27.7906
XM_757981.1	181.789	225.415
XM_757982.1	9.86735	85.2113
XM_757983.1	3.75119	86.6133
XM_757984.1	363.788	223.775
XM_757985.1	600.611	472.85
XM_757986.1	19.5143	249.645
XM_757987.1	84.0124	14.0204
XM_757988.1	112.867	134.536
XM_757989.1	38.8308	307.859
XM_757990.1	341.889	51.691
XM_757991.1	93.8613	76.6981
XM_757992.1	129.797	93.8836
XM_757993.1	1583.33	824.897
XM_757994.1	564.27	343.967
XM_757995.1	180.721	221.474
XM_757996.1	26.5831	80.0498
XM_757997.1	80.3383	25.4866
XM_757998.1	162.789	50.8953
XM_757999.1	2.10002	9.45
XM_758000.1	95.3911	184.093
XM_758001.1	193.187	216.028
XM_758002.1	158.654	91.7454
XM_758003.1	141.597	112.75
XM_758004.1	81.9611	79.9635
XM_758005.1	6.38135	18.6985
XM_758006.1	1.96137	10.4599
XM_758007.1	230.032	160.591
XM_758008.1	89.9226	59.5591
XM_758009.1	82.175	173.028
XM_758010.1	74.7833	341.792
XM_758011.1	89.0383	138.931
XM_758012.1	22.8528	9.07505
XM_758013.1	367.769	393.943
XM_758014.1	263.108	531.104
XM_758015.1	266.524	501.502
XM_758016.1	54.3573	274.53
XM_758017.1	216.46	102.999
XM_758018.1	101.698	279.075
XM_758019.1	324.666	302.259
XM_758020.1	150.337	575.934
XM_758021.1	103.985	28.3002
XM_758022.1	111.191	219.036
XM_758023.1	43.043	117.569
XM_758024.1	4.65258	4.02676
XM_758025.1	219.626	172.173
XM_758026.1	186.728	151.361
XM_758027.1	71.5826	25.9914
XM_758028.1	0.611182	10.3634
XM_758029.1	1.1463	7.08568
XM_758030.1	151.032	114.393
XM_758031.1	135.12	331.482
XM_758032.1	217.707	103.481
XM_758033.1	161.157	125.037
XM_758034.1	150.21	287.853
XM_758035.1	157.737	40.5822
XM_758036.1	91.0196	70.2043
XM_758037.1	97.2314	283.406
XM_758038.1	26.1149	120.257
XM_758039.1	9.7742	10.3834
XM_758040.1	1173.88	1310.45
XM_758041.1	1490.03	1201.71
XM_758042.1	243.21	214.266
XM_758043.1	40.7325	40.936
XM_758044.1	180.391	14.2568
XM_758045.1	126.567	65.4099
XM_758046.1	367.021	84.1955
XM_758047.1	30.4108	25.0829
XM_758048.1	94.0778	159.902
XM_758049.1	140.491	115.754
XM_758050.1	402.015	180.386
XM_758051.1	94.8436	446.38
XM_758052.1	16.6164	20.3928
XM_758053.1	110.118	20.0519
XM_758054.1	304.91	352.111
XM_758055.1	125.944	33.3457
XM_758056.1	75.8852	76.792
XM_758057.1	204.53	209.008
XM_758059.1	12.7692	17.2226
XM_758060.1	9.01554	18.365
XM_758061.1	83.3143	189.907
XM_758062.1	190.583	150.635
XM_758063.1	79.9303	36.0954
XM_758064.1	117.573	155.763
XM_758065.1	52.8735	92.0574
XM_758066.1	20.2328	73.3251
XM_758067.1	229.124	119.815
XM_758068.1	72.5027	30.4116
XM_758069.1	74.5262	54.8175
XM_758070.1	328.411	89.0856
XM_758071.1	82.5565	206.105
XM_758072.1	538.608	837.717
XM_758073.1	343.498	648.171
XM_758074.1	15.916	85.2754
XM_758075.1	77.5144	112.419
XM_758076.1	100.195	2140.09
XM_758077.1	2462.46	1445.44
XM_758078.1	231.27	85.6281
XM_758079.1	86.5593	206.155
XM_758080.1	214.827	612.361
XM_758081.1	158.662	102.03
XM_758082.1	91.8352	430.225
XM_758083.1	50.9741	64.3672
XM_758084.1	126.283	117.322
XM_758085.1	38.0091	181.556
XM_758086.1	33.4553	14.6859
XM_758087.1	83.5194	240.322
XM_758088.1	744.986	1228.37
XM_758089.1	62.2991	59.533
XM_758090.1	131.29	2.90684
XM_758091.1	127.559	627.166
XM_758092.1	225.947	605.339
XM_758093.1	358.395	107.826
XM_758094.1	76.3347	58.8801
XM_758095.1	53.1511	12.148
XM_758096.1	31.8254	56.052
XM_758097.1	138.777	78.7111
XM_758098.1	84.8747	108.797
XM_758099.1	91.972	45.0385
XM_758100.1	89.7334	146.937
XM_758101.1	253.486	49.3991
XM_758102.1	1837.65	328.344
XM_758103.1	1221.12	264.605
XM_758104.1	97.3821	28.6081
XM_758105.1	109.985	101.166
XM_758106.1	74.5447	787.107
XM_758107.1	166.013	161.87
XM_758108.1	284.975	140.036
XM_758109.1	71.1254	55.7609
XM_758110.1	86.4544	215.515
XM_758111.1	314.055	139.917
XM_758112.1	49.6236	32.5155
XM_758113.1	5.75307	21.8206
XM_758114.1	68.9864	194.217
XM_758115.1	105.6	363.88
XM_758116.1	87.0788	60.5528
XM_758117.1	151.23	92.5285
XM_758118.1	9.28469	16.3219
XM_758119.1	13.5349	10.0529
XM_758120.1	78.9305	167.783
XM_758121.1	69.0985	109.019
XM_758122.1	4.94329	18.1463
XM_758123.1	152.257	46.2523
XM_758124.1	119.733	182.066
XM_758125.1	220.83	142.33
XM_758126.1	138.438	80.3364
XM_758127.1	85.5434	54.5119
XM_758128.1	134.977	37.9814
XM_758129.1	87.8273	27.9686
XM_758130.1	48.7932	242.86
XM_758131.1	235.633	177.191
XM_758132.1	9.52394	20.6962
XM_758133.1	45.5933	96.1849
XM_758134.1	50.9868	57.1971
XM_758135.1	308.785	198.661
XM_758136.1	110.393	121.738
XM_758137.1	137.912	119.719
XM_758138.1	1.3585	1.28798
XM_758139.1	49.0791	337.727
XM_758140.1	98.6758	203.815
XM_758141.1	84.5003	101.271
XM_758142.1	2.57858	3318.06
XM_758143.1	3.6569	60.7722
XM_758144.1	2.38636	7.58449
XM_758145.1	49.3445	103.009
XM_758146.1	93.6981	273.79
XM_758147.1	70.2127	65.7584
XM_758148.1	256.675	804.508
XM_758149.1	714.362	310.235
XM_758150.1	97.9367	65.5207
XM_758151.1	405.795	181.963
XM_758152.1	74.1037	45.9216
XM_758153.1	93.4806	83.8661
XM_758154.1	2.79824	19.7365
XM_758155.1	99.8194	44.1819
XM_758156.1	172.438	80.7239
XM_758157.1	89.2812	21.2157
XM_758158.1	102.365	284.954
XM_758159.1	7.82569	12.2037
XM_758160.1	15.5475	42.9467
XM_758161.1	141.956	209.203
XM_758162.1	146.471	84.5999
XM_758163.1	122.913	43.1506
XM_758164.1	39.2953	14.3789
XM_758165.1	40.6662	21.8324
XM_758166.1	37.7117	22.1523
XM_758167.1	0.979128	14.1512
XM_758168.1	1.1473	1.48481
XM_758169.1	105.349	40.8526
XM_758170.1	66.6043	14.6068
XM_758171.1	12.9448	1.28958
XM_758172.1	2.09888	6.52803
XM_758173.1	83.1242	111.281
XM_758174.1	140.61	153.999
XM_758175.1	58.3884	38.8978
XM_758176.1	91.7537	70.3618
XM_758177.1	35.3217	45.9249
XM_758178.1	314.998	482.049
XM_758179.1	127.049	99.7783
XM_758180.1	38.781	60.0349
XM_758181.1	39.8034	51.6258
XM_758182.1	388.077	966.241
XM_758183.1	106.581	248.595
XM_758184.1	73.9344	29.4003
XM_758185.1	81.4087	126.135
XM_758186.1	135.345	58.6395
XM_758187.1	57.5043	91.6502
XM_758188.1	181.254	32.7901
XM_758189.1	161.742	84.5857
XM_758190.1	167.586	530.802
XM_758191.1	123.934	82.885
XM_758192.1	71.6824	94.4847
XM_758193.1	1.59315	13.6372
XM_758194.1	80.5239	57.956
XM_758195.1	170.015	128.633
XM_758196.1	185.674	141.88
XM_758197.1	90.5266	254.796
XM_758198.1	6.49587	34.3719
XM_758199.1	3.56574	15.2911
XM_758200.1	48.3022	27.2511
XM_758201.1	204.51	249.522
XM_758202.1	45.9115	49.062
XM_758203.1	459.782	617.622
XM_758204.1	57.7113	33.6788
XM_758205.1	168.174	451.76
XM_758206.1	25.3725	22580.6
XM_758207.1	52.2936	2493.95
XM_758208.1	25.4556	3898
XM_758209.1	34.3226	440.606
XM_758210.1	36.0351	2998.13
XM_758211.1	49.3618	82.0551
XM_758212.1	2.90498	2.17743
XM_758213.1	77.3379	19.4176
XM_758214.1	57.457	19.22
XM_758215.1	66.604	16.9414
XM_758216.1	176.663	186.444
XM_758217.1	179.905	91.5767
XM_758218.1	250.998	388.974
XM_758219.1	166.693	207.202
XM_758220.1	84.0911	117.825
XM_758221.1	82.8178	37.9914
XM_758222.1	11.6486	31.5065
XM_758223.1	85.5112	3.38962
XM_758224.1	1.54548	4.1584
XM_758225.1	252.016	351.871
XM_758226.1	633.925	145.867
XM_758227.1	139.612	97.6889
XM_758228.1	680.331	907.926
XM_758229.1	66.126	35.0511
XM_758230.1	40.4102	68.8936
XM_758231.1	74.0676	265.495
XM_758232.1	98.3915	164.322
XM_758233.1	62.5756	43.0836
XM_758234.1	112.516	202.959
XM_758235.1	283.936	279.008
XM_758236.1	405.519	102.717
XM_758237.1	534.327	579.342
XM_758238.1	1670.26	2582.9
XM_758239.1	113.796	433.17
XM_758240.1	118.644	251.147
XM_758241.1	97.7807	60.1184
XM_758242.1	110.894	9.59445
XM_758243.1	108.497	153.832
XM_758244.1	1.41346	462.552
XM_758245.1	132.722	63.0021
XM_758246.1	215.266	348.802
XM_758247.1	112.792	52.9182
XM_758248.1	145.999	24.1747
XM_758249.1	561.097	65.0637
XM_758250.1	31.3094	161.854
XM_758251.1	31.8171	577.393
XM_758252.1	30.3212	132.992
XM_758253.1	69.4344	16.9789
XM_758254.1	91.7583	81.5621
XM_758255.1	99.0431	771.331
XM_758256.1	41.5396	121.251
XM_758257.1	117.214	222.986
XM_758258.1	291.79	236.983
XM_758259.1	39.51	287.64
XM_758260.1	86.2703	286.638
XM_758261.1	64.3559	12.4788
XM_758262.1	60.7894	152.424
XM_758263.1	17.502	140.577
XM_758264.1	69.3294	128.629
XM_758265.1	92.2285	159.629
XM_758266.1	89.7206	120.603
XM_758267.1	47.2139	45.478
XM_758268.1	27.0821	125.349
XM_758269.1	134.518	178.187
XM_758270.1	101.369	130.95
XM_758271.1	159.358	136.945
XM_758272.1	482.759	142.713
XM_758273.1	82.3774	32.649
XM_758274.1	49.5606	561.091
XM_758275.1	255.611	121.378
XM_758276.1	83.7562	121.269
XM_758277.1	232	268.258
XM_758278.1	95.8186	101.044
XM_758279.1	95.562	40.1183
XM_758280.1	8.44984	11.1368
XM_758281.1	8.79737	11.6943
XM_758282.1	7.55741	51.4392
XM_758283.1	4.14821	117.632
XM_758284.1	19.8621	64.7505
XM_758285.1	13.664	28.4581
XM_758286.1	106.188	89.9344
XM_758287.1	44.8902	27.7709
XM_758288.1	1.21227	4.44384
XM_758289.1	104.257	67.5176
XM_758290.1	10.5985	1590.14
XM_758291.1	137.464	125.438
XM_758292.1	116.97	11.2966
XM_758293.1	144.573	86.8946
XM_758294.1	102.293	67.9272
XM_758295.1	35.3749	216.996
XM_758296.1	52.4995	65.9339
XM_758297.1	293.692	459.079
XM_758298.1	766.565	819.681
XM_758299.1	129.611	471.892
XM_758300.1	308.43	1108.2
XM_758301.1	244.993	228.271
XM_758302.1	164.342	116.989
XM_758303.1	96.5877	1219.3
XM_758304.1	90.7807	50.3277
XM_758305.1	297.885	462.96
XM_758306.1	167.489	39.2608
XM_758307.1	19.9886	3.32918
XM_758308.1	13.8401	39.6173
XM_758309.1	62.2005	99.3709
XM_758310.1	68.6985	50.8579
XM_758311.1	33.2805	31.334
XM_758312.1	243.838	205.192
XM_758313.1	453.029	1093.19
XM_758314.1	228.515	95.3395
XM_758315.1	78.8768	342.734
XM_758316.1	15.9624	1.89557
XM_758317.1	71.7081	100.684
XM_758318.1	50.927	114.291
XM_758319.1	33.1245	28.4416
XM_758320.1	135.235	85.9121
XM_758321.1	48.0111	71.0924
XM_758322.1	124.301	116.547
XM_758323.1	102.407	308.363
XM_758324.1	119.421	60.8868
XM_758325.1	102.769	62.3815
XM_758326.1	1.9922	4.5411
XM_758327.1	4.23915	8567.31
XM_758328.1	75.2699	186.133
XM_758329.1	64.0192	858.842
XM_758330.1	72.1622	52.9199
XM_758331.1	148.907	489.542
XM_758332.1	114.68	15.3068
XM_758333.1	67.0166	72.4997
XM_758334.1	232.76	192.814
XM_758335.1	97.5679	51.2789
XM_758336.1	41.9887	8.26838
XM_758337.1	59.6644	76.5631
XM_758338.1	77.5667	32.7489
XM_758339.1	128.753	68.2061
XM_758340.1	144.14	34.3694
XM_758341.1	51.006	25.4181
XM_758342.1	238.462	87.3749
XM_758343.1	146.487	39.7552
XM_758344.1	18.1012	62.5366
XM_758345.1	456.329	247.748
XM_758346.1	35.3303	40.7383
XM_758347.1	1418.98	707.532
XM_758348.1	121.72	181.52
XM_758349.1	148.322	124.404
XM_758350.1	49.8801	230.966
XM_758351.1	79.0471	46.7564
XM_758352.1	105.287	85.2352
XM_758353.1	308.293	137.808
XM_758354.1	197.487	540.071
XM_758355.1	478.953	1041.64
XM_758356.1	145.904	424.541
XM_758357.1	52.4076	26.3933
XM_758358.1	179.142	99.5343
XM_758359.1	99.5524	201.642
XM_758360.1	95.9922	131.603
XM_758361.1	151.655	122.531
XM_758362.1	6.4674	4.96366
XM_758363.1	128.238	257.156
XM_758364.1	369.478	152.426
XM_758365.1	199.774	343.453
XM_758366.1	57.1491	92.9131
XM_758367.1	1387.17	1354.02
XM_758368.1	258.11	1484.14
XM_758369.1	266.245	251.559
XM_758370.1	143.893	79.0271
XM_758371.1	143.823	152.949
XM_758372.1	336.83	101.979
XM_758373.1	340.391	246.72
XM_758374.1	451.85	403.741
XM_758375.1	650.939	898.324
XM_758376.1	123.235	127.26
XM_758377.1	42.5997	72.6721
XM_758378.1	52.173	843.256
XM_758379.1	116.57	155.622
XM_758380.1	324.971	412.351
XM_758381.1	430.841	147.748
XM_758382.1	63.9292	119.051
XM_758383.1	48.0665	56.6517
XM_758384.1	200.427	46.5711
XM_758385.1	81.7027	120.189
XM_758386.1	8.531	35.6987
XM_758387.1	142.889	178.307
XM_758388.1	52.7103	12.0457
XM_758389.1	74.8384	26.9329
XM_758390.1	272.259	139.727
XM_758391.1	99.2567	93.6281
XM_758392.1	121.05	47.2996
XM_758393.1	257.87	176.719
XM_758394.1	73.3051	52.7764
XM_758395.1	37.1757	18.4104
XM_758396.1	21.1719	5.39499
XM_758397.1	2.35562	14.6226
XM_758398.1	151.34	96.4667
XM_758399.1	71.3757	62.1824
XM_758400.1	90.025	5.59047
XM_758401.1	147.159	69.0469
XM_758402.1	277.123	195.607
XM_758403.1	1283.27	700.973
XM_758404.1	139.488	78.1394
XM_758405.1	86.5637	41.1237
XM_758406.1	226.776	81.8631
XM_758407.1	1030.66	2970.12
XM_758408.1	200.62	119.155
XM_758409.1	238.538	45.8046
XM_758410.1	148.972	403.539
XM_758411.1	0.808581	6.83094
XM_758412.1	219.433	207.62
XM_758413.1	187.926	68.359
XM_758414.1	112.933	63.9939
XM_758415.1	117.627	94.3911
XM_758416.1	0.583173	10.1457
XM_758417.1	95.2197	325.511
XM_758418.1	82.5691	68.5524
XM_758419.1	0.635922	1.16714
XM_758420.1	145.021	60.454
XM_758421.1	179.87	360.613
XM_758422.1	817.688	1586.91
XM_758423.1	179.887	169.468
XM_758424.1	225.641	318.127
XM_758425.1	142.564	107.313
XM_758426.1	119.984	134.906
XM_758427.1	54.4389	22.7814
XM_758428.1	330.71	303.338
XM_758429.1	287.26	13.1198
XM_758430.1	164.329	113.019
XM_758431.1	129.803	144.222
XM_758432.1	67.7624	71.4869
XM_758433.1	64.3491	3.6379
XM_758434.1	2.95473	649.99
XM_758435.1	85.0891	60.6822
XM_758436.1	131.197	373.399
XM_758437.1	114.619	88.2751
XM_758438.1	325.223	1208.35
XM_758439.1	35.3294	49.4391
XM_758440.1	106.233	22.591
XM_758441.1	206.678	290.87
XM_758442.1	89.4865	87.6611
XM_758443.1	90.7076	268.307
XM_758444.1	1933.09	7549.81
XM_758445.1	64.84	132.793
XM_758446.1	89.5114	63.4705
XM_758447.1	90.0566	148.553
XM_758448.1	296.085	199.238
XM_758449.1	127.721	110.653
XM_758450.1	232.086	134.568
XM_758451.1	254.916	826.325
XM_758452.1	136.119	182.962
XM_758453.1	84.1632	92.9799
XM_758454.1	24.4428	28.4169
XM_758455.1	3.66085	5268.46
XM_758456.1	239.565	125.459
XM_758457.1	351.686	55.1257
XM_758458.1	136.676	273.478
XM_758459.1	63.0232	51.0724
XM_758460.1	24.6802	75.4856
XM_758461.1	8.4962	9.02017
XM_758462.1	384.951	219.676
XM_758463.1	367.535	261.983
XM_758464.1	163.745	192.669
XM_758465.1	210.719	47.8945
XM_758466.1	177.268	186.096
XM_758467.1	243.569	74.9729
XM_758468.1	424.352	698.208
XM_758469.1	38.0136	51.6467
XM_758470.1	39.5682	199.433
XM_758471.1	290.185	135.753
XM_758472.1	184.293	134.171
XM_758473.1	43.7287	21.3564
XM_758474.1	91.8336	82.3093
XM_758475.1	357.142	335.905
XM_758476.1	25.4907	20.1483
XM_758477.1	308.626	596.222
XM_758478.1	712.662	940.497
XM_758479.1	202.776	97.7352
XM_758480.1	62.4415	403.527
XM_758481.1	49.7237	161.658
XM_758482.1	214.545	225.295
XM_758483.1	27.0242	40.805
XM_758484.1	662.367	265.598
XM_758485.1	212.957	157.363
XM_758486.1	106.426	142.037
XM_758487.1	141.283	29.391
XM_758488.1	64.799	5.56222
XM_758489.1	95.3027	80.1578
XM_758490.1	34.1091	14.2437
XM_758491.1	95.1016	21.5719
XM_758492.1	57.8422	83.1447
XM_758493.1	126.442	392.003
XM_758494.1	216.975	242.109
XM_758495.1	176.645	83.5872
XM_758496.1	56.0679	61.3659
XM_758497.1	7.33366	30.5294
XM_758498.1	9.12551	0.248451
XM_758499.1	304.245	207.85
XM_758500.1	291.501	427.092
XM_758501.1	522.199	711.678
XM_758502.1	166.707	100.857
XM_758503.1	237.382	156.482
XM_758504.1	326.551	190.45
XM_758505.1	228.695	103.448
XM_758506.1	151.885	104.519
XM_758507.1	10.2968	6.80085
XM_758508.1	103.378	126.3
XM_758509.1	477.581	267.188
XM_758510.1	388.312	82.6026
XM_758511.1	271.081	259.573
XM_758512.1	739.221	453.987
XM_758513.1	417.111	664.756
XM_758514.1	110.41	137.346
XM_758515.1	70.1298	239.864
XM_758516.1	26.3525	13.2993
XM_758517.1	54.2883	3.07826
XM_758518.1	94.8152	117.148
XM_758519.1	54.3911	71.7657
XM_758520.1	201.57	622.243
XM_758521.1	45.8719	48.5721
XM_758522.1	319.232	469.245
XM_758523.1	33.7567	113.325
XM_758524.1	47.4142	74.4794
XM_758525.1	176.488	111.874
XM_758526.1	291.721	14.0727
XM_758527.1	575.366	521.251
XM_758528.1	652.254	706.427
XM_758529.1	367.321	265.225
XM_758530.1	79.0419	88.6257
XM_758531.1	138.46	135.222
XM_758532.1	13.6942	29.7588
XM_758533.1	126.045	72.828
XM_758534.1	305.022	400.26
XM_758535.1	22.8308	60.6054
XM_758536.1	108.529	149.564
XM_758537.1	1404.08	311.855
XM_758538.1	724.252	1013.39
XM_758539.1	1130.32	1263.4
XM_758540.1	349.906	691.352
XM_758541.1	262.716	40.3931
XM_758542.1	288.168	137.837
XM_758543.1	102.064	63.7586
XM_758544.1	504.108	338.34
XM_758545.1	245.678	129.821
XM_758546.1	434.627	1037.04
XM_758547.1	129.656	223.324
XM_758548.1	158.101	23.7427
XM_758549.1	22.3045	29.0754
XM_758550.1	92.2705	28.9559
XM_758551.1	20.331	30.8822
XM_758552.1	12.1857	0.64186
XM_758553.1	18.911	1.83399
XM_758554.1	13.2411	252.835
XM_758555.1	16.529	8.35634
XM_758556.1	7.21622	5.36073
XM_758557.1	106.804	0.292924
XM_758558.1	102.939	0.755742
XM_758559.1	18.4405	0.377781
XM_758560.1	28.7495	3.38979
XM_758561.1	9.99313	3.59399
XM_758562.1	48.4823	46.3259
XM_758563.1	54.4984	129.415
XM_758564.1	20.7511	11.7258
XM_758565.1	81.0959	45.7532
XM_758566.1	34.9652	20.8881
XM_758567.1	394.986	245.204
XM_758568.1	58.5525	25.8033
XM_758569.1	95.1125	49.4394
XM_758570.1	12.1392	11.1518
XM_758571.1	71.5644	77.656
XM_758572.1	89.7334	92.6976
XM_758573.1	197.687	233.753
XM_758574.1	155.144	223.384
XM_758575.1	50.4445	473.143
XM_758576.1	143.502	476.993
XM_758577.1	113.726	114.461
XM_758578.1	529.323	242.685
XM_758579.1	190.469	374.861
XM_758580.1	62.6023	216.052
XM_758581.1	89.8914	122.372
XM_758582.1	153.957	341.185
XM_758583.1	101.298	116.034
XM_758584.1	64.3294	62.6246
XM_758585.1	128.46	204.822
XM_758586.1	98.4524	252.532
XM_758587.1	147.629	298.035
XM_758588.1	130.188	118.934
XM_758590.1	238.566	271.534
XM_758591.1	143.867	117.923
XM_758592.1	1828.83	1630.01
XM_758593.1	2660.88	905.263
XM_758594.1	74.927	47.1573
XM_758595.1	33.9224	62.3254
XM_758596.1	64.1938	43.2145
XM_758597.1	79.4099	116.748
XM_758598.1	265.228	332.605
XM_758599.1	132.927	168.587
XM_758600.1	8.34121	11.1814
XM_758601.1	539.676	223.623
XM_758602.1	170.393	240.452
XM_758603.1	114.234	67.7113
XM_758604.1	109.983	100.359
XM_758605.1	121.813	76.8806
XM_758606.1	163.657	79.2895
XM_758607.1	80.858	62.292
XM_758608.1	522.485	583.714
XM_758609.1	79.031	48.9904
XM_758610.1	140.915	99.5691
XM_758611.1	120.716	102.371
XM_758612.1	371.373	85.0548
XM_758613.1	1374.32	1837.18
XM_758614.1	92.4907	97.0115
XM_758615.1	139.993	168.76
XM_758616.1	166.859	109.223
XM_758617.1	131.027	166.762
XM_758618.1	907.301	1097.44
XM_758619.1	340.834	682.546
XM_758620.1	127.778	201.368
XM_758621.1	159.763	51.5077
XM_758622.1	120.938	37.0624
XM_758623.1	124.536	40.8687
XM_758624.1	282.984	174.779
XM_758625.1	94.507	314.792
XM_758626.1	0.208841	1.77145
XM_758627.1	2.67619	37.286
XM_758628.1	2.3523	1.5229
XM_758629.1	2.92297	6.05177
XM_758630.1	164.629	118.779
XM_758631.1	288.04	194.904
XM_758632.1	392.51	334.393
XM_758633.1	421.916	131.901
XM_758634.1	234.293	624.551
XM_758635.1	442.325	445.604
XM_758636.1	818.984	575.248
XM_758637.1	2.93741	52.3756
XM_758638.1	4.05982	24.0508
XM_758639.1	2.70304	17.8977
XM_758640.1	17.8869	6.87909
XM_758641.1	59.2172	5.8331
XM_758642.1	14.5032	30.2162
XM_758643.1	1.65096	5.85548
XM_758644.1	4.18901	34.868
XM_758645.1	2.72756	4.39523
XM_758646.1	17.6095	157.399
XM_758647.1	152.893	70.8665
XM_758648.1	68.9583	49.5227
XM_758649.1	192.245	531.605
XM_758650.1	383.84	220.757
XM_758651.1	253.346	261.313
XM_758652.1	638.34	630.781
XM_758653.1	233.738	157.422
XM_758654.1	185.562	147.864
XM_758655.1	234.494	778.746
XM_758656.1	68.3055	108.048
XM_758657.1	33.8963	6.97003
XM_758658.1	12.8503	282.315
XM_758659.1	79.3032	58.4217
XM_758660.1	108.017	88.6086
XM_758661.1	404.81	232.322
XM_758662.1	332.648	63.7652
XM_758663.1	573.411	77.6848
XM_758664.1	17.3632	34.9106
XM_758665.1	31.7078	24.5437
XM_758666.1	358.851	687.025
XM_758667.1	591.452	884.038
XM_758668.1	1.19981	3.57584
XM_758669.1	113.457	5.24719
XM_758670.1	4.75133	37.6721
XM_758671.1	479.152	380.844
XM_758672.1	83.1106	140.453
XM_758673.1	83.6247	369.489
XM_758674.1	160.091	128.281
XM_758675.1	97.1034	409.289
XM_758676.1	52.4604	251.838
XM_758677.1	3.03751	120.291
XM_758678.1	1.21701	52.3546
XM_758679.1	98.4594	96.1628
XM_758680.1	113.32	99.7385
XM_758681.1	112.22	22.3509
XM_758682.1	53.9909	32.1981
XM_758683.1	113.266	71.1411
XM_758684.1	1285.68	711.098
XM_758685.1	130.098	101.797
XM_758686.1	44.5133	95.4697
XM_758687.1	0.777965	7.19191
XM_758688.1	65.3309	108.24
XM_758689.1	82.2164	23.2409
XM_758690.1	46.8893	175.265
XM_758691.1	142.672	65.0271
XM_758692.1	57.0439	3571.19
XM_758693.1	151.491	188.315
XM_758694.1	161.747	142.888
XM_758695.1	114.436	47.1785
XM_758696.1	180.074	29.9721
XM_758697.1	32.3545	58.8156
XM_758698.1	83.4681	30.7025
XM_758699.1	33.5958	26.7159
XM_758700.1	70.981	148.207
XM_758701.1	234.738	126.943
XM_758702.1	615.962	158.826
XM_758703.1	284.856	390.276
XM_758704.1	1474.98	1941.92
XM_758705.1	123.881	297.219
XM_758706.1	51.8696	5.95361
XM_758707.1	200.715	114.239
XM_758708.1	168.33	123.255
XM_758709.1	25.452	81.9959
XM_758710.1	30.3486	21.8615
XM_758711.1	76.1257	80.2241
XM_758712.1	8.5762	8.25058
XM_758713.1	147.029	92.7818
XM_758714.1	35.9225	517.74
XM_758715.1	115.984	182.019
XM_758716.1	231.66	158.204
XM_758717.1	211.096	289.331
XM_758718.1	171.67	42.2542
XM_758719.1	109.306	167.465
XM_758720.1	0.559586	4.44786
XM_758721.1	569.48	473.923
XM_758722.1	745.299	1420.19
XM_758723.1	254.822	29488
XM_758724.1	128.278	164.595
XM_758725.1	24.057	20.0956
XM_758726.1	31.8003	14.1991
XM_758727.1	92.6213	33.7716
XM_758728.1	49.9446	311.625
XM_758729.1	138.061	350.156
XM_758730.1	52.9218	182.138
XM_758731.1	77.2394	396.52
XM_758732.1	90.7486	235.561
XM_758733.1	22.4056	141.39
XM_758734.1	69.5503	227.92
XM_758735.1	53.1346	76.8752
XM_758736.1	135.688	51.1705
XM_758737.1	140.13	153.695
XM_758738.1	78.4825	29.307
XM_758739.1	107.706	55.865
XM_758740.1	25.221	48.7772
XM_758741.1	6.00941	27.0172
XM_758742.1	116.609	76.4651
XM_758743.1	187.963	149.83
XM_758744.1	60.311	29.7841
XM_758745.1	169.513	859.171
XM_758746.1	85.2338	109.277
XM_758747.1	40.0808	47.3795
XM_758748.1	35.3777	17.0589
XM_758749.1	77.3848	37.8301
XM_758750.1	291.718	65.8968
XM_758751.1	15.3445	16.8351
XM_758752.1	76.98	51.6744
XM_758753.1	8.15153	18.4191
XM_758754.1	10.6649	100.667
XM_758755.1	109.944	107.768
XM_758756.1	129.922	37.7158
XM_758757.1	164.038	66.1696
XM_758758.1	220.25	137.978
XM_758759.1	713.881	856.758
XM_758760.1	238.238	233.204
XM_758761.1	252.559	215.787
XM_758762.1	199.957	248.888
XM_758763.1	2.2769	6.21626
XM_758764.1	84.9124	171.501
XM_758765.1	581.647	51.8958
XM_758766.1	175.791	163.884
XM_758767.1	207.124	198.099
XM_758768.1	70.1302	65.3645
XM_758769.1	60.1214	50.2925
XM_758770.1	12.3486	30.0511
XM_758771.1	123.944	138.721
XM_758772.1	443.389	363.139
XM_758773.1	10.8884	26.0646
XM_758774.1	48.9822	56.6226
XM_758775.1	130.994	153.512
XM_758776.1	65.9066	174.855
XM_758777.1	188.68	95.0266
XM_758778.1	212.784	212.667
XM_758779.1	89.9897	39.2162
XM_758780.1	1384.71	2004.59
XM_758781.1	358.978	683.611
XM_758782.1	45.2477	18.9932
XM_758783.1	156.82	371.464
XM_758784.1	142.146	108.325
XM_758785.1	174.551	100.597
XM_758786.1	123.908	181.399
XM_758787.1	25.7418	38.42
XM_758788.1	4.72718	32.2858
XM_758789.1	0.267009	5.15567
XM_758790.1	219.405	186.527
XM_758791.1	147.1	85.0906
XM_758792.1	212.817	471.82
XM_758793.1	193.978	162.953
XM_758794.1	151.345	26.96
XM_758795.1	118.264	65.7983
XM_758796.1	25.5766	29.9704
XM_758797.1	100.888	1.9052
XM_758798.1	88.6405	38.943
XM_758799.1	260.788	238.955
XM_758800.1	220.583	207.022
XM_758801.1	220.793	194.536
XM_758802.1	129.108	107.064
XM_758803.1	221.802	376.491
XM_758804.1	44.6311	41.9356
XM_758805.1	301.864	167.148
XM_758806.1	123.407	73.3855
XM_758807.1	73.2227	105.608
XM_758808.1	549.417	1703.62
XM_758809.1	58.4913	104.612
XM_758810.1	359.417	249.457
XM_758811.1	58.8776	135.509
XM_758812.1	182.645	133.47
XM_758813.1	87.8124	80.6194
XM_758814.1	53.2129	110.405
XM_758815.1	43.0066	62.283
XM_758816.1	63.3073	29.8313
XM_758817.1	23.1769	85.7307
XM_758818.1	30.3571	1.79604
XM_758819.1	611.682	823.191
XM_758820.1	98.4063	166.075
XM_758821.1	95.439	86.6647
XM_758822.1	51.0733	73.5293
XM_758823.1	464.302	126.117
XM_758824.1	703.475	1545.64
XM_758825.1	54.6582	105.099
XM_758826.1	114.834	116.025
XM_758827.1	122.929	126.048
XM_758828.1	59.0861	86.8364
XM_758829.1	76.0801	32.3139
XM_758830.1	942.292	869.509
XM_758831.1	415.103	360.393
XM_758832.1	117.655	37.4839
XM_758833.1	269.565	904.164
XM_758834.1	235.292	182.823
XM_758835.1	83.9686	40.9598
XM_758836.1	47.0093	213.791
XM_758837.1	266.423	131.666
XM_758838.1	1216.07	2475.48
XM_758839.1	146.34	94.2429
XM_758840.1	243.261	144.896
XM_758841.1	154.882	153.023
XM_758842.1	75.1607	43.7188
XM_758843.1	226.783	70.6318
XM_758844.1	147.881	83.595
XM_758845.1	575.087	273.546
XM_758846.1	1208.13	787.922
XM_758847.1	33.3859	55.7129
XM_758848.1	40.1015	48.2822
XM_758849.1	224.654	54.4494
XM_758850.1	285.062	531.689
XM_758851.1	818.134	1914.05
XM_758852.1	43.9175	44.6624
XM_758853.1	191.53	285.612
XM_758854.1	305.572	30.0291
XM_758855.1	236.839	1136.27
XM_758856.1	3.1779	7.64609
XM_758857.1	275.851	152.295
XM_758858.1	1485.32	1974.73
XM_758859.1	311.987	223.639
XM_758860.1	157.452	291.305
XM_758861.1	123.553	91.5077
XM_758862.1	270.254	58.7754
XM_758863.1	69380.2	145.412
XM_758864.1	55504	1307.38
XM_758865.1	87.7211	76.2532
XM_758866.1	177.3	55.9617
XM_758867.1	73.6737	144.921
XM_758868.1	25.7282	55.7322
XM_758869.1	1.41957	8.6217
XM_758870.1	1.05855	0.976531
XM_758871.1	119.789	150.605
XM_758872.1	87.4937	52.2294
XM_758873.1	182.251	21.4304
XM_758874.1	212.511	138.754
XM_758875.1	166.618	58.316
XM_758876.1	77.8487	42.6934
XM_758877.1	1.17285	0.576256
XM_758878.1	6.93897	2.98229
XM_758879.1	1.76888	1.70881
XM_758880.1	76.8953	42.9012
XM_758881.1	6.17059	27.3922
XM_758882.1	112.221	140.084
XM_758883.1	491.573	510.721
XM_758884.1	134.504	466.403
XM_758885.1	82.4832	145.714
XM_758886.1	79.8349	64.104
XM_758887.1	189.783	116.256
XM_758888.1	33.2786	76.8597
XM_758889.1	319.758	181.759
XM_758890.1	79.0137	114.558
XM_758891.1	2.4357	19.6052
XM_758892.1	237.698	819.956
XM_758893.1	110.142	167.204
XM_758894.1	7.42827	22.7463
XM_758895.1	56.168	32.0855
XM_758896.1	33.3776	32.0467
XM_758897.1	65.3039	10.5454
XM_758898.1	77.4359	61.919
XM_758899.1	136.956	550.657
XM_758900.1	142.188	248.163
XM_758901.1	77.5233	48.3637
XM_758902.1	49.7707	128.793
XM_758903.1	83.1554	34.9891
XM_758904.1	38.4005	77.016
XM_758905.1	291.166	103.88
XM_758906.1	80.4239	43.8124
XM_758907.1	69.7	53.817
XM_758908.1	188.685	150.694
XM_758909.1	119.005	53.5524
XM_758910.1	125.017	256.029
XM_758911.1	75.3867	71.3233
XM_758912.1	88.3397	40.2429
XM_758913.1	92.036	98.7908
XM_758914.1	84.9129	134.175
XM_758915.1	121.167	82.6184
XM_758916.1	258.747	302.762
XM_758917.1	37.0238	48.4116
XM_758918.1	124.882	125.127
XM_758919.1	94.3866	12.2992
XM_758921.1	85.9413	333.421
XM_758922.1	151.153	142.826
XM_758923.1	143.727	38.5526
XM_758924.1	148.292	142.733
XM_758925.1	1868.69	712.669
XM_758926.1	369.182	297.548
XM_758927.1	170.26	377.578
XM_758928.1	68.1095	133.525
XM_758929.1	668.384	1455.62
XM_758930.1	14.4733	69.7361
XM_758931.1	185.022	46.9072
XM_758932.1	30.5271	135.071
XM_758933.1	77.9209	40.8542
XM_758934.1	102.269	128.982
XM_758935.1	334.249	641.246
XM_758936.1	874.049	1166.94
XM_758937.1	178.828	99.3929
XM_758938.1	163.161	196.94
XM_758939.1	119.883	441.633
XM_758940.1	121.109	100.55
XM_758941.1	14.2109	49.6533
XM_758942.1	89.2844	86.359
XM_758943.1	109.198	123.291
XM_758944.1	115.996	87.6025
XM_758945.1	102.144	605.64
XM_758946.1	51621.3	1830.28
XM_758947.1	75.5847	60.2772
XM_758948.1	204.049	1.91287
XM_758949.1	0.947336	1.24508
XM_758950.1	1.5229	8.46919
XM_758951.1	116.31	59.0001
XM_758952.1	262.475	174.085
XM_758953.1	130.82	104.41
XM_758954.1	75.0242	120.484
XM_758955.1	162.335	170.666
XM_758956.1	81.5143	110.892
XM_758957.1	145.699	72.0583
XM_758958.1	186.73	58.4482
XM_758959.1	12.5641	16.0588
XM_758960.1	49.0255	75.4505
XM_758961.1	38.2413	438.735
XM_758962.1	7.03799	32.5701
XM_758963.1	426.917	1297.81
XM_758964.1	192.259	333.062
XM_758965.1	32.8872	32.866
XM_758966.1	221.244	122.652
XM_758967.1	5.92396	271.641
XM_758968.1	366.699	35.7567
XM_758969.1	22.2345	299.582
XM_758970.1	37.0618	129.147
XM_758971.1	53.8494	66.0005
XM_758972.1	150.954	281.076
XM_758973.1	98.4081	75.2608
XM_758974.1	85.2985	64.5078
XM_758975.1	68.3602	28.6169
XM_758976.1	100.729	206.917
XM_758977.1	50.5583	62.4503
XM_758978.1	129.611	59.1359
XM_758979.1	394.587	39.1993
XM_758980.1	22.1805	97.9325
XM_758981.1	317.038	280.801
XM_758982.1	169.36	53.9899
XM_758983.1	166.895	170.322
XM_758984.1	57.8292	120.333
XM_758985.1	116.244	64.2055
XM_758986.1	224.641	373.938
XM_758987.1	1.36426	12.993
XM_758988.1	0.73177	24.5337
XM_758989.1	116.062	90.0468
XM_758990.1	24.8555	75.8863
XM_758991.1	32.8015	290.413
XM_758992.1	39.1012	175.913
XM_758993.1	191.66	46.7934
XM_758994.1	823.175	250.368
XM_758995.1	189.457	275.932
XM_758996.1	78.4971	172.71
XM_758997.1	1.31462	10.1061
XM_758998.1	15.7239	92.4964
XM_758999.1	70.364	179.911
XM_759000.1	41.2609	31.1949
XM_759001.1	24.9061	70.688
XM_759002.1	57.4436	171.371
XM_759003.1	274.519	380.106
XM_759004.1	146.375	64.0851
XM_759005.1	169.191	96.9469
XM_759006.1	222.808	53.195
XM_759007.1	53.1949	105.164
XM_759008.1	120.046	164.608
XM_759009.1	98.9711	66.5827
XM_759010.1	62.0101	57.0102
XM_759011.1	189.208	167.566
XM_759012.1	62.6455	16.8565
XM_759013.1	262.347	148.185
XM_759014.1	29.4797	55.1125
XM_759015.1	41.2926	29.3562
XM_759016.1	109.874	74.1134
XM_759017.1	77.839	88.0338
XM_759018.1	706.681	464.452
XM_759019.1	156.845	144.69
XM_759020.1	32.2382	39.655
XM_759021.1	1.2686	1.76933
XM_759022.1	1.31467	0.34175
XM_759023.1	714.411	1482.85
XM_759024.1	90.2735	50.4926
XM_759025.1	48.5386	27.8612
XM_759026.1	264.594	147.589
XM_759027.1	92.0303	72.18
XM_759028.1	30.8402	39.2123
XM_759029.1	246.5	19.9482
XM_759030.1	60.1303	31.9804
XM_759031.1	109.623	235.728
XM_759032.1	64.4715	146.307
XM_759033.1	78.5842	98.4681
XM_759034.1	387.864	283.149
XM_759035.1	474.813	353.671
XM_759036.1	128.42	131.844
XM_759037.1	80.3998	145.311
XM_759038.1	83.1809	165.252
XM_759039.1	113.623	127.188
XM_759040.1	14.7028	55.2249
XM_759041.1	11.9351	48.7923
XM_759042.1	93.0577	37.7017
XM_759043.1	33.4902	19.9349
XM_759044.1	140.614	98.6564
XM_759045.1	42.9811	601.034
XM_759046.1	155.69	77.2523
XM_759047.1	159.271	23.2932
XM_759048.1	43.3619	42.3639
XM_759049.1	88.5807	74.5817
XM_759050.1	70.3224	51.9827
XM_759051.1	155.147	51.7203
XM_759052.1	123.125	73.162
XM_759053.1	60.8722	38.0168
XM_759054.1	46.2538	109.816
XM_759055.1	76.5065	28.5366
XM_759056.1	179.188	124.718
XM_759057.1	146.592	197.73
XM_759058.1	448.423	550.667
XM_759059.1	74.29	25.2475
XM_759060.1	82.4878	205.539
XM_759061.1	124.805	11.4706
XM_759062.1	115.758	217.884
XM_759063.1	64.0743	68.057
XM_759064.1	148.719	171.722
XM_759065.1	134.45	7.94141
XM_759066.1	89.1644	92.5635
XM_759067.1	49.2499	29.2577
XM_759068.1	319.814	412.104
XM_759069.1	68.4564	166.526
XM_759070.1	66.2597	71.9879
XM_759071.1	201.159	76.3305
XM_759072.1	115.522	286.615
XM_759073.1	200.89	52.4417
XM_759074.1	143.911	35.1459
XM_759075.1	121.15	94.9038
XM_759076.1	73.5052	107.318
XM_759077.1	22.1371	106.479
XM_759078.1	38.3204	32.2166
XM_759079.1	159.681	149.024
XM_759080.1	124.304	81.6645
XM_759081.1	54.5465	26.6841
XM_759082.1	122.39	160.916
XM_759083.1	145.466	78.131
XM_759084.1	302.862	791.503
XM_759085.1	993.367	2096.28
XM_759086.1	20.6103	20.7408
XM_759087.1	128.879	617.104
XM_759088.1	139.386	86.2423
XM_759089.1	182.739	292.944
XM_759090.1	112.854	251.38
XM_759091.1	223.582	299.406
XM_759092.1	174.996	183.216
XM_759093.1	108.215	210.203
XM_759094.1	108.211	176.543
XM_759095.1	78.4718	174.966
XM_759096.1	82.3308	100.221
XM_759097.1	51.5856	31.8396
XM_759098.1	46.6691	48.6033
XM_759099.1	27.567	61.8712
XM_759100.1	18.2112	61.4946
XM_759101.1	71.4872	121.082
XM_759102.1	189.245	252.202
XM_759103.1	354.409	227.531
XM_759104.1	243.006	392.773
XM_759105.1	587.762	719.796
XM_759106.1	294.978	324.972
XM_759107.1	48.2266	98.5717
XM_759108.1	378.282	582.186
XM_759109.1	199.793	276.721
XM_759110.1	214.197	140.657
XM_759111.1	60.2899	108.523
XM_759112.1	406.34	1871.7
XM_759113.1	61.5469	119.096
XM_759114.1	129.069	16.0101
XM_759115.1	53.4418	92.6092
XM_759116.1	164.49	19.1475
XM_759117.1	70.6172	103.141
XM_759118.1	110.43	42.9801
XM_759119.1	237.674	200.174
XM_759120.1	94.5261	56.9836
XM_759121.1	114.337	95.4131
XM_759122.1	438.438	660.999
XM_759124.1	5.76501	45.3858
XM_759125.1	39.1821	150.558
XM_759126.1	7.00183	30.5958
XM_759127.1	97.259	254.543
XM_759128.1	89.6214	11.3828
XM_759129.1	122.661	148.435
XM_759130.1	464.085	288.743
XM_759131.1	97.7552	42.8813
XM_759132.1	0.70648	28.7759
XM_759133.1	1.83502	6.78852
XM_759134.1	164.965	91.0283
XM_759135.1	70.8192	64.5462
XM_759136.1	98.0829	61.7551
XM_759137.1	119.229	60.8127
XM_759138.1	49.4326	15.1942
XM_759139.1	185.618	62.0879
XM_759140.1	2.59122	6.43003
XM_759141.1	0.663631	1.61998
XM_759142.1	68.9925	36.4404
XM_759143.1	144.211	334.832
XM_759144.1	7.27064	14.7367
XM_759145.1	104.267	32.6764
XM_759146.1	128.424	55.7148
XM_759147.1	75.2157	76.1322
XM_759148.1	36.5164	157.812
XM_759149.1	637.774	307.969
XM_759150.1	65.8974	20.3969
XM_759151.1	92.1026	180.512
XM_759152.1	115.929	219.609
XM_759153.1	104.539	193.861
XM_759154.1	159.084	145.553
XM_759155.1	212.937	367.803
XM_759156.1	225.405	193.709
XM_759157.1	70.0439	84.9664
XM_759158.1	1723.48	1911.91
XM_759159.1	255.293	662.427
XM_759160.1	162.038	136.529
XM_759161.1	115.234	173.1
XM_759162.1	453.546	308.068
XM_759163.1	88.1501	83.7922
XM_759164.1	150.482	94.2819
XM_759165.1	84.4574	79.1254
XM_759166.1	128.266	205.216
XM_759167.1	89.5801	94.2056
XM_759168.1	86.5485	80.7412
XM_759169.1	18.2997	68.9477
XM_759170.1	14.1587	10.7992
XM_759171.1	46.6735	124.897
XM_759172.1	75.2375	51.7091
XM_759173.1	70.7207	28.1448
XM_759174.1	47.3783	72.9216
XM_759175.1	132.175	142.403
XM_759176.1	70.0099	78.2338
XM_759177.1	247.859	297.394
XM_759178.1	130.567	217.302
XM_759179.1	101.535	54.4713
XM_759180.1	260.233	280.744
XM_759181.1	58.3756	48.4298
XM_759182.1	794.384	201.942
XM_759183.1	232.575	164.535
XM_759184.1	33.6863	27.8429
XM_759185.1	71.6986	79.0027
XM_759186.1	90.6718	35.5466
XM_759187.1	259.735	320.601
XM_759188.1	248.412	146.421
XM_759189.1	99.7699	96.3817
XM_759190.1	62.1023	38.9664
XM_759191.1	116.628	52.1469
XM_759192.1	226.167	37.6106
XM_759193.1	236.576	166.391
XM_759194.1	132.792	174.627
XM_759195.1	44.2291	41.7736
XM_759196.1	45.1799	99.258
XM_759197.1	3.15786	0.926086
XM_759198.1	115.262	0.709133
XM_759199.1	8.14077	26.8922
XM_759200.1	31.0864	403.9
XM_759201.1	76.2475	39.4491
XM_759202.1	202.572	420.453
XM_759203.1	135.541	232.239
XM_759204.1	110.522	127.79
XM_759205.1	556.373	739.375
XM_759206.1	107.086	48.06
XM_759207.1	55.1573	91.9652
XM_759208.1	103.275	37.5919
XM_759209.1	65.6019	80.0769
XM_759210.1	26.9641	20.0633
XM_759211.1	278.064	287.405
XM_759212.1	148.996	170.304
XM_759213.1	72.7599	168.592
XM_759214.1	146.302	70.5121
XM_759215.1	256.166	115.331
XM_759216.1	51.3311	144.459
XM_759217.1	103.669	449.588
XM_759218.1	48610.8	830.742
XM_759219.1	71.6074	200.477
XM_759220.1	48610.8	830.742
XM_759221.1	46.8694	82.9949
XM_759222.1	201.729	399.242
XM_759223.1	467.505	634.931
XM_759224.1	158.952	39.2749
XM_759225.1	91.0825	16.7807
XM_759226.1	579.127	237.015
XM_759228.1	489.071	84.4818
XM_759229.1	341.826	290.305
XM_759230.1	97.0092	63.5563
XM_759231.1	94.832	70.6145
XM_759232.1	166.615	206.96
XM_759233.1	636.364	166.628
XM_759234.1	162.441	38.0518
XM_759235.1	72.1744	165.878
XM_759236.1	57.2326	36.7264
XM_759237.1	639.192	280.377
XM_759238.1	116.576	180.263
XM_759239.1	139.279	152.444
XM_759240.1	35.3049	37.2359
XM_759241.1	191.066	450.155
XM_759242.1	146.433	110.696
XM_759243.1	989.634	300.059
XM_759244.1	9.68804	71.9969
XM_759245.1	156.791	6.44802
XM_759246.1	81.5494	86.7396
XM_759247.1	112.039	586.116
XM_759248.1	35.2821	55.8224
XM_759249.1	14.3818	37.3891
XM_759250.1	2.83391	13.8366
XM_759251.1	6.24906	32.1028
XM_759252.1	95.8145	48.3969
XM_759253.1	150.133	292.669
XM_759254.1	666.111	1346.5
XM_759255.1	96.0428	185.42
XM_759256.1	140.867	245.454
XM_759257.1	172.346	51.3605
XM_759258.1	22.4067	110.343
XM_759259.1	44.4611	47.1402
XM_759260.1	269.749	270
XM_759261.1	36.1893	54.3338
XM_759262.1	332.713	235.681
XM_759263.1	110.317	85.3047
XM_759264.1	237.281	271.304
XM_759265.1	160.817	181.539
XM_759266.1	50.4451	122.841
XM_759267.1	178.973	104.307
XM_759268.1	122.849	101.548
XM_759269.1	213.168	207.713
XM_759270.1	82.275	62.1068
XM_759271.1	103.654	87.5272
XM_759272.1	86.3883	47.1719
XM_759273.1	235.007	239.906
XM_759274.1	137.786	52.5983
XM_759275.1	59.8294	49.4078
XM_759276.1	59.842	12.6081
XM_759277.1	94.8532	110.233
XM_759278.1	88.7992	83.5724
XM_759279.1	698.053	1803.97
XM_759280.1	186.049	65.7962
XM_759281.1	190.361	159.066
XM_759282.1	321.022	376.585
XM_759283.1	192.448	300.586
XM_759284.1	81.8882	6.81741
XM_759285.1	91.7639	115.539
XM_759287.1	51.6837	55.3912
XM_759288.1	128.825	55.1864
XM_759289.1	49.7932	91.0107
XM_759290.1	36.6136	102.671
XM_759291.1	446.231	1325.12
XM_759292.1	548.8	605.897
XM_759293.1	236.078	284.511
XM_759294.1	142.793	163.53
XM_759295.1	768.471	663.44
XM_759296.1	60.3012	134.89
XM_759297.1	51.8154	22.6457
XM_759298.1	226.491	141.125
XM_759299.1	98.1166	56.12
XM_759300.1	52.2082	53.0076
XM_759301.1	73.486	51.6148
XM_759302.1	112.108	104.981
XM_759303.1	92.3034	78.7186
XM_759304.1	295.981	51.7156
XM_759305.1	170.413	200.39
XM_759306.1	165.478	124.599
XM_759307.1	158.249	246.926
XM_759308.1	196.379	139.099
XM_759309.1	675.192	2795.71
XM_759310.1	116.394	224.24
XM_759311.1	1523.41	1847.98
XM_759312.1	395.896	1799.97
XM_759313.1	50.1037	101.203
XM_759314.1	980.659	2191.69
XM_759315.1	300.265	289.59
XM_759316.1	32.2247	212.001
XM_759317.1	113.705	93.7493
XM_759318.1	76.3967	96.9136
XM_759319.1	73.4608	34.5419
XM_759320.1	168.136	58.5929
XM_759321.1	168.526	149.834
XM_759322.1	132.474	72.0056
XM_759323.1	32.7133	26.9309
XM_759324.1	34.9185	34.4695
XM_759325.1	0.663593	2.42675
XM_759326.1	137.196	238.613
XM_759327.1	59.8935	100.92
XM_759328.1	60.1371	24.1195
XM_759329.1	41.4774	82.0637
XM_759330.1	234.691	423.173
XM_759331.1	60.3664	198.181
XM_759332.1	77.4154	88.6947
XM_759333.1	675.917	2303.31
XM_759334.1	257.038	92.7965
XM_759335.1	122.55	181.637
XM_759336.1	191.933	675.724
XM_759337.1	179.159	281.747
XM_759338.1	66.3028	49.4347
XM_759339.1	262.359	266.286
XM_759340.1	13.0545	15.8558
XM_759341.1	112.113	87.9676
XM_759342.1	68.6917	93.8024
XM_759343.1	171.322	85.4994
XM_759344.1	54.2519	34.9841
XM_759345.1	101.367	30.3645
XM_759346.1	190.118	347.584
XM_759347.1	236.164	204.798
XM_759348.1	159.72	42.6329
XM_759349.1	289.749	733.202
XM_759350.1	132.956	148.724
XM_759351.1	127.025	113.108
XM_759352.1	115.861	52.0294
XM_759353.1	97.4006	79.4758
XM_759354.1	98.8946	59.7167
XM_759355.1	130.274	31.5011
XM_759356.1	157.803	314.806
XM_759357.1	80.6324	4.11906
XM_759358.1	112.165	74.7193
XM_759359.1	80.4552	407.84
XM_759360.1	84.1677	218.22
XM_759361.1	290.752	188.46
XM_759362.1	92.5857	150.698
XM_759363.1	194.558	5.75066
XM_759364.1	126.302	2.56589
XM_759365.1	81.7081	104.277
XM_759366.1	102.213	50.1247
XM_759367.1	259.307	111.767
XM_759368.1	202.896	174.688
XM_759369.1	50.238	113.561
XM_759370.1	120.058	114.126
XM_759371.1	328.354	278.149
XM_759372.1	208.094	270.318
XM_759373.1	173.022	176.789
XM_759374.1	80.3393	86.5536
XM_759375.1	147.747	84.6717
XM_759376.1	247.463	246.584
XM_759377.1	333.419	345.452
XM_759378.1	26.2765	29.156
XM_759379.1	222.534	1252.3
XM_759380.1	250.626	2222.5
XM_759381.1	284.601	337.536
XM_759382.1	56.3573	127.858
XM_759383.1	0.396126	0.93896
XM_759384.1	0.662722	0.323902
XM_759385.1	0.310377	3.03694
XM_759386.1	2.90628	15.2244
XM_759387.1	44.6677	52.9274
XM_759388.1	748.654	832.435
XM_759389.1	220.221	100.05
XM_759390.1	63.227	76.4059
XM_759391.1	88.3591	41.153
XM_759392.1	79.4379	114.829
XM_759393.1	116.043	215.393
XM_759394.1	165.443	107.783
XM_759395.1	116.308	401.071
XM_759396.1	94.1531	48.8154
XM_759397.1	104.845	246.553
XM_759398.1	60.2193	33.1395
XM_759399.1	104.616	113.89
XM_759400.1	122.665	335.06
XM_759401.1	171.977	184.876
XM_759402.1	82.9672	215.408
XM_759403.1	41.8293	128.03
XM_759404.1	119.017	118.065
XM_759405.1	134.87	205.085
XM_759406.1	719.635	500.198
XM_759407.1	186.314	720.901
XM_759408.1	206.24	401.821
XM_759409.1	140.081	41.4748
XM_759410.1	138.239	88.7827
XM_759411.1	145.986	178.99
XM_759412.1	124.116	30.2549
XM_759413.1	80.3708	81.1296
XM_759414.1	122.168	66.1719
XM_759415.1	167.49	139.603
XM_759416.1	20.0459	64.7
XM_759417.1	98.6366	65.4113
XM_759418.1	333.103	4.34647
XM_759419.1	136.497	69.6972
XM_759420.1	199.129	392.491
XM_759421.1	220.404	32.7728
XM_759422.1	195.031	175.167
XM_759423.1	46.4182	65.4224
XM_759424.1	169.93	68.4109
XM_759425.1	55.657	133.231
XM_759426.1	88.64	96.248
XM_759427.1	341.393	84.6008
XM_759428.1	77.4263	62.1246
XM_759429.1	155.717	247.931
XM_759430.1	50.428	21.5023
XM_759431.1	2.68438	1.43952
XM_759432.1	123.328	195.659
XM_759433.1	151.12	48.1802
XM_759434.1	107.294	6.03876
XM_759435.1	131.146	2.78161
XM_759436.1	217.028	517.905
XM_759437.1	235.432	250.408
XM_759438.1	187.037	88.4754
XM_759439.1	252.686	330.091
XM_759440.1	4.95994	3.90911
XM_759441.1	58.5014	19.8979
XM_759442.1	29.086	24.8182
XM_759443.1	53.5998	50.8874
XM_759444.1	7.92232	11.3389
XM_759445.1	74.083	64.5555
XM_759446.1	5.25272	6.79545
XM_759447.1	143.76	7.03958
XM_759448.1	310.653	218.738
XM_759449.1	26.7001	27.7871
XM_759450.1	50.1124	49.5801
XM_759451.1	90.7114	6.35835
XM_759452.1	195.062	127.42
XM_759453.1	1297.2	639.164
XM_759454.1	38.3675	196.654
XM_759455.1	185.184	384.638
XM_759456.1	35.0962	30.1384
XM_759457.1	403.976	315.059
XM_759458.1	13.3348	22.1453
XM_759459.1	15.3314	24.7938
XM_759460.1	70.8762	1.44039
XM_759461.1	62.4466	1.75244
XM_759462.1	81.3848	1.3236
XM_759463.1	86.928	0.388734
XM_759464.1	46.5843	2.29254
XM_759465.1	18.2634	3.0955
XM_759466.1	24.1607	12.8675
XM_759467.1	45.9398	30.0513
XM_759468.1	127.713	74.1134
XM_759469.1	5.96173	20.0218
XM_759470.1	5.77248	0.860283
XM_759471.1	103.787	1.46555
XM_759472.1	43.4575	9.04715
XM_759473.1	22.3045	29.0754
XM_759474.1	41.9452	26.287
XM_759475.1	64.8231	49.5108
XM_759476.1	8.60725	20.9411
XM_759477.1	6.07874	190.688
XM_759478.1	3.35805	151.165
XM_759479.1	90.3437	12.0944
XM_759480.1	7.70605	1.99096
XM_759481.1	8.01673	2.67239
XM_759482.1	13.3926	6.98551
XM_759483.1	33.3404	155.361
XM_759484.1	19.3853	12.5842
XM_759485.1	12.4185	4.21545
XM_759486.1	68.0614	1.04081
XM_759487.1	13.1806	4.2426
XM_759488.1	5.56549	11.3586
XM_759489.1	11.6472	0.543753
XM_759490.1	31.7226	81.9305
XM_759491.1	51.2926	41.8348
XM_759492.1	24.8348	560.151
XM_759493.1	7.7348	70.2325
XM_759494.1	22.0532	68.651
XM_759495.1	8.91632	14.2677
XM_759496.1	112.173	25.2476
XM_759497.1	132.996	127.062
XM_759498.1	372.053	226.791
XM_759499.1	77.7834	26.758
XM_759500.1	75.4969	74.9686
XM_759501.1	77.6814	101.753
XM_759502.1	128.406	59.7036
XM_759503.1	88.9091	94.2376
XM_759504.1	99.2391	122.109
XM_759505.1	56.9872	46.7501
XM_759506.1	1.96861	3.66267
XM_759507.1	0.936678	0.899037
XM_759508.1	1.15324	3.02264
XM_759509.1	70.9843	69.8428
XM_759510.1	184.935	110.494
XM_759511.1	75.407	40.5455
XM_759512.1	412.391	913.568
XM_759513.1	12.3815	1.89486
XM_759514.1	312.917	213.64
XM_759515.1	225.022	242.165
XM_759516.1	60.26	49.1107
XM_759517.1	260.061	384.285
XM_759518.1	98.9378	127.228
XM_759519.1	31.264	28.9701
XM_759520.1	48.06	348.824
XM_759521.1	209.762	172.102
XM_759522.1	40.1435	61.2358
XM_759523.1	63.7008	47.5827
XM_759524.1	330.915	407.146
XM_759525.1	126.905	257.874
XM_759526.1	247.515	168.526
XM_759527.1	21.4579	14.5737
XM_759528.1	31.7907	74.0151
XM_759529.1	4.35501	3.16041
XM_759530.1	39.8026	61.3988
XM_759531.1	58.8328	5.25876
XM_759532.1	65.051	63.204
XM_759533.1	132.863	265.025
XM_759534.1	53.0883	109.059
XM_759535.1	110.366	128.141
XM_759536.1	25.7904	18.4439
XM_759537.1	271.142	235.691
XM_759538.1	93.9089	119.835
XM_759539.1	116.842	82.3413
XM_759540.1	568.507	724.492
XM_759541.1	8.42557	40.2034
XM_759542.1	272.646	45.6322
XM_759543.1	322	436.54
XM_759544.1	74.7067	419.909
XM_759545.1	479.875	2113.16
XM_759546.1	140.18	143.469
XM_759547.1	56.4138	23.0501
XM_759548.1	109.998	22.5572
XM_759549.1	81.1039	119.017
XM_759550.1	78.2116	45.9118
XM_759551.1	85.7644	63.9158
XM_759552.1	47.7577	30.316
XM_759553.1	56.9982	40.2829
XM_759554.1	606.113	1099.66
XM_759555.1	83.1234	112.785
XM_759556.1	426.306	275.869
XM_759557.1	135.663	122.944
XM_759558.1	968.523	758.194
XM_759559.1	1201.74	1368.75
XM_759560.1	50.464	138.454
XM_759561.1	169.846	69.965
XM_759562.1	49.671	73.683
XM_759563.1	381.333	493.072
XM_759564.1	99.7849	95.2828
XM_759565.1	667.097	814.211
XM_759566.1	518.512	1007.12
XM_759567.1	260.904	156.291
XM_759568.1	292.647	391.821
XM_759569.1	558.79	1890.2
XM_759570.1	113.091	174.97
XM_759571.1	152.732	203.691
XM_759572.1	137.363	105.052
XM_759573.1	8.82739	43.9974
XM_759574.1	4.44464	14.3379
XM_759575.1	18.0355	140.998
XM_759576.1	32.697	8.60751
XM_759577.1	114.958	294.158
XM_759578.1	247.809	309.061
XM_759579.1	99.8248	122.467
XM_759580.1	94.9271	92.6369
XM_759581.1	128.923	194.188
[truncated: 2,062 more rows]

## Sheet: Schizont 1_abundance.tsv
target_id	length	eff_length	est_counts	tpm
XM_757577.1	618	369.983	40	7.85867
XM_757578.1	534	286.416	185	46.9511
XM_757579.1	741	332.125	2974	650.895
XM_757580.1	237	56.6562	5	6.41496
XM_757581.1	699	450.826	304	49.0158
XM_757582.1	426	181.824	1407	562.489
XM_757583.1	204	46.9904	9	13.9221
XM_757584.1	363	126.431	1431	822.728
XM_757585.1	624	375.946	11	2.12686
XM_757586.1	465	218.886	6	1.99253
XM_757587.1	336	106.089	328	224.738
XM_757588.1	579	331.087	490	107.578
XM_757589.1	624	375.946	2605	503.679
XM_757590.1	306	86.6314	3	2.5172
XM_757591.1	117	21.7827	39	130.144
XM_757592.1	423	179.063	14	5.68322
XM_757593.1	375	136.202	2493	1330.49
XM_757594.1	672	423.826	64	10.9765
XM_757595.1	1236	711.589	17157	1752.6
XM_757596.1	402	160.071	5153	2340.01
XM_757597.1	642	393.907	34	6.27418
XM_757598.1	585	337.054	2094	451.595
XM_757599.1	1509	765.755	5510	523.038
XM_757600.1	1590	818.406	6806	604.498
XM_757601.1	225	53.1553	41	56.0672
XM_757602.1	294	80.1894	4	3.62589
XM_757603.1	183	40.5375	0	0
XM_757604.1	3018	1690.01	11038	474.758
XM_757605.1	1605	855.055	9613	817.216
XM_757606.1	492	245.102	180	53.3823
XM_757607.1	231	55.114	62	81.7713
XM_757608.1	525	277.501	4936.22	1293.01
XM_757609.1	162	34.8238	14	29.2229
XM_757610.1	237	56.6562	918.195	1178.04
XM_757611.1	525	277.501	8629.72	2260.49
XM_757612.1	162	34.8238	9	18.7862
XM_757613.1	237	56.6562	2293.32	2942.31
XM_757614.1	492	245.102	1259	373.379
XM_757615.1	381	141.4	3308	1700.54
XM_757616.1	237	56.6562	1872.49	2402.38
XM_757617.1	525	277.501	1608.06	421.219
XM_757618.1	1092	502.225	3358	486.02
XM_757619.1	948	419.77	709	122.774
XM_757620.1	693	264.104	1341	369.084
XM_757621.1	1407	1236.8	60.8611	3.57696
XM_757622.1	2025	1935.94	55.3073	2.07665
XM_757623.1	2019	1913.03	215.894	8.20335
XM_757624.1	2214	2187.24	24.8933	0.82729
XM_757625.1	2049	2019.48	7.34048	0.264214
XM_757626.1	1440	1330.9	33.7982	1.84595
XM_757627.1	580	332.087	0	0
XM_757628.1	1467	1353.61	31.7563	1.70533
XM_757629.1	2010	1896.44	80.4698	3.08436
XM_757630.1	1476	1365.57	71.3155	3.79613
XM_757631.1	1407	1236.8	60.8611	3.57696
XM_757632.1	1476	1368.19	18.8983	1.00403
XM_757633.1	1647	1490.25	14.6184	0.713036
XM_757634.1	2007	1944.39	20.6324	0.771324
XM_757635.1	1638	1515.44	23.9178	1.14724
XM_757636.1	1440	1330.9	33.7982	1.84595
XM_757637.1	2049	2019.48	7.34048	0.264214
XM_757638.1	2214	2184.35	654.754	21.7885
XM_757639.1	1473	1374.44	428.492	22.6615
XM_757640.1	1818	1701.52	90.2731	3.85649
XM_757641.1	2010	1934.84	29.1396	1.09474
XM_757642.1	2001	1927.11	19.4684	0.734338
XM_757643.1	1470	1318.16	20.7325	1.14328
XM_757644.1	1218	1059.46	11.709	0.803359
XM_757645.1	1249	1107.1	17.1758	1.12772
XM_757646.1	1452	1366.97	5.97858	0.317914
XM_757647.1	1452	1336.34	40.5897	2.20786
XM_757648.1	2388	2304.51	427.984	13.4996
XM_757649.1	237	56.6562	221	283.541
XM_757650.1	833	512.304	845	119.895
XM_757651.1	1359	1041.86	2282	159.213
XM_757652.1	1807	1101.22	2672	176.374
XM_757653.1	222	52.3793	153	212.326
XM_757654.1	1405	1013.86	331	23.7314
XM_757655.1	984	727.778	1692	168.995
XM_757656.1	447	201.603	298	107.446
XM_757657.1	1944	1611.67	1422	64.1348
XM_757658.1	1122	757.026	2915	279.898
XM_757659.1	1092	801.177	2305	209.129
XM_757660.1	2415	1914.12	4747	180.269
XM_757661.1	405	162.574	1009	451.141
XM_757662.1	999	578.676	2433	305.617
XM_757663.1	417	173.476	51	21.3699
XM_757664.1	951	561.541	85	11.0029
XM_757665.1	684	338.259	70	15.0425
XM_757666.1	867	467.576	7	1.08822
XM_757667.1	816	444.368	330	53.9812
XM_757668.1	399	157.464	3	1.38488
XM_757669.1	729	375.636	166	32.1227
XM_757670.1	1192	871.043	6108	509.719
XM_757671.1	1544	1223.35	2850	169.342
XM_757672.1	900	524.64	219	30.3427
XM_757673.1	747	461.007	1235	194.729
XM_757674.1	447	201.603	594	214.171
XM_757675.1	2223	1962.44	8501	314.88
XM_757676.1	1032	854.6	2920	248.366
XM_757677.1	1404	1092.47	4229	281.383
XM_757678.1	2013	1434.16	761	38.5709
XM_757679.1	297	81.7152	436	387.842
XM_757680.1	3687	3333.84	1666	36.3246
XM_757681.1	231	55.114	508	669.997
XM_757682.1	6162	5903.55	19784	243.597
XM_757683.1	1227	861.932	975	82.2249
XM_757684.1	490	243.127	905	270.575
XM_757685.1	3477	3500.99	11687	242.652
XM_757686.1	805	660.144	12530	1379.7
XM_757687.1	984	887.161	1185	97.0929
XM_757688.1	3246	3295.54	6361	140.304
XM_757689.1	498	290.864	1515	378.612
XM_757690.1	1551	1521.87	1086	51.8708
XM_757691.1	2154	1780.22	10	0.408318
XM_757692.1	411	167.999	542	234.512
XM_757693.1	1470	1189.93	3201	195.54
XM_757694.1	4716	4987.64	5220	76.0758
XM_757695.1	1173	849.993	137	11.7159
XM_757696.1	582	348.294	1128	235.416
XM_757697.1	579	349.993	879	182.558
XM_757698.1	7080	7141.89	9385	95.5197
XM_757699.1	5664	5173.75	10733	150.795
XM_757700.1	5766	5512.25	8837	116.533
XM_757701.1	198	44.954	101	163.314
XM_757702.1	339	108.016	35	23.5532
XM_757703.1	1829	1622.98	4295	192.362
XM_757704.1	747	372.321	1049	204.8
XM_757705.1	1116	858.346	265	22.4417
XM_757706.1	3898	3420.36	3826	81.3101
XM_757707.1	1338	998.762	10	0.727796
XM_757708.1	1800	1618.36	3008	135.106
XM_757709.1	633	373.422	179	34.8437
XM_757710.1	624	415.24	1623	284.113
XM_757711.1	546	282.998	65	16.6956
XM_757712.1	1122	747.912	230	22.3537
XM_757713.1	1569	1085.07	1623	108.726
XM_757714.1	679	347.26	3170	663.554
XM_757715.1	408	165.288	155	68.1649
XM_757716.1	294	80.1894	175	158.633
XM_757717.1	222	52.3793	154	213.714
XM_757718.1	846	459.858	782	123.61
XM_757719.1	1434	958.002	1173	89.0027
XM_757720.1	927	693.372	291	30.5069
XM_757721.1	1223	774.298	1736	162.972
XM_757722.1	2254	1852.73	10947	429.493
XM_757723.1	1596	1374.3	1843	97.4798
XM_757724.1	1972	1703.56	2692	114.866
XM_757725.1	937	667.191	1083	117.991
XM_757726.1	384	144.117	375	189.142
XM_757727.1	5172	4163.05	3947	68.9171
XM_757728.1	1009	701.177	6727	697.373
XM_757729.1	1458	1194.28	2107	128.242
XM_757730.1	240	57.5521	99	125.039
XM_757731.1	853	471.396	414	63.839
XM_757732.1	1779	1238.3	16	0.939219
XM_757733.1	1984	1432.55	1093	55.4604
XM_757734.1	1644	1415.75	2113	108.489
XM_757735.1	699	389.092	590	110.223
XM_757736.1	1659	1324.23	1910	104.843
XM_757737.1	240	57.5521	141	178.086
XM_757738.1	177	38.5832	116	218.54
XM_757739.1	219	51.38	110	155.622
XM_757740.1	1413	1021.91	553	39.3354
XM_757741.1	556	281.662	1653	426.596
XM_757742.1	1611	1310.2	4511	250.269
XM_757743.1	273	69.907	378	393.045
XM_757744.1	830	528.804	838	115.192
XM_757745.1	1791	1503.42	2161	104.483
XM_757746.1	1359	1205.01	2610	157.442
XM_757747.1	589	358.529	3296	668.242
XM_757748.1	744	509.549	5444	776.611
XM_757749.1	1234	965.617	3483	262.192
XM_757750.1	1182	772.196	414	38.9712
XM_757751.1	1728	1317.9	342.528	18.8923
XM_757752.1	3546	2877.6	352	8.89167
XM_757753.1	1608	1143.36	581	36.9374
XM_757754.1	1995	1823.11	5523	220.209
XM_757755.1	276	71.2957	186	189.636
XM_757756.1	919	719.068	460	46.5007
XM_757757.1	399	157.464	186	85.8624
XM_757758.1	420	176.316	56	23.0871
XM_757759.1	1761	1360.16	2516	134.459
XM_757760.1	1140	856.203	1739	147.637
XM_757761.1	1848	1646.94	7856	346.733
XM_757762.1	801	644.594	928	104.649
XM_757763.1	315	91.9288	474	374.799
XM_757764.1	390	149.445	250	121.599
XM_757765.1	999	691.306	821	86.3266
XM_757766.1	417	173.476	599	250.991
XM_757767.1	374	135.358	388	208.362
XM_757768.1	2907	2255.15	2289	73.7805
XM_757769.1	2001	1578.63	193	8.88688
XM_757770.1	249	60.6341	37	44.3564
XM_757771.1	2131	1538.28	3723	175.925
XM_757772.1	1734	1266.25	1021	58.611
XM_757773.1	822	511.534	258	36.6621
XM_757774.1	1054	652.336	1930	215.059
XM_757775.1	878	603.155	5025	605.59
XM_757776.1	563	344.143	3160	667.451
XM_757777.1	3735	3474.89	3474	72.6708
XM_757778.1	6929	6226	10552	123.196
XM_757779.1	2181	1630.24	386.09	17.2151
XM_757780.1	3075	2510.23	407.199	11.7914
XM_757781.1	975	738.178	1380	135.891
XM_757782.1	5022	4406.34	8743	144.23
XM_757783.1	162	34.8238	441	920.523
XM_757784.1	1544	1228.19	1868	110.556
XM_757785.1	2460	1896.58	12640	484.447
XM_757786.1	715	486.412	5966	891.56
XM_757787.1	573	252.64	954	274.484
XM_757788.1	609	299.1	159	38.6413
XM_757789.1	1359	1104.14	1533	100.923
XM_757790.1	588	265.507	264	72.2768
XM_757791.1	1629	1119.49	882	57.2691
XM_757792.1	558	338.982	995	213.362
XM_757793.1	1335	1100.28	3086	203.875
XM_757794.1	7470	6553.74	16818	186.534
XM_757795.1	666	354.538	989	202.771
XM_757796.1	1136	856.654	2083	176.748
XM_757797.1	588	347.391	832	174.091
XM_757798.1	585	280.448	65	16.8474
XM_757799.1	1064	629.847	966	111.484
XM_757800.1	324	97.6031	398	296.409
XM_757801.1	1374	997.287	1063	77.4791
XM_757802.1	1257	796.772	1009	92.051
XM_757803.1	471	224.685	367	118.731
XM_757804.1	1410	1019.23	1166	83.1571
XM_757805.1	451	205.398	566	200.305
XM_757806.1	684	399.416	2095	381.268
XM_757807.1	1093	741.757	1138	111.52
XM_757808.1	504	256.876	66	18.6764
XM_757809.1	654	393.685	197	36.3738
XM_757810.1	903	522.846	84	11.6782
XM_757811.1	585	297.654	839	204.891
XM_757812.1	699	439.059	814	134.764
XM_757813.1	1476	1077.96	1336	90.0898
XM_757814.1	357	121.291	507	303.844
XM_757815.1	843	520.274	638	89.1375
XM_757816.1	5391	4443.76	310.183	5.07387
XM_757817.1	3468	3076.64	3181	75.1551
XM_757818.1	1859	1629.96	7225	322.205
XM_757819.1	2703	2318.71	1745	54.7043
XM_757820.1	1800	1463.72	1532	76.0805
XM_757821.1	5280	4297.03	2028	34.3061
XM_757822.1	696	366.444	1410	279.694
XM_757823.1	580	283.104	939	241.096
XM_757824.1	462	216.017	131	44.0814
XM_757825.1	2409	1961.03	1358	50.3369
XM_757826.1	525	286.149	189	48.0111
XM_757827.1	963	765.996	1239	117.575
XM_757828.1	1590	1302.29	2221	123.968
XM_757829.1	1086	673.627	1766	190.565
XM_757830.1	1071	715.986	424	43.046
XM_757831.1	201	46.4309	150	234.831
XM_757832.1	1062	659.693	9	0.991682
XM_757833.1	1182	888.9	851	69.5903
XM_757834.1	948	753.875	356	34.3259
XM_757835.1	594	341.454	664	141.354
XM_757836.1	945	626.45	240	27.8481
XM_757837.1	231	55.114	25	32.9723
XM_757838.1	267	67.2965	259	279.756
XM_757839.1	1390	1061.53	1279	87.5807
XM_757840.1	723	485.115	1326	198.687
XM_757841.1	1047	781.711	102	9.48474
XM_757842.1	2016	1462.77	1994	99.0877
XM_757843.1	195	44.1741	607	998.832
XM_757844.1	1008	617.967	498	58.5781
XM_757845.1	306	86.6314	136	114.113
XM_757846.1	450	204.419	272	96.7208
XM_757847.1	2418	2295.31	1988	62.9575
XM_757848.1	1459	1259.81	4035	232.814
XM_757849.1	448	202.563	1128	404.782
XM_757850.1	339	108.016	1015	683.043
XM_757851.1	768	525.871	2471	341.559
XM_757852.1	780	608.162	1842	220.162
XM_757853.1	2241	2055.79	1213	42.8898
XM_757854.1	1697	1302.25	2536	141.556
XM_757855.1	1371	1131.64	2393	153.711
XM_757856.1	1341	1174.82	2105	130.243
XM_757857.1	2492	2277.07	2173	69.3674
XM_757858.1	2658	2527.71	1764	50.7275
XM_757859.1	3036	3285.25	5877	130.035
XM_757860.1	1269	1069.83	66	4.48437
XM_757861.1	2262	2378.94	9300	284.165
XM_757862.1	673	366.572	760	150.704
XM_757863.1	522	323.267	805	181.011
XM_757864.1	426	181.824	229	91.5493
XM_757865.1	2721	2556.36	4011	114.052
XM_757866.1	1053	806.291	22	1.98336
XM_757867.1	770	577.94	1826	229.662
XM_757868.1	234	55.8481	570	741.887
XM_757869.1	2724	2399.51	605	18.3276
XM_757870.1	783	512.715	201	28.4965
XM_757871.1	1722	1436.61	1927	97.5025
XM_757872.1	1391	1060.26	1523	104.414
XM_757873.1	1254	1083.48	1306	87.6182
XM_757874.1	357	121.291	436	261.294
XM_757875.1	270	68.6015	1062	1125.28
XM_757876.1	1389	1110.52	4044	264.701
XM_757877.1	1251	1086.11	730	48.8561
XM_757878.1	1731	1520.24	994	47.5274
XM_757879.1	1068	761.032	795	75.9339
XM_757880.1	1771	1401.64	5745	297.938
XM_757881.1	1194	801.956	236	21.3911
XM_757882.1	660	280.939	646	167.144
XM_757883.1	1431	1247.54	4963	289.175
XM_757884.1	737	397.813	995	181.809
XM_757885.1	582	342.454	749	158.983
XM_757886.1	633	272.388	699	186.535
XM_757887.1	1584	1068.74	24	1.63235
XM_757888.1	1062	737.191	927	91.4052
XM_757889.1	640	373.588	1142	222.2
XM_757890.1	840	531.201	1150	157.366
XM_757891.1	576	282.349	45	11.585
XM_757892.1	866	607.63	6542	782.605
XM_757893.1	4359	3853.1	10389	195.991
XM_757894.1	4341	3747.21	2053	39.8246
XM_757895.1	5895	4888.27	662	9.84406
XM_757896.1	4128	3571.92	820.891	16.7053
XM_757897.1	2343	1688.28	87	3.74582
XM_757898.1	1209	720.534	362	36.5196
XM_757899.1	1560	1131.69	1020	65.5154
XM_757900.1	1564	1238.72	1071	62.8473
XM_757901.1	1173	825.72	50	4.40158
XM_757902.1	1692	1375.12	441.713	23.3491
XM_757903.1	1989	1597.11	180.935	8.23492
XM_757904.1	1296	895.865	382.739	31.055
XM_757905.1	1533	1150.45	92.0318	5.81491
XM_757906.1	1920	1538.97	222.5	10.5092
XM_757907.1	1530	1205.64	238.954	14.4068
XM_757908.1	447	201.603	36.4317	13.1357
XM_757909.1	1026	715.468	158	16.0523
XM_757910.1	1530	1149.21	79.9682	5.05814
XM_757911.1	1920	1538.97	222.5	10.5092
XM_757912.1	1830	1439.22	1527.05	77.1253
XM_757913.1	1707	1305.72	957	53.2761
XM_757914.1	1824	1418.82	643	32.9424
XM_757915.1	1614	1174.59	106	6.55979
XM_757916.1	1989	1597.11	180.935	8.23492
XM_757917.1	1446	1012.83	378.261	27.1473
XM_757918.1	1395	985.967	1571	115.82
XM_757919.1	1398	1010.29	1539	110.73
XM_757920.1	1095	791.131	1094	100.517
XM_757921.1	1275	875.693	566	46.9825
XM_757922.1	1344	1034.09	423	29.7341
XM_757923.1	462	216.017	391	131.571
XM_757924.1	1854	1436.9	294	14.8727
XM_757925.1	1305	1097.23	274.594	18.1913
XM_757926.1	1590	1310.19	148.624	8.24564
XM_757927.1	1476	1161.94	1588.31	99.3629
XM_757928.1	1476	1172.76	1280.38	79.3597
XM_757929.1	1098	679.348	612	65.4833
XM_757930.1	1707	1258.11	434.646	25.1125
XM_757931.1	1503	1145.5	725	46.006
XM_757932.1	552	304.21	85	20.3103
XM_757933.1	4590	3757.81	1173.13	22.6925
XM_757934.1	2736	2339.39	194	6.02797
XM_757935.1	711	463.964	608	95.2557
XM_757936.1	852	472.987	1876	288.307
XM_757937.1	1679	1531.22	2038	96.7469
XM_757938.1	429	184.657	294	115.732
XM_757939.1	2222	1874.88	6119	237.235
XM_757940.1	1104	942.414	2381	183.649
XM_757941.1	1353	1185.9	1114	68.2824
XM_757942.1	177	38.5832	71	133.762
XM_757943.1	1065	813.601	1857	165.91
XM_757944.1	297	81.7152	415	369.162
XM_757945.1	1287	1048.14	1266	87.7983
XM_757946.1	1068	781.655	1265	117.638
XM_757947.1	2184	1914.96	19	0.721217
XM_757948.1	1440	1198.88	58	3.51659
XM_757949.1	1215	1119.14	1492	96.9072
XM_757950.1	270	68.6015	217	229.931
XM_757951.1	869	653.929	1622	180.298
XM_757952.1	765	608.455	166	19.8313
XM_757953.1	402	160.071	755	342.851
XM_757954.1	1635	1422.9	2645	135.121
XM_757955.1	612	315.956	896	206.136
XM_757956.1	1227	1066.97	800	54.5018
XM_757957.1	774	592.607	124	15.2099
XM_757958.1	998	754.076	543	52.3428
XM_757959.1	1524	1178.27	2034.57	125.516
XM_757960.1	606	348.52	606	126.391
XM_757961.1	564	332.239	782	171.091
XM_757962.1	867	637.488	827	94.2986
XM_757963.1	432	187.412	1631	632.599
XM_757964.1	1131	943.827	4084	314.532
XM_757965.1	606	332.83	63	13.7591
XM_757966.1	1314	1204.12	18	1.08661
XM_757967.1	1323	1140.52	4263	271.696
XM_757968.1	363	126.431	373	214.45
XM_757969.1	273	69.907	227	236.035
XM_757970.1	390	149.445	2023	983.983
XM_757971.1	1434	1430.49	1620	82.3192
XM_757972.1	951	735.873	2901	286.561
XM_757973.1	1581	1348.52	4480	241.486
XM_757974.1	5043	5148.75	8222	116.077
XM_757975.1	1336	1077.63	1640	110.623
XM_757976.1	480	233.318	1913	595.99
XM_757977.1	555	322.236	1072	241.82
XM_757978.1	649	336.313	5729	1238.25
XM_757979.1	540	292.33	469	116.62
XM_757980.1	1506	1007.53	870	62.7675
XM_757981.1	1796	1411.45	3053	157.229
XM_757982.1	1542	1216.42	157	9.38185
XM_757983.1	1257	959.517	42	3.18177
XM_757984.1	660	416.012	1929	337.052
XM_757985.1	3745	3546.26	26446	542.077
XM_757986.1	414	170.739	48	20.4353
XM_757987.1	1806	1453.78	1495	74.7505
XM_757988.1	888	550.846	696	91.8439
XM_757989.1	1422	1222.98	564.87	33.5739
XM_757990.1	1428	1194.27	5054.13	307.621
XM_757991.1	2011	1603.13	1754	79.5304
XM_757992.1	2010	1396.08	2272	118.296
XM_757993.1	321	95.4994	2337	1778.81
XM_757994.1	234	55.8481	435	566.177
XM_757995.1	627	416.272	1021	178.287
XM_757996.1	849	648.799	196	21.9592
XM_757997.1	1600	1318.67	1382	76.1803
XM_757998.1	774	557.444	1243	162.085
XM_757999.1	432	187.412	6	2.32716
XM_758000.1	783	511.219	701	99.6743
XM_758001.1	510	262.771	668	184.787
XM_758002.1	525	250.837	487	141.127
XM_758003.1	1590	1297.87	2113	118.342
XM_758004.1	1866	1591.55	1567	71.5684
XM_758005.1	2121	1550.56	146	6.84439
XM_758006.1	696	388.387	16	2.99451
XM_758007.1	734	437.631	1162	193.005
XM_758008.1	2604	2148.15	2292	77.5571
XM_758009.1	804	495.994	524	76.7939
XM_758010.1	2604	2541.19	2367	67.7069
XM_758011.1	885	663.985	658	72.0343
XM_758012.1	1932	1370.54	359	19.0404
XM_758013.1	837	539.877	2574	346.565
XM_758014.1	695	398.67	1460	266.202
XM_758015.1	984	853.533	2888	245.951
XM_758016.1	951	740.145	556	54.6047
XM_758017.1	1974	1720.57	4522	191.042
XM_758018.1	2568	2730.53	3177	84.575
XM_758019.1	531	311.675	1461	340.738
XM_758020.1	690	409.579	822	145.883
XM_758021.1	432	187.412	315	122.176
XM_758022.1	1377	1283.65	1544	87.4326
XM_758023.1	477	275.489	140	36.9399
XM_758024.1	708	426.004	25	4.26577
XM_758025.1	668	498.036	1240	180.981
XM_758026.1	687	514.906	1372	193.686
XM_758027.1	2970	3021.01	2604	62.6557
XM_758028.1	594	292.605	7	1.73896
XM_758029.1	735	541.277	8	1.07434
XM_758030.1	810	549.552	903	119.44
XM_758031.1	699	545.988	853	113.563
XM_758032.1	2742	2598.37	6545	183.097
XM_758033.1	2007	2119.1	4262	146.195
XM_758034.1	3157	3240.61	5410	121.351
XM_758035.1	1704	1871.04	3540	137.529
XM_758036.1	1998	1910.59	1838	69.9277
XM_758037.1	1683	1335.25	1595	86.8301
XM_758038.1	567	326.494	125	27.8296
XM_758039.1	5091	5021.41	582.261	8.42877
XM_758040.1	165	35.7668	401	814.96
XM_758041.1	135	27.1217	136	364.496
XM_758042.1	438	193.104	595	223.974
XM_758043.1	2076	1623.51	818	36.6245
XM_758044.1	597	293.22	763	189.148
XM_758045.1	2303	1689.7	2669	114.818
XM_758046.1	643	280.247	1455	377.392
XM_758047.1	2244	1543.7	579	27.2639
XM_758048.1	1446	1043.24	1309	91.2068
XM_758049.1	3093	2859.6	4821	122.547
XM_758050.1	1021	691.41	3508	368.804
XM_758051.1	1002	659.865	776	85.4827
XM_758052.1	525	253.282	54	15.4975
XM_758053.1	2997	2471.25	3377	99.3314
XM_758054.1	939	684.332	2565	272.453
XM_758055.1	363	126.431	184	105.787
XM_758056.1	1233	832.331	854	74.5819
XM_758057.1	339	108.016	357	240.243
XM_758059.1	576	310.521	54	12.6408
XM_758060.1	573	250.733	45	13.0458
XM_758061.1	927	701.127	728	75.4755
XM_758062.1	2076	1868.75	4295	167.064
XM_758063.1	1056	761.829	807	76.9995
XM_758064.1	390	149.445	295	143.487
XM_758065.1	1947	1656.18	1033	45.3382
XM_758066.1	786	485.919	95	14.2112
XM_758067.1	1153	803.28	2287	206.953
XM_758068.1	2184	1626.7	1520	67.9216
XM_758069.1	5301	4732.45	4056	62.2994
XM_758070.1	525	250.825	1142	330.954
XM_758071.1	2820	2470.38	2488	73.2079
XM_758072.1	1494	1280.45	8311	471.804
XM_758073.1	4302	3876.82	16550	310.309
XM_758074.1	1824	1468.06	265	13.1212
XM_758075.1	387	146.829	158	78.2197
XM_758076.1	447	201.603	359	129.44
XM_758077.1	411	167.999	7847.2	3395.32
XM_758078.1	2339	2222.36	6369	208.319
XM_758079.1	483	236.271	235	72.2985
XM_758080.1	675	406.179	1136	203.298
XM_758081.1	552	266.597	632	172.319
XM_758082.1	937	664.909	847	92.5961
XM_758083.1	1506	1108.11	674	44.2128
XM_758084.1	1296	1027.06	1513	107.081
XM_758085.1	1470	1317.61	576	31.7766
XM_758086.1	1350	953.39	375	28.5912
XM_758087.1	1555	1214.84	1101	65.878
XM_758088.1	603	371.726	3058	597.979
XM_758089.1	1995	1523.54	1243	59.3048
XM_758090.1	4962	4554.12	7162	114.315
XM_758091.1	420	176.316	284	117.084
XM_758092.1	673	463.779	1279	200.461
XM_758093.1	7086	6939.86	31050	325.224
XM_758094.1	720	397.892	351	64.123
XM_758095.1	6840	5381.81	3364	45.4359
XM_758096.1	2037	1631.26	575	25.6222
XM_758097.1	2967	2442.23	4110	122.328
XM_758098.1	529	281.501	275	71.0107
XM_758099.1	417	173.476	208	87.1556
XM_758100.1	951	693.38	859	90.052
XM_758101.1	501	253.901	704	201.549
XM_758102.1	240	57.5521	1002	1265.55
XM_758103.1	351	116.839	2346	1459.53
XM_758104.1	1335	1053.34	1241	85.6393
XM_758105.1	2217	1955.96	2275	84.5459
XM_758106.1	2253	2036.4	1899	67.785
XM_758107.1	1473	1175.44	2705	167.278
XM_758108.1	1647	1503.05	4968	240.259
XM_758109.1	1443	1293.65	1360	76.4174
XM_758110.1	5046	5647.95	5771	74.2731
XM_758111.1	1179	862.581	3289	277.163
XM_758112.1	426	181.824	148	59.1672
XM_758113.1	1098	887.475	59	4.83245
XM_758114.1	276	71.2957	82	83.6031
XM_758115.1	132	25.7867	13	36.6454
XM_758116.1	714	477.916	520	79.0904
XM_758117.1	2871	2303.28	4085	128.919
XM_758118.1	1041	727.603	95.8275	9.57342
XM_758119.1	1107	825.052	129.172	11.3805
XM_758120.1	2520	2189.33	2131	70.7528
XM_758121.1	1989	1653.76	1366	60.0412
XM_758122.1	2139	1664.62	135	5.8951
XM_758123.1	453	207.336	451	158.115
XM_758124.1	1172	969.689	1384	103.747
XM_758125.1	2550	2365.17	6419	197.277
XM_758126.1	1530	1324.52	2132	117.004
XM_758127.1	4366	3942.42	3973	73.2533
XM_758128.1	2532	2258.61	3687	118.66
XM_758129.1	1173	816.06	865	77.0487
XM_758130.1	1416	1051.78	614	42.4341
XM_758131.1	2097	1969.99	5349	197.37
XM_758132.1	1530	1024.97	110	7.80106
XM_758133.1	903	572.116	310	39.3866
XM_758134.1	744	391.302	300	55.729
XM_758135.1	1740	1445.94	5513	277.146
XM_758136.1	321	95.4994	145	110.367
XM_758137.1	3324	3104.31	5070	118.717
XM_758138.1	3363	3239.86	74	1.66026
XM_758139.1	615	278.622	201	52.4387
XM_758140.1	1517	1321.41	1476	81.1933
XM_758141.1	1487	1023.11	1101	78.2236
XM_758142.1	543	319.944	12	2.72633
XM_758143.1	885	554.243	30	3.93453
XM_758144.1	882	638.774	17	1.93452
XM_758145.1	1512	1344.22	805	43.5307
XM_758146.1	414	170.739	223	94.9388
XM_758147.1	1251	1055.27	901	62.0628
XM_758148.1	561	313.087	900	208.953
XM_758149.1	1251	1014.16	9176	657.688
XM_758150.1	549	287.964	322	81.2809
XM_758151.1	631	357.357	2017	410.275
XM_758152.1	1500	1334.05	1159	63.1512
XM_758153.1	441	196.006	274	101.614
XM_758154.1	705	391.7	15	2.78362
XM_758155.1	1977	1905.98	2362	90.0811
XM_758156.1	1563	1352.71	3020	162.284
XM_758157.1	1895	1661.96	1902	83.1879
XM_758158.1	1391	1011.33	1313	94.3716
XM_758159.1	759	469.545	53	8.20484
XM_758160.1	3171	2856.14	530	13.4886
XM_758161.1	2746	2393.94	4053	123.065
XM_758162.1	5244	4865.16	8495	126.922
XM_758163.1	1396	878.076	1332	110.266
XM_758164.1	1164	660.962	301	33.1026
XM_758165.1	1923	1328.39	716	39.1796
XM_758166.1	3930	2875.83	1321	33.3896
XM_758167.1	4281	3516.18	47	0.971623
XM_758168.1	5220	4447.51	78	1.27482
XM_758169.1	2631	1906.99	2460	93.7687
XM_758170.1	1152	633.079	591	67.8581
XM_758171.1	933	606.953	84	10.0599
XM_758172.1	1785	1595.51	32	1.45788
XM_758173.1	1479	1080.81	1010	67.9273
XM_758174.1	1173	984.204	1733	127.993
XM_758175.1	1233	858.481	612	51.8194
XM_758176.1	2187	1633.83	1872	83.2855
XM_758177.1	1113	767.945	334	31.6146
XM_758178.1	1218	1078.49	4222	284.559
XM_758179.1	1066	800.032	1335	121.296
XM_758180.1	420	176.316	105	43.2882
XM_758181.1	345	112.474	47	30.3751
XM_758182.1	1365	1268.12	6088	348.967
XM_758183.1	1782	1486.27	1957	95.7115
XM_758184.1	1107	781.501	737	68.5503
XM_758185.1	1353	984.958	1035	76.3825
XM_758186.1	594	345.614	584	122.827
XM_758187.1	1005	676.533	490	52.6476
XM_758188.1	2367	1771.85	4009	164.468
XM_758189.1	1176	953.161	1999	152.447
XM_758190.1	747	458.931	1024	162.19
XM_758191.1	1680	1320.92	2135	117.488
XM_758192.1	582	301.948	302	72.702
XM_758193.1	3465	3072.34	53	1.25394
XM_758194.1	828	566.43	598	76.7408
XM_758195.1	2050	1564.22	3270	151.957
XM_758196.1	828	579.01	1477	185.424
XM_758197.1	660	289.131	426	107.099
XM_758198.1	330	101.783	20	14.2833
XM_758199.1	534	286.416	18	4.56821
XM_758200.1	1134	795.32	475	43.4133
XM_758201.1	1080	791.748	1969	180.772
XM_758202.1	522	274.501	187	49.5186
XM_758203.1	171	36.9457	131	257.738
XM_758204.1	1881	1540.39	1035	48.8405
XM_758205.1	1383	1201.49	2802	169.52
XM_758206.1	1494	1391.36	340	17.7628
XM_758207.1	1386	1268.29	911	52.2122
XM_758208.1	1326	960.546	277	20.962
XM_758209.1	1332	1092.33	491.767	32.7248
XM_758210.1	1323	1137.53	569.233	36.3747
XM_758211.1	339	108.016	73	49.1253
XM_758212.1	2130	2051.57	76	2.69276
XM_758213.1	2103	1731.96	1565	65.6822
XM_758214.1	1014	616.099	431	50.8509
XM_758215.1	1773	1403.85	1067	55.2478
XM_758216.1	336	106.089	375	256.942
XM_758217.1	8211	9031.93	18348	147.666
XM_758218.1	804	608.677	1876	224.036
XM_758219.1	758	553.265	1009	132.565
XM_758220.1	1326	959.853	926	70.1258
XM_758221.1	2529	2542.26	2421	69.2223
XM_758222.1	1887	1664.35	248	10.8312
XM_758223.1	636	327.61	357.549	79.3324
XM_758224.1	2313	2475.65	45	1.32128
XM_758225.1	621	447.9	1264	205.134
XM_758226.1	396	154.69	1606	754.666
XM_758227.1	900	690.32	1270	133.729
XM_758228.1	246	59.4499	561	685.935
XM_758229.1	1425	1296.91	1096	61.429
XM_758230.1	2463	2550.33	1231	35.086
XM_758231.1	987	845.416	725	62.336
XM_758232.1	480	233.318	337	104.991
XM_758233.1	1128	1023.27	746	52.9931
XM_758234.1	919	637.006	870	99.2766
XM_758235.1	384	144.117	679	342.472
XM_758236.1	3129	3028.28	15051	361.278
XM_758237.1	195	44.1741	152	250.119
XM_758238.1	120	22.3731	111	360.636
XM_758239.1	1062	890.001	1325	108.217
XM_758240.1	1035	880.487	1319	108.891
XM_758241.1	3120	2998.12	3424	83.0149
XM_758242.1	645	442.718	621	101.961
XM_758243.1	2580	2562.02	3580	101.572
XM_758244.1	546	325.729	8	1.78528
XM_758245.1	804	551.884	878	115.643
XM_758246.1	573	322.653	1046	235.65
XM_758247.1	922	709.154	993	101.784
XM_758248.1	537	294.838	677	166.908
XM_758249.1	201	46.4309	457	715.452
XM_758250.1	294	80.1894	39	35.3524
XM_758251.1	315	91.9288	49	38.745
XM_758252.1	3378	2914.17	1108	27.6373
XM_758253.1	663	451.607	407	65.5096
XM_758254.1	954	644.557	706	79.6187
XM_758255.1	1449	1259.26	1562	90.1646
XM_758256.1	2421	2141.9	1198	40.6564
XM_758257.1	852	605.53	893	107.198
XM_758258.1	228	54.2449	299	400.667
XM_758259.1	747	491.131	219	32.4129
XM_758260.1	603	338.553	290	62.2648
XM_758261.1	3012	2365.12	1812	55.6898
XM_758262.1	1881	1501.13	1202.57	58.2323
XM_758263.1	1650	1234.4	363.423	21.4007
XM_758264.1	1671	1350.93	1142.58	61.4791
XM_758265.1	1614	1165.51	1487.58	92.7759
XM_758266.1	1614	1218.4	1421	84.7764
XM_758267.1	1659	1264.69	761.845	43.7878
XM_758268.1	1662	1255.01	443	25.6583
XM_758269.1	1344	944.979	1623	124.844
XM_758270.1	930	670.15	814	88.2925
XM_758271.1	1437	1077.77	2075	139.947
XM_758272.1	1706	1527.82	9418	448.083
XM_758273.1	1584	1283.9	1258	71.223
XM_758274.1	1374	1148.62	745.911	47.2043
XM_758275.1	1356	1062.94	3546.09	242.5
XM_758276.1	1653	1230.77	1342	79.2587
XM_758277.1	616	329.147	991	218.854
XM_758278.1	1475	1093.96	1213	80.5995
XM_758279.1	3462	2731.98	3122	83.0666
XM_758280.1	270	68.6015	13	13.7747
XM_758281.1	264	66.3333	12	13.1499
XM_758282.1	303	84.9214	12	10.2715
XM_758283.1	360	123.805	15	8.80692
XM_758284.1	1506	1305.76	268	14.9192
XM_758285.1	525	277.501	59	15.4546
XM_758286.1	1368	1119.12	1459	94.7652
XM_758287.1	4062	3302.08	1801	39.6458
XM_758288.1	948	669.197	14	1.52071
XM_758289.1	861	497.847	707	103.227
XM_758290.1	570	396.307	50	9.17085
XM_758291.1	471	224.685	401	129.73
XM_758292.1	633	393.754	563	103.933
XM_758293.1	1329	1102.29	2015	132.878
XM_758294.1	5160	4112.93	4895	86.5114
XM_758295.1	873	649.776	302	33.7843
XM_758296.1	3036	2444.84	1599	47.5411
XM_758297.1	539	283.875	1113	284.996
XM_758298.1	374	135.358	1563	839.354
XM_758299.1	1070	671.145	1167	126.394
XM_758300.1	1356	1195.9	4925	299.352
XM_758301.1	1353	985.483	3202	236.18
XM_758302.1	4569	4283.01	8517	144.547
XM_758303.1	1624	1469.15	1793	88.7128
XM_758304.1	4308	3748.98	4094	79.3791
XM_758305.1	366	128.794	664	374.753
XM_758306.1	2700	2112.45	4240	145.899
XM_758307.1	2211	1479.49	354	17.3925
XM_758308.1	1521	944.198	189	14.5502
XM_758309.1	777	435.855	362	60.3724
XM_758310.1	3028	2325.06	1991	62.2455
XM_758311.1	837	562.658	230	29.7136
XM_758312.1	2991	2467.79	7286	214.611
XM_758313.1	276	71.2957	460	468.993
XM_758314.1	1656	1367.76	4110	218.426
XM_758315.1	588	287	260	65.8512
XM_758316.1	996	590.609	125	15.3844
XM_758317.1	672	309.711	293	68.7675
XM_758318.1	1134	819.417	591	52.4269
XM_758319.1	1377	1075.09	456	30.8312
XM_758320.1	4275	3671.41	5868	116.179
XM_758321.1	3134	2701.06	1576	42.4124
XM_758322.1	4143	3547.65	5365	109.926
XM_758323.1	819	575.916	746	94.1566
XM_758324.1	2463	2159.19	3093	104.126
XM_758325.1	1022	738.059	878	86.4719
XM_758326.1	2142	1547.34	43	2.02002
XM_758327.1	549	348.414	11.4789	2.39484
XM_758328.1	822	533.642	405	55.1667
XM_758329.1	1791	1698.57	1320	56.4887
XM_758330.1	3447	2934.46	2656	65.7918
XM_758331.1	507	259.85	542	151.617
XM_758332.1	2040	2099.19	2850	98.6882
XM_758333.1	2760	2756.12	2095	55.2531
XM_758334.1	822	540.824	1539	206.849
XM_758335.1	1241	827.306	1106	97.1764
XM_758336.1	2601	2159.23	1092	36.7617
XM_758337.1	651	375.538	258	49.9387
XM_758338.1	1473	1143.36	1055	67.0721
XM_758339.1	462	216.017	470	158.155
XM_758340.1	465	218.886	484	160.731
XM_758341.1	1542	1189.18	761	46.5167
XM_758342.1	561	298.4	934	227.52
XM_758343.1	2757	2299.17	4042	127.79
XM_758344.1	1149	869.827	168	14.0394
XM_758345.1	285	75.5406	327	314.658
XM_758346.1	846	524.852	237	32.8233
XM_758347.1	1815	1664.52	30493	1331.63
XM_758348.1	889	581.768	859	107.329
XM_758349.1	1389	1206.09	2137	128.795
XM_758350.1	684	356.237	220	44.8905
XM_758351.1	1875	1472.01	1438	71.0101
XM_758352.1	1288	971.299	1247	93.3222
XM_758353.1	408	165.288	816	358.855
XM_758354.1	861	592.205	1416	173.805
XM_758355.1	390	149.445	709	344.856
XM_758356.1	552	304.21	536	128.074
XM_758357.1	1176	746.866	465	45.2566
XM_758358.1	522	308.255	776	182.988
XM_758359.1	1077	807.413	990	89.1274
XM_758360.1	1701	1297.87	1535	85.9705
XM_758361.1	849	570.596	992	126.373
XM_758362.1	351	116.839	12	7.4656
XM_758363.1	1749	1608.21	2693	121.721
XM_758364.1	273	69.907	387	402.404
XM_758365.1	2382	2375.78	5984	183.087
XM_758366.1	2151	1452.35	933	46.6963
XM_758367.1	216	50.7437	720	1031.39
XM_758368.1	1402	1483.06	4732	231.93
XM_758369.1	714	515.108	1679	236.932
XM_758370.1	1398	1197.26	1954	118.633
XM_758371.1	516	282.999	612	157.195
XM_758372.1	869	615.154	2729	322.471
XM_758373.1	690	486.074	1916	286.526
XM_758374.1	989	708.616	3745	384.16
XM_758375.1	444	198.846	2375	868.196
XM_758376.1	480	233.318	411	128.046
XM_758377.1	3249	3099.62	1619	37.9673
XM_758378.1	3345	3204.65	1969	44.6619
XM_758379.1	1056	837.164	1049	91.0828
XM_758380.1	636	399.358	1649	300.144
XM_758381.1	501	253.901	1563	447.472
XM_758382.1	1161	857.411	672	56.9708
XM_758383.1	939	601.279	365	44.1254
XM_758384.1	354	119.148	389	237.321
XM_758385.1	1215	1018.69	1063	75.8515
XM_758386.1	972	716.143	76	7.7141
XM_758387.1	3027	3113.23	5669	132.363
XM_758388.1	1575	914.702	625.587	49.7141
XM_758389.1	1578	909.006	887.044	70.9333
XM_758390.1	672	321.16	1416	320.489
XM_758391.1	1575	898.449	1247.61	100.938
XM_758392.1	1566	906.23	1392.24	111.672
XM_758393.1	1386	1129.47	3510	225.893
XM_758394.1	1575	901.156	835.743	67.413
XM_758395.1	1569	922.447	450.541	35.503
XM_758396.1	1578	908.777	228.239	18.2559
XM_758397.1	933	673.943	13	1.40214
XM_758398.1	547	295.903	695	170.729
XM_758399.1	2421	2290.9	2125	67.4257
XM_758400.1	5691	5058.5	5505	79.1056
XM_758401.1	3750	3551.49	6025	123.316
XM_758402.1	987	636.597	2149	245.382
XM_758403.1	436	191.162	3197	1215.66
XM_758404.1	1978	1782.1	2988	121.876
XM_758405.1	1970	1469.63	1237.96	61.2309
XM_758406.1	378	138.913	423	221.345
XM_758407.1	276	71.2957	1196	1219.38
XM_758408.1	1365	1344.49	3329	179.981
XM_758409.1	1380	1323.81	3788	207.997
XM_758410.1	840	569.002	1050	134.136
XM_758411.1	699	479.929	8	1.21167
XM_758412.1	2276	2516.36	6625	191.375
XM_758413.1	4218	4860.03	11158	166.886
XM_758414.1	5091	5149.52	7379	104.16
XM_758415.1	1411	1280.22	1785	101.35
XM_758416.1	642	362.994	1	0.20025
XM_758417.1	1035	895.581	1001	81.2458
XM_758418.1	3090	2929.7	2922	72.4983
XM_758419.1	2157	1814.95	9	0.360453
XM_758420.1	381	141.4	380	195.347
XM_758421.1	1072	766.317	1673	158.693
XM_758422.1	417	173.476	2098	879.099
XM_758423.1	1815	1704.57	3687	157.228
XM_758424.1	777	520.872	1586	221.332
XM_758425.1	2865	2941.97	5323	131.519
XM_758426.1	2376	2199.66	3256	107.597
XM_758427.1	5214	4502.23	3080	49.7273
XM_758428.1	1875	1849.08	7573	297.703
XM_758429.1	3189	3187.64	11063	252.276
XM_758430.1	731	448.383	774	125.477
XM_758431.1	1184	971.418	1594	119.276
XM_758432.1	2808	2119.55	1765	60.5304
XM_758433.1	1614	1394.93	1211	63.1049
XM_758434.1	570	350.51	14	2.90335
XM_758435.1	1038	770.29	843	79.5508
XM_758436.1	876	510.237	874	124.512
XM_758437.1	1566	1287.82	1834	103.518
XM_758438.1	410	167.084	735	319.759
XM_758439.1	615	348.691	171	35.6473
XM_758440.1	842	550.572	758	100.075
XM_758441.1	913	704.053	1520	156.931
XM_758442.1	1818	1350.56	1420	76.4267
XM_758443.1	456	210.188	217	75.0452
XM_758444.1	81	15.1667	231	1107.12
XM_758445.1	1095	827.495	613	53.8476
XM_758446.1	2714	2477.87	2409	70.6692
XM_758447.1	1215	1027.07	954	67.5182
XM_758448.1	1130	834.051	3083	268.691
XM_758449.1	486	274.842	465	122.982
XM_758450.1	1361	1174.69	3562	220.416
XM_758451.1	426	181.824	641	256.258
XM_758452.1	2274	1799.55	3213	129.783
XM_758453.1	2678	2344.86	2328	72.1669
XM_758454.1	3219	2642.44	858	23.6022
XM_758455.1	549	405.073	14.5211	2.60578
XM_758456.1	1359	1064.53	3225	220.212
XM_758457.1	348	114.649	706	447.618
XM_758458.1	717	407.259	861	153.675
XM_758459.1	1188	853.714	840	71.5218
XM_758460.1	732	369.328	109	21.4529
XM_758461.1	2358	2152.42	209	7.05815
XM_758462.1	465	218.886	1307	434.04
XM_758463.1	2697	2921.24	13143	327.039
XM_758464.1	1725	1525.71	3124	148.837
XM_758465.1	468	221.775	671	219.928
XM_758466.1	522	255.089	742	211.438
XM_758467.1	2685	2912.49	8039	200.636
XM_758468.1	369	131.187	948	525.278
XM_758469.1	3183	3402.89	1625	34.7118
XM_758470.1	1473	1232.87	562	33.1354
XM_758471.1	1470	1377.32	4728	249.525
XM_758472.1	1284	1154.04	2536	159.736
XM_758473.1	3633	3564.08	1996	40.7085
XM_758474.1	1632	1642.37	1749	77.4087
XM_758475.1	483	288.525	1445	364.046
XM_758476.1	1494	1375.33	433	22.8851
XM_758477.1	525	302.371	1450	348.577
XM_758478.1	1638	1723.57	16201	683.258
XM_758479.1	1624	1685.78	4357	187.871
XM_758480.1	1542	1388.34	1064	55.708
XM_758481.1	1911	1792.95	1167	47.3123
XM_758482.1	1023	774.735	1954	183.334
XM_758483.1	912	671.485	252	27.2795
XM_758484.1	2674	2409.1	18775	566.495
XM_758485.1	357	121.291	452	270.883
XM_758486.1	798	364.187	487	97.2021
XM_758487.1	2208	1686.05	2883	124.292
XM_758488.1	2436	1629.24	1391	62.0601
XM_758489.1	1138	759.05	883	84.5594
XM_758490.1	4134	3341.97	1345	29.2544
XM_758491.1	1974	1358	1616	86.4996
XM_758492.1	1344	985.005	615	45.3845
XM_758493.1	2682	2608.27	4043	112.674
XM_758494.1	975	660.892	1678	184.558
XM_758495.1	2371	1869.51	4164	161.902
XM_758496.1	1785	1436.92	973	49.2212
XM_758497.1	1689	1523.17	163.886	7.82109
XM_758498.1	1536	1335.46	115.114	6.26564
XM_758499.1	579	296.446	1066	261.386
XM_758500.1	3656	2886.97	10267	258.508
XM_758501.1	305	86.113	342	288.688
XM_758502.1	1950	1415	3101	159.301
XM_758503.1	306	86.6314	353	296.19
XM_758504.1	1638	1401.34	5302	275.023
XM_758505.1	285	75.5406	290	279.055
XM_758506.1	1883	1371.05	2700	143.147
XM_758507.1	1650	1305.79	167	9.2964
XM_758508.1	2862	2396.03	3100	94.0461
XM_758509.1	465	218.886	1567	520.383
XM_758510.1	973	624.452	3305	384.719
XM_758511.1	1548	1325.57	4306	236.125
XM_758512.1	678	443.882	4381	717.427
XM_758513.1	1074	801.978	4459	404.153
XM_758514.1	1380	1160.57	1789	112.05
XM_758515.1	1374	1181.62	1045	64.2849
XM_758516.1	924	552.268	201	26.4556
XM_758517.1	918	530.146	427	58.5469
XM_758518.1	744	391.148	686	127.484
XM_758519.1	372	133.627	93	50.5894
XM_758520.1	513	265.718	580	158.664
XM_758521.1	1209	833.31	465	40.5619
XM_758522.1	1693	1413.7	5454	280.434
XM_758523.1	423	179.063	85	34.5052
XM_758524.1	411	167.999	121	52.3541
XM_758525.1	4743	3563.98	7494	152.844
XM_758526.1	5367	4280.13	15490	263.067
XM_758527.1	876	586.625	3889	481.891
XM_758528.1	1420	1182.31	9297	571.586
XM_758529.1	1330	1078.36	4252	286.617
XM_758530.1	897	494.781	528	77.5698
XM_758531.1	582	334.087	525	114.228
XM_758532.1	4530	3732.02	591	11.5111
XM_758533.1	1419	1157.45	1890	118.695
XM_758534.1	372	133.627	809	440.073
XM_758535.1	405	162.574	58	25.9328
XM_758536.1	1104	755.303	1087	104.612
XM_758537.1	915	716.45	12549	1273.19
XM_758538.1	461	215.017	1824	616.629
XM_758539.1	448	202.563	2662	955.258
XM_758540.1	441	196.006	873	323.755
XM_758541.1	492	245.102	998	295.975
XM_758542.1	1500	1025	3720	263.811
XM_758543.1	3471	2843.07	3501	89.511
XM_758544.1	504	256.876	1436	406.353
XM_758545.1	770	490.51	1387	205.542
XM_758546.1	423	179.063	922	374.28
XM_758547.1	1968	1808.35	2750	110.54
XM_758548.1	2487	1973.13	3923	144.522
XM_758549.1	1347	898.432	257.116	20.8025
XM_758550.1	1410	994.811	1000.22	73.0848
XM_758551.1	1680	1296.51	308.394	17.2902
XM_758552.1	1437	1063.79	173.637	11.8648
XM_758553.1	621	302.577	71.8383	17.2581
XM_758554.1	1320	1000.54	162	11.7694
XM_758555.1	1884	1551	336	15.747
XM_758556.1	1740	1371.41	108	5.72439
XM_758557.1	1527	1236.29	1550	91.1347
XM_758558.1	1356	946.262	1083	83.1934
XM_758559.1	1194	813.121	197	17.6109
XM_758560.1	1146	714.808	292	29.6938
XM_758561.1	1310	933.542	108	8.40933
XM_758562.1	1857	1334.83	840	45.7429
XM_758563.1	4542	3629.89	2500.89	50.0809
XM_758564.1	3300	2327.54	663	20.7056
XM_758565.1	2010	1470.17	1444	71.3953
XM_758566.1	900	511.371	183	26.0128
XM_758567.1	726	384.498	2202	416.289
XM_758568.1	1689	1140.91	928	59.1243
XM_758569.1	2910	2446.52	2735	81.2606
XM_758570.1	1689	1133.1	146	9.36602
XM_758571.1	2106	1693.71	1555	66.7364
XM_758572.1	2967	2158.7	2517	84.7546
XM_758573.1	1191	945.185	2290	176.112
XM_758574.1	711	413.868	855	150.167
XM_758575.1	1305	998.303	593	43.1782
XM_758576.1	753	469.418	886	137.197
XM_758577.1	1199	1016.06	1337	95.6498
XM_758578.1	955	722.886	4607	463.255
XM_758579.1	382	142.326	289	147.6
XM_758580.1	763	400.906	340	61.6464
XM_758581.1	2301	2039.13	2393	85.3039
XM_758582.1	731	427.608	938	159.452
XM_758583.1	828	497.858	612	89.3548
XM_758584.1	1084	708.247	543	55.7297
XM_758585.1	648	388.517	641	119.928
XM_758586.1	3258	2812.05	3386	87.5256
XM_758587.1	741	419.296	719	124.646
XM_758588.1	761	467.154	800	124.48
XM_758590.1	1374	1093.55	3230	214.702
XM_758591.1	534	252.125	489	140.982
XM_758592.1	534	272.164	6911	1845.78
XM_758593.1	1443	1322.66	43632	2397.89
XM_758594.1	650	319.278	297	67.6174
XM_758595.1	459	213.082	137	46.7354
XM_758596.1	1812	1263.91	968	55.671
XM_758597.1	1206	931.855	845	65.9144
XM_758598.1	282	73.9852	366	359.59
XM_758599.1	2771	2388.46	3888	118.326
XM_758600.1	1386	1077.18	92	6.20827
XM_758601.1	672	427.633	2990	508.243
XM_758602.1	602	280.8	633	163.862
XM_758603.1	735	423.712	603	103.447
XM_758604.1	603	320.193	481	109.195
XM_758605.1	1251	955.236	1505	114.524
XM_758606.1	1571	1075.13	2199	148.675
XM_758607.1	1464	992.008	1047	76.719
XM_758608.1	1971	1900.88	11577	442.704
XM_758609.1	3591	3016.65	2838	68.3848
XM_758610.1	702	361.18	669	134.64
XM_758611.1	687	386.149	620	116.71
XM_758612.1	219	51.38	216	305.584
XM_758613.1	465	218.886	4545	1509.34
XM_758614.1	2895	2582.6	2773	78.0485
XM_758615.1	1140	892.9	1573	128.055
XM_758616.1	858	619.576	1173	137.618
XM_758617.1	2183	1909.24	3037	115.626
XM_758618.1	447	201.603	2286	824.233
XM_758619.1	168	36.5755	81	160.978
XM_758620.1	1104	958.262	1474	111.811
XM_758621.1	1237	931.46	1842	143.746
XM_758622.1	2358	1936.04	2695	101.185
XM_758623.1	2808	2522.78	3806	109.663
XM_758624.1	624	393.61	1487	274.61
XM_758625.1	786	596.179	586	71.4484
XM_758626.1	2172	1737.39	9	0.376544
XM_758627.1	597	343.993	6	1.26787
XM_758628.1	651	382.325	14	2.66175
XM_758629.1	1071	768.934	30	2.83598
XM_758630.1	2538	2306.08	4574	144.176
XM_758631.1	1695	1583.08	5694	261.449
XM_758632.1	753	544.724	2854	380.845
XM_758633.1	1107	868.356	4553	381.129
XM_758634.1	330	101.783	388	277.095
XM_758635.1	1344	1341.5	7077	383.468
XM_758636.1	399	157.464	1885	870.164
XM_758637.1	669	452.553	27	4.33676
XM_758638.1	867	604.714	37	4.44757
XM_758639.1	924	702.146	26	2.69164
XM_758640.1	807	462.709	94	14.767
XM_758641.1	867	557.249	499.451	65.1501
XM_758642.1	822	604.831	114	13.7007
XM_758643.1	1080	808.664	22	1.97754
XM_758644.1	729	457.072	22	3.49872
XM_758645.1	855	664.311	27	2.95436
XM_758646.1	447	201.603	49	17.6673
XM_758647.1	1329	1421.35	2749	140.587
XM_758648.1	2187	1976.93	1642	60.3745
XM_758649.1	880	585.395	1368	169.867
XM_758650.1	468	221.775	1232	403.803
XM_758651.1	357	121.291	422	252.904
XM_758652.1	504	353.966	2608	535.571
XM_758653.1	1191	932.702	2698	210.267
XM_758654.1	1455	1112.84	2332	152.324
XM_758655.1	982	659.183	1877	206.981
XM_758656.1	597	393.214	350	64.701
XM_758657.1	711	468.501	181	28.0827
XM_758658.1	1197	1023.48	161	11.4346
XM_758659.1	1113	895.327	846.998	68.7658
XM_758660.1	1021	723.763	1151	115.598
XM_758661.1	1065	806.48	4164	375.309
XM_758662.1	1185	998.215	3731	271.689
XM_758663.1	345	112.474	1160	749.684
XM_758664.1	1386	1352.11	275	14.784
XM_758665.1	213	49.7944	20	29.1958
XM_758666.1	1434	1352.12	4851	260.788
XM_758667.1	894	730.387	4873	484.97
XM_758668.1	1827	1383.59	15	0.788054
XM_758669.1	1991	1554.72	2149.6	100.502
XM_758670.1	1764	1331.43	75	4.09462
XM_758671.1	1383	1100.66	6466	427.028
XM_758672.1	534	265.528	307	84.0426
XM_758673.1	444	198.846	257	93.948
XM_758674.1	357	121.291	400	239.719
XM_758675.1	510	262.771	346	95.7128
XM_758676.1	924	585.778	361	44.7967
XM_758677.1	1128	785.635	33	3.05327
XM_758678.1	702	411.854	4	0.705973
XM_758679.1	1578	1299.7	1542	86.2408
XM_758680.1	1242	936.703	1301	100.959
XM_758681.1	1536	1236.31	1668	98.071
XM_758682.1	6273	5707.2	3633	46.2715
XM_758683.1	1848	1419.39	1979	101.348
XM_758684.1	481	234.271	3623	1124.14
XM_758685.1	453	207.336	347	121.654
XM_758686.1	1113	742.604	398	38.9581
XM_758687.1	3915	3896.25	53.309	0.994547
XM_758688.1	930	549.514	426	56.3511
XM_758689.1	1653	1319.41	1297	71.4549
XM_758690.1	1001	649.48	393	43.9844
XM_758691.1	1131	681.454	1438	153.389
XM_758692.1	564	381.462	248	47.2577
XM_758693.1	987	682.654	1204	128.203
XM_758694.1	1296	975.547	1933	144.031
XM_758695.1	7311	5334.15	7364	100.351
XM_758696.1	542	294.3	738	182.279
XM_758697.1	477	230.457	105	33.1185
XM_758698.1	1209	880.284	928	76.6297
XM_758699.1	1518	1047.71	429	29.7639
XM_758700.1	1701	1219.85	1039	61.913
XM_758701.1	1617	1237.77	3380	198.494
XM_758702.1	260	64.8512	726	813.749
XM_758703.1	557	309.087	959	225.533
XM_758704.1	351	116.839	2876	1789.26
XM_758705.1	627	333.328	548	119.503
XM_758706.1	1545	1214.76	789	47.2128
XM_758707.1	2127	1768.71	4200	172.61
XM_758708.1	3087	2661.96	5259	143.606
XM_758709.1	873	554.094	177	23.22
XM_758710.1	726	410.328	160	28.344
XM_758711.1	1235	778.347	714	66.6802
XM_758712.1	1041	682.302	60	6.39214
XM_758713.1	973	523.716	1144	158.782
XM_758714.1	2739	2338.24	1005	31.2426
XM_758715.1	1314	1022.26	1432	101.825
XM_758716.1	2958	2533.79	7304	209.537
XM_758717.1	3561	3604.3	9417	189.917
XM_758718.1	720	357.664	900.652	183.043
XM_758719.1	999	581.269	782.348	97.835
XM_758720.1	1440	1170.07	6	0.372745
XM_758721.1	1095	801.925	5202	471.529
XM_758722.1	237	56.6562	593	760.814
XM_758723.1	204	46.9904	148	228.942
XM_758724.1	3696	3541.74	5127	105.225
XM_758725.1	1905	1464.25	496	24.6228
XM_758726.1	1791	1298.7	468	26.1944
XM_758727.1	2427	1592.86	1866	85.154
XM_758728.1	750	461.857	196	30.8475
XM_758729.1	1158	1039.79	1809	126.464
XM_758730.1	600	290.033	204	51.1274
XM_758731.1	776	427.712	392	66.6203
XM_758732.1	225	53.1553	84	114.869
XM_758733.1	846	530.277	188	25.7707
XM_758734.1	333	103.947	142	99.2995
XM_758735.1	1068	733.109	472	46.7999
XM_758736.1	1077	885.868	1435	117.748
XM_758737.1	783	523.689	849	117.843
XM_758738.1	1395	1267.49	1103	63.256
XM_758739.1	522	274.501	378	100.096
XM_758740.1	567	271.451	78	20.887
XM_758741.1	858	627.767	55	6.36848
XM_758742.1	594	328.765	505	111.655
XM_758743.1	989	741.144	1774	173.989
XM_758744.1	704	428.365	337	57.1856
XM_758745.1	351	116.839	219	136.247
XM_758746.1	1413	1111.96	1139	74.4571
XM_758747.1	1881	1606.75	795	35.966
XM_758748.1	2108	1615.48	573	25.7825
XM_758749.1	591	294.443	313	77.2706
XM_758750.1	306	86.6314	488	409.464
XM_758751.1	4308	4167.54	696	12.1395
XM_758752.1	1155	779.13	704	65.6802
XM_758753.1	3741	3330.05	340	7.42164
XM_758754.1	813	562.049	66	8.53574
XM_758755.1	2773	2356.88	3077	94.8992
XM_758756.1	4116	3258.97	5154	114.957
XM_758757.1	846	569.975	1170	149.211
XM_758758.1	3264	2938.3	7880	194.941
XM_758759.1	431	186.506	1621	631.772
XM_758760.1	2916	2629.48	7727	213.606
XM_758761.1	2046	2314.33	7167	225.104
XM_758762.1	1305	931.58	2153	167.995
XM_758763.1	549	273.064	11	2.92819
XM_758764.1	1401	1178.68	1284	79.1846
XM_758765.1	147	29.9396	175	424.878
XM_758766.1	1299	947.242	1813	139.126
XM_758767.1	488	241.151	577	173.924
XM_758768.1	2382	1751.7	1555	64.5273
XM_758769.1	5148	4765.54	3413	52.059
XM_758770.1	2766	2475.25	404	11.8641
XM_758771.1	1479	1213.4	1746	104.595
XM_758772.1	1046	978.244	5290	393.079
XM_758773.1	3429	2897.16	400	10.036
XM_758774.1	2655	2119.79	1227	42.0749
XM_758775.1	1008	834.816	1321	115.023
XM_758776.1	1089	848.938	617	52.83
XM_758777.1	597	359.452	837	169.261
XM_758778.1	938	638.139	1600	182.254
XM_758779.1	634	356.305	432	88.1321
XM_758780.1	348	114.649	2500	1585.05
XM_758781.1	1222	1110.72	4858	317.925
XM_758782.1	984	644.799	364	41.0344
XM_758783.1	4290	4695.32	8431	130.523
XM_758784.1	1164	915.779	1636	129.857
XM_758785.1	1087	791.862	1819	166.976
XM_758786.1	1494	1432.34	2226	112.967
XM_758787.1	2451	2385.88	794	24.1904
XM_758788.1	2202	1898.79	134	5.12979
XM_758789.1	2592	2185.71	16	0.532108
XM_758790.1	1698	1474.85	3921	193.25
XM_758791.1	1035	895.026	1741	141.395
XM_758792.1	627	389.11	1048	195.776
XM_758793.1	2067	1919.06	4647	176.017
XM_758794.1	1950	1432	2596.65	131.808
XM_758795.1	1407	1204.29	1830	110.456
XM_758796.1	663	402.314	152	27.4631
XM_758797.1	2070	1768.25	2118	87.067
XM_758798.1	1515	1444.1	1503	75.6543
XM_758799.1	1031	763.344	2740.08	260.925
XM_758800.1	2916	2726.06	6989.92	186.384
XM_758801.1	414	170.739	717	305.252
XM_758802.1	2898	2759.01	4475	117.899
XM_758803.1	1149	779.18	2350	219.231
XM_758804.1	276	71.2957	41	41.8015
XM_758805.1	2748	2995.78	10937	265.375
XM_758806.1	1668	1692.52	2745	117.891
XM_758807.1	2235	2175.07	1854	61.9596
XM_758808.1	763	428.71	3013	510.866
XM_758809.1	1020	893.171	717	58.3521
XM_758810.1	2419	2338.64	10727	333.416
XM_758811.1	714	595.923	511	62.3307
XM_758812.1	1686	1884.23	4137	159.597
XM_758813.1	726	498.531	642	93.6083
XM_758814.1	1599	1352.64	874	46.968
XM_758815.1	1065	1006.91	577	41.6539
XM_758816.1	393	152.07	116	55.4481
XM_758817.1	7218	6401.89	1719	19.5182
XM_758818.1	852	591.908	255	31.3154
XM_758819.1	606	339.644	2752	588.973
XM_758820.1	846	466.891	619.972	96.5224
XM_758821.1	882	484.795	681.028	102.112
XM_758822.1	3394	2699.18	1775	47.8011
XM_758823.1	306	86.6314	833	698.942
XM_758824.1	686	357.216	3238	658.897
XM_758825.1	621	372.394	283	55.2402
XM_758826.1	1290	955.926	1532	116.495
XM_758827.1	1432	1227.32	2035	120.525
XM_758828.1	1110	745.866	587	57.2069
XM_758829.1	3606	3068.48	2939	69.6222
XM_758830.1	1112	983.704	11425	844.235
XM_758831.1	720	442.495	2510	412.322
XM_758832.1	1294	1038.79	1558	109.022
XM_758833.1	717	655.628	2480	274.958
XM_758834.1	1173	835.307	2467	214.682
XM_758835.1	1281	1048.62	1037	71.8842
XM_758836.1	1269	959.753	520	39.3836
XM_758837.1	2343	2360.98	7498	230.848
XM_758838.1	117	21.7827	167	557.283
XM_758839.1	2784	2518.38	4315	124.546
XM_758840.1	330	101.783	311	222.105
XM_758841.1	537	267.068	567	154.324
XM_758842.1	1398	1109.36	1047	68.6034
XM_758843.1	522	274.501	769	203.635
XM_758844.1	1419	1114.17	1942	126.697
XM_758845.1	557	283.316	2218	569.066
XM_758846.1	168	36.5755	468	930.096
XM_758847.1	2796	2616.61	1009	28.0301
XM_758848.1	1659	1572.33	875	40.4517
XM_758849.1	1062	710.986	2224	227.376
XM_758850.1	587	313.593	1043	241.763
XM_758851.1	763	466.43	4550	709.082
XM_758852.1	1377	978.222	497	36.931
XM_758853.1	2565	2300.78	5073	160.274
XM_758854.1	423	179.063	889	360.884
XM_758855.1	879	690.715	1882	198.058
XM_758856.1	717	470.065	25	3.86592
XM_758857.1	667	480.237	1427	215.993
XM_758858.1	2328	2075.53	39109	1369.68
XM_758859.1	719	537.916	2034	274.858
XM_758860.1	1074	907.318	1694	135.714
XM_758861.1	783	588.246	1005	124.188
XM_758862.1	378	138.913	651	340.651
XM_758863.1	411	167.999	189956	82189.9
XM_758864.1	384	144.117	122130	61599.6
XM_758865.1	2649	2329.88	2568	80.1186
XM_758866.1	795	566.255	1404	180.23
XM_758867.1	1164	962.744	891	67.2726
XM_758868.1	861	649.521	217	24.285
XM_758869.1	1524	1159.74	23	1.44158
XM_758870.1	2439	1978.33	32	1.17577
XM_758871.1	1431	1106.12	1829	120.194
XM_758872.1	1914	1405.64	1484	76.7419
XM_758873.1	363	126.431	335	192.602
XM_758874.1	480	233.318	730	227.429
XM_758875.1	765	457.798	964	153.065
XM_758876.1	3708	3524.08	3230	66.6237
XM_758877.1	1326	1013.67	10	0.717094
XM_758878.1	294	80.1894	3	2.71942
XM_758879.1	1497	1119.29	21	1.3638
XM_758880.1	758	444.593	433	70.794
XM_758881.1	1935	1566.8	114	5.28888
XM_758882.1	3573	3675.56	4746	93.8589
XM_758883.1	922	645.812	3796	427.259
XM_758884.1	960	746.764	1286	125.178
XM_758885.1	1650	1571.77	1476	68.2606
XM_758886.1	3672	2966.19	2850	69.8421
XM_758887.1	1449	1100.71	2688	177.512
XM_758888.1	768	471.151	193	29.7762
XM_758889.1	368	130.395	514	286.533
XM_758890.1	1815	1533.93	1298	61.5094
XM_758891.1	732	362.136	13	2.60942
XM_758892.1	553	251.313	846	244.696
XM_758893.1	744	481.355	619	93.4752
XM_758894.1	2151	1713.74	163	6.91376
XM_758895.1	1992	1460.35	998	49.6759
XM_758896.1	6399	5155.94	1973	27.8157
XM_758897.1	1314	832.108	730	63.7698
XM_758898.1	780	477.113	434	66.1212
XM_758899.1	1572	1373.92	2310	122.215
XM_758900.1	1049	690.175	1263	133.02
XM_758901.1	3331	2767.51	2531	66.4775
XM_758902.1	1227	1029.9	575	40.5831
XM_758903.1	1011	752.451	837	80.8573
XM_758904.1	1737	1438.32	728	36.7914
XM_758905.1	3372	3722.46	13167	257.115
XM_758906.1	3210	2750.92	2753	72.7445
XM_758907.1	2304	1850.92	1475	57.9262
XM_758908.1	831	638.965	1622	184.521
XM_758909.1	1284	1031.7	1382	97.37
XM_758910.1	948	750.852	1264	122.367
XM_758911.1	2877	2609.42	2356	65.6301
XM_758912.1	5181	4485.22	4596	74.4847
XM_758913.1	618	330.263	411	90.4594
XM_758914.1	1800	1478.04	1555	76.4741
XM_758915.1	1689	1581.33	2288	105.173
XM_758916.1	1118	810.159	2788	250.146
XM_758917.1	921	743.198	333	32.5695
XM_758918.1	870	608.505	1058	126.384
XM_758919.1	3678	3029.41	3394	81.4376
XM_758921.1	585	337.054	313	67.502
XM_758922.1	1044	825.961	1553	136.673
XM_758923.1	1357	922.004	1639	129.216
XM_758924.1	1467	1168.94	1985	123.436
XM_758925.1	1185	1258.18	30999	1790.91
XM_758926.1	1191	1042.58	5032	350.833
XM_758927.1	780	619.406	1149	134.839
XM_758928.1	771	485.239	437	65.4632
XM_758929.1	684	462.086	3506	551.519
XM_758930.1	3522	2762.23	467	12.2894
XM_758931.1	1890	1593.39	3589	163.728
XM_758932.1	519	271.584	112	29.9768
XM_758933.1	537	261.228	264	73.4608
XM_758934.1	372	133.627	155	84.3156
XM_758935.1	738	606.496	2487	298.071
XM_758936.1	524	276.501	2691	707.437
XM_758937.1	1263	972.547	1934	144.55
XM_758938.1	1567	1268.46	2728	156.329
XM_758939.1	1131	902.282	1368	110.209
XM_758940.1	3957	3503.18	5251	108.956
XM_758941.1	1074	854.508	183	15.5671
XM_758942.1	2184	1899	2024	77.4741
XM_758943.1	465	218.886	367	121.877
XM_758944.1	2025	1900.31	2688	102.82
XM_758945.1	829	565.918	760	97.6185
XM_758946.1	428	183.694	157699	62402.9
XM_758947.1	2157	2055.78	1931	68.2773
XM_758948.1	904	612.036	1538	182.663
XM_758949.1	1440	1004.21	17	1.23054
XM_758950.1	699	391.918	6	1.11283
XM_758951.1	3741	3579.17	4725	95.9601
XM_758952.1	1683	1399.81	5133	266.546
XM_758953.1	237	56.6562	106	135.997
XM_758954.1	678	460.979	548	86.4113
XM_758955.1	708	508.211	1176	168.203
XM_758956.1	2307	2162.57	2048	68.8385
XM_758957.1	873	632.627	1221	140.294
XM_758958.1	1503	1268.23	3202	183.525
XM_758959.1	1905	1731.1	306	12.849
XM_758960.1	225	53.1553	35	47.8623
XM_758961.1	444	198.846	112	40.9423
XM_758962.1	1671	1343.85	164	8.87082
XM_758963.1	844	678.523	3500	374.952
XM_758964.1	390	149.445	523	254.386
XM_758965.1	2397	2745.3	1191	31.535
XM_758966.1	3123	3128.22	8259	191.912
XM_758967.1	1308	1106	81	5.32356
XM_758968.1	2706	2504.55	10768	312.52
XM_758969.1	2634	2211.6	544	17.8799
XM_758970.1	1239	1216.01	678	40.5287
XM_758971.1	354	119.148	106	64.6684
XM_758972.1	537	289.388	581	145.938
XM_758973.1	1806	1404.15	1667	86.2968
XM_758974.1	1833	1411.1	1458	75.1055
XM_758975.1	1398	872.753	761	63.3818
XM_758976.1	1149	935.76	1070	83.1172
XM_758977.1	5415	4904.74	2980	44.1643
XM_758978.1	1320	1100.29	1705	112.639
XM_758979.1	2775	2539.83	12373	354.114
XM_758980.1	1704	1274.87	393.286	22.424
XM_758981.1	1781	1461.24	5845.71	290.795
XM_758982.1	2232	1916.44	3912	148.38
XM_758983.1	1476	1448.84	3004	150.713
XM_758984.1	1404	1054.23	737	50.8164
XM_758985.1	1362	1076.47	1535	103.652
XM_758986.1	906	618.844	1717	201.679
XM_758987.1	960	690.755	7	0.736623
XM_758988.1	1044	793.323	6	0.549759
XM_758989.1	1036	731.393	1078	107.137
XM_758990.1	2406	2097.05	725	25.1305
XM_758991.1	1206	888.322	412	33.7131
XM_758992.1	1026	616.635	288	33.9497
XM_758993.1	387	146.829	348	172.281
XM_758994.1	165	35.7668	372	756.023
XM_758995.1	978	641.53	1509	170.979
XM_758996.1	3036	2955.77	3027	74.4412
XM_758997.1	1671	1485.69	27	1.32101
XM_758998.1	879	690.684	147	15.4707
XM_758999.1	1378	1180.05	1009	62.1532
XM_759000.1	2172	1573.48	746	34.4628
XM_759001.1	2055	1942.6	587	21.9648
XM_759002.1	1824	1708.38	1288	54.8029
XM_759003.1	1385	1162.95	3662	228.891
XM_759004.1	1800	1459.68	2373	118.171
XM_759005.1	2103	1775.15	3859	158.02
XM_759006.1	753	510.684	1469	209.094
XM_759007.1	1224	1005.81	724	52.3231
XM_759008.1	504	256.876	314	88.8543
XM_759009.1	549	274.112	410	108.724
XM_759010.1	2430	1940.37	1431	53.6077
XM_759011.1	345	112.474	274	177.081
XM_759012.1	2127	1564.28	1161	53.9497
XM_759013.1	279	72.6051	330	330.384
XM_759014.1	2604	2210.47	838	27.5569
XM_759015.1	3663	2990.96	1489	36.1873
XM_759016.1	1984	1554.81	2230	104.255
XM_759017.1	1238	912.123	932	74.2736
XM_759018.1	150	30.6918	214	506.831
XM_759019.1	2350	1992.07	3722	135.814
XM_759020.1	3327	2898.21	1142	28.6423
XM_759021.1	546	298.3	4	0.974715
XM_759022.1	444	198.846	2	0.731113
XM_759023.1	464	217.908	1856	619.123
XM_759024.1	1838	1453.42	1625	81.2707
XM_759025.1	3087	2462.34	1451	42.8343
XM_759026.1	1734	1663.96	5042	220.257
XM_759027.1	2907	2582.37	2923	82.2778
XM_759028.1	552	304.21	134	32.0186
XM_759029.1	1308	992.673	3093	226.488
XM_759030.1	558	279.875	281	72.9817
XM_759031.1	261	65.2599	100	111.385
XM_759032.1	315	91.9288	70	55.35
XM_759033.1	633	353.171	391	80.4754
XM_759034.1	1311	1127.32	5346	344.708
XM_759035.1	916	605.477	3788	454.762
XM_759036.1	2043	1906.29	2900	110.581
XM_759037.1	1788	1294.76	1249	70.1202
XM_759038.1	1548	1231.39	1233	72.7845
XM_759039.1	1111	750.839	1052	101.845
XM_759040.1	420	176.316	32	13.1926
XM_759041.1	603	332.669	61	13.3287
XM_759042.1	3279	2488.95	2826	82.533
XM_759043.1	3135	2698.41	1096	29.5239
XM_759044.1	2293	1766.7	3040	125.078
XM_759045.1	791	382.848	171	32.4669
XM_759046.1	1678	1308.96	2491	138.331
XM_759047.1	225	53.1553	122	166.834
XM_759048.1	2433	1694.69	932	39.9757
XM_759049.1	4686	3714.53	3867	75.6731
XM_759050.1	1599	1234.39	1151	67.7788
XM_759051.1	1032	666.871	1261	137.45
XM_759052.1	1662	1402.51	1914	99.199
XM_759053.1	531	283.445	187	47.9562
XM_759054.1	1137	717.324	451	45.7018
XM_759055.1	432	187.412	174	67.4876
XM_759056.1	1620	1356.63	2845	152.438
XM_759057.1	930	593.762	1213	148.498
XM_759058.1	327	99.8546	804	585.274
XM_759059.1	948	555.944	641	83.8105
XM_759060.1	3351	2968.8	3021	73.9675
XM_759061.1	3324	2796.66	4386	113.999
XM_759062.1	2917	2431.03	3448	103.098
XM_759063.1	707	420.584	287	49.6022
XM_759064.1	2070	1669.55	2919	127.088
XM_759065.1	5478	4195.43	6935	120.155
XM_759066.1	2355	1689.01	2032	87.4506
XM_759067.1	1251	910.717	519	41.4243
XM_759068.1	966	735.914	3245	320.523
XM_759069.1	1143	855.947	693	58.8515
XM_759070.1	2262	1974.41	1524	56.1074
XM_759071.1	327	99.8546	332	241.68
XM_759072.1	2508	2143.6	2899	98.3052
XM_759073.1	249	60.6341	142	170.233
XM_759074.1	621	339.305	596	127.681
XM_759075.1	774	474.811	656	100.428
XM_759076.1	475	228.457	170	54.0898
XM_759077.1	1083	872.949	254	21.1503
XM_759078.1	2910	2357.75	1052	32.4332
XM_759079.1	1681	1231.92	2475	146.038
XM_759080.1	936	703.706	1183	122.198
XM_759081.1	243	58.5491	52	64.5587
XM_759082.1	1461	1273.34	1902	108.577
XM_759083.1	3633	3286.61	6116	135.267
XM_759084.1	596	377.142	1676	323.029
XM_759085.1	105	19.5261	238	885.998
XM_759086.1	3003	2296.73	555	17.5653
XM_759087.1	630	363.477	728	145.588
XM_759088.1	828	473.576	887	136.146
XM_759089.1	309	88.2177	218	179.627
XM_759090.1	1131	836.007	1145	99.5559
XM_759091.1	2082	1866.46	5236	203.916
XM_759092.1	1039	713.37	1587	161.709
XM_759093.1	1335	998.476	1330	96.8245
XM_759094.1	1103	672.349	906	97.9502
XM_759095.1	871	588.047	506	62.5475
XM_759096.1	405	162.574	203	90.7647
XM_759097.1	372	133.627	102	55.4851
XM_759098.1	2640	2118	1175	40.3259
XM_759099.1	4851	4199.45	1421	24.5965
XM_759100.1	678	376.387	66	12.7462
XM_759101.1	323	96.911	119	89.2576
XM_759102.1	1098	843.252	1924	165.851
XM_759103.1	1748	1414.56	6050	310.89
XM_759104.1	1908	1930.32	5955	224.245
XM_759105.1	1315	1148.91	7985	505.196
XM_759106.1	135	27.1217	46	123.285
XM_759107.1	534	363.719	197	39.3706
XM_759108.1	582	293.322	1767	437.888
XM_759109.1	659	419.364	1035	179.399
XM_759110.1	606	300.066	884	214.145
XM_759111.1	1351	1172.95	774	47.966
XM_759112.1	303	84.9214	585	500.738
XM_759113.1	2193	2315.55	1702	53.4289
XM_759114.1	2463	2068.63	3230	113.499
XM_759115.1	4149	4057.74	2612	46.7908
XM_759116.1	2280	2175.95	4293	143.411
XM_759117.1	1272	1029.35	857	60.5189
XM_759118.1	1344	1082.55	1321.46	88.7318
XM_759119.1	1166	908.038	2791.54	223.466
XM_759120.1	1860	1682.59	1888	81.5632
XM_759121.1	812	450.111	648	104.647
XM_759122.1	1942	1860.21	10113	395.174
XM_759124.1	225	53.1553	9	12.3074
XM_759125.1	144	28.9431	8	20.0917
XM_759126.1	216	50.7437	6	8.5949
XM_759127.1	261	65.2599	111	123.637
XM_759128.1	1245	1028.95	1250	88.3052
XM_759129.1	1686	1541.66	1982	93.4515
XM_759130.1	2253	2229.37	12205	397.949
XM_759131.1	414	170.739	306	130.275
XM_759132.1	3747	3102.48	27	0.632596
XM_759133.1	792	527.239	18	2.48163
XM_759134.1	3477	2961.74	5887	144.483
XM_759135.1	798	555.86	474	61.9847
XM_759136.1	2262	1698.56	1943	83.1503
XM_759137.1	5325	4581.26	6518	103.419
XM_759138.1	561	313.087	246	57.1138
XM_759139.1	273	69.907	258	268.269
XM_759140.1	996	688.822	7	0.73869
XM_759141.1	648	377.326	3	0.577931
XM_759142.1	2253	1531.82	1333	63.2549
XM_759143.1	510	262.771	298	82.4347
XM_759144.1	1230	893.988	73	5.93558
XM_759145.1	1169	721.373	917	92.402
XM_759146.1	939	600.391	950	115.017
XM_759147.1	1248	819.863	751	66.584
XM_759148.1	1182	858.735	351	29.7112
XM_759149.1	1662	1518.26	11415	546.513
XM_759150.1	1035	760.924	643	61.4244
XM_759151.1	2766	2459.03	2781	82.2071
XM_759152.1	743	423.622	558.088	95.7627
XM_759153.1	2192	1805.04	2516.91	101.357
XM_759154.1	1350	1056.1	2179	149.976
XM_759155.1	357	121.291	384	230.131
XM_759156.1	6081	6207.19	16464	192.802
XM_759157.1	822	638.845	537	61.1013
XM_759158.1	529	281.501	6455	1666.81
XM_759159.1	823	466.402	1458	227.232
XM_759160.1	755	496.824	917	134.165
XM_759161.1	1770	1445.08	2089	105.079
XM_759162.1	1380	1161.3	6219	389.268
XM_759163.1	2517	2247.44	2382	77.0415
XM_759164.1	1554	1331.58	2411	131.614
XM_759165.1	739	481.13	553	83.5476
XM_759166.1	983	618.753	910	106.904
XM_759167.1	318	93.6009	174	135.127
XM_759168.1	681	406.496	426	76.1772
XM_759169.1	1113	776.252	170	15.9191
XM_759170.1	1956	1514.64	245	11.7579
XM_759171.1	648	356.192	210	42.8555
XM_759172.1	1103	687.446	719	76.026
XM_759173.1	1185	853.62	790	67.272
XM_759174.1	3582	2951.44	1743	42.9274
XM_759175.1	582	285.398	586	149.252
XM_759176.1	654	297.53	322	78.6677
XM_759177.1	462	216.017	707	237.905
XM_759178.1	574	261.622	503	139.754
XM_759179.1	1539	1056.47	1467	100.936
XM_759180.1	331	102.455	368	261.089
XM_759181.1	2277	1913.67	1342	50.975
XM_759182.1	153	31.66	315	723.22
XM_759183.1	975	783.052	2481	230.307
XM_759184.1	1011	730.369	307	30.554
XM_759185.1	1533	1333.66	1195	65.1318
XM_759186.1	660	376.409	460	88.832
XM_759187.1	2618	2346.03	7848	243.163
XM_759188.1	2742	2480.29	6983	204.65
XM_759189.1	2370	2105.2	2486	85.838
XM_759190.1	4854	4712.54	3453	53.2615
XM_759191.1	1761	1504.09	2036	98.3957
XM_759192.1	903	569.584	1644	209.805
XM_759193.1	1518	1024.92	3048	216.171
XM_759194.1	400	158.366	264	121.175
XM_759195.1	2202	1741.09	1007	42.0416
XM_759196.1	1555	1131.05	592	38.0463
XM_759197.1	1776	1176.79	48	2.96493
XM_759198.1	1503	1174.02	1655	102.469
XM_759199.1	1578	1226.37	103	6.10503
XM_759200.1	1515	1173.61	450	27.8716
XM_759201.1	2142	1957.24	1741	64.6584
XM_759202.1	1289	955.76	2267	172.415
XM_759203.1	1031	860.32	1253	105.867
XM_759204.1	1542	1369.82	1639	86.9734
XM_759205.1	966	679.029	4761	509.661
XM_759206.1	1305	1051.93	1437	99.298
XM_759207.1	2865	2522.57	1684	48.5256
XM_759208.1	11787	11226.1	14475	93.7266
XM_759209.1	1709	1454.54	1244	62.168
XM_759210.1	1401	1110.56	392	25.6577
XM_759211.1	1225	884.344	3202	263.191
XM_759212.1	461	215.017	356	120.351
XM_759213.1	1233	1032.1	926	65.2173
XM_759214.1	732	448.637	964	156.19
XM_759215.1	1647	1172.28	3634	225.334
XM_759216.1	195	44.1741	14	23.0373
XM_759217.1	216	50.7437	43	61.5968
XM_759218.1	312	89.994	73421.5	59303.7
XM_759219.1	780	447.047	468	76.0964
XM_759220.1	312	89.994	73421.5	59303.7
XM_759221.1	1542	1506.27	832	40.1506
XM_759222.1	576	276.596	792	208.138
XM_759223.1	920	755.117	4056	390.441
XM_759224.1	1058	715.527	1259	127.9
XM_759225.1	2136	1481.13	1705	83.6761
XM_759226.1	1968	2026.42	15209	545.56
XM_759228.1	273	69.907	660	686.27
XM_759229.1	510	262.771	1378	381.191
XM_759230.1	1176	906.807	1016	81.4423
XM_759231.1	1530	1223.9	1354	80.4166
XM_759232.1	1026	762.334	1516	144.552
XM_759233.1	951	779.961	5997	558.898
XM_759234.1	1137	921.104	1731	136.603
XM_759235.1	4137	4100.1	3628	64.3198
XM_759236.1	666	379.898	299	57.2105
XM_759237.1	168	36.5755	212	421.325
XM_759238.1	2442	2183.72	3078	102.457
XM_759239.1	1665	1390.99	2522	131.793
XM_759240.1	1788	1492.72	688	33.5028
XM_759241.1	375	136.202	317	169.18
XM_759242.1	773	456.943	832	132.353
XM_759243.1	1329	1268.53	14979	858.329
XM_759244.1	672	401.346	48	8.69347
XM_759245.1	468	221.775	447	146.51
XM_759246.1	4446	3685.97	3574	70.4813
XM_759247.1	171	36.9457	29	57.0565
XM_759248.1	750	456.172	181	28.8418
XM_759249.1	3738	3096.02	546	12.8192
XM_759250.1	2778	2113.39	86	2.95795
XM_759251.1	1050	652.96	50	5.56615
XM_759252.1	693	336.022	548	118.545
XM_759253.1	594	309.7	650	152.561
XM_759254.1	474	227.526	2154	688.155
XM_759255.1	438	193.104	311	117.069
XM_759256.1	1377	1070.57	1867	126.765
XM_759257.1	1992	1979.73	4210.99	154.614
XM_759258.1	639	350.528	108.012	22.3987
XM_759259.1	2835	2610.46	1371	38.1762
XM_759260.1	489	242.151	929	278.869
XM_759261.1	1203	922.822	385	30.3259
XM_759262.1	1395	1337.74	5184	281.685
XM_759263.1	933	568.007	752	96.2356
XM_759264.1	210	48.7501	147	219.186
XM_759265.1	270	68.6015	172	182.249
XM_759266.1	1005	657.562	459	50.7396
XM_759267.1	432	187.412	402.827	156.241
XM_759268.1	1806	1601.18	2507.17	113.819
XM_759269.1	1167	836.557	2256	196.027
XM_759270.1	2417	1797.15	1880	76.0405
XM_759271.1	858	551.772	748	98.5403
XM_759272.1	657	339.56	434	92.9061
XM_759273.1	249	60.6341	193	231.373
XM_759274.1	2811	2888.08	5056	127.254
XM_759275.1	1098	908.943	638	51.0218
XM_759276.1	1044	877.883	660	54.6486
XM_759277.1	1317	987.678	1176	86.5493
XM_759278.1	3078	3210.33	3733	84.524
XM_759279.1	436	191.162	1451	551.743
XM_759280.1	363	126.431	311	178.804
XM_759281.1	1983	1742.77	4246	177.097
XM_759282.1	2856	2735.79	10787	286.608
XM_759283.1	3033	3236.84	7840	176.062
XM_759284.1	969	757.538	870	83.4808
XM_759285.1	1943	1600.26	1714	77.856
XM_759287.1	827	553.796	429	56.3092
XM_759288.1	2412	1980.68	3021	110.869
XM_759289.1	1200	862.699	543	45.7522
XM_759290.1	2007	1726.35	828	34.8636
XM_759291.1	861	775.068	4966	465.734
XM_759292.1	270	68.6015	612	648.469
XM_759293.1	678	496.402	1609	235.61
XM_759294.1	2193	1829.27	3188	126.681
XM_759295.1	489	242.151	2389	717.136
XM_759296.1	1221	885.687	653	53.5925
XM_759297.1	1071	629.114	468	54.074
XM_759298.1	687	469.511	1409	218.141
XM_759299.1	3921	3434.82	4107	86.9145
XM_759300.1	918	502.253	330	47.7598
XM_759301.1	1311	945.759	865	66.4825
XM_759302.1	1203	956.257	1433	108.929
XM_759303.1	1488	1161.84	1339	83.773
XM_759304.1	186	41.452	182	319.152
XM_759305.1	1905	1661.1	3125	136.75
XM_759306.1	405	162.574	419	187.342
XM_759307.1	937	625.389	1299	150.984
XM_759308.1	459	213.082	611	208.433
XM_759309.1	1956	2060.67	16235	572.685
XM_759310.1	1655	1453.03	1953	97.7008
XM_759311.1	240	57.5521	1640	2071.35
XM_759312.1	630	410.272	2237	396.338
XM_759313.1	882	660.106	410	45.1484
XM_759314.1	475	228.457	2519	801.484
XM_759315.1	933	709.005	2907	298.035
XM_759316.1	1721	1197.99	480	29.1245
XM_759317.1	1632	1276.51	1701	96.8619
XM_759318.1	2063	1894.19	1879	72.1066
XM_759319.1	921	579.136	691	86.73
XM_759320.1	1406	998.707	2205	160.488
XM_759321.1	1424	1311.87	2389	132.372
XM_759322.1	801	436.447	895	149.061
XM_759323.1	1326	884.725	423	34.7539
XM_759324.1	1014	756.18	348	33.4523
XM_759325.1	495	248.077	1	0.293011
XM_759326.1	894	639.597	1055	119.9
XM_759327.1	4638	4050.2	3084	55.3489
XM_759328.1	2889	2586.17	1801	50.6206
XM_759329.1	1146	899.566	463	37.4128
XM_759330.1	2289	2198.41	6255	206.819
XM_759331.1	1396	1125.22	913	58.9802
XM_759332.1	775	543.844	530	70.8391
XM_759333.1	1810	1584.01	14240	653.465
XM_759334.1	1569	1374.93	4279	226.221
XM_759335.1	534	286.416	389	98.7242
XM_759336.1	636	387.563	951	178.365
XM_759337.1	720	475.827	1100	168.041
XM_759338.1	1167	893.966	763	62.0405
XM_759339.1	882	679.802	2275	243.26
XM_759340.1	3213	2940.99	468	11.5671
XM_759341.1	708	350.071	626	129.984
XM_759342.1	837	573.001	487	61.7796
XM_759343.1	642	413.406	823	144.709
XM_759344.1	2703	2410.06	1539	46.4175
XM_759345.1	1053	701.07	934	96.8405
XM_759346.1	597	310.171	801	187.717
XM_759347.1	1451	1106.31	3232	212.358
XM_759348.1	10767	10034.8	19012	137.718
XM_759349.1	528	299.733	1185	287.379
XM_759350.1	978	722.663	1205	121.206
XM_759351.1	2142	1593.95	2500	114.008
XM_759352.1	1536	1110.52	1586	103.812
XM_759353.1	1569	1274.39	1535	87.5543
XM_759354.1	1068	700.466	1032	107.094
XM_759355.1	2988	2818.45	4498	116.006
XM_759356.1	603	349.317	635	132.137
XM_759357.1	4293	4086.53	3936	70.012
XM_759358.1	2541	2195.61	3054	101.108
XM_759359.1	405	162.574	234	104.625
XM_759360.1	743	471.862	526	81.0294
XM_759361.1	525	270.499	1012	271.949
XM_759362.1	1448	1350.06	1682	90.5617
XM_759363.1	1939	1838.47	4566	180.531
XM_759364.1	2379	2330.96	3434	107.087
XM_759365.1	1590	1554.36	1514	70.802
XM_759366.1	2229	2358.51	2994	92.2753
XM_759367.1	1262	1073.91	3533	239.138
XM_759368.1	966	687.917	1389	146.77
XM_759369.1	3177	3059.2	2163	51.3949
XM_759370.1	604	419.537	661	114.526
XM_759371.1	765	598.075	2567	311.991
XM_759372.1	929	788.088	1749	161.319
XM_759373.1	977	795.377	1675	153.078
XM_759374.1	543	295.3	295	72.6155
XM_759375.1	2826	2563.88	4589	130.105
XM_759376.1	540	363.124	1159	232.006
XM_759377.1	444	198.846	1026	375.061
XM_759378.1	1354	835.843	232	20.176
XM_759379.1	2187	2009.28	5532	200.13
XM_759380.1	471	224.685	830	268.519
XM_759381.1	1599	1238.38	4635	272.062
XM_759382.1	1032	707.894	438	44.9756
XM_759383.1	477	230.457	1	0.315414
XM_759384.1	348	114.649	2	1.26804
XM_759385.1	243	58.5491	1	1.24151
XM_759386.1	483	236.271	6	1.84592
XM_759387.1	1803	1360.87	714	38.1377
XM_759388.1	609	366.619	3583	710.401
XM_759389.1	1755	1259.94	3569	205.906
XM_759390.1	873	642.135	495	56.0338
XM_759391.1	1445	1116.64	1211	78.8317
XM_759392.1	1448	1047.32	901	62.5342
XM_759393.1	831	609.632	946	112.796
XM_759394.1	957	678.264	1467	157.218
XM_759395.1	888	529.746	821	112.654
XM_759396.1	1248	930.166	1139	89.0092
XM_759397.1	603	328.534	451	99.7857
XM_759398.1	1290	1071.92	837	56.7589
XM_759399.1	1911	1662.7	2100	91.8074
XM_759400.1	753	411.054	664	117.42
XM_759401.1	324	97.6031	221	164.589
XM_759402.1	783	462.601	606	95.2221
XM_759403.1	594	346.02	152	31.9311
XM_759404.1	1119	816.896	1297	115.41
XM_759405.1	636	422.363	675	116.169
XM_759406.1	674	461.651	3942	620.69
XM_759407.1	714	375.018	811	157.196
XM_759408.1	522	252.03	705	203.333
XM_759409.1	888	695.65	1168	122.046
XM_759410.1	3408	3029.36	4999	119.951
XM_759411.1	519	280.46	534	138.402
XM_759412.1	4407	4186.74	6049	105.022
XM_759413.1	1052	687.895	641	67.7341
XM_759414.1	1911	1461.58	2124	105.634
XM_759415.1	1885	1672.92	3441	149.514
XM_759416.1	1746	1584.35	387	17.7554
XM_759417.1	1338	922.37	1292	101.819
XM_759418.1	375	136.202	824	439.761
XM_759419.1	4878	4506.45	7340	118.395
XM_759420.1	468	221.775	531	174.042
XM_759421.1	783	529.228	1521	208.909
XM_759422.1	1701	1318.88	3353	184.799
XM_759423.1	1365	1146.17	690	43.7594
XM_759424.1	2175	1890.2	3927	151.016
XM_759425.1	1872	1488.09	1134	55.393
XM_759426.1	888	593.82	751	91.9299
XM_759427.1	3862	3573.02	14074	286.321
XM_759428.1	3987	3247.12	3084	69.038
XM_759429.1	1176	958.355	1676	127.122
XM_759430.1	2826	2486.74	1397	40.8355
XM_759431.1	651	322.069	7	1.57987
XM_759432.1	1068	716.393	990	100.451
XM_759433.1	1128	817.627	1460	129.798
XM_759434.1	840	584.034	686	85.3803
XM_759435.1	600	351.82	646	133.47
XM_759436.1	649	357.244	1016	206.728
XM_759437.1	1477	1230.49	3403	201.028
XM_759438.1	1413	1188.08	2514	153.812
XM_759439.1	1063	808.065	2388	214.812
XM_759440.1	1470	1107.67	78	5.11866
XM_759441.1	2334	1878.43	1486	57.5038
XM_759442.1	2376	1840.58	688	27.171
XM_759443.1	1191	876.663	628	52.0713
XM_759444.1	810	528.592	62	8.52595
XM_759445.1	4215	3200.94	2817	63.9707
XM_759446.1	2274	1819.06	116	4.63534
XM_759447.1	513	265.718	481	131.582
XM_759448.1	453	207.336	834	292.391
XM_759449.1	2031	1505.73	545	26.31
XM_759450.1	3414	3337.26	1848	40.2516
XM_759451.1	4767	3531.78	4168	85.7839
XM_759452.1	1738	1554.54	3849	179.977
XM_759453.1	608	329.415	6375	1406.72
XM_759454.1	831	455.769	256	40.8288
XM_759455.1	618	338.715	752	161.382
XM_759456.1	1258	834.47	385	33.5368
XM_759457.1	1489	1228.42	5884	348.174
XM_759458.1	5151	4244.47	729	12.4846
XM_759459.1	1370	888.136	177	14.4866
XM_759460.1	1725	1455.62	1106	55.2304
XM_759461.1	1587	1185.09	908	55.6937
XM_759462.1	1299	977.336	855.806	63.6507
XM_759463.1	1614	1192.19	1256	76.5799
XM_759464.1	1452	1201.89	671	40.5816
XM_759465.1	1644	1315.11	277.194	15.3213
XM_759466.1	864	522.315	136	18.9268
XM_759467.1	873	506.577	312	44.7693
XM_759468.1	165	35.7668	66	134.133
XM_759469.1	9903	9727.12	680.789	5.08745
XM_759470.1	1590	1319.76	99.9995	5.50774
XM_759471.1	1419	1149.67	1363.93	86.2358
XM_759472.1	1686	1273.42	625.982	35.7324
XM_759473.1	1347	898.432	257.116	20.8025
XM_759474.1	1536	1092.64	447.926	29.7989
XM_759475.1	1569	1111.56	839.515	54.8992
XM_759476.1	1410	975.409	102.819	7.66225
XM_759477.1	1497	1157.04	103	6.47083
XM_759478.1	2124	1725.08	81	3.41308
XM_759479.1	765	409.358	452.162	80.2901
XM_759480.1	1740	1438.36	81.449	4.11613
XM_759481.1	1713	1388.38	130.888	6.85276
XM_759482.1	1788	1468.88	255.551	12.6463
XM_759483.1	1548	1240.63	410.723	24.0646
XM_759484.1	522	274.501	52	13.7699
XM_759485.1	1011	722.635	105	10.5619
XM_759486.1	1353	1007.11	847	61.1335
XM_759487.1	1473	1044	205	14.2734
XM_759488.1	2376	1584.61	107	4.90831
XM_759489.1	1338	837.425	148	12.8466
XM_759490.1	1494	928.912	367	28.7186
XM_759491.1	1326	869.503	672.639	56.2319
XM_759492.1	4596	4017.14	1236.31	22.3709
XM_759493.1	4599	3732.96	336.936	6.56093
XM_759494.1	1659	1324.72	368	20.1927
XM_759495.1	5373	4555.73	500	7.97782
XM_759496.1	2304	1734.47	2346	98.318
XM_759497.1	831	600.916	1052	127.255
XM_759498.1	1050	792.262	3396	311.581
XM_759499.1	1965	1457.82	1364	68.0115
XM_759500.1	1713	1423.44	1357	69.2965
XM_759501.1	3372	3115.47	3012	70.2754
XM_759502.1	501	253.901	355	101.633
XM_759503.1	654	383.023	485	92.0425
XM_759504.1	876	550.322	699	92.3277
XM_759505.1	3945	3381.71	2419	51.9961
XM_759506.1	1098	635.003	15	1.71707
XM_759507.1	864	430.859	8	1.34967
XM_759508.1	1938	1359.7	24	1.28304
XM_759509.1	2328	2045.42	1798	63.8967
XM_759510.1	1170	920.463	2254	178
XM_759511.1	687	368.114	279	55.0927
XM_759512.1	650	350.994	1696	351.235
XM_759513.1	1737	1217.13	306.201	18.2869
XM_759514.1	2053	1536.13	6072	287.326
XM_759515.1	1948	1929.78	5409	203.742
XM_759516.1	1386	1068.89	779	52.9754
XM_759517.1	1053	784.601	2566	237.727
XM_759518.1	1041	898.809	904	73.1093
XM_759519.1	1752	1224.39	591.799	35.1339
XM_759520.1	1089	927.263	565	44.2912
XM_759521.1	1072	808.169	2113	190.051
XM_759522.1	1239	1206.69	657	39.5769
XM_759523.1	831	511.967	433	61.4777
XM_759524.1	673	395.112	1695	311.832
XM_759525.1	1791	1400.14	2377	123.404
XM_759526.1	420	176.316	547	225.511
XM_759527.1	2874	2651.77	713	19.5445
XM_759528.1	1755	1492.15	600	29.2287
XM_759529.1	1845	1275.73	70	3.98852
XM_759530.1	1458	1099.49	532	35.1717
XM_759531.1	2751	2002.63	1381	50.1261
XM_759532.1	1143	1096.07	977	64.7932
XM_759533.1	1529	1213.24	2117	126.837
XM_759534.1	1113	1070.13	760	51.6236
XM_759535.1	2634	2194.46	2995	99.2067
XM_759536.1	1869	1754.13	587	24.3247
XM_759537.1	1042	888.169	3276	268.114
XM_759538.1	2580	2517.39	2912	84.0838
XM_759539.1	1539	1186.42	1700	104.155
XM_759540.1	672	412.911	2680	471.791
XM_759541.1	819	580.434	72	9.01677
XM_759542.1	786	550.672	2021	266.775
XM_759543.1	747	519.947	2240	313.156
XM_759544.1	1035	801.706	763	69.1801
XM_759545.1	285	75.5406	429	412.809
XM_759546.1	3270	3040.92	5080	121.431
XM_759547.1	882	513.951	374	52.8959
XM_759548.1	1950	1425.56	2100	107.079
XM_759549.1	1206	960.214	924	69.948
XM_759550.1	1453	1057.85	1035	71.1195
XM_759551.1	3042	2661.61	2877	78.5718
XM_759552.1	1042	719.338	448	45.2706
XM_759553.1	1446	1199.7	808	48.9564
XM_759554.1	628	320.383	2516	570.837
XM_759555.1	1016	707.006	691	71.0438
XM_759556.1	328	100.471	621	449.284
XM_759557.1	792	537.003	927	125.48
XM_759558.1	1145	986.527	11827	871.44
XM_759559.1	915	669.447	9823	1066.6
XM_759560.1	843	564.678	372	47.8865
XM_759561.1	264	66.3333	185	202.727
XM_759562.1	1500	1109.33	610	39.9707
XM_759563.1	2133	1905.34	9342	356.4
XM_759564.1	1428	1049.78	1125	77.8975
XM_759565.1	708	483.85	3294	494.863
XM_759566.1	794	494.516	3717	546.366
XM_759567.1	438	193.104	754	283.826
XM_759568.1	309	88.2177	467	384.798
XM_759569.1	816	561.561	3954	511.813
XM_759570.1	465	218.886	358	118.888
XM_759571.1	1377	1191.35	2292	139.845
XM_759572.1	1377	1084.61	1692	113.396
XM_759573.1	1839	1350.05	112	6.03031
XM_759574.1	1716	1341.01	73.7289	3.99648
XM_759575.1	1353	999.179	259.271	18.8618
XM_759576.1	362	125.512	71	41.1191
XM_759577.1	1196	780.036	1058	98.5922
XM_759578.1	249	60.6341	232	278.127
XM_759579.1	345	112.474	215	138.95
XM_759580.1	780	423.831	575	98.6159
XM_759581.1	675	322.474	623	140.431
[truncated: 2,062 more rows]

## Sheet: Schizont 2_abundance.tsv
target_id	length	eff_length	est_counts	tpm
XM_757577.1	618	431.589	9	7.71461
XM_757578.1	534	347.888	16	17.0146
XM_757579.1	741	314.747	586	688.777
XM_757580.1	237	73.5742	2	10.0565
XM_757581.1	699	201.46	114	209.343
XM_757582.1	426	241.769	286	437.63
XM_757583.1	204	51.2222	2	14.4449
XM_757584.1	363	181.834	251	510.671
XM_757585.1	624	192.05	2	3.85263
XM_757586.1	465	279.738	3	3.96746
XM_757587.1	336	156.553	8	18.9047
XM_757588.1	579	187.996	7	13.775
XM_757589.1	624	226.275	427	698.124
XM_757590.1	306	129.877	0	0
XM_757591.1	117	12.8872	5	143.533
XM_757592.1	423	238.914	4	6.19384
XM_757593.1	375	193.031	661	1266.83
XM_757594.1	672	485.546	5	3.80962
XM_757595.1	1236	690.94	3338	1787.26
XM_757596.1	402	218.782	607	1026.41
XM_757597.1	642	455.546	10	8.12101
XM_757598.1	585	189.659	296	577.377
XM_757599.1	1509	669.937	520	287.152
XM_757600.1	1590	735.294	825	415.083
XM_757601.1	225	65.0444	5	28.4382
XM_757602.1	294	119.444	2	6.19454
XM_757603.1	183	38.4508	0	0
XM_757604.1	3018	1493.47	1530	378.998
XM_757605.1	1605	799.605	1032	477.47
XM_757606.1	492	306.179	4	4.8331
XM_757607.1	231	69.2084	7	37.418
XM_757608.1	525	338.922	369.147	402.941
XM_757609.1	162	27.7244	0	0
XM_757610.1	237	73.5742	132.062	664.042
XM_757611.1	525	338.922	511.31	558.12
XM_757612.1	162	27.7244	6	80.0629
XM_757613.1	237	73.5742	287.991	1448.09
XM_757614.1	492	306.179	16	19.3324
XM_757615.1	381	198.833	671	1248.47
XM_757616.1	237	73.5742	144.946	728.826
XM_757617.1	525	338.922	87.5426	95.5569
XM_757618.1	1092	458.717	560	451.633
XM_757619.1	948	371.23	63	62.7826
XM_757620.1	693	253.585	80	116.71
XM_757621.1	1407	1301.66	14.8597	4.22335
XM_757622.1	2025	2036.12	6.19751	1.12604
XM_757623.1	2019	2007.98	36.2195	6.67305
XM_757624.1	2214	2284.82	0.00937758	0.00151838
XM_757625.1	2049	2071.71	2.07898	0.371248
XM_757626.1	1440	1419.93	4.71826	1.2293
XM_757627.1	580	393.67	0	0
XM_757628.1	1467	1427.75	3.60146	0.933185
XM_757629.1	2010	1991.53	8.05321	1.49598
XM_757630.1	1476	1455.52	10.6152	2.69806
XM_757631.1	1407	1301.66	14.8597	4.22335
XM_757632.1	1476	1458.78	7.25386	1.83959
XM_757633.1	1647	1460.5	0	0
XM_757634.1	2007	2028.29	6.08665	1.11017
XM_757635.1	1638	1583.56	5.70986	1.33393
XM_757636.1	1440	1419.93	4.71826	1.2293
XM_757637.1	2049	2071.71	2.07898	0.371248
XM_757638.1	2214	2285.14	198.651	32.1602
XM_757639.1	1473	1456.23	118	29.9774
XM_757640.1	1818	1824.87	32.0851	6.50451
XM_757641.1	2010	2037.3	1.74616	0.317082
XM_757642.1	2001	2011.7	7.86236	1.44588
XM_757643.1	1470	1400.15	3.18605	0.84182
XM_757644.1	1218	1126.23	1.21813	0.400137
XM_757645.1	1249	1208.56	7.18732	2.2001
XM_757646.1	1452	1450.2	0	0
XM_757647.1	1452	1417.5	3.2275	0.842337
XM_757648.1	2388	2430.21	87.7761	13.3621
XM_757649.1	237	73.5742	43	216.215
XM_757650.1	833	567.461	198	129.084
XM_757651.1	1359	1081.42	521	178.232
XM_757652.1	1807	1036.51	536	191.308
XM_757653.1	222	63.0822	68	398.79
XM_757654.1	1405	1034.75	82	29.3172
XM_757655.1	984	798.939	380	175.959
XM_757656.1	447	206.568	49	87.7556
XM_757657.1	1944	1650.53	348	78.0008
XM_757658.1	1122	812.16	672	306.104
XM_757659.1	1092	861.154	515	221.243
XM_757660.1	2415	1918.85	980	188.941
XM_757661.1	405	221.559	263	439.145
XM_757662.1	999	579.477	414	264.305
XM_757663.1	417	186.168	10	19.8717
XM_757664.1	951	571.579	16	10.3558
XM_757665.1	684	387.251	18	17.1958
XM_757666.1	867	504.523	1	0.733265
XM_757667.1	816	482.146	88	67.5221
XM_757668.1	399	215.891	2	3.42718
XM_757669.1	729	427.405	51	44.1441
XM_757670.1	1192	901.276	1258	516.375
XM_757671.1	1544	1266.62	557	162.687
XM_757672.1	900	566.57	63	41.1366
XM_757673.1	747	503.824	351	257.733
XM_757674.1	447	250.723	186	274.449
XM_757675.1	2223	2022.79	1650	301.77
XM_757676.1	1032	923.178	660	264.485
XM_757677.1	1404	1089.27	922	313.14
XM_757678.1	2013	1424.8	153	39.7265
XM_757679.1	297	121.968	129	391.28
XM_757680.1	3687	3329.85	414	45.9958
XM_757681.1	231	69.2084	152	812.506
XM_757682.1	6162	5904.34	4626	289.852
XM_757683.1	1227	872.663	178	75.4598
XM_757684.1	490	318.105	310	360.524
XM_757685.1	3477	3482.77	2521	267.787
XM_757686.1	805	699.949	2573	1359.93
XM_757687.1	984	935.098	298	117.897
XM_757688.1	3246	3332.72	1563	173.501
XM_757689.1	498	353.697	374	391.185
XM_757690.1	1551	1564.61	265	62.6588
XM_757691.1	2154	1816.32	2	0.407361
XM_757692.1	411	190.36	155	301.23
XM_757693.1	1470	1231.27	699	210.023
XM_757694.1	4716	4976.86	1076	79.9832
XM_757695.1	1173	928.985	10	3.9823
XM_757696.1	582	405.881	284	258.858
XM_757697.1	579	408.427	228	206.52
XM_757698.1	7080	7075.27	2286	119.53
XM_757699.1	5664	5066.35	2373	173.278
XM_757700.1	5766	5456.36	1948	132.077
XM_757701.1	198	47.1786	40	313.659
XM_757702.1	339	159.374	10	23.2126
XM_757703.1	1829	1642.49	901	202.939
XM_757704.1	747	398.319	256	237.766
XM_757705.1	1116	908.52	72	29.3184
XM_757706.1	3898	3458.05	829	88.688
XM_757707.1	1338	1014.41	1	0.364693
XM_757708.1	1800	1670.23	705	156.155
XM_757709.1	633	451.056	53	43.4698
XM_757710.1	624	482.741	318	243.7
XM_757711.1	546	336.096	14	15.4102
XM_757712.1	1122	790.71	65	30.4115
XM_757713.1	1569	1108.93	307	102.418
XM_757714.1	679	411.292	649	583.763
XM_757715.1	408	212.786	57	99.1003
XM_757716.1	294	119.444	57	176.544
XM_757717.1	222	63.0822	67	392.926
XM_757718.1	846	482.558	148	113.463
XM_757719.1	1434	962.695	243	93.3813
XM_757720.1	927	748.986	72	35.5632
XM_757721.1	1223	782.623	387	182.937
XM_757722.1	2254	1908.39	2522	488.899
XM_757723.1	1596	1439.28	361	92.7907
XM_757724.1	1972	1692.04	600	131.185
XM_757725.1	937	720.553	264	135.544
XM_757726.1	384	202.616	77	140.591
XM_757727.1	5172	4045.95	880	80.4644
XM_757728.1	1009	774.539	1663	794.312
XM_757729.1	1458	1231.86	521	156.466
XM_757730.1	240	75.8143	13	63.4358
XM_757731.1	853	517.49	108	77.2083
XM_757732.1	1779	1193.17	1	0.310055
XM_757733.1	1984	1454.48	186	47.3093
XM_757734.1	1644	1447.88	425	108.592
XM_757735.1	699	452.145	145	118.64
XM_757736.1	1659	1320.46	361	101.14
XM_757737.1	240	75.8143	30	146.39
XM_757738.1	177	35.2701	25	262.226
XM_757739.1	219	60.9636	25	151.709
XM_757740.1	1413	1033.76	116	41.5127
XM_757741.1	556	357.645	458	473.757
XM_757742.1	1611	1321.5	997	279.106
XM_757743.1	273	101.798	105	381.587
XM_757744.1	830	595.006	203	126.217
XM_757745.1	1791	1565.22	493	116.523
XM_757746.1	1359	1235.78	593	177.524
XM_757747.1	589	427.811	780	674.504
XM_757748.1	744	544.829	1133	769.329
XM_757749.1	1234	1022.67	649	234.775
XM_757750.1	1182	782.235	88	41.6186
XM_757751.1	1728	1302.96	75.7708	21.5136
XM_757752.1	3546	2840.96	74	9.63626
XM_757753.1	1608	1124.17	131	43.1105
XM_757754.1	1995	1874.36	1236	243.954
XM_757755.1	276	104.312	26	92.2106
XM_757756.1	919	780.291	82	38.8776
XM_757757.1	399	210.51	74	130.047
XM_757758.1	420	303.651	20	24.3667
XM_757759.1	1761	1362.5	590	160.198
XM_757760.1	1140	871.661	362	153.64
XM_757761.1	1848	1721.45	1709	367.273
XM_757762.1	801	746.259	196	97.1647
XM_757763.1	315	137.684	129	346.615
XM_757764.1	390	207.297	57	101.724
XM_757765.1	999	715.012	162	83.8192
XM_757766.1	417	211.478	138	241.411
XM_757767.1	374	192.09	80	154.074
XM_757768.1	2907	2236	524	86.6966
XM_757769.1	2001	1580.82	48	11.2331
XM_757770.1	249	82.6109	10	44.7821
XM_757771.1	2131	1502.34	837	206.11
XM_757772.1	1734	1248.69	194	57.4765
XM_757773.1	822	574.99	64	41.1777
XM_757774.1	1054	655.209	365	206.089
XM_757775.1	878	647.726	1331	760.202
XM_757776.1	563	378.314	836	817.516
XM_757777.1	3735	3465.29	729	77.827
XM_757778.1	6929	6130.82	2517	151.882
XM_757779.1	2181	1594.56	64.8794	15.0525
XM_757780.1	3075	2523.67	107.183	15.7122
XM_757781.1	975	783.871	347	163.767
XM_757782.1	5022	4362.78	1953	165.608
XM_757783.1	162	27.7244	66	880.692
XM_757784.1	1544	1227.57	376	113.314
XM_757785.1	2460	1885.45	2373	465.613
XM_757786.1	715	551.342	1673	1122.58
XM_757787.1	573	300.105	232	285.994
XM_757788.1	609	358.168	53	54.7433
XM_757789.1	1359	1149.63	371	119.388
XM_757790.1	588	316.033	59	69.0656
XM_757791.1	1629	1120.07	186	61.4339
XM_757792.1	558	409.274	220	198.861
XM_757793.1	1335	1146.93	669	215.789
XM_757794.1	7470	6409.37	3803	219.509
XM_757795.1	666	413.518	209	186.979
XM_757796.1	1136	883.838	420	175.8
XM_757797.1	588	404.105	216	197.743
XM_757798.1	585	292.132	6	7.59826
XM_757799.1	1064	626.26	183	108.103
XM_757800.1	324	145.754	121	307.119
XM_757801.1	1374	978.825	190	71.8109
XM_757802.1	1257	817.905	215	97.2474
XM_757803.1	471	204.211	122	221.016
XM_757804.1	1410	1047.64	250	88.2815
XM_757805.1	451	242.707	105	160.048
XM_757806.1	684	464.686	531	422.744
XM_757807.1	1093	771.067	236	113.23
XM_757808.1	504	242.404	12	18.314
XM_757809.1	654	454.439	53	43.1462
XM_757810.1	903	547.051	13	8.7914
XM_757811.1	585	340.771	214	232.324
XM_757812.1	699	503.678	151	110.909
XM_757813.1	1476	1104.09	321	107.558
XM_757814.1	357	176.07	139	292.059
XM_757815.1	843	554.88	147	98.0077
XM_757816.1	5391	4341.42	74.1667	6.32004
XM_757817.1	3468	3054.24	655	79.3379
XM_757818.1	1859	1627.87	1517	344.753
XM_757819.1	2703	2313.65	394	63.0001
XM_757820.1	1800	1456.46	360	91.4423
XM_757821.1	5280	4126.51	620	55.5841
XM_757822.1	696	402.496	297	272.984
XM_757823.1	580	314.513	237	278.774
XM_757824.1	462	273.624	27	36.5049
XM_757825.1	2409	1984.22	295	55.0016
XM_757826.1	525	341.866	59	63.8467
XM_757827.1	963	840.969	280	123.174
XM_757828.1	1590	1341.07	497	137.103
XM_757829.1	1086	691.356	397	212.437
XM_757830.1	1071	716.324	78	40.2835
XM_757831.1	201	49.1778	23	173.022
XM_757832.1	1062	650.746	3	1.7055
XM_757833.1	1182	913.867	167	67.6045
XM_757834.1	948	819.527	86	38.8219
XM_757835.1	594	410.059	135	121.795
XM_757836.1	945	692.465	45	24.0412
XM_757837.1	231	69.2084	5	26.7272
XM_757838.1	267	96.9818	76	289.912
XM_757839.1	1390	1072.96	275	94.8178
XM_757840.1	723	543.175	321	218.629
XM_757841.1	1047	818.176	26	11.7562
XM_757842.1	2016	1443.65	421	107.885
XM_757843.1	195	45.2793	115	939.594
XM_757844.1	1008	640.425	88	50.8343
XM_757845.1	306	129.877	20	56.9692
XM_757846.1	450	235.38	46	72.2986
XM_757847.1	2418	2309.56	419	67.1162
XM_757848.1	1459	1300.21	1025	291.643
XM_757849.1	448	209.149	238	420.982
XM_757850.1	339	194.861	378	717.642
XM_757851.1	768	552.831	698	467.095
XM_757852.1	780	681.262	439	238.393
XM_757853.1	2241	2098.61	276	48.6541
XM_757854.1	1697	1283.74	520	149.854
XM_757855.1	1371	1175.8	655	206.086
XM_757856.1	1341	1221.86	437	132.313
XM_757857.1	2492	2284.46	476	77.0844
XM_757858.1	2658	2522.04	408	59.8481
XM_757859.1	3036	3341.92	1283	142.028
XM_757860.1	1269	1146.65	18	5.80741
XM_757861.1	2262	2416.35	2020	309.267
XM_757862.1	673	401.484	188	173.234
XM_757863.1	522	404.93	232	211.958
XM_757864.1	426	208.416	49	86.9775
XM_757865.1	2721	2565.39	945	136.276
XM_757866.1	1053	857.597	7	3.01965
XM_757867.1	770	667.163	415	230.122
XM_757868.1	234	71.4159	112	580.184
XM_757869.1	2724	2366.73	126	19.6953
XM_757870.1	783	560.412	50	33.0069
XM_757871.1	1722	1461.45	438	110.875
XM_757872.1	1391	1086.19	313	106.606
XM_757873.1	1254	1123.18	442	145.585
XM_757874.1	357	176.07	92	193.305
XM_757875.1	270	99.3186	236	879.071
XM_757876.1	1389	1127.41	900	295.328
XM_757877.1	1251	1105.52	163	54.5459
XM_757878.1	1731	1573.16	246	57.8501
XM_757879.1	1068	790.201	175	81.9299
XM_757880.1	1771	1389.74	1145	304.799
XM_757881.1	1194	834.186	47	20.8438
XM_757882.1	660	297.259	102	126.943
XM_757883.1	1431	1311.74	1222	344.641
XM_757884.1	737	431.778	237	203.063
XM_757885.1	582	391.44	180	170.118
XM_757886.1	633	327.022	151	170.821
XM_757887.1	1584	1045.17	4	1.41585
XM_757888.1	1062	764.546	223	107.906
XM_757889.1	640	437.645	262	221.473
XM_757890.1	840	586.362	249	157.1
XM_757891.1	576	311.386	12	14.2569
XM_757892.1	866	636.498	1309	760.825
XM_757893.1	4359	3809.1	2239	217.457
XM_757894.1	4341	3684.42	353	35.4444
XM_757895.1	5895	4735.35	130	10.1563
XM_757896.1	4128	3571.8	176.36	18.2665
XM_757897.1	2343	1624.24	29	6.60527
XM_757898.1	1209	710.512	103	53.63
XM_757899.1	1560	1112.39	242	80.482
XM_757900.1	1564	1223.46	305	92.2256
XM_757901.1	1173	841.779	5	2.19743
XM_757902.1	1692	1377.25	145.043	38.9608
XM_757903.1	1989	1583.07	50.3359	11.7631
XM_757904.1	1296	910.886	65.4784	26.5935
XM_757905.1	1533	1141.25	28.3948	9.20453
XM_757906.1	1920	1510.49	57.5	14.0829
XM_757907.1	1530	1192.3	88.7848	27.5483
XM_757908.1	447	193.871	11	20.9904
XM_757909.1	1026	726.868	39	19.8496
XM_757910.1	1530	1139.61	29.6052	9.61063
XM_757911.1	1920	1510.49	57.5	14.0829
XM_757912.1	1830	1404.81	465.215	122.512
XM_757913.1	1707	1276.66	312	90.4107
XM_757914.1	1824	1381.13	185	49.5542
XM_757915.1	1614	1153.74	25	8.01634
XM_757916.1	1989	1583.07	50.3359	11.7631
XM_757917.1	1446	1002.84	116.522	42.9848
XM_757918.1	1395	989.886	384	143.512
XM_757919.1	1398	1014.76	316	115.203
XM_757920.1	1095	816.816	258	116.852
XM_757921.1	1275	888.085	123	51.2381
XM_757922.1	1344	1040.65	72	25.5959
XM_757923.1	462	276.765	58	77.5279
XM_757924.1	1854	1428.2	81	20.9815
XM_757925.1	1305	1142.96	71.8051	23.2417
XM_757926.1	1590	1312.32	53.5848	15.1058
XM_757927.1	1476	1173.37	484.385	152.721
XM_757928.1	1476	1175.79	375	117.989
XM_757929.1	1098	678.527	122	66.5174
XM_757930.1	1707	1231.2	90.283	27.1281
XM_757931.1	1503	1111.46	173	57.583
XM_757932.1	552	224.518	15	24.7162
XM_757933.1	4590	3657.41	221.674	22.4225
XM_757934.1	2736	2326.7	49	7.79109
XM_757935.1	711	484.948	108	82.3892
XM_757936.1	852	475.814	392	304.783
XM_757937.1	1679	1578.41	573	134.3
XM_757938.1	429	196.039	71	133.985
XM_757939.1	2222	1840.46	1227	246.638
XM_757940.1	1104	985.903	620	232.648
XM_757941.1	1353	1199.01	275	84.85
XM_757942.1	177	35.2701	51	534.94
XM_757943.1	1065	883.009	417	174.708
XM_757944.1	297	121.968	154	467.109
XM_757945.1	1287	1059.54	326	113.827
XM_757946.1	1068	820.58	273	123.079
XM_757947.1	2184	1930.91	2	0.383187
XM_757948.1	1440	1262.6	7	2.05105
XM_757949.1	1215	1122.4	359	118.329
XM_757950.1	270	99.3186	52	193.694
XM_757951.1	869	679.506	363	197.631
XM_757952.1	765	662.808	34	18.9773
XM_757953.1	402	218.222	227	384.83
XM_757954.1	1635	1483.6	599	149.366
XM_757955.1	612	382.731	217	209.753
XM_757956.1	1227	1113.7	186	61.7855
XM_757957.1	774	652.109	29	16.452
XM_757958.1	998	759.114	127	61.8926
XM_757959.1	1524	1169.68	365.756	115.683
XM_757960.1	606	402.958	163	149.648
XM_757961.1	564	418.197	180	159.233
XM_757962.1	867	742.838	211	105.082
XM_757963.1	432	232.535	432	687.287
XM_757964.1	1131	998.418	870	322.366
XM_757965.1	606	380.149	47	45.7389
XM_757966.1	1314	1301.81	1	0.284181
XM_757967.1	1323	1167.25	1052	333.421
XM_757968.1	363	181.834	114	231.938
XM_757969.1	273	101.798	73	265.294
XM_757970.1	390	222.033	351	584.832
XM_757971.1	1434	1512.31	451	110.326
XM_757972.1	951	810.431	669	305.388
XM_757973.1	1581	1391.3	963	256.063
XM_757974.1	5043	5098.32	1768	128.291
XM_757975.1	1336	1073.61	382	131.632
XM_757976.1	480	281.277	459	603.699
XM_757977.1	555	385.093	215	206.545
XM_757978.1	649	404.269	1228	1123.75
XM_757979.1	540	280.656	111	146.316
XM_757980.1	1506	1020.69	212	76.8397
XM_757981.1	1796	1455.56	692	175.881
XM_757982.1	1542	1219.89	30	9.0979
XM_757983.1	1257	990.318	9	3.3621
XM_757984.1	660	470.936	452	355.074
XM_757985.1	3745	3569.07	5628	583.366
XM_757986.1	414	195.05	18	34.1404
XM_757987.1	1806	1488.12	314	78.0609
XM_757988.1	888	582.491	212	134.644
XM_757989.1	1422	1262.42	119.191	34.9286
XM_757990.1	1428	1234.2	1155.81	346.451
XM_757991.1	2011	1638.19	398	89.8797
XM_757992.1	2010	1382.3	461	123.379
XM_757993.1	321	143.055	603	1559.4
XM_757994.1	234	71.4159	104	538.742
XM_757995.1	627	497.651	237	176.184
XM_757996.1	849	701.582	50	26.3653
XM_757997.1	1600	1370.25	302	81.5361
XM_757998.1	774	637.834	260	150.802
XM_757999.1	432	246.237	2	3.00483
XM_758000.1	783	581.65	143	90.9529
XM_758001.1	510	281.407	154	202.455
XM_758002.1	525	266.222	128	177.872
XM_758003.1	1590	1293.04	500	143.054
XM_758004.1	1866	1609.07	332	76.3317
XM_758005.1	2121	1494.92	26	6.43425
XM_758006.1	696	417.921	2	1.77043
XM_758007.1	734	481.618	360	276.53
XM_758008.1	2604	2110.14	492	86.2575
XM_758009.1	804	524.624	132	93.0824
XM_758010.1	2604	2474.2	483	72.2196
XM_758011.1	885	701.148	204	107.637
XM_758012.1	1932	1334.44	75	20.7924
XM_758013.1	837	554.158	508	339.135
XM_758014.1	695	445.154	297	246.824
XM_758015.1	984	894.806	678	280.313
XM_758016.1	951	774.241	107	51.1269
XM_758017.1	1974	1707.54	1013	219.473
XM_758018.1	2568	2784.08	747	99.2617
XM_758019.1	531	363.297	332	338.079
XM_758020.1	690	513.365	179	128.994
XM_758021.1	432	317.687	91	105.97
XM_758022.1	1377	1345.31	417	114.672
XM_758023.1	477	319.7	42	48.6013
XM_758024.1	708	482.561	6	4.59983
XM_758025.1	668	574.942	380	244.513
XM_758026.1	687	575.432	293	188.372
XM_758027.1	2970	3017.25	613	75.1608
XM_758028.1	594	407.63	0	0
XM_758029.1	735	589.611	2	1.25489
XM_758030.1	810	602.79	305	187.187
XM_758031.1	699	603.858	241	147.647
XM_758032.1	2742	2562.6	1569	226.508
XM_758033.1	2007	2173.13	994	169.216
XM_758034.1	3157	3243.55	1407	160.478
XM_758035.1	1704	1881.56	763	150.02
XM_758036.1	1998	1912.1	480	92.8696
XM_758037.1	1683	1382.81	419	112.097
XM_758038.1	567	405.924	27	24.6071
XM_758039.1	5091	5049.33	133.568	9.78611
XM_758040.1	165	29.1622	94	1192.48
XM_758041.1	135	17.4459	91	1929.71
XM_758042.1	438	220.459	140	234.932
XM_758043.1	2076	1625.81	150	34.1321
XM_758044.1	597	316.024	146	170.913
XM_758045.1	2303	1653.91	518	115.867
XM_758046.1	643	307.441	291	350.166
XM_758047.1	2244	1469.42	144	36.2542
XM_758048.1	1446	1062.6	245	85.2979
XM_758049.1	3093	2859.7	1091	141.139
XM_758050.1	1021	692.645	735	392.571
XM_758051.1	1002	695.44	192	102.137
XM_758052.1	525	305.313	12	14.5405
XM_758053.1	2997	2365.69	708	110.718
XM_758054.1	939	699.879	539	284.91
XM_758055.1	363	181.834	60	122.073
XM_758056.1	1233	870.601	175	74.3637
XM_758057.1	339	159.374	89	206.592
XM_758059.1	576	352.327	16	16.8003
XM_758060.1	573	294.694	5	6.27683
XM_758061.1	927	788.036	181	84.9717
XM_758062.1	2076	1899.09	980	190.907
XM_758063.1	1056	815.36	164	74.4109
XM_758064.1	390	228.109	80	129.745
XM_758065.1	1947	1689.5	208	45.5456
XM_758066.1	786	530.02	37	25.8257
XM_758067.1	1153	856.547	534	230.639
XM_758068.1	2184	1619.72	312	71.2616
XM_758069.1	5301	4699.37	1000	78.7231
XM_758070.1	525	280.108	252	332.826
XM_758071.1	2820	2510.76	538	79.2718
XM_758072.1	1494	1398.71	2135	564.694
XM_758073.1	4302	3848.8	3442	330.847
XM_758074.1	1824	1485.14	69	17.1879
XM_758075.1	387	224.342	44	72.5578
XM_758076.1	447	289.939	68	86.7649
XM_758077.1	411	272.389	1621.03	2201.63
XM_758078.1	2339	2284.48	1440	233.194
XM_758079.1	483	285.873	67	86.7049
XM_758080.1	675	448.521	270	222.701
XM_758081.1	552	311.496	126	149.645
XM_758082.1	937	729.122	158	80.1676
XM_758083.1	1506	1142.63	161	52.1271
XM_758084.1	1296	1041.23	338	120.092
XM_758085.1	1470	1387.09	137	36.5392
XM_758086.1	1350	1004.52	84	30.936
XM_758087.1	1555	1265.64	281	82.1369
XM_758088.1	603	455.45	909	738.356
XM_758089.1	1995	1491.75	236	58.5274
XM_758090.1	4962	4542.39	1672	136.174
XM_758091.1	420	236.01	92	144.211
XM_758092.1	673	490.418	286	215.745
XM_758093.1	7086	6908.84	6791	363.639
XM_758094.1	720	440.508	92	77.2639
XM_758095.1	6840	5076.49	730	53.1988
XM_758096.1	2037	1642.11	137	30.8647
XM_758097.1	2967	2405.85	908	139.624
XM_758098.1	529	272.129	56	76.13
XM_758099.1	417	233.105	55	87.2879
XM_758100.1	951	753.235	192	94.3003
XM_758101.1	501	295.69	217	271.497
XM_758102.1	240	75.8143	466	2273.93
XM_758103.1	351	170.497	468	1015.48
XM_758104.1	1335	1068.63	266	92.0863
XM_758105.1	2217	1979.21	583	108.973
XM_758106.1	2253	2102.57	443	77.9461
XM_758107.1	1473	1263.62	528	154.582
XM_758108.1	1647	1544.27	1122	268.79
XM_758109.1	1443	1366.04	226	61.2052
XM_758110.1	5046	5825.07	1382	87.7705
XM_758111.1	1179	900.888	789	324.002
XM_758112.1	426	241.769	21	32.1337
XM_758113.1	1098	953.42	15	5.82035
XM_758114.1	276	104.312	19	67.3847
XM_758115.1	132	16.4466	7	157.457
XM_758116.1	714	549.226	123	82.8507
XM_758117.1	2871	2211.81	896	149.866
XM_758118.1	1041	750.775	22	10.8406
XM_758119.1	1107	854.379	27	11.6911
XM_758120.1	2520	2206.1	475	79.6546
XM_758121.1	1989	1690	327	71.5817
XM_758122.1	2139	1669.26	15	3.32437
XM_758123.1	453	195.662	80	151.26
XM_758124.1	1172	1024.45	332	119.892
XM_758125.1	2550	2376.97	1484	230.968
XM_758126.1	1530	1384.54	544	145.357
XM_758127.1	4366	3935.69	981	92.2126
XM_758128.1	2532	2228.85	798	132.454
XM_758129.1	1173	828.059	188	83.9921
XM_758130.1	1416	1073.68	159	54.7854
XM_758131.1	2097	2004.83	1264	233.245
XM_758132.1	1530	989.315	22	8.22679
XM_758133.1	903	629.29	74	43.5033
XM_758134.1	744	420.736	52	45.7231
XM_758135.1	1740	1488.02	1174	291.878
XM_758136.1	321	143.055	54	139.648
XM_758137.1	3324	3111.98	1162	138.137
XM_758138.1	3363	3278.74	9	1.01549
XM_758139.1	615	316.12	39	45.641
XM_758140.1	1517	1329.94	370	102.923
XM_758141.1	1487	1020.96	241	87.3271
XM_758142.1	543	380.509	2	1.94449
XM_758143.1	885	611.921	7	4.23199
XM_758144.1	882	668.932	3	1.65913
XM_758145.1	1512	1394.18	180	47.7635
XM_758146.1	414	229.223	57	91.9937
XM_758147.1	1251	1118.94	201	66.4557
XM_758148.1	561	287.078	179	230.672
XM_758149.1	1251	1052.13	1841	647.331
XM_758150.1	549	320.837	95	109.542
XM_758151.1	631	411.24	475	427.307
XM_758152.1	1500	1400.08	315	83.2336
XM_758153.1	441	236.435	57	89.1876
XM_758154.1	705	442.752	3	2.5067
XM_758155.1	1977	1967.93	503	94.5585
XM_758156.1	1563	1408.07	656	172.354
XM_758157.1	1895	1721.98	372	79.9201
XM_758158.1	1391	1012.7	279	101.922
XM_758159.1	759	510.564	13	9.41966
XM_758160.1	3171	2808.32	110	14.4907
XM_758161.1	2746	2372.45	945	147.359
XM_758162.1	5244	4778.14	1987	153.844
XM_758163.1	1396	858.966	254	109.396
XM_758164.1	1164	639.907	73	42.2035
XM_758165.1	1923	1276.43	130	37.6781
XM_758166.1	3930	2697.84	278	38.1216
XM_758167.1	4281	3421.76	9	0.973049
XM_758168.1	5220	4347.33	9	0.765881
XM_758169.1	2631	1822.39	549	111.448
XM_758170.1	1152	612.478	102	61.6101
XM_758171.1	933	645.911	25	14.3189
XM_758172.1	1785	1670.57	16	3.54321
XM_758173.1	1479	1122.8	307	101.153
XM_758174.1	1173	1045.83	372	131.591
XM_758175.1	1233	896.387	119	49.1127
XM_758176.1	2187	1599.94	365	84.3976
XM_758177.1	1113	801.14	65	30.0156
XM_758178.1	1218	1156.73	974	311.508
XM_758179.1	1066	872.022	294	124.727
XM_758180.1	420	186.364	15	29.7763
XM_758181.1	345	164.857	18	40.3931
XM_758182.1	1365	1311.95	1442	406.622
XM_758183.1	1782	1520.29	452	109.991
XM_758184.1	1107	810.033	140	63.9393
XM_758185.1	1353	1033.56	216	77.3147
XM_758186.1	594	411.337	152	136.706
XM_758187.1	1005	711.696	104	54.0606
XM_758188.1	2367	1752.92	797	168.204
XM_758189.1	1176	996.98	414	153.623
XM_758190.1	747	520.995	204	144.857
XM_758191.1	1680	1344.62	437	120.233
XM_758192.1	582	388.529	72	68.5568
XM_758193.1	3465	3057.97	17	2.05664
XM_758194.1	828	638.438	145	84.0217
XM_758195.1	2050	1555.53	676	160.772
XM_758196.1	828	664.88	295	164.142
XM_758197.1	660	316.515	68	79.4799
XM_758198.1	330	151.124	1	2.44798
XM_758199.1	534	274.242	3	4.04697
XM_758200.1	1134	828.773	102	45.5309
XM_758201.1	1080	827.114	436	195.013
XM_758202.1	522	255.584	34	49.2139
XM_758203.1	171	32.1114	53	610.603
XM_758204.1	1881	1578.14	263	61.6528
XM_758205.1	1383	1247.49	552	163.698
XM_758206.1	1494	1484.14	96	23.9297
XM_758207.1	1386	1343.42	165	45.4374
XM_758208.1	1326	1010.51	67	24.5289
XM_758209.1	1332	1119.75	93.8975	31.0225
XM_758210.1	1323	1183.59	100.102	31.2884
XM_758211.1	339	159.374	19	44.1039
XM_758212.1	2130	2117.54	25	4.36768
XM_758213.1	2103	1746.71	366	77.5179
XM_758214.1	1014	639.796	96	55.5101
XM_758215.1	1773	1443.09	267	68.448
XM_758216.1	336	156.553	54	127.607
XM_758217.1	8211	8911.7	4776	198.265
XM_758218.1	804	670.044	496	273.855
XM_758219.1	758	604.341	275	168.342
XM_758220.1	1326	958.633	198	76.4109
XM_758221.1	2529	2497.12	560	82.9643
XM_758222.1	1887	1711.57	45	9.72658
XM_758223.1	636	354.478	78	81.4044
XM_758224.1	2313	2538.83	12	1.7486
XM_758225.1	621	528.544	414	289.775
XM_758226.1	396	213	345	599.214
XM_758227.1	900	749.546	284	140.172
XM_758228.1	246	80.332	161	741.445
XM_758229.1	1425	1392.9	248	65.8681
XM_758230.1	2463	2589.82	301	42.9971
XM_758231.1	987	899.115	182	74.8856
XM_758232.1	480	295.069	85	106.571
XM_758233.1	1128	1056.22	205	71.8027
XM_758234.1	919	691.884	220	117.634
XM_758235.1	384	196.925	151	283.674
XM_758236.1	3129	3117.48	3493	414.512
XM_758237.1	195	45.2793	76	620.949
XM_758238.1	120	13.6329	77	2089.51
XM_758239.1	1062	956.716	313	121.033
XM_758240.1	1035	954.502	324	125.577
XM_758241.1	3120	3053.76	812	98.37
XM_758242.1	645	491.797	152	114.34
XM_758243.1	2580	2563.41	718	103.621
XM_758244.1	546	395.217	2	1.87213
XM_758245.1	804	595.014	207	128.702
XM_758246.1	573	434.359	266	226.556
XM_758247.1	922	760.43	234	113.841
XM_758248.1	537	325.619	112	127.248
XM_758249.1	201	49.1778	77	579.247
XM_758250.1	294	119.444	12	37.1672
XM_758251.1	315	137.684	11	29.5563
XM_758252.1	3378	2893.87	213	27.2297
XM_758253.1	663	527.501	97	68.0284
XM_758254.1	954	693.986	167	89.0242
XM_758255.1	1449	1287.23	377	108.349
XM_758256.1	2421	2216.17	249	41.5661
XM_758257.1	852	652.034	209	118.582
XM_758258.1	228	67.0351	49	270.418
XM_758259.1	747	516.928	59	42.2245
XM_758260.1	603	398.346	92	85.4416
XM_758261.1	3012	2364.59	372	58.2009
XM_758262.1	1881	1474.67	226	56.6965
XM_758263.1	1650	1223.93	55.9132	16.9005
XM_758264.1	1671	1321.51	234	65.5072
XM_758265.1	1614	1150.22	265.087	85.2605
XM_758266.1	1614	1179.47	269	84.3735
XM_758267.1	1659	1248.55	138	40.8897
XM_758268.1	1662	1228.24	89	26.807
XM_758269.1	1344	966.303	328	125.575
XM_758270.1	930	742.534	206	102.634
XM_758271.1	1437	1093.32	545	184.413
XM_758272.1	1706	1588.33	1961	456.749
XM_758273.1	1584	1302.68	285	80.9377
XM_758274.1	1374	1181.63	142.856	44.7258
XM_758275.1	1356	1118.71	739.144	244.429
XM_758276.1	1653	1273.5	258	74.9485
XM_758277.1	616	378.444	218	213.106
XM_758278.1	1475	1095.7	319	107.706
XM_758279.1	3462	2643.29	681	95.3114
XM_758280.1	270	99.3186	2	7.44975
XM_758281.1	264	94.516	1	3.91415
XM_758282.1	303	127.176	3	8.7269
XM_758283.1	360	178.925	1	2.06762
XM_758284.1	1506	1333.77	77	21.3575
XM_758285.1	525	277.873	13	17.3077
XM_758286.1	1368	1184.93	378	118.016
XM_758287.1	4062	3159.56	390	45.6646
XM_758288.1	948	681.291	2	1.08602
XM_758289.1	861	551.386	140	93.9322
XM_758290.1	570	524.537	19	13.4005
XM_758291.1	471	268.892	104	143.086
XM_758292.1	633	468.354	141	111.375
XM_758293.1	1329	1124.56	397	130.602
XM_758294.1	5160	3948.59	1082	101.374
XM_758295.1	873	694.749	70	37.2746
XM_758296.1	3036	2397.94	351	54.1515
XM_758297.1	539	297.051	221	275.235
XM_758298.1	374	211.482	384	671.737
XM_758299.1	1070	690.289	208	111.474
XM_758300.1	1356	1282.42	1089	314.153
XM_758301.1	1353	1022.7	634	229.341
XM_758302.1	4569	4199.59	1846	162.617
XM_758303.1	1624	1545.32	378	90.4934
XM_758304.1	4308	3644.63	863	87.5991
XM_758305.1	366	184.665	109	218.365
XM_758306.1	2700	2066.99	890	159.292
XM_758307.1	2211	1366.84	66	17.8636
XM_758308.1	1521	892.557	34	14.0924
XM_758309.1	777	447.374	69	57.0585
XM_758310.1	3028	2245.88	368	60.6183
XM_758311.1	837	618.574	66	39.4725
XM_758312.1	2991	2485.69	1615	240.363
XM_758313.1	276	104.312	146	517.798
XM_758314.1	1656	1419.87	800	208.442
XM_758315.1	588	329.005	70	78.7114
XM_758316.1	996	634.252	24	13.9988
XM_758317.1	672	337.752	59	64.6243
XM_758318.1	1134	840.672	98	43.1262
XM_758319.1	1377	1094.27	85	28.7367
XM_758320.1	4275	3604.8	1296	133.004
XM_758321.1	3134	2654.14	329	45.8579
XM_758322.1	4143	3527.52	1163	121.97
XM_758323.1	819	629.214	191	112.299
XM_758324.1	2463	2100.86	608	107.065
XM_758325.1	1022	781.219	219	103.708
XM_758326.1	2142	1493.19	9	2.22982
XM_758327.1	549	429.113	4	3.4485
XM_758328.1	822	599.229	134	82.7283
XM_758329.1	1791	1745.52	308	65.2781
XM_758330.1	3447	2859.59	585	75.6822
XM_758331.1	507	272.083	131	178.119
XM_758332.1	2040	2111.65	658	115.278
XM_758333.1	2760	2838.11	494	64.3931
XM_758334.1	822	604.853	399	244.042
XM_758335.1	1241	860.814	197	84.664
XM_758336.1	2601	2088.4	228	40.3891
XM_758337.1	651	407.36	69	62.6632
XM_758338.1	1473	1153.99	240	76.94
XM_758339.1	462	238.535	79	122.523
XM_758340.1	465	267.837	87	120.169
XM_758341.1	1542	1167.5	161	51.0167
XM_758342.1	561	359.931	253	260.042
XM_758343.1	2757	2265.76	865	141.236
XM_758344.1	1149	901.344	46	18.8803
XM_758345.1	285	111.695	182	602.811
XM_758346.1	846	557.748	48	31.838
XM_758347.1	1815	1758.4	6414	1349.44
XM_758348.1	889	609.99	196	118.871
XM_758349.1	1389	1261.5	527	154.549
XM_758350.1	684	416.671	60	53.2721
XM_758351.1	1875	1464.36	295	74.5277
XM_758352.1	1288	996.993	296	109.835
XM_758353.1	408	202.959	164	298.936
XM_758354.1	861	697.3	386	204.791
XM_758355.1	390	207.297	273	487.206
XM_758356.1	552	275.359	104	139.726
XM_758357.1	1176	741.595	98	48.8879
XM_758358.1	522	360.338	177	181.721
XM_758359.1	1077	854.777	211	91.3212
XM_758360.1	1701	1326	314	87.6045
XM_758361.1	849	608.044	232	141.155
XM_758362.1	351	170.497	4	8.67934
XM_758363.1	1749	1691.96	560	122.445
XM_758364.1	273	101.798	104	377.953
XM_758365.1	2382	2436.21	1159	175.999
XM_758366.1	2151	1420.71	226	58.8497
XM_758367.1	216	58.9077	289	1814.96
XM_758368.1	1402	1681.85	1124	247.242
XM_758369.1	714	598.48	429	265.186
XM_758370.1	1398	1275.83	502	145.564
XM_758371.1	516	340.891	124	134.57
XM_758372.1	869	692.457	587	313.608
XM_758373.1	690	542.67	519	353.813
XM_758374.1	989	762.133	851	413.087
XM_758375.1	444	308.731	426	510.472
XM_758376.1	480	241.629	81	124.016
XM_758377.1	3249	3126.06	362	42.8403
XM_758378.1	3345	3176.57	481	56.0182
XM_758379.1	1056	876.971	328	138.366
XM_758380.1	636	464.578	417	332.062
XM_758381.1	501	285.36	315	408.376
XM_758382.1	1161	902.113	143	58.6432
XM_758383.1	939	631.599	80	46.8588
XM_758384.1	354	173.356	84	179.26
XM_758385.1	1215	1062.72	247	85.9841
XM_758386.1	972	778.636	15	7.12687
XM_758387.1	3027	3175.22	1261	146.921
XM_758388.1	1575	862.07	128.922	55.3254
XM_758389.1	1578	852.439	178.463	77.4511
XM_758390.1	672	343.144	242	260.904
XM_758391.1	1575	846.34	213.391	93.2768
XM_758392.1	1566	853.272	281.081	121.867
XM_758393.1	1386	1143.9	779	251.936
XM_758394.1	1575	843.135	178.103	78.1479
XM_758395.1	1569	871.785	87.278	37.0371
XM_758396.1	1578	853.9	51.7616	22.4255
XM_758397.1	933	735.573	8	4.02352
XM_758398.1	547	364.613	157	159.298
XM_758399.1	2421	2326.47	440	69.9675
XM_758400.1	5691	4948.16	1134	84.7836
XM_758401.1	3750	3544.14	1598	166.805
XM_758402.1	987	646.096	489	279.997
XM_758403.1	436	269.557	826	1133.63
XM_758404.1	1978	1803.54	666	136.613
XM_758405.1	1970	1437.85	373.859	96.1915
XM_758406.1	378	195.913	100	188.834
XM_758407.1	276	104.312	310	1099.43
XM_758408.1	1365	1381.08	697	186.706
XM_758409.1	1380	1350.34	842	230.681
XM_758410.1	840	616.921	234	140.323
XM_758411.1	699	512.496	0	0
XM_758412.1	2276	2594.81	1564	222.984
XM_758413.1	4218	4858.32	2351	179.023
XM_758414.1	5091	5167.25	1528	109.397
XM_758415.1	1411	1338.45	446	123.275
XM_758416.1	642	413.45	1	0.894786
XM_758417.1	1035	953.859	251	97.349
XM_758418.1	3090	2933.3	647	81.5999
XM_758419.1	2157	1841.93	5	1.00424
XM_758420.1	381	211.662	81	141.574
XM_758421.1	1072	796.782	395	183.4
XM_758422.1	417	253.195	548	800.697
XM_758423.1	1815	1729.2	870	186.13
XM_758424.1	777	552.623	342	228.949
XM_758425.1	2865	3009.45	1113	136.82
XM_758426.1	2376	2180.6	686	116.383
XM_758427.1	5214	4393.48	606	51.0278
XM_758428.1	1875	1926.29	1726	331.482
XM_758429.1	3189	3257.93	2608	296.148
XM_758430.1	731	472.538	208.167	162.973
XM_758431.1	1184	1023.07	321.833	116.377
XM_758432.1	2808	2074.7	339	60.4487
XM_758433.1	1614	1472.14	255	64.0815
XM_758434.1	570	437.674	3	2.53579
XM_758435.1	1038	816.499	160	72.4947
XM_758436.1	876	550.987	200	134.286
XM_758437.1	1566	1319.76	377	105.679
XM_758438.1	410	185.725	155	308.747
XM_758439.1	615	375.38	31	30.5515
XM_758440.1	842	613.983	166	100.022
XM_758441.1	913	788.327	505	236.988
XM_758442.1	1818	1359.12	307	83.5645
XM_758443.1	456	207.646	56	99.7715
XM_758444.1	81	10.1579	77	2804.33
XM_758445.1	1095	852.63	192	83.3072
XM_758446.1	2714	2518.02	623	91.5317
XM_758447.1	1215	1091.88	281	95.2084
XM_758448.1	1130	852.666	614	266.398
XM_758449.1	486	357.379	125	129.397
XM_758450.1	1361	1210.73	755	230.696
XM_758451.1	426	248.492	181	269.468
XM_758452.1	2274	1780.27	632	131.332
XM_758453.1	2678	2324.53	515	81.9625
XM_758454.1	3219	2610.43	167	23.6671
XM_758455.1	549	474.067	4	3.1215
XM_758456.1	1359	1121.13	682	225.046
XM_758457.1	348	167.67	152	335.375
XM_758458.1	717	480.478	158	121.654
XM_758459.1	1188	870.686	136	57.7856
XM_758460.1	732	388.091	24	22.8781
XM_758461.1	2358	2131.14	38	6.59649
XM_758462.1	465	297.266	318	395.753
XM_758463.1	2697	2998.61	2754	339.77
XM_758464.1	1725	1586.59	614	143.168
XM_758465.1	468	275.141	161	216.477
XM_758466.1	522	341.97	174	188.236
XM_758467.1	2685	2991.83	2080	257.198
XM_758468.1	369	236.352	265	414.791
XM_758469.1	3183	3460.92	330	35.2748
XM_758470.1	1473	1254.92	145	42.7458
XM_758471.1	1470	1409.42	1101	288.994
XM_758472.1	1284	1182.84	529	165.452
XM_758473.1	3633	3544.96	379	39.5521
XM_758474.1	1632	1718.32	456	98.1753
XM_758475.1	483	344.712	332	356.307
XM_758476.1	1494	1460.67	102	25.8338
XM_758477.1	525	363.527	285	290.035
XM_758478.1	1638	1816.1	3349	682.211
XM_758479.1	1624	1750.71	1007	212.793
XM_758480.1	1542	1405.75	231	60.7921
XM_758481.1	1911	1866.26	234	46.3859
XM_758482.1	1023	775.119	464	221.458
XM_758483.1	912	736.497	52	26.1201
XM_758484.1	2674	2401.72	4114	633.7
XM_758485.1	357	176.07	91	191.204
XM_758486.1	798	382.247	99	95.815
XM_758487.1	2208	1624.32	618	140.753
XM_758488.1	2436	1528.53	282	68.2522
XM_758489.1	1138	770.466	230	110.438
XM_758490.1	4134	3241.14	278	31.7314
XM_758491.1	1974	1313.06	340	95.7939
XM_758492.1	1344	985.32	149	55.9437
XM_758493.1	2682	2642.89	845	118.282
XM_758494.1	975	684.911	395	213.356
XM_758495.1	2371	1840.65	874	175.663
XM_758496.1	1785	1458.61	253	64.1689
XM_758497.1	1689	1622.01	31.6767	7.22483
XM_758498.1	1536	1416.21	38.3233	10.011
XM_758499.1	579	351.86	310	325.938
XM_758500.1	3656	2783.27	2178	289.498
XM_758501.1	305	128.986	202	579.363
XM_758502.1	1950	1393.83	569	151.023
XM_758503.1	306	129.877	75	213.635
XM_758504.1	1638	1459.14	1285	325.797
XM_758505.1	285	111.695	63	208.665
XM_758506.1	1883	1304.74	529	149.994
XM_758507.1	1650	1305.15	32	9.07053
XM_758508.1	2862	2367.73	703	109.841
XM_758509.1	465	242.92	289	440.126
XM_758510.1	973	655.497	659	371.926
XM_758511.1	1548	1332.86	925	256.743
XM_758512.1	678	527.192	1041	730.507
XM_758513.1	1074	866.511	977	417.121
XM_758514.1	1380	1251.81	374	110.528
XM_758515.1	1374	1237.58	247	73.8359
XM_758516.1	924	589.876	39	24.4594
XM_758517.1	918	568.903	78	50.7223
XM_758518.1	744	424.986	101	87.9202
XM_758519.1	372	190.206	24	46.6798
XM_758520.1	513	268.474	159	219.097
XM_758521.1	1209	858.38	100	43.0985
XM_758522.1	1693	1449.48	1263	322.355
XM_758523.1	423	262.056	24	33.8812
XM_758524.1	411	262.299	30	42.3124
XM_758525.1	4743	3374.29	1749	191.756
XM_758526.1	5367	4040.72	3215	294.35
XM_758527.1	876	631.852	1045	611.847
XM_758528.1	1420	1227.6	2071	624.116
XM_758529.1	1330	1096.73	1135	382.858
XM_758530.1	897	530.492	116	80.8949
XM_758531.1	582	283.069	126	164.672
XM_758532.1	4530	3657.02	117	11.8359
XM_758533.1	1419	1190.03	386	119.997
XM_758534.1	372	189.844	133	259.178
XM_758535.1	405	212.575	14	24.3645
XM_758536.1	1104	774.038	188	89.854
XM_758537.1	915	787.589	2931	1376.76
XM_758538.1	461	256.578	529	762.743
XM_758539.1	448	230.207	699	1123.31
XM_758540.1	441	237.549	239	372.209
XM_758541.1	492	258.579	178	254.665
XM_758542.1	1500	1008.9	804	294.814
XM_758543.1	3471	2790.22	755	100.104
XM_758544.1	504	314.499	448	526.989
XM_758545.1	770	550.102	404	271.694
XM_758546.1	423	186.265	225	446.881
XM_758547.1	1968	1838.17	659	132.63
XM_758548.1	2487	1962.7	810	152.677
XM_758549.1	1347	900.318	67.1547	27.5945
XM_758550.1	1410	991.666	309.562	115.485
XM_758551.1	1680	1292.61	86.8605	24.8597
XM_758552.1	1437	1069.09	34.7253	12.0163
XM_758553.1	621	306.208	12.5415	15.1522
XM_758554.1	1320	1074.94	34	11.7014
XM_758555.1	1884	1555.55	68	16.1722
XM_758556.1	1740	1396.06	29	7.68487
XM_758557.1	1527	1234.38	379	113.588
XM_758558.1	1356	929.206	289	115.061
XM_758559.1	1194	804.992	41	18.8423
XM_758560.1	1146	732.799	60	30.2906
XM_758561.1	1310	923.057	26	10.4205
XM_758562.1	1857	1315.74	166	46.6747
XM_758563.1	4542	3516.25	476.879	50.173
XM_758564.1	3300	2183.49	99	16.7736
XM_758565.1	2010	1437.35	297	76.4426
XM_758566.1	900	526.543	66	46.3716
XM_758567.1	726	414.517	445	397.154
XM_758568.1	1689	1120.48	154	50.8464
XM_758569.1	2910	2394.87	613	94.6936
XM_758570.1	1689	1125.57	43	14.1332
XM_758571.1	2106	1699.48	374	81.414
XM_758572.1	2967	2078.94	465	82.7472
XM_758573.1	1191	981.684	482	181.643
XM_758574.1	711	460.837	176	141.289
XM_758575.1	1305	1047.62	139	49.0857
XM_758576.1	753	521.517	200	141.874
XM_758577.1	1199	1109.94	344	114.657
XM_758578.1	955	757.725	984	480.425
XM_758579.1	382	199.792	79	146.282
XM_758580.1	763	436.108	59	50.0495
XM_758581.1	2301	2002.81	431	79.6121
XM_758582.1	731	440.023	171	143.768
XM_758583.1	828	526.651	139	97.6415
XM_758584.1	1084	717.059	138	71.1978
XM_758585.1	648	447.642	154	127.272
XM_758586.1	3258	2787.43	744	98.7441
XM_758587.1	741	460.792	174	139.697
XM_758588.1	761	510.293	181	131.22
XM_758590.1	1374	1138.91	702	228.029
XM_758591.1	534	312.044	111	131.598
XM_758592.1	534	333.439	1568	1739.69
XM_758593.1	1443	1390.25	10863	2890.67
XM_758594.1	650	352.832	73	76.5416
XM_758595.1	459	289.455	18	23.0056
XM_758596.1	1812	1212.43	231	70.4849
XM_758597.1	1206	984.986	233	87.5121
XM_758598.1	282	109.255	73	247.185
XM_758599.1	2771	2345.35	801	126.348
XM_758600.1	1386	1098.24	31	10.4425
XM_758601.1	672	450.649	646	530.318
XM_758602.1	602	319.261	149	172.656
XM_758603.1	735	457.292	143	115.687
XM_758604.1	603	394.174	108	101.363
XM_758605.1	1251	1009.21	325	119.136
XM_758606.1	1571	1083.43	516	176.194
XM_758607.1	1464	988.717	216	80.8209
XM_758608.1	1971	1934.39	2634	503.749
XM_758609.1	3591	2949.6	609	76.3831
XM_758610.1	702	422.043	158	138.498
XM_758611.1	687	432.265	132	112.971
XM_758612.1	219	60.9636	69	418.717
XM_758613.1	465	310.705	1085	1291.88
XM_758614.1	2895	2506.33	614	90.6302
XM_758615.1	1140	915.594	349	141.015
XM_758616.1	858	655.26	322	181.796
XM_758617.1	2183	1881.59	630	123.868
XM_758618.1	447	230.655	595	954.324
XM_758619.1	168	30.5324	42	508.898
XM_758620.1	1104	962.675	302	116.057
XM_758621.1	1237	906.935	362	147.664
XM_758622.1	2358	1882.39	753	147.988
XM_758623.1	2808	2500.63	892	131.965
XM_758624.1	624	476.402	373	289.653
XM_758625.1	786	604.605	182	111.363
XM_758626.1	2172	1985.5	0	0
XM_758627.1	597	410.63	0	0
XM_758628.1	651	429.546	1	0.861257
XM_758629.1	1071	806.764	5	2.2928
XM_758630.1	2538	2292.71	991	159.907
XM_758631.1	1695	1593.19	1147	266.341
XM_758632.1	753	608.996	630	382.709
XM_758633.1	1107	885.337	1000	417.863
XM_758634.1	330	151.124	84	205.63
XM_758635.1	1344	1410.2	1661	435.745
XM_758636.1	399	240.616	466	716.479
XM_758637.1	669	515.408	2	1.43556
XM_758638.1	867	648.512	7	3.99321
XM_758639.1	924	771.921	7	3.3548
XM_758640.1	807	480.156	27	20.8029
XM_758641.1	867	597.585	84	52.0022
XM_758642.1	822	665.604	24	13.3394
XM_758643.1	1080	880.463	1	0.420176
XM_758644.1	729	485.106	5	3.81308
XM_758645.1	855	682.588	4	2.16792
XM_758646.1	447	254.17	18	26.1993
XM_758647.1	1329	1511.64	608	148.798
XM_758648.1	2187	1983.85	382	71.2355
XM_758649.1	880	591.885	313	195.636
XM_758650.1	468	290.346	291	370.782
XM_758651.1	357	220.903	161	269.629
XM_758652.1	504	395.763	695	649.669
XM_758653.1	1191	966.455	634	242.689
XM_758654.1	1455	1115.14	649	215.307
XM_758655.1	982	705.517	471.801	247.397
XM_758656.1	597	431.098	73	62.6454
XM_758657.1	711	503.945	49	35.9712
XM_758658.1	1197	1081.65	36	12.3128
XM_758659.1	1113	979.092	222.199	83.9578
XM_758660.1	1021	763.07	234	113.447
XM_758661.1	1065	854.669	937	405.587
XM_758662.1	1185	1039.02	1007	358.549
XM_758663.1	345	189.926	247	481.122
XM_758664.1	1386	1439.78	69	17.7295
XM_758665.1	213	57.0139	7	45.4213
XM_758666.1	1434	1410.29	1521	398.992
XM_758667.1	894	758.226	1246	607.941
XM_758668.1	1827	1353.65	1	0.273298
XM_758669.1	1991	1562.52	467.035	110.577
XM_758670.1	1764	1347.82	19	5.21513
XM_758671.1	1383	1146.66	1487	479.756
XM_758672.1	534	297.508	67	83.3141
XM_758673.1	444	242.886	50	76.157
XM_758674.1	357	176.07	67	140.777
XM_758675.1	510	256.015	55	79.4766
XM_758676.1	924	640.012	98	56.6474
XM_758677.1	1128	784.649	6	2.8289
XM_758678.1	702	454.805	3	2.44027
XM_758679.1	1578	1291.68	319	91.3647
XM_758680.1	1242	955.996	282	109.128
XM_758681.1	1536	1244.69	316	93.9224
XM_758682.1	6273	5628.42	821	53.9634
XM_758683.1	1848	1405.84	430	113.156
XM_758684.1	481	288.521	1036	1328.39
XM_758685.1	453	226.986	88	143.425
XM_758686.1	1113	771.955	84	40.2559
XM_758687.1	3915	3940.09	11.8158	1.10943
XM_758688.1	930	534.931	101	69.8498
XM_758689.1	1653	1352.79	301	82.3151
XM_758690.1	1001	637.581	80	46.4191
XM_758691.1	1131	677.803	236	128.81
XM_758692.1	564	470.722	82	64.4454
XM_758693.1	987	716.33	305	157.518
XM_758694.1	1296	987.94	418	156.526
XM_758695.1	7311	4932.04	1535	115.139
XM_758696.1	542	275.653	149	199.971
XM_758697.1	477	294.973	28	35.117
XM_758698.1	1209	898.378	208	85.6537
XM_758699.1	1518	1063.43	95	33.049
XM_758700.1	1701	1211.73	230	70.2205
XM_758701.1	1617	1226.17	785	236.843
XM_758702.1	260	91.352	129	522.413
XM_758703.1	557	295.172	250	313.333
XM_758704.1	351	170.497	622	1349.64
XM_758705.1	627	407	147	133.618
XM_758706.1	1545	1258.26	173	50.865
XM_758707.1	2127	1755.22	950	200.233
XM_758708.1	3087	2591.74	1179	168.292
XM_758709.1	873	591.365	46	28.7769
XM_758710.1	726	456.834	40	32.3924
XM_758711.1	1235	795.958	169	78.5487
XM_758712.1	1041	674.188	22	12.0721
XM_758713.1	973	546.146	199	134.799
XM_758714.1	2739	2311.01	225	36.0183
XM_758715.1	1314	1060.85	343	119.614
XM_758716.1	2958	2507.96	1488	219.495
XM_758717.1	3561	3621.85	2062	210.621
XM_758718.1	720	368.809	160	160.495
XM_758719.1	999	590.916	158	98.9176
XM_758720.1	1440	1183.89	1	0.312485
XM_758721.1	1095	864.044	1595	682.915
XM_758722.1	237	73.5742	148	744.181
XM_758723.1	204	51.2222	40	288.898
XM_758724.1	3696	3487.37	1306	138.544
XM_758725.1	1905	1492.52	87	21.5645
XM_758726.1	1791	1286.97	112	32.1953
XM_758727.1	2427	1488.06	374	92.9805
XM_758728.1	750	526.692	86	60.4065
XM_758729.1	1158	1095.77	396	133.695
XM_758730.1	600	339.086	47	51.2778
XM_758731.1	776	458.051	88	71.074
XM_758732.1	225	65.0444	14	79.6269
XM_758733.1	846	577.074	27	17.3091
XM_758734.1	333	153.825	20	48.1
XM_758735.1	1068	760.797	102	49.5991
XM_758736.1	1077	934.492	356	140.934
XM_758737.1	783	580.656	247	157.369
XM_758738.1	1395	1359.47	289	78.6451
XM_758739.1	522	267.804	79	109.132
XM_758740.1	567	297.889	17	21.1124
XM_758741.1	858	701.578	10	5.2731
XM_758742.1	594	367.154	103	103.784
XM_758743.1	989	758.873	369	179.887
XM_758744.1	704	454.13	78	63.5414
XM_758745.1	351	170.497	77	167.077
XM_758746.1	1413	1157.15	248	79.2874
XM_758747.1	1881	1653.55	169	37.8104
XM_758748.1	2108	1589.39	143	33.2849
XM_758749.1	591	350.527	76	80.211
XM_758750.1	306	129.877	88	250.665
XM_758751.1	4308	4203.96	185	16.28
XM_758752.1	1155	813.849	154	70.0034
XM_758753.1	3741	3343.75	72	7.96601
XM_758754.1	813	603.02	21	12.8834
XM_758755.1	2773	2327.14	719	114.301
XM_758756.1	4116	3102.22	1056	125.931
XM_758757.1	846	637.472	304	176.423
XM_758758.1	3264	2943.29	1709	214.808
XM_758759.1	431	200.643	454	837.092
XM_758760.1	2916	2638.75	1579	221.373
XM_758761.1	2046	2421.53	1698	259.412
XM_758762.1	1305	941.405	484	190.2
XM_758763.1	549	327.343	2	2.26031
XM_758764.1	1401	1233.82	304	91.1519
XM_758765.1	147	21.5998	39	667.97
XM_758766.1	1299	936.085	487	192.467
XM_758767.1	488	289.453	159	203.217
XM_758768.1	2382	1677.3	315	69.4771
XM_758769.1	5148	4713.36	747	58.6317
XM_758770.1	2766	2549.02	90	13.0621
XM_758771.1	1479	1282.76	468	134.971
XM_758772.1	1046	1058.57	1241	433.703
XM_758773.1	3429	2895.21	73	9.32792
XM_758774.1	2655	2081.87	273	48.5123
XM_758775.1	1008	918.633	304	122.426
XM_758776.1	1089	867.343	151	64.4063
XM_758777.1	597	407.674	200	181.493
XM_758778.1	938	690.858	379	202.952
XM_758779.1	634	436.588	107	90.668
XM_758780.1	348	167.67	648	1429.75
XM_758781.1	1222	1137	1076	350.102
XM_758782.1	984	684.189	93	50.2862
XM_758783.1	4290	4758.68	2463	191.478
XM_758784.1	1164	961.295	336	129.308
XM_758785.1	1087	808.756	366	167.419
XM_758786.1	1494	1455.57	477	121.235
XM_758787.1	2451	2407.87	141	21.6635
XM_758788.1	2202	1909.95	26	5.0361
XM_758789.1	2592	2193.79	1	0.168635
XM_758790.1	1698	1477.87	842	210.774
XM_758791.1	1035	945.314	362	141.669
XM_758792.1	627	448.666	272	224.278
XM_758793.1	2067	1922.68	997	191.836
XM_758794.1	1950	1408.52	557.57	146.447
XM_758795.1	1407	1252.6	391	115.48
XM_758796.1	663	447.44	32	26.458
XM_758797.1	2070	1757.82	504	106.071
XM_758798.1	1515	1462.85	327	82.6971
XM_758799.1	1031	807.219	537.583	246.375
XM_758800.1	2916	2733.94	1629.42	220.488
XM_758801.1	414	205.194	117	210.942
XM_758802.1	2898	2806.58	911	120.084
XM_758803.1	1149	803.458	489	225.158
XM_758804.1	276	104.312	9	31.919
XM_758805.1	2748	2997	2594	320.203
XM_758806.1	1668	1785.42	562	116.449
XM_758807.1	2235	2216.58	446	74.4379
XM_758808.1	763	450.797	712	584.307
XM_758809.1	1020	913.515	134	54.2664
XM_758810.1	2419	2402.57	2286	352
XM_758811.1	714	651.334	106	60.2067
XM_758812.1	1686	1942.72	981	186.811
XM_758813.1	726	573.742	126	81.2449
XM_758814.1	1599	1418.23	195	50.8663
XM_758815.1	1065	1107.56	119	39.7487
XM_758816.1	393	210.085	29	51.0674
XM_758817.1	7218	6319.83	403	23.5907
XM_758818.1	852	630.026	43	25.2495
XM_758819.1	606	414.372	647	577.639
XM_758820.1	846	479.456	130	100.308
XM_758821.1	882	506.288	131	95.7229
XM_758822.1	3394	2616.28	330	46.6629
XM_758823.1	306	129.877	119	338.967
XM_758824.1	686	420.662	776	682.45
XM_758825.1	621	446.859	67	55.4685
XM_758826.1	1290	994.308	263	97.8536
XM_758827.1	1432	1290.37	410	117.547
XM_758828.1	1110	771.587	119	57.0564
XM_758829.1	3606	3005.39	598	73.6111
XM_758830.1	1112	1070.73	2539	877.252
XM_758831.1	720	489.516	526	397.521
XM_758832.1	1294	1080.45	294	100.666
XM_758833.1	717	736.607	453	227.512
XM_758834.1	1173	887.032	530	221.044
XM_758835.1	1281	1090.26	257	87.2055
XM_758836.1	1269	993.31	137	51.0244
XM_758837.1	2343	2449.87	1666	251.579
XM_758838.1	117	12.8872	60	1722.4
XM_758839.1	2784	2508.29	973	143.508
XM_758840.1	330	151.124	113	276.622
XM_758841.1	537	332.821	138	153.395
XM_758842.1	1398	1135.05	211	68.7715
XM_758843.1	522	281.164	186	244.734
XM_758844.1	1419	1113.83	442	146.806
XM_758845.1	557	351.275	576	606.621
XM_758846.1	168	30.5324	133	1611.51
XM_758847.1	2796	2612.95	240	33.9799
XM_758848.1	1659	1676.14	178	39.2872
XM_758849.1	1062	738.686	387	193.818
XM_758850.1	587	373.33	313	310.166
XM_758851.1	763	516.416	1190	852.49
XM_758852.1	1377	956.947	112	43.2985
XM_758853.1	2565	2407.61	1444	221.882
XM_758854.1	423	219.584	182	306.628
XM_758855.1	879	793.061	600	279.89
XM_758856.1	717	554.186	4	2.67022
XM_758857.1	667	519.83	423	301.038
XM_758858.1	2328	2108.06	8564	1502.92
XM_758859.1	719	578.227	515	329.497
XM_758860.1	1074	982.781	458	172.405
XM_758861.1	783	630.237	211	123.857
XM_758862.1	378	206.056	143	256.74
XM_758863.1	411	251.424	48174	70883.8
XM_758864.1	384	195.432	28837	54587.9
XM_758865.1	2649	2338.46	505	79.8921
XM_758866.1	795	611.99	276	166.842
XM_758867.1	1164	989.041	195	72.9395
XM_758868.1	861	703.407	42	22.0895
XM_758869.1	1524	1337.5	0	0
XM_758870.1	2439	1964.95	6	1.12964
XM_758871.1	1431	1107.36	293	97.8864
XM_758872.1	1914	1393.46	316	83.8949
XM_758873.1	363	181.834	78	158.695
XM_758874.1	480	273.353	159	215.186
XM_758875.1	765	501.211	231	170.503
XM_758876.1	3708	3530.26	735	77.0234
XM_758877.1	1326	1039.33	4	1.4238
XM_758878.1	294	119.444	1	3.09727
XM_758879.1	1497	1148.61	7	2.25458
XM_758880.1	758	505.441	113	82.7085
XM_758881.1	1935	1596.17	31	7.18498
XM_758882.1	3573	3748.06	1240	122.393
XM_758883.1	922	693.581	930	496.053
XM_758884.1	960	797.518	292	135.452
XM_758885.1	1650	1653.45	384	85.9178
XM_758886.1	3672	2935.49	659	83.0514
XM_758887.1	1449	1133.78	557	181.748
XM_758888.1	768	491.075	41	30.8872
XM_758889.1	368	186.552	174	345.058
XM_758890.1	1815	1585.44	355	82.8363
XM_758891.1	732	396.579	2	1.8657
XM_758892.1	553	306.324	187	225.841
XM_758893.1	744	536.639	144	99.271
XM_758894.1	2151	1671.72	32	7.08156
XM_758895.1	1992	1434.55	197	50.8034
XM_758896.1	6399	4941.22	429	32.1192
XM_758897.1	1314	842.891	152	66.7136
XM_758898.1	780	512.977	112	80.7722
XM_758899.1	1572	1438.27	492	126.551
XM_758900.1	1049	738.348	268	134.281
XM_758901.1	3331	2707.85	582	79.5133
XM_758902.1	1227	1123.17	175	57.6413
XM_758903.1	1011	821.789	174	78.3306
XM_758904.1	1737	1502.27	154	37.9241
XM_758905.1	3372	3815.87	2805	271.946
XM_758906.1	3210	2738.72	586	79.1575
XM_758907.1	2304	1821.14	355	72.1151
XM_758908.1	831	716.68	358	184.799
XM_758909.1	1284	1106.84	339	113.307
XM_758910.1	948	840.292	255	112.267
XM_758911.1	2877	2628.27	570	80.232
XM_758912.1	5181	4414.76	1074	89.9994
XM_758913.1	618	395.061	113	105.817
XM_758914.1	1800	1520.88	330	80.2716
XM_758915.1	1689	1618.17	543	124.142
XM_758916.1	1118	882.998	569	238.394
XM_758917.1	921	807.35	63	28.8683
XM_758918.1	870	663.184	219	122.167
XM_758919.1	3678	2935.1	686	86.4656
XM_758921.1	585	264.832	71	99.1813
XM_758922.1	1044	894.416	336	138.977
XM_758923.1	1357	922.171	356	142.817
XM_758924.1	1467	1192.02	484	150.212
XM_758925.1	1185	1388.59	6078	1619.3
XM_758926.1	1191	1148.33	1079	347.612
XM_758927.1	780	676.558	346	189.196
XM_758928.1	771	572.573	114	73.6573
XM_758929.1	684	496.879	880	655.2
XM_758930.1	3522	2669.16	109	15.1076
XM_758931.1	1890	1618.4	748	170.985
XM_758932.1	519	281.599	17	22.3336
XM_758933.1	537	321.968	65	74.6865
XM_758934.1	372	190.206	57	110.865
XM_758935.1	738	682.123	599	324.868
XM_758936.1	524	245.504	669	1008.11
XM_758937.1	1263	989.055	476	178.044
XM_758938.1	1567	1353.35	550	150.347
XM_758939.1	1131	935.492	300	118.638
XM_758940.1	3957	3467.58	1158	123.545
XM_758941.1	1074	926.913	27	10.7762
XM_758942.1	2184	1931.68	436	83.5014
XM_758943.1	465	238.952	73	113.02
XM_758944.1	2025	1966.17	625	117.598
XM_758945.1	829	577.088	173	110.904
XM_758946.1	428	239.076	27323	42279.9
XM_758947.1	2157	2018.52	392	71.8447
XM_758948.1	904	636.415	330	191.83
XM_758949.1	1440	1001.89	2	0.738501
XM_758950.1	699	453.784	2	1.63051
XM_758951.1	3741	3534.15	1086	113.681
XM_758952.1	1683	1413.18	858	224.611
XM_758953.1	237	73.5742	31	155.876
XM_758954.1	678	498.756	91	67.4986
XM_758955.1	708	584.707	243	153.748
XM_758956.1	2307	2152.75	503	86.4404
XM_758957.1	873	717.724	258	132.985
XM_758958.1	1503	1307.33	653	184.787
XM_758959.1	1905	1735.34	53	11.2988
XM_758960.1	225	65.0444	14	79.6269
XM_758961.1	444	226.368	17	27.7828
XM_758962.1	1671	1380.3	27	7.23654
XM_758963.1	844	769.701	920	442.189
XM_758964.1	390	184.522	68	136.333
XM_758965.1	2397	2750.96	220	29.5856
XM_758966.1	3123	3164.78	1890	220.933
XM_758967.1	1308	1169.61	18	5.69344
XM_758968.1	2706	2465.58	2436	365.51
XM_758969.1	2634	2198.62	132	22.2109
XM_758970.1	1239	1316.07	126	35.4188
XM_758971.1	354	173.356	23	49.0831
XM_758972.1	537	273.562	110	148.758
XM_758973.1	1806	1400.29	317	83.7495
XM_758974.1	1833	1464.03	357	90.2111
XM_758975.1	1398	864.238	171	73.1989
XM_758976.1	1149	1006.77	337	123.834
XM_758977.1	5415	4794.1	695	53.6315
XM_758978.1	1320	1125.66	389	127.845
XM_758979.1	2775	2616.6	2781	393.192
XM_758980.1	1704	1343.42	67.1697	18.4971
XM_758981.1	1781	1497.15	1248.83	308.59
XM_758982.1	2232	1982.39	869	162.171
XM_758983.1	1476	1540.75	686	164.715
XM_758984.1	1404	1082.24	164	56.0609
XM_758985.1	1362	1121.02	350	115.504
XM_758986.1	906	660.191	427	239.277
XM_758987.1	960	707.896	4	2.09042
XM_758988.1	1044	804.451	3	1.37963
XM_758989.1	1036	761.953	220	106.816
XM_758990.1	2406	2109.24	127	22.2751
XM_758991.1	1206	910.477	80	32.506
XM_758992.1	1026	640.258	73	42.1803
XM_758993.1	387	204.526	94	170.028
XM_758994.1	165	29.1622	69	875.328
XM_758995.1	978	704.696	351	184.267
XM_758996.1	3036	2989.71	593	73.3783
XM_758997.1	1671	1527.22	4	0.968945
XM_758998.1	879	795.864	34	15.8045
XM_758999.1	1378	1227.62	253	76.2427
XM_759000.1	2172	1553.32	175	41.6791
XM_759001.1	2055	2005.84	129	23.7923
XM_759002.1	1824	1781.76	267	55.4376
XM_759003.1	1385	1208.75	916	280.35
XM_759004.1	1800	1500.47	625	154.097
XM_759005.1	2103	1785.91	720	149.147
XM_759006.1	753	579.835	353	225.223
XM_759007.1	1224	1080.1	145	49.6644
XM_759008.1	504	217.693	79	134.253
XM_759009.1	549	315.544	75	87.9313
XM_759010.1	2430	1941.12	305	58.1287
XM_759011.1	345	164.857	91	204.209
XM_759012.1	2127	1511.47	262	64.1276
XM_759013.1	279	106.76	64	221.776
XM_759014.1	2604	2250.65	173	28.4368
XM_759015.1	3663	2905.06	335	42.661
XM_759016.1	1984	1551.32	418	99.6819
XM_759017.1	1238	943.612	186	72.9225
XM_759018.1	150	22.8321	50	810.152
XM_759019.1	2350	1984.15	905	168.74
XM_759020.1	3327	2917.31	238	30.1812
XM_759021.1	546	278.8	1	1.32693
XM_759022.1	444	186.284	1	1.98594
XM_759023.1	464	236.167	451	706.478
XM_759024.1	1838	1483.65	348	86.7739
XM_759025.1	3087	2435.28	326	49.5235
XM_759026.1	1734	1742.89	1260	267.45
XM_759027.1	2907	2597.34	630	89.7335
XM_759028.1	552	277.433	18	24.0025
XM_759029.1	1308	1049.93	633	223.042
XM_759030.1	558	351.185	54	56.8853
XM_759031.1	261	92.1555	29	116.418
XM_759032.1	315	137.684	29	77.9211
XM_759033.1	633	403.986	66	60.4394
XM_759034.1	1311	1203.71	1259	386.941
XM_759035.1	916	651.699	790	448.458
XM_759036.1	2043	1968.69	588	110.495
XM_759037.1	1788	1256.1	253	74.5142
XM_759038.1	1548	1274.58	311	90.2686
XM_759039.1	1111	773.746	225	107.579
XM_759040.1	420	199.647	9	16.6771
XM_759041.1	603	396.733	16	14.9198
XM_759042.1	3279	2464.89	633	95.0053
XM_759043.1	3135	2654.06	220	30.6658
XM_759044.1	2293	1720.55	657	141.267
XM_759045.1	791	426.111	65	56.433
XM_759046.1	1678	1343.67	539	148.402
XM_759047.1	225	65.0444	25	142.191
XM_759048.1	2433	1587.93	186	43.3334
XM_759049.1	4686	3601.15	871	89.4786
XM_759050.1	1599	1233.71	205	61.4726
XM_759051.1	1032	698.838	293	155.108
XM_759052.1	1662	1423.33	487	126.581
XM_759053.1	531	203.931	38	68.9355
XM_759054.1	1137	718.317	86	44.2919
XM_759055.1	432	195.895	43	81.2059
XM_759056.1	1620	1384.42	649	173.428
XM_759057.1	930	613.192	223	134.54
XM_759058.1	327	148.434	172	428.683
XM_759059.1	948	579.624	89	56.8049
XM_759060.1	3351	2995.25	614	75.8365
XM_759061.1	3324	2783.05	908	120.7
XM_759062.1	2917	2423.66	753	114.939
XM_759063.1	707	489.591	86	64.9841
XM_759064.1	2070	1662.2	683	152.013
XM_759065.1	5478	3951.48	1412	132.195
XM_759066.1	2355	1661.02	382	85.0806
XM_759067.1	1251	946.38	119	46.5183
XM_759068.1	966	797.837	666	308.818
XM_759069.1	1143	881.953	164	68.7924
XM_759070.1	2262	1972	381	71.4759
XM_759071.1	327	148.434	75	186.926
XM_759072.1	2508	2198.61	702	118.122
XM_759073.1	249	82.6109	41	183.607
XM_759074.1	621	397.981	152	141.294
XM_759075.1	774	518.898	179	127.618
XM_759076.1	475	289.566	46	58.7695
XM_759077.1	1083	928.468	51	20.321
XM_759078.1	2910	2291.23	238	38.4282
XM_759079.1	1681	1220.75	463	140.312
XM_759080.1	936	741.136	215	107.321
XM_759081.1	243	78.0396	8	37.9243
XM_759082.1	1461	1302.77	404	114.724
XM_759083.1	3633	3297.16	1222	137.111
XM_759084.1	596	425.4	339	294.811
XM_759085.1	105	12.0785	32	980.12
XM_759086.1	3003	2212.45	129	21.5704
XM_759087.1	630	391.303	120	113.452
XM_759088.1	828	474.344	157	122.447
XM_759089.1	309	132.449	52	145.244
XM_759090.1	1131	856.743	236	101.907
XM_759091.1	2082	1915.44	1087	209.943
XM_759092.1	1039	751.555	365	179.669
XM_759093.1	1335	1009.54	287	105.172
XM_759094.1	1103	703.279	190	99.9466
XM_759095.1	871	630.686	126	73.9094
XM_759096.1	405	185.064	50	99.9518
XM_759097.1	372	190.206	25	48.6248
XM_759098.1	2640	2113.49	261	45.686
XM_759099.1	4851	4131.08	303	27.1344
XM_759100.1	678	410.894	26	23.4091
XM_759101.1	323	144.89	29	74.0461
XM_759102.1	1098	920.577	480	192.896
XM_759103.1	1748	1421.13	1334	347.267
XM_759104.1	1908	1971.65	1270	238.296
XM_759105.1	1315	1195.84	1948	602.638
XM_759106.1	135	17.4459	22	466.522
XM_759107.1	534	397.669	60	55.8176
XM_759108.1	582	336.74	321	352.657
XM_759109.1	659	483.746	277	211.838
XM_759110.1	606	336.691	190	208.768
XM_759111.1	1351	1148.73	193	62.1558
XM_759112.1	303	127.176	134	389.801
XM_759113.1	2193	2335.18	385	60.9932
XM_759114.1	2463	2026.5	702	128.154
XM_759115.1	4149	4019.2	580	53.3863
XM_759116.1	2280	2182.39	945	160.192
XM_759117.1	1272	1046.03	198	70.0267
XM_759118.1	1344	1080.02	339.832	116.405
XM_759119.1	1166	933.813	593.168	234.996
XM_759120.1	1860	1706.75	391	84.7519
XM_759121.1	812	479.213	161	124.291
XM_759122.1	1942	1866.68	2317	459.196
XM_759124.1	225	65.0444	0	0
XM_759125.1	144	20.6398	4	71.6962
XM_759126.1	216	58.9077	0	0
XM_759127.1	261	92.1555	26	104.374
XM_759128.1	1245	1074.81	239	82.2635
XM_759129.1	1686	1547.03	552	132.002
XM_759130.1	2253	2285.35	2850	461.353
XM_759131.1	414	218.547	62	104.951
XM_759132.1	3747	3055.18	2	0.242178
XM_759133.1	792	545.109	3	2.03601
XM_759134.1	3477	2886.19	1243	159.327
XM_759135.1	798	613.744	108	65.0997
XM_759136.1	2262	1647.29	412	92.5274
XM_759137.1	5325	4492.89	1462	120.383
XM_759138.1	561	239.192	19	29.3866
XM_759139.1	273	101.798	38	138.098
XM_759140.1	996	706.446	8	4.18941
XM_759141.1	648	427.137	1	0.866114
XM_759142.1	2253	1446.74	245	62.6495
XM_759143.1	510	254.646	127	184.505
XM_759144.1	1230	887.552	18	7.50276
XM_759145.1	1169	708.69	210	109.624
XM_759146.1	939	618.587	196	117.219
XM_759147.1	1248	828.966	178	79.4375
XM_759148.1	1182	879.371	88	37.0214
XM_759149.1	1662	1565.9	2774	655.366
XM_759150.1	1035	789.328	150	70.3034
XM_759151.1	2766	2442.92	547	82.8361
XM_759152.1	743	470.544	169.18	133.012
XM_759153.1	2192	1817.73	465.82	94.8051
XM_759154.1	1350	1077.61	434	148.995
XM_759155.1	357	198.721	107	199.196
XM_759156.1	6081	6199.69	4297	256.411
XM_759157.1	822	694.431	124	66.0594
XM_759158.1	529	296.658	1408	1755.85
XM_759159.1	823	505.701	341	249.461
XM_759160.1	755	541.696	263	179.615
XM_759161.1	1770	1510.42	438	107.28
XM_759162.1	1380	1245.64	1522	452.028
XM_759163.1	2517	2230.74	496	82.2572
XM_759164.1	1554	1379.22	533	142.966
XM_759165.1	739	533.726	96	66.5418
XM_759166.1	983	647.631	242	138.239
XM_759167.1	318	140.38	31	81.6959
XM_759168.1	681	456.471	111	89.9606
XM_759169.1	1113	832.319	41	18.2237
XM_759170.1	1956	1492.78	61	15.1173
XM_759171.1	648	392.933	49	46.1338
XM_759172.1	1103	699.361	132	69.8256
XM_759173.1	1185	873.048	170	72.0366
XM_759174.1	3582	2869.66	353	45.5079
XM_759175.1	582	343.087	101	108.908
XM_759176.1	654	313.922	64	75.4224
XM_759177.1	462	243.259	167	253.975
XM_759178.1	574	305.425	96	116.281
XM_759179.1	1539	1049.34	276	97.3054
XM_759180.1	331	152.046	114	277.378
XM_759181.1	2277	1921.07	291	56.0392
XM_759182.1	153	23.8898	63	975.595
XM_759183.1	975	836.965	460	203.326
XM_759184.1	1011	755.323	64	31.3465
XM_759185.1	1533	1366.47	243	65.7883
XM_759186.1	660	448.139	117	96.5862
XM_759187.1	2618	2337.8	1649	260.949
XM_759188.1	2742	2471.7	1761	263.576
XM_759189.1	2370	2143.99	586	101.115
XM_759190.1	4854	4707.11	815	64.0538
XM_759191.1	1761	1534.32	479	115.495
XM_759192.1	903	602.533	347	213.054
XM_759193.1	1518	1023.25	672	242.957
XM_759194.1	400	264.193	85	119.025
XM_759195.1	2202	1733.5	205	43.7495
XM_759196.1	1555	1135.54	134	43.6559
XM_759197.1	1776	1114.69	8	2.65507
XM_759198.1	1503	1209.25	359	109.83
XM_759199.1	1578	1258.65	26	7.64207
XM_759200.1	1515	1199.08	113	34.8637
XM_759201.1	2142	2009.46	401	73.8255
XM_759202.1	1289	998.268	524	194.19
XM_759203.1	1031	926.234	347	138.596
XM_759204.1	1542	1445.11	442	113.152
XM_759205.1	966	749.491	1117	551.352
XM_759206.1	1305	1119.95	320	105.705
XM_759207.1	2865	2508.06	353	52.0691
XM_759208.1	11787	11100.5	3123	104.081
XM_759209.1	1709	1476.83	244	61.1224
XM_759210.1	1401	1168.05	97	30.7221
XM_759211.1	1225	900.898	641	263.223
XM_759212.1	461	228.558	123	199.091
XM_759213.1	1233	1088.77	199	67.6173
XM_759214.1	732	480.251	191	147.132
XM_759215.1	1647	1175.98	787	247.582
XM_759216.1	195	45.2793	8	65.3631
XM_759217.1	216	58.9077	21	131.883
XM_759218.1	312	135.098	18662	51103.6
XM_759219.1	780	501.915	73	53.8065
XM_759220.1	312	135.098	18662	51103.6
XM_759221.1	1542	1578.15	217	50.8691
XM_759222.1	576	322.692	167	191.457
XM_759223.1	920	854.063	1116	483.411
XM_759224.1	1058	783.317	366	172.856
XM_759225.1	2136	1423.62	341	88.6139
XM_759226.1	1968	2162.5	3271	559.587
XM_759228.1	273	101.798	119	432.465
XM_759229.1	510	287.545	235	302.346
XM_759230.1	1176	956.758	250	96.6674
XM_759231.1	1530	1257.48	299	87.9651
XM_759232.1	1026	807.018	349	159.987
XM_759233.1	951	848.132	1473	642.512
XM_759234.1	1137	997.144	461	171.035
XM_759235.1	4137	4139.26	826	73.8243
XM_759236.1	666	419.659	61	53.7743
XM_759237.1	168	30.5324	82	993.563
XM_759238.1	2442	2169.56	681	116.123
XM_759239.1	1665	1439.82	525	134.894
XM_759240.1	1788	1547.01	146	34.9141
XM_759241.1	375	192.497	87	167.201
XM_759242.1	773	498.195	185	137.377
XM_759243.1	1329	1377.74	3646	979.017
XM_759244.1	672	411.839	14	12.576
XM_759245.1	468	282.681	100	130.872
XM_759246.1	4446	3590.24	803	82.7435
XM_759247.1	171	32.1114	13	149.771
XM_759248.1	750	489.86	35	26.4325
XM_759249.1	3738	3027.55	120	14.6633
XM_759250.1	2778	2057.44	12	2.15773
XM_759251.1	1050	710.968	10	5.20346
XM_759252.1	693	365.766	86	86.9835
XM_759253.1	594	350.318	147	155.238
XM_759254.1	474	298.542	493	610.918
XM_759255.1	438	267.244	53	73.3685
XM_759256.1	1377	1113.85	395	131.194
XM_759257.1	1992	2051.81	933.784	168.365
XM_759258.1	639	421.74	23.2158	20.3649
XM_759259.1	2835	2639.22	310	43.4539
XM_759260.1	489	297.488	216	268.612
XM_759261.1	1203	956.603	88	34.0325
XM_759262.1	1395	1426.29	1194	309.698
XM_759263.1	933	575.083	162	104.214
XM_759264.1	210	55.1196	43	288.606
XM_759265.1	270	99.3186	44	163.895
XM_759266.1	1005	691.142	92	49.245
XM_759267.1	432	227.334	132.331	215.347
XM_759268.1	1806	1605.57	467.669	107.759
XM_759269.1	1167	871.062	492	208.958
XM_759270.1	2417	1772.22	391	81.6207
XM_759271.1	858	599.45	159	98.1265
XM_759272.1	657	399.01	90	83.4451
XM_759273.1	249	82.6109	63	282.127
XM_759274.1	2811	2971.73	1054	131.212
XM_759275.1	1098	987.115	149	55.842
XM_759276.1	1044	923.488	148	59.2888
XM_759277.1	1317	1031.2	262	93.9942
XM_759278.1	3078	3291.52	753	84.6332
XM_759279.1	436	251.446	407	598.813
XM_759280.1	363	189.815	82	159.818
XM_759281.1	1983	1776.79	874	181.977
XM_759282.1	2856	2802.39	2420	319.469
XM_759283.1	3033	3315.37	1711	190.924
XM_759284.1	969	836.104	187	82.7415
XM_759285.1	1943	1615.28	414	94.819
XM_759287.1	827	591.302	74	46.2982
XM_759288.1	2412	1957.89	674	127.355
XM_759289.1	1200	906.9	99	40.3848
XM_759290.1	2007	1754.15	155	32.6895
XM_759291.1	861	896.164	1065	439.647
XM_759292.1	270	99.3186	154	573.631
XM_759293.1	678	557.511	325	215.661
XM_759294.1	2193	1854.6	723	144.221
XM_759295.1	489	316.094	675	790.005
XM_759296.1	1221	900.397	140	57.5223
XM_759297.1	1071	623.584	72	42.715
XM_759298.1	687	515.046	306	219.795
XM_759299.1	3921	3331.51	813	90.28
XM_759300.1	918	523.382	76	53.7201
XM_759301.1	1311	938.751	182	71.7238
XM_759302.1	1203	1009.14	294	107.78
XM_759303.1	1488	1181.86	271	84.8289
XM_759304.1	186	40.0635	33	304.724
XM_759305.1	1905	1689.72	803	175.81
XM_759306.1	405	238.398	81	125.697
XM_759307.1	937	690.282	266	142.56
XM_759308.1	459	219.972	98	164.817
XM_759309.1	1956	2110.89	3647	639.165
XM_759310.1	1655	1508.82	479	117.447
XM_759311.1	240	75.8143	281	1371.19
XM_759312.1	630	475.778	537	417.554
XM_759313.1	882	696.946	95	50.4274
XM_759314.1	475	295.486	866	1084.24
XM_759315.1	933	779.499	617	292.827
XM_759316.1	1721	1187.94	99	30.8306
XM_759317.1	1632	1293.83	422	120.664
XM_759318.1	2063	1923.68	395	75.9638
XM_759319.1	921	639.785	112	64.7628
XM_759320.1	1406	1029.24	462	166.06
XM_759321.1	1424	1404.21	636	167.559
XM_759322.1	801	490.826	159	119.843
XM_759323.1	1326	910.515	72	29.2542
XM_759324.1	1014	793.505	68	31.7031
XM_759325.1	495	309.149	0	0
XM_759326.1	894	693.232	242	129.145
XM_759327.1	4638	3961.18	605	56.5032
XM_759328.1	2889	2602.48	425	60.4148
XM_759329.1	1146	962.535	96	36.8975
XM_759330.1	2289	2268.74	1584	258.293
XM_759331.1	1396	1167.9	183	57.9678
XM_759332.1	775	586.733	117	73.7713
XM_759333.1	1810	1634.65	2904	657.227
XM_759334.1	1569	1420.49	931	242.468
XM_759335.1	534	287.536	98	126.089
XM_759336.1	636	474.751	237	184.682
XM_759337.1	720	501.506	220	162.289
XM_759338.1	1167	944.099	152	59.5618
XM_759339.1	882	752.681	539	264.923
XM_759340.1	3213	2974.1	81	10.0756
XM_759341.1	708	407.518	114	103.49
XM_759342.1	837	621.17	115	68.4904
XM_759343.1	642	481.218	206	158.368
XM_759344.1	2703	2415.43	337	51.6151
XM_759345.1	1053	739.153	202	101.102
XM_759346.1	597	351.588	181	190.453
XM_759347.1	1451	1133.06	732	239.001
XM_759348.1	10767	9824.47	4406	165.912
XM_759349.1	528	370.084	299	298.891
XM_759350.1	978	755.392	246	120.477
XM_759351.1	2142	1579.68	529	123.888
XM_759352.1	1536	1120.32	349	115.246
XM_759353.1	1569	1289.69	315	90.358
XM_759354.1	1068	727.87	169	85.8964
XM_759355.1	2988	2838.54	1053	137.238
XM_759356.1	603	407.964	199	180.457
XM_759357.1	4293	4029.18	882	80.9831
XM_759358.1	2541	2195.61	623	104.972
XM_759359.1	405	249.917	42	62.1722
XM_759360.1	743	526.739	123	86.3877
XM_759361.1	525	343.584	290	312.253
XM_759362.1	1448	1430.31	320	82.768
XM_759363.1	1939	1864.56	953	189.086
XM_759364.1	2379	2365.88	811	126.815
XM_759365.1	1590	1605.97	369	85.0023
XM_759366.1	2229	2460.25	720	108.267
XM_759367.1	1262	1110.41	718	239.213
XM_759368.1	966	713.761	454	235.313
XM_759369.1	3177	3069.48	407	49.0536
XM_759370.1	604	454.325	128	104.228
XM_759371.1	765	647.568	548	313.067
XM_759372.1	929	806.886	453	207.696
XM_759373.1	977	831.491	405	180.194
XM_759374.1	543	250.832	53	78.1689
XM_759375.1	2826	2598.01	992	141.258
XM_759376.1	540	422.681	319	279.203
XM_759377.1	444	237.945	198	307.844
XM_759378.1	1354	825.137	61	27.3493
XM_759379.1	2187	2027.28	1294	236.136
XM_759380.1	471	287.693	223	286.759
XM_759381.1	1599	1244.93	862	256.157
XM_759382.1	1032	703.546	141	74.1428
XM_759383.1	477	291.508	1	1.26909
XM_759384.1	348	167.67	0	0
XM_759385.1	243	78.0396	0	0
XM_759386.1	483	220.567	2	3.35453
XM_759387.1	1803	1386.98	189	50.4119
XM_759388.1	609	432.813	875	747.911
XM_759389.1	1755	1264.45	767	224.406
XM_759390.1	873	694.424	115	61.2654
XM_759391.1	1445	1151.93	249	79.9675
XM_759392.1	1448	1064.17	272	94.5588
XM_759393.1	831	681.914	238	129.119
XM_759394.1	957	724.514	314	160.334
XM_759395.1	888	561.914	166	109.29
XM_759396.1	1248	978.622	226	85.435
XM_759397.1	603	369.596	78	78.0745
XM_759398.1	1290	1106.95	181	60.4915
XM_759399.1	1911	1685.14	441	96.8157
XM_759400.1	753	452.946	153	124.965
XM_759401.1	324	145.754	63	159.905
XM_759402.1	783	498.322	95	70.5271
XM_759403.1	594	248.699	37	55.0389
XM_759404.1	1119	861.927	256	109.878
XM_759405.1	636	455.247	175	142.211
XM_759406.1	674	535.834	1131	780.862
XM_759407.1	714	401.916	193	177.65
XM_759408.1	522	261.828	131	185.096
XM_759409.1	888	749.674	272	134.227
XM_759410.1	3408	3053.67	1234	149.498
XM_759411.1	519	334.209	132	146.116
XM_759412.1	4407	4150.77	1395	124.333
XM_759413.1	1052	722.802	149	76.2621
XM_759414.1	1911	1460.59	483	122.338
XM_759415.1	1885	1714.69	681	146.927
XM_759416.1	1746	1666.79	94	20.8636
XM_759417.1	1338	949.365	231	90.0163
XM_759418.1	375	193.031	152	291.312
XM_759419.1	4878	4443.01	1634	136.056
XM_759420.1	468	284.318	171	222.502
XM_759421.1	783	559.42	292	193.102
XM_759422.1	1701	1314.69	656	184.596
XM_759423.1	1365	1212.91	129	39.3462
XM_759424.1	2175	1922.51	805	154.906
XM_759425.1	1872	1510.8	208	50.9328
XM_759426.1	888	644.707	147	84.3523
XM_759427.1	3862	3498.49	3256	344.307
XM_759428.1	3987	3142.53	646	76.0493
XM_759429.1	1176	1000.78	436	161.172
XM_759430.1	2826	2483.78	310	46.1733
XM_759431.1	651	366.143	2	2.02079
XM_759432.1	1068	747.338	252	124.746
XM_759433.1	1128	854.251	366	158.503
XM_759434.1	840	595.39	177	109.98
XM_759435.1	600	422.416	141	123.487
XM_759436.1	649	400.092	241	222.843
XM_759437.1	1477	1234.78	744	222.908
XM_759438.1	1413	1201.93	623	191.757
XM_759439.1	1063	823.39	563	252.956
XM_759440.1	1470	1171.18	17	5.36994
XM_759441.1	2334	1855.34	275	54.8342
XM_759442.1	2376	1813.5	134	27.3357
XM_759443.1	1191	901.327	119	48.8435
XM_759444.1	810	567.449	13	8.47537
XM_759445.1	4215	3030.4	611	74.5905
XM_759446.1	2274	1804.21	30	6.15144
XM_759447.1	513	274.751	102	137.342
XM_759448.1	453	235.718	186	291.919
XM_759449.1	2031	1478.03	97	24.279
XM_759450.1	3414	3414.3	481	52.1177
XM_759451.1	4767	3295.61	740	83.0689
XM_759452.1	1738	1579.65	757	177.287
XM_759453.1	608	389.107	1333	1267.37
XM_759454.1	831	489.283	43	32.5125
XM_759455.1	618	393.025	213	200.494
XM_759456.1	1258	813.95	82	37.2699
XM_759457.1	1489	1254.34	1294	381.645
XM_759458.1	5151	4063.51	145	13.2011
XM_759459.1	1370	863.026	33	14.1459
XM_759460.1	1725	1477.37	304	76.1246
XM_759461.1	1587	1184.13	211	65.9213
XM_759462.1	1299	970.651	250	95.2838
XM_759463.1	1614	1198.12	287	88.6181
XM_759464.1	1452	1231.11	190	57.095
XM_759465.1	1644	1311.94	89	25.0967
XM_759466.1	864	526.621	34	23.8849
XM_759467.1	873	526.474	66	46.3776
XM_759468.1	165	29.1622	11	139.545
XM_759469.1	9903	9689.06	174.711	6.67083
XM_759470.1	1590	1327.7	20.6848	5.76362
XM_759471.1	1419	1154.03	399.615	128.105
XM_759472.1	1686	1263.22	161.353	47.2541
XM_759473.1	1347	900.318	67.1547	27.5945
XM_759474.1	1536	1087.08	140.295	47.7442
XM_759475.1	1569	1107.44	224.303	74.9301
XM_759476.1	1410	979.186	21.3087	8.05072
XM_759477.1	1497	1205.22	19	5.83214
XM_759478.1	2124	1761.06	18	3.78128
XM_759479.1	765	432.949	117.459	100.367
XM_759480.1	1740	1414.96	49.3892	12.9131
XM_759481.1	1713	1385.03	39.5632	10.5676
XM_759482.1	1788	1448.53	64.6108	16.5014
XM_759483.1	1548	1242	140.722	41.9161
XM_759484.1	522	251.713	14	20.5762
XM_759485.1	1011	763.765	27	13.0781
XM_759486.1	1353	1028.42	199	71.5856
XM_759487.1	1473	1019.69	36	13.061
XM_759488.1	2376	1471.2	28	7.04092
XM_759489.1	1338	819.608	29	13.0898
XM_759490.1	1494	891.541	78	32.3665
XM_759491.1	1326	858.023	108	46.5658
XM_759492.1	4596	3991.26	253.983	23.5417
XM_759493.1	4599	3648.57	67.9165	6.88643
XM_759494.1	1659	1325.49	77	21.491
XM_759495.1	5373	4419.5	92	7.70117
XM_759496.1	2304	1683.01	522	114.743
XM_759497.1	831	637.426	200	116.076
XM_759498.1	1050	794.507	817	380.423
XM_759499.1	1965	1474.47	302	75.7726
XM_759500.1	1713	1443.43	287	73.5576
XM_759501.1	3372	3078.25	600	72.1091
XM_759502.1	501	223.695	85	140.574
XM_759503.1	654	417.582	98	86.8214
XM_759504.1	876	561.322	144	94.9058
XM_759505.1	3945	3299.52	471	52.8095
XM_759506.1	1098	636.696	5	2.90523
XM_759507.1	864	677.496	0	0
XM_759508.1	1938	1316.1	4	1.12438
XM_759509.1	2328	2055.54	438	78.83
XM_759510.1	1170	971.662	498	189.608
XM_759511.1	687	430.958	94	80.6929
XM_759512.1	650	417.118	476	422.173
XM_759513.1	1737	1207.82	32.0248	9.80899
XM_759514.1	2053	1510.65	1340	328.159
XM_759515.1	1948	1953.21	1139	215.733
XM_759516.1	1386	1072.83	159	54.829
XM_759517.1	1053	837.08	580	256.332
XM_759518.1	1041	969.576	293	111.796
XM_759519.1	1752	1219.62	89.9752	27.2922
XM_759520.1	1089	1004.01	144	53.06
XM_759521.1	1072	866.818	442	188.641
XM_759522.1	1239	1276.93	126	36.5043
XM_759523.1	831	571.569	101	65.3725
XM_759524.1	673	479.872	412	317.625
XM_759525.1	1791	1443.44	478	122.51
XM_759526.1	420	226.93	176	286.921
XM_759527.1	2874	2690.29	172	23.6522
XM_759528.1	1755	1526.85	124	30.0447
XM_759529.1	1845	1214.38	10	3.04641
XM_759530.1	1458	1087.77	128	43.5325
XM_759531.1	2751	1887.94	276	54.0832
XM_759532.1	1143	1159.5	172	54.8781
XM_759533.1	1529	1261.48	471	138.128
XM_759534.1	1113	1146.17	170	54.8708
XM_759535.1	2634	2190.75	641	108.245
XM_759536.1	1869	1819.56	136	27.6512
XM_759537.1	1042	968.491	640	244.47
XM_759538.1	2580	2593.64	677	96.5654
XM_759539.1	1539	1235.23	385	115.307
XM_759540.1	672	467.599	762	602.87
XM_759541.1	819	644.282	17	9.76146
XM_759542.1	786	591.967	388	242.48
XM_759543.1	747	585.053	504	318.697
XM_759544.1	1035	849.485	178	77.5187
XM_759545.1	285	111.695	188	622.683
XM_759546.1	3270	3045.44	1164	141.398
XM_759547.1	882	542.228	80	54.5821
XM_759548.1	1950	1384.4	366	97.8054
XM_759549.1	1206	1002.07	208	76.7901
XM_759550.1	1453	1078.93	246	84.3495
XM_759551.1	3042	2658.34	567	78.9067
XM_759552.1	1042	774.101	94	44.9234
XM_759553.1	1446	1214.11	181	55.152
XM_759554.1	628	375.835	613	603.4
XM_759555.1	1016	722.443	139	71.1793
XM_759556.1	328	149.295	192	475.77
XM_759557.1	792	607.452	251	152.864
XM_759558.1	1145	1068.15	2592	897.732
XM_759559.1	915	742.75	2461	1225.78
XM_759560.1	843	604.144	91	55.7241
XM_759561.1	264	94.516	41	160.48
XM_759562.1	1500	1130.2	152	49.7545
XM_759563.1	2133	1969.2	1888	354.695
XM_759564.1	1428	1073.81	283	97.4991
XM_759565.1	708	522.486	1087	769.657
XM_759566.1	794	535.155	707	488.744
XM_759567.1	438	195.381	147	278.341
XM_759568.1	309	132.449	80	223.452
XM_759569.1	816	622.382	867	515.353
XM_759570.1	465	229.704	67	107.907
XM_759571.1	1377	1243.01	490	145.836
XM_759572.1	1377	1120.87	430	141.924
XM_759573.1	1839	1337.33	41	11.342
XM_759574.1	1716	1378.42	15.3554	4.12117
XM_759575.1	1353	1009.38	49.6446	18.1953
XM_759576.1	362	180.852	9	18.4103
XM_759577.1	1196	797.019	279	129.502
XM_759578.1	249	82.6109	67	300.04
XM_759579.1	345	164.857	29	65.0778
XM_759580.1	780	458.593	116	93.5779
XM_759581.1	675	358.723	114	117.568
[truncated: 2,062 more rows]

## Sheet: Schizont 3_abundance.tsv
target_id	length	eff_length	est_counts	tpm
XM_757577.1	618	194.641	10	13.9151
XM_757578.1	534	166.764	36	58.4686
XM_757579.1	741	344.677	1074	843.945
XM_757580.1	237	96.4284	1	2.80878
XM_757581.1	699	226.108	173	207.23
XM_757582.1	426	271.904	575	572.762
XM_757583.1	204	71.081	4	15.2415
XM_757584.1	363	210.515	563	724.349
XM_757585.1	624	212.788	7	8.90989
XM_757586.1	465	310.579	1	0.872067
XM_757587.1	336	184.571	120	176.092
XM_757588.1	579	210.881	119	152.838
XM_757589.1	624	258.472	756	792.19
XM_757590.1	306	156.318	2	3.46531
XM_757591.1	117	22.933	77	909.393
XM_757592.1	423	268.958	2	2.01403
XM_757593.1	375	222.016	1313	1601.78
XM_757594.1	672	199.297	15	20.385
XM_757595.1	1236	721.355	5681	2133.03
XM_757596.1	402	164.762	1285	2112.36
XM_757597.1	642	185.028	13	19.0295
XM_757598.1	585	215.879	531	666.204
XM_757599.1	1509	710.492	1312	500.146
XM_757600.1	1590	782.38	1747	604.779
XM_757601.1	225	87.0412	22	68.4572
XM_757602.1	294	145.321	0	0
XM_757603.1	183	56.631	0	0
XM_757604.1	3018	1555.84	2755	479.6
XM_757605.1	1605	843.2	1806	580.108
XM_757606.1	492	337.453	12	9.63139
XM_757607.1	231	91.8422	8	23.5923
XM_757608.1	525	199.401	905.987	1230.6
XM_757609.1	162	44.2806	3	18.3497
XM_757610.1	237	96.4284	399.457	1121.98
XM_757611.1	525	195.66	1491.15	2064.15
XM_757612.1	162	44.2806	2	12.2332
XM_757613.1	237	96.4284	701.615	1970.68
XM_757614.1	492	174.157	186	289.263
XM_757615.1	381	227.858	1258	1495.33
XM_757616.1	237	96.4284	374.929	1053.09
XM_757617.1	525	187.961	240.859	347.07
XM_757618.1	1092	492.357	819	450.532
XM_757619.1	948	399.524	149	101.01
XM_757620.1	693	273.861	315	311.532
XM_757621.1	1407	1312.07	20.6036	4.25311
XM_757622.1	2025	2031.65	4.46761	0.595591
XM_757623.1	2019	2007.65	33.3767	4.50274
XM_757624.1	2214	2280.87	0.836731	0.0993591
XM_757625.1	2049	1894.27	0	0
XM_757626.1	1440	1438.44	2.60136	0.489813
XM_757627.1	580	425.377	0	0
XM_757628.1	1467	1449.47	0	0
XM_757629.1	2010	1991.07	7.75531	1.05495
XM_757630.1	1476	1467.89	17.011	3.13874
XM_757631.1	1407	1312.07	20.6036	4.25311
XM_757632.1	1476	1472.66	6.9429	1.27691
XM_757633.1	1647	1492.27	0	0
XM_757634.1	2007	2038.29	7.32934	0.973915
XM_757635.1	1638	1483.27	0	0
XM_757636.1	1440	1438.44	2.60136	0.489813
XM_757637.1	2049	1894.27	0	0
XM_757638.1	2214	2281.76	239.943	28.4813
XM_757639.1	1473	1468.84	173.877	32.0619
XM_757640.1	1818	1826.07	30.1801	4.47637
XM_757641.1	2010	2036.55	7.64312	1.01648
XM_757642.1	2001	2014.98	6.44923e-07	8.66878e-08
XM_757643.1	1470	1412.09	7.52692	1.4437
XM_757644.1	1218	1139.22	2.82202	0.670924
XM_757645.1	1249	1222.75	5.98018	1.32465
XM_757646.1	1452	1457.48	6.46781	1.20192
XM_757647.1	1452	1437.45	5.14195	0.968848
XM_757648.1	2388	2423.76	163.289	18.2469
XM_757649.1	237	96.4284	65	182.57
XM_757650.1	833	590.146	285	130.8
XM_757651.1	1359	1102.62	775	190.369
XM_757652.1	1807	1073.26	828	208.953
XM_757653.1	222	84.7543	84	268.435
XM_757654.1	1405	1077.59	114	28.6533
XM_757655.1	984	812.924	652	217.23
XM_757656.1	447	233.979	93	107.653
XM_757657.1	1944	1661.36	494	80.535
XM_757658.1	1122	830.773	948	309.063
XM_757659.1	1092	874.842	736	227.861
XM_757660.1	2415	1955.71	1528	211.612
XM_757661.1	405	168.503	321	515.964
XM_757662.1	999	608.105	705	314.002
XM_757663.1	417	227.982	19	22.5722
XM_757664.1	951	603.572	27	12.1159
XM_757665.1	684	424.392	40	25.5279
XM_757666.1	867	516.968	1	0.523911
XM_757667.1	816	510.396	137	72.7001
XM_757668.1	399	162.435	1	1.66741
XM_757669.1	729	454.725	55	32.7594
XM_757670.1	1192	920.913	2278	669.972
XM_757671.1	1544	1284.23	969	204.363
XM_757672.1	900	592.534	79	36.1107
XM_757673.1	747	542.042	539	269.326
XM_757674.1	447	281.082	287	276.548
XM_757675.1	2223	2065.04	2663	349.273
XM_757676.1	1032	944.614	937	268.662
XM_757677.1	1404	1113.85	1487	361.581
XM_757678.1	2013	1457.61	250	46.4537
XM_757679.1	297	148.079	156	285.333
XM_757680.1	3687	3363.45	566	45.5778
XM_757681.1	231	91.8422	272	802.137
XM_757682.1	6162	5943.38	6381	290.788
XM_757683.1	1227	914.119	302	89.4801
XM_757684.1	490	353.136	474	363.545
XM_757685.1	3477	3536.88	3983	305.008
XM_757686.1	805	728.807	3893	1446.75
XM_757687.1	984	978.909	477	131.977
XM_757688.1	3246	3375.52	2347	188.319
XM_757689.1	498	407.715	545	362.044
XM_757690.1	1551	1602.45	372	62.8752
XM_757691.1	2154	1835.88	1	0.147529
XM_757692.1	411	213.257	236	299.73
XM_757693.1	1470	1264.99	1065	228.026
XM_757694.1	4716	5033.54	1723	92.7115
XM_757695.1	1173	940.261	50	14.4027
XM_757696.1	582	432.817	412	257.819
XM_757697.1	579	453.752	334	199.365
XM_757698.1	7080	7135.27	3315	125.833
XM_757699.1	5664	5149.14	3584	188.519
XM_757700.1	5766	5484.84	2953	145.821
XM_757701.1	198	67.0067	66	266.776
XM_757702.1	339	187.345	22	31.8054
XM_757703.1	1829	1669.97	1507	244.414
XM_757704.1	747	430.712	329	206.886
XM_757705.1	1116	930.614	131	38.1262
XM_757706.1	3898	3460.9	1267	99.1539
XM_757707.1	1338	1035.38	7	1.83113
XM_757708.1	1800	1725.44	1065	167.175
XM_757709.1	633	491.835	58	31.9397
XM_757710.1	624	521.825	552	286.508
XM_757711.1	546	375.29	35	25.2594
XM_757712.1	1122	820.623	68	22.4433
XM_757713.1	1569	1134.87	484	115.51
XM_757714.1	679	436.278	1031	640.055
XM_757715.1	408	250.797	86	92.8749
XM_757716.1	294	145.321	102	190.106
XM_757717.1	222	84.7543	123	393.066
XM_757718.1	846	512.218	258	136.423
XM_757719.1	1434	993.273	422	115.071
XM_757720.1	927	773.802	116	40.6023
XM_757721.1	1223	820.739	561	185.131
XM_757722.1	2254	1922.54	3647	513.785
XM_757723.1	1596	1476.8	652	119.577
XM_757724.1	1972	1728.53	888	139.142
XM_757725.1	937	758.275	411	146.804
XM_757726.1	384	217.286	125	155.812
XM_757727.1	5172	4106.1	1349	88.9824
XM_757728.1	1009	792.864	2596	886.804
XM_757729.1	1458	1273.44	872	185.464
XM_757730.1	240	98.9028	28	76.6781
XM_757731.1	853	539.743	158	79.2852
XM_757732.1	1779	1215.77	3	0.668331
XM_757733.1	1984	1489.89	322	58.536
XM_757734.1	1644	1503.03	770	138.754
XM_757735.1	699	486.035	220	122.596
XM_757736.1	1659	1357.47	629	125.5
XM_757737.1	240	98.9028	43	117.756
XM_757738.1	177	52.8775	26	133.176
XM_757739.1	219	82.3777	42	138.09
XM_757740.1	1413	1085.86	203	50.6341
XM_757741.1	556	400.483	636	430.125
XM_757742.1	1611	1378.03	1514	297.57
XM_757743.1	273	126.532	124	265.425
XM_757744.1	830	627.203	324	139.913
XM_757745.1	1791	1607.33	827	139.355
XM_757746.1	1359	1273.15	902	191.888
XM_757747.1	589	479.851	1252	706.674
XM_757748.1	744	567.139	1842	879.674
XM_757749.1	1234	1041.22	1116	290.298
XM_757750.1	1182	825.476	132	43.3103
XM_757751.1	1728	1313.54	81.9866	16.9052
XM_757752.1	3546	2852.94	107	10.1581
XM_757753.1	1608	1145.2	209	49.4295
XM_757754.1	1995	1899.01	1920	273.839
XM_757755.1	276	129.319	56	117.286
XM_757756.1	919	819.415	169	55.8605
XM_757757.1	399	231.762	105	122.707
XM_757758.1	420	338.972	31	24.7696
XM_757759.1	1761	1403.94	879	169.575
XM_757760.1	1140	907.171	518	154.655
XM_757761.1	1848	1742.75	2690	418.06
XM_757762.1	801	772.993	291	101.962
XM_757763.1	315	164.745	162	266.333
XM_757764.1	390	174.44	70	108.686
XM_757765.1	999	742.384	294	107.261
XM_757766.1	417	260.209	215	223.789
XM_757767.1	374	168.561	185	297.26
XM_757768.1	2907	2261.25	803	96.1808
XM_757769.1	2001	1620.1	85	14.2102
XM_757770.1	249	106.112	21	53.6013
XM_757771.1	2131	1523.87	1323	235.143
XM_757772.1	1734	1303.26	324	67.3344
XM_757773.1	822	602.335	108	48.5632
XM_757774.1	1054	685.856	681	268.928
XM_757775.1	878	665.096	1848	752.557
XM_757776.1	563	410.52	1250	824.704
XM_757777.1	3735	3479.53	1224	95.2758
XM_757778.1	6929	6158.35	3695	162.507
XM_757779.1	2181	1614.78	118.954	19.9522
XM_757780.1	3075	2535.15	142.489	15.223
XM_757781.1	975	798.459	554	187.922
XM_757782.1	5022	4394.4	2966	182.807
XM_757783.1	162	44.2806	112	685.057
XM_757784.1	1544	1264.77	662	141.765
XM_757785.1	2460	1915.73	4067	574.993
XM_757786.1	715	586.964	2599	1199.27
XM_757787.1	573	324.608	361	301.21
XM_757788.1	609	386.214	54	37.8694
XM_757789.1	1359	1209.65	540	120.908
XM_757790.1	588	337.998	92	73.7217
XM_757791.1	1629	1145.92	306	72.325
XM_757792.1	558	427.501	351	222.378
XM_757793.1	1335	1165.68	1054	244.897
XM_757794.1	7470	6439.8	5703	239.857
XM_757795.1	666	434.766	330	205.58
XM_757796.1	1136	905.07	630	188.53
XM_757797.1	588	441.52	323	198.141
XM_757798.1	585	324.237	17	14.2007
XM_757799.1	1064	654.781	312	129.057
XM_757800.1	324	173.129	209	326.963
XM_757801.1	1374	1014.36	330	88.1141
XM_757802.1	1257	844.407	346	110.98
XM_757803.1	471	238.57	185	210.028
XM_757804.1	1410	1087.54	441	109.829
XM_757805.1	451	271.244	214	213.686
XM_757806.1	684	486.874	780	433.911
XM_757807.1	1093	817.728	361	119.569
XM_757808.1	504	282.564	17	16.295
XM_757809.1	654	485.525	59	32.9126
XM_757810.1	903	574.618	25	11.7837
XM_757811.1	585	383.683	337	237.891
XM_757812.1	699	521.428	258	134.013
XM_757813.1	1476	1141.44	522	123.863
XM_757814.1	357	189.957	196	279.461
XM_757815.1	843	577.58	244	114.419
XM_757816.1	5391	4345.75	131.57	8.20001
XM_757817.1	3468	3077.05	1091	96.0312
XM_757818.1	1859	1660.4	2620	427.376
XM_757819.1	2703	2337.47	594	68.8276
XM_757820.1	1800	1504.46	504	90.7341
XM_757821.1	5280	4177.47	834	54.0723
XM_757822.1	696	429.571	495	312.099
XM_757823.1	580	353.234	387	296.736
XM_757824.1	462	298.51	57	51.7175
XM_757825.1	2409	2021.25	476	63.7835
XM_757826.1	525	380.344	54	38.4538
XM_757827.1	963	879.508	414	127.492
XM_757828.1	1590	1368.9	794	157.098
XM_757829.1	1086	724.772	622	232.44
XM_757830.1	1071	749.141	131	47.362
XM_757831.1	201	68.8541	39	153.411
XM_757832.1	1062	683.154	4	1.58585
XM_757833.1	1182	932.984	323	93.7671
XM_757834.1	948	841.752	145	46.6558
XM_757835.1	594	457.575	213	126.078
XM_757836.1	945	707.928	80	30.6072
XM_757837.1	231	91.8422	13	38.3374
XM_757838.1	267	121.349	142	316.937
XM_757839.1	1390	1097.9	472	116.44
XM_757840.1	723	584.486	543	251.621
XM_757841.1	1047	856.175	34	10.7557
XM_757842.1	2016	1465.03	697	128.857
XM_757843.1	195	64.8616	142	592.956
XM_757844.1	1008	656.091	127	52.4278
XM_757845.1	306	156.318	49	84.9001
XM_757846.1	450	265.028	71	72.5586
XM_757847.1	2418	2343.22	699	80.7954
XM_757848.1	1459	1324.1	1484	303.552
XM_757849.1	448	240.577	473	532.511
XM_757850.1	339	225.744	548	657.484
XM_757851.1	768	603.92	1090	488.842
XM_757852.1	780	709.382	782	298.572
XM_757853.1	2241	2134.06	376	47.7204
XM_757854.1	1697	1326.55	860	175.589
XM_757855.1	1371	1202.35	893	201.16
XM_757856.1	1341	1246.5	704	152.969
XM_757857.1	2492	2318.55	681	79.5521
XM_757858.1	2658	2554.97	587	62.2264
XM_757859.1	3036	3395.75	2010	160.318
XM_757860.1	1269	1179.37	28	6.43027
XM_757861.1	2262	2472.06	3014	330.222
XM_757862.1	673	438.654	267	164.859
XM_757863.1	522	446.604	393	238.337
XM_757864.1	426	260.713	104	108.042
XM_757865.1	2721	2593.69	1607	167.811
XM_757866.1	1053	911.098	6	1.78364
XM_757867.1	770	703.945	718	276.253
XM_757868.1	234	94.2299	226	649.593
XM_757869.1	2724	2406.08	189	21.2752
XM_757870.1	783	592.989	76	34.7128
XM_757871.1	1722	1484.13	691	126.104
XM_757872.1	1391	1114.57	491	119.315
XM_757873.1	1254	1182.73	572	130.988
XM_757874.1	357	193.668	145	202.783
XM_757875.1	270	123.925	371	810.843
XM_757876.1	1389	1144.06	1279	302.792
XM_757877.1	1251	1144.99	218	51.5676
XM_757878.1	1731	1607.77	391	65.8679
XM_757879.1	1068	820.677	264	87.1272
XM_757880.1	1771	1437.7	1947	366.791
XM_757881.1	1194	844.043	86	27.5966
XM_757882.1	660	316.346	196	167.809
XM_757883.1	1431	1353.3	1750	350.241
XM_757884.1	737	449.588	386	232.538
XM_757885.1	582	423.302	341	218.186
XM_757886.1	633	349.749	261	202.119
XM_757887.1	1584	1080.35	5	1.25351
XM_757888.1	1062	793.434	351	119.817
XM_757889.1	640	459.061	459	270.81
XM_757890.1	840	617.687	406	178.024
XM_757891.1	576	342.848	23	18.1697
XM_757892.1	866	668.656	2152	871.688
XM_757893.1	4359	3848.99	3446	242.488
XM_757894.1	4341	3710.66	631	46.0575
XM_757895.1	5895	4782.94	204	11.552
XM_757896.1	4128	3578.64	244.365	18.4945
XM_757897.1	2343	1674.82	30	4.8515
XM_757898.1	1209	741.956	122	44.5352
XM_757899.1	1560	1131	357	85.4924
XM_757900.1	1564	1257.64	357	76.8834
XM_757901.1	1173	862.58	11	3.45394
XM_757902.1	1692	1395.13	160.596	31.1776
XM_757903.1	1989	1614.59	74.9276	12.569
XM_757904.1	1296	940.015	74.9828	21.6047
XM_757905.1	1533	1168.81	0.00943946	0.00218739
XM_757906.1	1920	1536.73	75	13.2186
XM_757907.1	1530	1223.06	99.2814	21.9857
XM_757908.1	447	224.783	10	12.0492
XM_757909.1	1026	747.137	60	21.7507
XM_757910.1	1530	1167.16	57.9906	13.457
XM_757911.1	1920	1536.73	75	13.2186
XM_757912.1	1830	1437.7	576.719	108.647
XM_757913.1	1707	1314.52	281.698	58.0414
XM_757914.1	1824	1419.03	230	43.8993
XM_757915.1	1614	1180.52	27	6.19456
XM_757916.1	1989	1614.59	74.9276	12.569
XM_757917.1	1446	1044.39	150.017	38.9045
XM_757918.1	1395	1015.84	494	131.711
XM_757919.1	1398	1032.81	565	148.167
XM_757920.1	1095	819.418	363	119.984
XM_757921.1	1275	906.937	182	54.3521
XM_757922.1	1344	1067.37	116	29.4351
XM_757923.1	462	211.333	103	132.006
XM_757924.1	1854	1437.1	83	15.6428
XM_757925.1	1305	1163.6	78.243	18.2123
XM_757926.1	1590	1327.71	66.6761	13.6015
XM_757927.1	1476	1190.56	574.536	130.703
XM_757928.1	1476	1195.01	436	98.818
XM_757929.1	1098	707.617	190	72.7239
XM_757930.1	1707	1257.82	166.093	35.7646
XM_757931.1	1503	1152.71	218	51.2223
XM_757932.1	552	258.168	17	17.8348
XM_757933.1	4590	3680.11	384.693	28.3123
XM_757934.1	2736	2372.19	81	9.24819
XM_757935.1	711	542.28	170	84.9077
XM_757936.1	852	503.903	662	355.822
XM_757937.1	1679	1625.89	731	121.772
XM_757938.1	429	224.698	145	174.78
XM_757939.1	2222	1909.34	1938	274.911
XM_757940.1	1104	1015.5	938	250.175
XM_757941.1	1353	1253.89	436	94.1782
XM_757942.1	177	52.8775	84	430.259
XM_757943.1	1065	906.929	684	204.27
XM_757944.1	297	175.54	185	285.441
XM_757945.1	1287	1104.02	435	106.717
XM_757946.1	1068	839.314	377	121.657
XM_757947.1	2184	1953.15	7	0.970698
XM_757948.1	1440	1260.88	21	4.51094
XM_757949.1	1215	1171.85	523	120.879
XM_757950.1	270	123.925	80	174.845
XM_757951.1	869	695.161	602	234.549
XM_757952.1	765	704.812	58	22.2883
XM_757953.1	402	240.007	319	359.988
XM_757954.1	1635	1518.33	812	144.847
XM_757955.1	612	403.233	279	187.4
XM_757956.1	1227	1141.08	279	66.2231
XM_757957.1	774	699.391	52	20.1375
XM_757958.1	998	800.726	195	65.9588
XM_757959.1	1524	1211.49	685	153.141
XM_757960.1	606	433.491	245	153.076
XM_757961.1	564	448.494	251	151.579
XM_757962.1	867	784.898	307	105.937
XM_757963.1	432	275.099	535	526.729
XM_757964.1	1131	1033.54	1314	344.341
XM_757965.1	606	439.022	48	29.6126
XM_757966.1	1314	1356.15	3	0.599148
XM_757967.1	1323	1205.98	1514	340.022
XM_757968.1	363	165.501	152	248.75
XM_757969.1	273	126.532	127	271.847
XM_757970.1	390	260.997	548	568.678
XM_757971.1	1434	1546.87	631	110.483
XM_757972.1	951	840.786	1148	369.809
XM_757973.1	1581	1427.25	1448	274.783
XM_757974.1	5043	5149.2	2830	148.857
XM_757975.1	1336	1131.84	644	154.108
XM_757976.1	480	311.808	661	574.164
XM_757977.1	555	421.635	338	217.121
XM_757978.1	649	439.472	2050	1263.41
XM_757979.1	540	300.817	144	129.653
XM_757980.1	1506	1041.59	333	86.5907
XM_757981.1	1796	1497.79	1124	203.253
XM_757982.1	1542	1262.91	60	12.8677
XM_757983.1	1257	1011.95	10	2.67648
XM_757984.1	660	502.407	764	411.869
XM_757985.1	3745	3612.2	8689	651.509
XM_757986.1	414	235.995	15	17.2152
XM_757987.1	1806	1525.75	538	95.5037
XM_757988.1	888	619.681	263	114.95
XM_757989.1	1422	1297.18	220.25	45.9871
XM_757990.1	1428	1272.27	1664.75	354.398
XM_757991.1	2011	1665.62	689	112.038
XM_757992.1	2010	1426.35	750	142.416
XM_757993.1	321	176.207	937	1440.25
XM_757994.1	234	94.2299	196	563.364
XM_757995.1	627	546.451	351	173.971
XM_757996.1	849	733.844	85	31.3716
XM_757997.1	1600	1400.44	440	85.0962
XM_757998.1	774	654.914	379	156.739
XM_757999.1	432	277.525	1	0.975934
XM_758000.1	783	624.371	221	95.8675
XM_758001.1	510	312.656	233	201.842
XM_758002.1	525	305.998	189	167.288
XM_758003.1	1590	1325.32	773	157.973
XM_758004.1	1866	1654.65	566	92.6474
XM_758005.1	2121	1534.99	29	5.11698
XM_758006.1	696	453.241	2	1.19515
XM_758007.1	734	519.963	412	214.608
XM_758008.1	2604	2139.06	811	102.688
XM_758009.1	804	558.193	168	81.5167
XM_758010.1	2604	2506.46	743	80.2878
XM_758011.1	885	730.665	252	93.4123
XM_758012.1	1932	1348.1	138	27.7256
XM_758013.1	837	579.159	859	401.714
XM_758014.1	695	482.736	492	276.043
XM_758015.1	984	935.558	996	288.344
XM_758016.1	951	809.886	170	56.8521
XM_758017.1	1974	1756.32	1480	228.234
XM_758018.1	2568	2852.99	1248	118.477
XM_758019.1	531	401.511	470	317.046
XM_758020.1	690	544.648	319	158.634
XM_758021.1	432	357.843	106	80.2297
XM_758022.1	1377	1374.83	669	131.795
XM_758023.1	477	348.113	56	43.5702
XM_758024.1	708	511.283	8	4.2379
XM_758025.1	668	622.72	530	230.518
XM_758026.1	687	605.707	446	199.432
XM_758027.1	2970	3097.16	855	74.7694
XM_758028.1	594	383.76	1	0.705768
XM_758029.1	735	618.868	2	0.875294
XM_758030.1	810	651.785	393	163.309
XM_758031.1	699	675.685	369	147.912
XM_758032.1	2742	2627.1	2260	232.998
XM_758033.1	2007	2223.4	1428	173.954
XM_758034.1	3157	3294.8	2027	166.628
XM_758035.1	1704	1961.53	1192	164.59
XM_758036.1	1998	1946.97	719	100.021
XM_758037.1	1683	1405.13	532	102.546
XM_758038.1	567	430.443	42	26.4275
XM_758039.1	5091	5052.56	186.721	10.0093
XM_758040.1	165	45.9481	183	1078.71
XM_758041.1	135	30.1569	159	1428.01
XM_758042.1	438	257.618	236	248.117
XM_758043.1	2076	1675.18	306	49.4744
XM_758044.1	597	338.222	242	193.792
XM_758045.1	2303	1668.11	864	140.285
XM_758046.1	643	341.496	474	375.937
XM_758047.1	2244	1542.48	166	29.1481
XM_758048.1	1446	1092.13	405	100.439
XM_758049.1	3093	2876.47	1683	158.469
XM_758050.1	1021	713.334	1177	446.895
XM_758051.1	1002	718.154	259	97.6796
XM_758052.1	525	327.74	23	19.0073
XM_758053.1	2997	2407.56	1087	122.285
XM_758054.1	939	727.722	913	339.803
XM_758055.1	363	166.623	98	159.299
XM_758056.1	1233	907.09	245	73.1539
XM_758057.1	339	158.587	98	167.371
XM_758059.1	576	382.627	9	6.37072
XM_758060.1	573	332.015	9	7.34186
XM_758061.1	927	808.703	266	89.0871
XM_758062.1	2076	1932.94	1440	201.774
XM_758063.1	1056	857.247	282	89.0974
XM_758064.1	390	265.786	80	81.523
XM_758065.1	1947	1710.4	410	64.9246
XM_758066.1	786	553.114	45	22.0353
XM_758067.1	1153	879.157	803	247.384
XM_758068.1	2184	1654.13	493	80.7233
XM_758069.1	5301	4727.11	1446	82.8504
XM_758070.1	525	317.76	383	326.454
XM_758071.1	2820	2544.48	870	92.6065
XM_758072.1	1494	1402.15	2860	552.452
XM_758073.1	4302	3877.15	5405	377.577
XM_758074.1	1824	1518.44	111	19.7992
XM_758075.1	387	269.975	74	74.2387
XM_758076.1	447	336.958	113	90.8289
XM_758077.1	411	314.01	2326	2006.26
XM_758078.1	2339	2326.23	2147	249.978
XM_758079.1	483	303.411	109	97.3009
XM_758080.1	675	482.809	407	228.318
XM_758081.1	552	336.418	185	148.941
XM_758082.1	937	753.928	274	98.4333
XM_758083.1	1506	1180.63	248	56.8931
XM_758084.1	1296	1067.49	583	147.92
XM_758085.1	1470	1412.14	247	47.374
XM_758086.1	1350	1016.68	147	39.1611
XM_758087.1	1555	1314.16	473	97.484
XM_758088.1	603	494.04	1487	815.213
XM_758089.1	1995	1519.19	391	69.7086
XM_758090.1	4962	4567.27	2515	149.143
XM_758091.1	420	211.832	113	144.48
XM_758092.1	673	522.612	487	252.39
XM_758093.1	7086	6936.12	9978	389.626
XM_758094.1	720	463.281	153	89.4476
XM_758095.1	6840	5134.72	1127	59.4468
XM_758096.1	2037	1678.75	237	38.2369
XM_758097.1	2967	2439.99	1399	155.293
XM_758098.1	529	295.124	110	100.951
XM_758099.1	417	207.741	70	91.2637
XM_758100.1	951	760.165	227	80.8798
XM_758101.1	501	323.16	336	281.607
XM_758102.1	240	98.9028	628	1719.78
XM_758103.1	351	191.146	919	1302.18
XM_758104.1	1335	1104.3	427	104.728
XM_758105.1	2217	1996.82	906	122.889
XM_758106.1	2253	2112.71	579	74.2268
XM_758107.1	1473	1290.66	863	181.101
XM_758108.1	1647	1563.5	1825	316.145
XM_758109.1	1443	1384.37	384	75.1278
XM_758110.1	5046	5851.3	2014	93.2242
XM_758111.1	1179	935.347	1140	330.106
XM_758112.1	426	203.865	38	50.4851
XM_758113.1	1098	987.612	24	6.58183
XM_758114.1	276	129.319	23	48.1712
XM_758115.1	132	28.6463	11	104.003
XM_758116.1	714	586.352	194	89.6118
XM_758117.1	2871	2248.45	1388	167.197
XM_758118.1	1041	793.468	26	8.87495
XM_758119.1	1107	885.632	50	15.2911
XM_758120.1	2520	2249.1	711	85.6214
XM_758121.1	1989	1738.51	472	73.5337
XM_758122.1	2139	1685.58	33	5.30258
XM_758123.1	453	221.336	143	174.987
XM_758124.1	1172	1078.61	514	129.068
XM_758125.1	2550	2451.39	2106	232.685
XM_758126.1	1530	1408.91	750	144.179
XM_758127.1	4366	3968.48	1419	96.8457
XM_758128.1	2532	2263.27	1239	148.271
XM_758129.1	1173	865.263	312	97.6627
XM_758130.1	1416	1086.58	214	53.3427
XM_758131.1	2097	2031.59	2004	267.168
XM_758132.1	1530	1022.52	38	10.0655
XM_758133.1	903	664.003	108	44.053
XM_758134.1	744	445.416	89	54.1186
XM_758135.1	1740	1495.38	1906	345.217
XM_758136.1	321	170.285	56	89.0703
XM_758137.1	3324	3126.24	1709	148.061
XM_758138.1	3363	3314.83	11	0.898779
XM_758139.1	615	339.841	62	49.4126
XM_758140.1	1517	1362.67	542	107.728
XM_758141.1	1487	1057.86	335	85.7708
XM_758142.1	543	408.113	1	0.663654
XM_758143.1	885	637.556	9	3.82337
XM_758144.1	882	700.393	7	2.70694
XM_758145.1	1512	1426.16	283	53.7453
XM_758146.1	414	262.713	96	98.9717
XM_758147.1	1251	1142.45	340	80.6051
XM_758148.1	561	299.024	350	317.018
XM_758149.1	1251	1079.05	3125	784.386
XM_758150.1	549	362.231	137	102.437
XM_758151.1	631	440.271	658	404.788
XM_758152.1	1500	1429.9	402	76.1453
XM_758153.1	441	287.586	96	90.4117
XM_758154.1	705	466.734	3	1.7409
XM_758155.1	1977	2002.64	833	112.658
XM_758156.1	1563	1418.33	913	174.348
XM_758157.1	1895	1750.45	613	94.8491
XM_758158.1	1391	1048.41	440	113.669
XM_758159.1	759	559.494	9	4.35681
XM_758160.1	3171	2850.41	188	17.8638
XM_758161.1	2746	2422.73	1374	153.605
XM_758162.1	5244	4814.09	2816	158.431
XM_758163.1	1396	894.883	491	148.606
XM_758164.1	1164	662.189	101	41.3106
XM_758165.1	1923	1311.03	230	47.5157
XM_758166.1	3930	2733.91	422	41.8071
XM_758167.1	4281	3451.5	11	0.863191
XM_758168.1	5220	4389.56	16	0.987235
XM_758169.1	2631	1875.24	813	117.424
XM_758170.1	1152	641.977	183	77.2064
XM_758171.1	933	668.841	38	15.388
XM_758172.1	1785	1711.43	12	1.89908
XM_758173.1	1479	1150.32	385	90.649
XM_758174.1	1173	1073.75	603	152.102
XM_758175.1	1233	921.07	246	72.3376
XM_758176.1	2187	1631.76	674	111.873
XM_758177.1	1113	842.001	129	41.4953
XM_758178.1	1218	1183.59	1403	321.054
XM_758179.1	1066	909.682	444	132.195
XM_758180.1	420	225.193	35	42.0955
XM_758181.1	345	180.483	34	51.0227
XM_758182.1	1365	1350.64	2008	402.667
XM_758183.1	1782	1556.99	644	112.027
XM_758184.1	1107	837.51	266	86.0228
XM_758185.1	1353	1067.31	350	88.8176
XM_758186.1	594	433.734	214	133.632
XM_758187.1	1005	740.485	178	65.1067
XM_758188.1	2367	1792.35	1417	214.126
XM_758189.1	1176	1052.53	667	171.638
XM_758190.1	747	550.56	395	194.319
XM_758191.1	1680	1366.43	693	137.362
XM_758192.1	582	405.313	111	74.1744
XM_758193.1	3465	3131.84	21	1.81611
XM_758194.1	828	664.126	217	88.4976
XM_758195.1	2050	1584.17	1162	198.668
XM_758196.1	828	686.069	520	205.285
XM_758197.1	660	341.179	120	95.2623
XM_758198.1	330	178.737	5	7.57664
XM_758199.1	534	292.719	3	2.77583
XM_758200.1	1134	849.084	171	54.5465
XM_758201.1	1080	868.277	713	222.409
XM_758202.1	522	267.185	47	47.6439
XM_758203.1	171	49.4263	81	443.863
XM_758204.1	1881	1601.78	387	65.4381
XM_758205.1	1383	1288.84	816	171.48
XM_758206.1	1494	1506.86	109	19.5919
XM_758207.1	1386	1395.28	276	53.5758
XM_758208.1	1326	1039.28	119	31.0126
XM_758209.1	1332	1169.72	157.912	36.5641
XM_758210.1	1323	1225.36	166.088	36.711
XM_758211.1	339	156.923	29	50.0533
XM_758212.1	2130	2179.64	21	2.60949
XM_758213.1	2103	1762.2	550	84.5336
XM_758214.1	1014	666.918	158	64.1662
XM_758215.1	1773	1463.67	422	78.0893
XM_758216.1	336	157.557	96	165.028
XM_758217.1	8211	8963.51	6483	195.893
XM_758218.1	804	705.011	657	252.401
XM_758219.1	758	638.191	468	198.617
XM_758220.1	1326	1004.15	405	109.239
XM_758221.1	2529	2526.7	836	89.6136
XM_758222.1	1887	1750.69	92	14.2331
XM_758223.1	636	397.291	159.635	108.828
XM_758224.1	2313	2603.27	11	1.14445
XM_758225.1	621	560.528	547	264.309
XM_758226.1	396	201.157	464	624.746
XM_758227.1	900	788.015	425	146.075
XM_758228.1	246	103.69	233	608.613
XM_758229.1	1425	1418.99	342	65.2781
XM_758230.1	2463	2647.25	421	43.0734
XM_758231.1	987	968.714	287	80.2432
XM_758232.1	480	322.737	123	103.223
XM_758233.1	1128	1111.64	257	62.617
XM_758234.1	919	720.452	305	114.661
XM_758235.1	384	226.92	207	247.069
XM_758236.1	3129	3180.61	5077	432.334
XM_758237.1	195	64.8616	145	605.483
XM_758238.1	120	24.0621	152	1710.93
XM_758239.1	1062	1014.94	416	111.013
XM_758240.1	1035	984.242	471	129.611
XM_758241.1	3120	3107.75	1232	107.371
XM_758242.1	645	530.371	209	106.73
XM_758243.1	2580	2619.61	1157	119.624
XM_758244.1	546	430.465	1	0.629193
XM_758245.1	804	616.47	350	153.772
XM_758246.1	573	468.473	342	197.726
XM_758247.1	922	783.246	339	117.226
XM_758248.1	537	350.249	199	153.886
XM_758249.1	201	68.8541	101	397.296
XM_758250.1	294	145.321	17	31.6843
XM_758251.1	315	169.593	22	35.1346
XM_758252.1	3378	2933.95	371	34.2487
XM_758253.1	663	560.002	153	73.9987
XM_758254.1	954	730.434	287	106.42
XM_758255.1	1449	1348.28	510	102.45
XM_758256.1	2421	2238.82	349	42.221
XM_758257.1	852	679.806	307	122.314
XM_758258.1	228	89.4925	77	233.038
XM_758259.1	747	545.123	89	44.2199
XM_758260.1	603	440.037	152	93.5569
XM_758261.1	3012	2390.52	693	78.5167
XM_758262.1	1881	1527.39	376	66.6743
XM_758263.1	1650	1262.21	55.1302	11.8299
XM_758264.1	1671	1375.58	405	79.7427
XM_758265.1	1614	1199.31	421.87	95.273
XM_758266.1	1614	1226.85	415	91.6175
XM_758267.1	1659	1293.57	252	52.7632
XM_758268.1	1662	1291.24	141	29.5756
XM_758269.1	1344	1002.95	566	152.848
XM_758270.1	930	775.941	320	111.697
XM_758271.1	1437	1154.03	677	158.889
XM_758272.1	1706	1616.63	3091	517.857
XM_758273.1	1584	1351.67	436	87.365
XM_758274.1	1374	1209.51	250.332	56.0568
XM_758275.1	1356	1142.34	1182.67	280.406
XM_758276.1	1653	1315.05	453	93.2989
XM_758277.1	616	401.375	403	271.942
XM_758278.1	1475	1144.6	408	96.5449
XM_758279.1	3462	2682.55	1077	108.74
XM_758280.1	270	123.925	0	0
XM_758281.1	264	118.754	1	2.28074
XM_758282.1	303	203.756	1	1.32926
XM_758283.1	360	195.663	2	2.76849
XM_758284.1	1506	1359.89	114	22.7051
XM_758285.1	525	321.018	12	10.1245
XM_758286.1	1368	1240.75	514	112.202
XM_758287.1	4062	3222.04	601	50.5203
XM_758288.1	948	735.004	4	1.47398
XM_758289.1	861	572.934	247	116.765
XM_758290.1	570	553.573	19	9.2961
XM_758291.1	471	306.907	157	138.553
XM_758292.1	633	511.923	232	122.745
XM_758293.1	1329	1151.01	681	160.246
XM_758294.1	5160	4005.34	1690	114.28
XM_758295.1	873	732.351	103	38.0925
XM_758296.1	3036	2405.55	472	53.1435
XM_758297.1	539	332.274	405	330.127
XM_758298.1	374	229.685	633	746.438
XM_758299.1	1070	720.547	428	160.881
XM_758300.1	1356	1324.51	1557	318.386
XM_758301.1	1353	1055.93	1020	261.628
XM_758302.1	4569	4264.64	2810	178.462
XM_758303.1	1624	1592.73	633	107.643
XM_758304.1	4308	3666.73	1390	102.673
XM_758305.1	366	193.334	211	295.594
XM_758306.1	2700	2097.05	1439	185.855
XM_758307.1	2211	1420.76	129	24.5918
XM_758308.1	1521	918.727	49	14.4455
XM_758309.1	777	482.869	128	71.7963
XM_758310.1	3028	2279.09	631	74.9877
XM_758311.1	837	637.388	82	34.8443
XM_758312.1	2991	2507.8	2578	278.427
XM_758313.1	276	129.319	197	412.597
XM_758314.1	1656	1460.68	1326	245.872
XM_758315.1	588	356.939	126	95.6089
XM_758316.1	996	659.624	46	18.8879
XM_758317.1	672	361.044	100	75.0173
XM_758318.1	1134	876.041	175	54.1047
XM_758319.1	1377	1132.62	160	38.2613
XM_758320.1	4275	3637.75	2026	150.844
XM_758321.1	3134	2682.03	562	56.7538
XM_758322.1	4143	3546.94	1814	138.518
XM_758323.1	819	670.232	259	104.664
XM_758324.1	2463	2147.45	1104	139.241
XM_758325.1	1022	793.725	358	122.162
XM_758326.1	2142	1535.84	11	1.93986
XM_758327.1	549	475.042	7	3.99105
XM_758328.1	822	619.354	187	81.7757
XM_758329.1	1791	1779.32	480	73.0649
XM_758330.1	3447	2896.62	811	75.8319
XM_758331.1	507	293.43	152	140.301
XM_758332.1	2040	2149.57	1002	126.252
XM_758333.1	2760	2892.87	824	77.1471
XM_758334.1	822	652.442	579	240.358
XM_758335.1	1241	890.599	337	102.487
XM_758336.1	2601	2125.01	376	47.9234
XM_758337.1	651	445.348	108	65.6819
XM_758338.1	1473	1179.92	368	84.4729
XM_758339.1	462	267.934	117	118.271
XM_758340.1	465	293.966	176	162.158
XM_758341.1	1542	1202.44	245	55.1856
XM_758342.1	561	381.083	329	233.829
XM_758343.1	2757	2313.54	1437	168.229
XM_758344.1	1149	934.499	72	20.8677
XM_758345.1	285	137.239	252	497.331
XM_758346.1	846	592.699	89	40.6703
XM_758347.1	1815	1780.38	9970	1516.71
XM_758348.1	889	639.727	315	133.364
XM_758349.1	1389	1313.27	740	152.616
XM_758350.1	684	455.139	81	48.2017
XM_758351.1	1875	1496.8	486	87.9418
XM_758352.1	1288	1019.36	432	114.783
XM_758353.1	408	242.783	272	303.439
XM_758354.1	861	741.175	597	218.16
XM_758355.1	390	198.314	444	606.39
XM_758356.1	552	301.983	197	176.687
XM_758357.1	1176	770.178	173	60.8382
XM_758358.1	522	385.974	267	187.359
XM_758359.1	1077	883.072	376	115.322
XM_758360.1	1701	1363.58	533	105.869
XM_758361.1	849	630.23	396	170.184
XM_758362.1	351	154.962	3	5.24347
XM_758363.1	1749	1712.16	900	142.371
XM_758364.1	273	126.532	156	333.922
XM_758365.1	2382	2473.87	1959	214.477
XM_758366.1	2151	1460.76	334	61.9281
XM_758367.1	216	80.1293	379	1281.06
XM_758368.1	1402	1705.28	1685	267.624
XM_758369.1	714	625.445	649	281.046
XM_758370.1	1398	1302.52	760	158.034
XM_758371.1	516	365.968	203	150.236
XM_758372.1	869	712.747	953	362.142
XM_758373.1	690	571.193	760	360.373
XM_758374.1	989	792.796	1429	488.194
XM_758375.1	444	336.092	770	620.517
XM_758376.1	480	267.873	129	130.432
XM_758377.1	3249	3164.75	535	45.7864
XM_758378.1	3345	3240.91	711	59.4189
XM_758379.1	1056	916.565	431	127.361
XM_758380.1	636	487.96	617	342.47
XM_758381.1	501	333.882	555	450.217
XM_758382.1	1161	927.784	249	72.6899
XM_758383.1	939	644.093	128	53.8249
XM_758384.1	354	186.032	129	187.813
XM_758385.1	1215	1105.29	347	85.0309
XM_758386.1	972	798.766	29	9.83332
XM_758387.1	3027	3197.71	1799	152.375
XM_758388.1	1575	912.564	188.193	55.855
XM_758389.1	1578	900.026	286.169	86.1171
XM_758390.1	672	375.148	380	274.349
XM_758391.1	1575	894.285	362.993	109.937
XM_758392.1	1566	899.809	423.092	127.352
XM_758393.1	1386	1171.87	1210	279.658
XM_758394.1	1575	894.949	257.614	77.9637
XM_758395.1	1569	923.532	147.716	43.3209
XM_758396.1	1578	900.023	83.2231	25.0445
XM_758397.1	933	760.885	4	1.42385
XM_758398.1	547	403.026	211	141.798
XM_758399.1	2421	2346.3	677	78.1497
XM_758400.1	5691	4975.26	1881	102.399
XM_758401.1	3750	3605.29	2168	162.87
XM_758402.1	987	692.388	777	303.944
XM_758403.1	436	323.9	1715	1434.08
XM_758404.1	1978	1839.49	1064	156.663
XM_758405.1	1970	1465.19	551.468	101.941
XM_758406.1	378	163.551	191	316.302
XM_758407.1	276	151.616	455	812.807
XM_758408.1	1365	1446.62	1177	220.366
XM_758409.1	1380	1409.83	1390	267.037
XM_758410.1	840	653.604	387	160.368
XM_758411.1	699	549.211	1	0.493154
XM_758412.1	2276	2647.18	2250	230.209
XM_758413.1	4218	4952.31	3792	207.388
XM_758414.1	5091	5225.42	2375	123.102
XM_758415.1	1411	1384.36	648	126.779
XM_758416.1	642	450.815	1	0.600792
XM_758417.1	1035	997.354	379	102.923
XM_758418.1	3090	2966.01	1003	91.5906
XM_758419.1	2157	1865.56	3	0.435546
XM_758420.1	381	235.48	113	129.971
XM_758421.1	1072	842.707	601	193.161
XM_758422.1	417	303.486	877	782.677
XM_758423.1	1815	1773	1252	191.257
XM_758424.1	777	585.434	506	234.096
XM_758425.1	2865	3087.07	1713	150.291
XM_758426.1	2376	2234.79	1080	130.891
XM_758427.1	5214	4421.4	982	60.1553
XM_758428.1	1875	1956.95	2487	344.206
XM_758429.1	3189	3300.77	3880	318.374
XM_758430.1	731	507.528	383.146	204.468
XM_758431.1	1184	1073.36	557.854	140.765
XM_758432.1	2808	2103.88	616	79.3015
XM_758433.1	1614	1500.53	340	61.3702
XM_758434.1	570	484.299	6	3.35552
XM_758435.1	1038	848.136	294	93.8867
XM_758436.1	876	581.338	304	141.634
XM_758437.1	1566	1343.88	659	132.815
XM_758438.1	410	205.535	270	355.795
XM_758439.1	615	411.855	51	33.5388
XM_758440.1	842	636.888	282	119.924
XM_758441.1	913	814.676	708	235.38
XM_758442.1	1818	1369.86	522	103.209
XM_758443.1	456	236.238	96	110.064
XM_758444.1	81	11.3979	109	2590.13
XM_758445.1	1095	903.384	187	56.0649
XM_758446.1	2714	2532.31	941	100.646
XM_758447.1	1215	1115.69	406	98.5606
XM_758448.1	1130	882.614	1128	346.147
XM_758449.1	486	396.583	212	144.785
XM_758450.1	1361	1254.03	1140	246.218
XM_758451.1	426	289.467	286	267.601
XM_758452.1	2274	1816.58	1009	150.439
XM_758453.1	2678	2376.09	853	97.2317
XM_758454.1	3219	2662.91	256	26.0378
XM_758455.1	549	539.63	3	1.50573
XM_758456.1	1359	1139.73	1075	255.464
XM_758457.1	348	204.29	263	348.683
XM_758458.1	717	515.605	270	141.83
XM_758459.1	1188	905.759	201	60.1042
XM_758460.1	732	413.796	37	24.2179
XM_758461.1	2358	2183.71	89	11.0387
XM_758462.1	465	326.525	419	347.552
XM_758463.1	2697	3048.11	4541	403.499
XM_758464.1	1725	1613	1099	184.537
XM_758465.1	468	301.415	238	213.862
XM_758466.1	522	391.649	215	148.684
XM_758467.1	2685	3032.95	3012	268.974
XM_758468.1	369	283.505	410	391.692
XM_758469.1	3183	3494.57	595	46.1153
XM_758470.1	1473	1288.31	208	43.7285
XM_758471.1	1470	1437.32	1642	309.415
XM_758472.1	1284	1237.58	949	207.689
XM_758473.1	3633	3607.6	619	46.4723
XM_758474.1	1632	1755.65	643	99.1961
XM_758475.1	483	400.67	504	340.695
XM_758476.1	1494	1531.52	162	28.6492
XM_758477.1	525	410.035	448	295.923
XM_758478.1	1638	1865.65	5147	747.215
XM_758479.1	1624	1797.96	1418	213.608
XM_758480.1	1542	1439.53	382	71.8727
XM_758481.1	1911	1881.07	404	58.1699
XM_758482.1	1023	812.517	710	236.673
XM_758483.1	912	780.38	92	31.9303
XM_758484.1	2674	2446.9	6781	750.584
XM_758485.1	357	175.563	140	215.982
XM_758486.1	798	411.905	174	114.413
XM_758487.1	2208	1662.28	918	149.576
XM_758488.1	2436	1580.1	417	71.4783
XM_758489.1	1138	799.202	295	99.974
XM_758490.1	4134	3281.86	479	39.5309
XM_758491.1	1974	1347.29	515	103.531
XM_758492.1	1344	1027.99	273	71.9275
XM_758493.1	2682	2680.71	1443	145.793
XM_758494.1	975	711.087	648	246.816
XM_758495.1	2371	1858.9	1305	190.142
XM_758496.1	1785	1457.78	298	55.3663
XM_758497.1	1689	1623.42	50.0991	8.35837
XM_758498.1	1536	1428.77	53.9009	10.2178
XM_758499.1	579	381.506	460	326.572
XM_758500.1	3656	2819.96	3417	328.189
XM_758501.1	305	155.382	365	636.23
XM_758502.1	1950	1426.14	985	187.067
XM_758503.1	306	156.318	126	218.315
XM_758504.1	1638	1500.28	1989	359.073
XM_758505.1	285	137.239	105	207.221
XM_758506.1	1883	1350.33	782	156.852
XM_758507.1	1650	1342.14	63	12.7135
XM_758508.1	2862	2403.26	992	111.798
XM_758509.1	465	269.06	494	497.279
XM_758510.1	973	690.095	1046	410.53
XM_758511.1	1548	1372.77	1592	314.099
XM_758512.1	678	574.718	1538	724.808
XM_758513.1	1074	896	1460	441.333
XM_758514.1	1380	1306.38	577	119.627
XM_758515.1	1374	1268.79	341	72.7927
XM_758516.1	924	632.452	72	30.8338
XM_758517.1	918	609.16	120	53.3546
XM_758518.1	744	457.305	149	88.2474
XM_758519.1	372	203.086	49	65.3488
XM_758520.1	513	300.318	242	218.251
XM_758521.1	1209	897.272	178	53.7301
XM_758522.1	1693	1477.49	1864	341.698
XM_758523.1	423	299.074	38	34.4134
XM_758524.1	411	293.46	57	52.6076
XM_758525.1	4743	3427.16	2482	196.151
XM_758526.1	5367	4071.12	4955	329.649
XM_758527.1	876	673.002	1493	600.849
XM_758528.1	1420	1259.98	3465	744.834
XM_758529.1	1330	1134.23	1681	401.409
XM_758530.1	897	570.44	187	88.7878
XM_758531.1	582	302.741	169	151.195
XM_758532.1	4530	3694.81	246	18.0329
XM_758533.1	1419	1223.54	651	144.107
XM_758534.1	372	221.246	208	254.63
XM_758535.1	405	229.708	17	20.0445
XM_758536.1	1104	806.902	404	135.607
XM_758537.1	915	831.48	4519	1472.02
XM_758538.1	461	290.209	802	748.489
XM_758539.1	448	273.572	1244	1231.6
XM_758540.1	441	258.124	366	384.038
XM_758541.1	492	277.532	268	261.543
XM_758542.1	1500	1045.88	1206	312.31
XM_758543.1	3471	2847	1188	113.019
XM_758544.1	504	345.673	672	526.534
XM_758545.1	770	618.435	572	250.509
XM_758546.1	423	218.19	407	505.222
XM_758547.1	1968	1874.6	966	139.57
XM_758548.1	2487	2006.29	1286	173.608
XM_758549.1	1347	917.023	68.2912	20.17
XM_758550.1	1410	1016.12	373.031	99.4308
XM_758551.1	1680	1310.5	106.307	21.9707
XM_758552.1	1437	1089.32	46.2032	11.4878
XM_758553.1	621	344.409	23.465	18.453
XM_758554.1	1320	1092.51	50	12.3956
XM_758555.1	1884	1580.08	88	15.0843
XM_758556.1	1740	1410.55	49	9.40872
XM_758557.1	1527	1268.35	541	115.526
XM_758558.1	1356	976.412	420	116.503
XM_758559.1	1194	836.396	65	21.0486
XM_758560.1	1146	769.295	94	33.0946
XM_758561.1	1310	942.976	37	10.6273
XM_758562.1	1857	1355.12	262	52.3655
XM_758563.1	4542	3544.49	819.57	62.6259
XM_758564.1	3300	2226.4	199	24.2087
XM_758565.1	2010	1463.45	501	92.7218
XM_758566.1	900	559.74	81	39.1941
XM_758567.1	726	443.13	645	394.23
XM_758568.1	1689	1171.11	279	64.5249
XM_758569.1	2910	2438.38	971	107.855
XM_758570.1	1689	1163.87	61	14.1954
XM_758571.1	2106	1730.14	482	75.455
XM_758572.1	2967	2128.87	784	99.7442
XM_758573.1	1191	1008.11	839	225.412
XM_758574.1	711	482.615	318	178.463
XM_758575.1	1305	1083.62	238	59.4869
XM_758576.1	753	542.262	307	153.338
XM_758577.1	1199	1147.06	548	129.394
XM_758578.1	955	786.97	1713	589.55
XM_758579.1	382	155.558	178	309.92
XM_758580.1	763	470.015	119	68.5736
XM_758581.1	2301	2085.35	782	101.566
XM_758582.1	731	491.236	306	168.715
XM_758583.1	828	547.828	256	126.566
XM_758584.1	1084	734.387	195	71.917
XM_758585.1	648	473.023	239	136.848
XM_758586.1	3258	2818.28	1149	110.423
XM_758587.1	741	492.24	320	176.074
XM_758588.1	761	549.121	279	137.612
XM_758590.1	1374	1179.03	1135	260.732
XM_758591.1	534	330.5	173	141.774
XM_758592.1	534	357.881	2604	1970.71
XM_758593.1	1443	1398.14	13571	2628.96
XM_758594.1	650	371.227	119	86.8219
XM_758595.1	459	313.461	37	31.9698
XM_758596.1	1812	1249.76	321	69.5664
XM_758597.1	1206	1006.81	327	87.9675
XM_758598.1	282	134.647	122	245.406
XM_758599.1	2771	2389.15	1291	146.354
XM_758600.1	1386	1131.13	34	8.14119
XM_758601.1	672	470.732	992	570.768
XM_758602.1	602	352.006	250	192.359
XM_758603.1	735	489.231	240	132.868
XM_758604.1	603	425.046	193	122.982
XM_758605.1	1251	1035.44	504	131.834
XM_758606.1	1571	1098.12	704	173.638
XM_758607.1	1464	1006.2	335	90.1741
XM_758608.1	1971	1966.58	4135	569.489
XM_758609.1	3591	3005.79	992	89.387
XM_758610.1	702	464.765	255	148.603
XM_758611.1	687	484.805	244	136.315
XM_758612.1	219	82.3777	126	414.269
XM_758613.1	465	344.913	1672	1312.95
XM_758614.1	2895	2556.65	949	100.535
XM_758615.1	1140	941.362	534	153.641
XM_758616.1	858	707.655	483	184.862
XM_758617.1	2183	1934.56	1091	152.744
XM_758618.1	447	261.668	917	949.163
XM_758619.1	168	47.7207	49	278.106
XM_758620.1	1104	1011.76	564	150.981
XM_758621.1	1237	942.032	627	180.27
XM_758622.1	2358	1953.53	914	126.721
XM_758623.1	2808	2539.64	1282	136.722
XM_758624.1	624	494.346	513	281.066
XM_758625.1	786	643.585	250	105.21
XM_758626.1	2172	1796.22	1	0.150786
XM_758627.1	597	438.174	11	6.79936
XM_758628.1	651	473.079	5	2.86259
XM_758629.1	1071	833.94	12	3.89734
XM_758630.1	2538	2345.95	1498	172.947
XM_758631.1	1695	1645.07	1943	319.897
XM_758632.1	753	641.044	916	387.017
XM_758633.1	1107	913.748	1497	443.728
XM_758634.1	330	178.737	165	250.029
XM_758635.1	1344	1462.8	2639	488.627
XM_758636.1	399	267.34	816	826.699
XM_758637.1	669	557.907	6	2.9128
XM_758638.1	867	702.668	16	6.16725
XM_758639.1	924	813.445	6	1.99777
XM_758640.1	807	506.187	41	21.9379
XM_758641.1	867	641.659	148.365	62.6253
XM_758642.1	822	694.074	40	15.609
XM_758643.1	1080	915.018	9	2.664
XM_758644.1	729	526.415	6	3.08706
XM_758645.1	855	707.927	12	4.59108
XM_758646.1	447	287.818	11	10.3513
XM_758647.1	1329	1542.57	933	163.817
XM_758648.1	2187	2031.88	538	71.7143
XM_758649.1	880	633.935	479	204.65
XM_758650.1	468	341.938	455	360.4
XM_758651.1	357	258.717	237	248.111
XM_758652.1	504	430.665	1110	698.081
XM_758653.1	1191	980.12	873	241.244
XM_758654.1	1455	1193.57	825	187.209
XM_758655.1	982	730.023	701.462	260.249
XM_758656.1	597	478.793	127	71.8419
XM_758657.1	711	535.421	79	39.9626
XM_758658.1	1197	1129.38	65	15.5882
XM_758659.1	1113	1014.73	288.538	77.0152
XM_758660.1	1021	804.427	303	102.018
XM_758661.1	1065	909.389	1400	416.966
XM_758662.1	1185	1079.78	1415	354.929
XM_758663.1	345	217.046	416	519.114
XM_758664.1	1386	1493.6	111	20.1284
XM_758665.1	213	77.9121	10	34.763
XM_758666.1	1434	1447.93	2130	398.432
XM_758667.1	894	801.091	1891	639.339
XM_758668.1	1827	1388.84	10	1.95016
XM_758669.1	1991	1582.4	761.122	130.275
XM_758670.1	1764	1389.21	24	4.67914
XM_758671.1	1383	1173.12	2253	520.166
XM_758672.1	534	328.325	98	80.8434
XM_758673.1	444	273.804	86	85.0707
XM_758674.1	357	200.113	82	110.984
XM_758675.1	510	281.284	113	108.807
XM_758676.1	924	684.373	136	53.823
XM_758677.1	1128	828.505	12	3.92291
XM_758678.1	702	496.113	1	0.545935
XM_758679.1	1578	1328.66	573	116.806
XM_758680.1	1242	981.1	477	131.682
XM_758681.1	1536	1284.14	647	136.463
XM_758682.1	6273	5636.87	1270	61.0222
XM_758683.1	1848	1442.85	686	128.773
XM_758684.1	481	317.084	1543	1318
XM_758685.1	453	247.895	116	126.739
XM_758686.1	1113	802.164	163	55.0359
XM_758687.1	3915	3957.33	7.74274	0.529924
XM_758688.1	930	561.015	154	74.3477
XM_758689.1	1653	1363.75	472	93.7406
XM_758690.1	1001	675.635	128	51.3121
XM_758691.1	1131	706.351	376	144.175
XM_758692.1	564	487.6	95	52.7693
XM_758693.1	987	743.11	468	170.575
XM_758694.1	1296	1021.4	716	189.863
XM_758695.1	7311	4992.17	2365	128.311
XM_758696.1	542	294.805	188	172.721
XM_758697.1	477	326.973	43	35.6187
XM_758698.1	1209	939.503	305	87.9272
XM_758699.1	1518	1094.79	151	37.3566
XM_758700.1	1701	1234.87	376	82.4683
XM_758701.1	1617	1260.43	1215	261.084
XM_758702.1	260	115.396	237	556.262
XM_758703.1	557	309.955	386	337.296
XM_758704.1	351	195.446	985	1365
XM_758705.1	627	436.729	200	124.034
XM_758706.1	1545	1282.3	263	55.5504
XM_758707.1	2127	1797.06	1479	222.909
XM_758708.1	3087	2627.83	1886	194.387
XM_758709.1	873	614.622	58	25.5589
XM_758710.1	726	494.4	56	30.6783
XM_758711.1	1235	809.49	264	88.3313
XM_758712.1	1041	709.354	23	8.78186
XM_758713.1	973	574.338	322	151.848
XM_758714.1	2739	2358.18	355	40.773
XM_758715.1	1314	1097.75	503	124.104
XM_758716.1	2958	2547.67	2446	260.037
XM_758717.1	3561	3649.71	3002	222.779
XM_758718.1	720	398.196	245	166.644
XM_758719.1	999	610.049	270	119.873
XM_758720.1	1440	1229.26	5	1.10166
XM_758721.1	1095	875.866	1902	588.159
XM_758722.1	237	96.4284	239	671.297
XM_758723.1	204	71.081	46	175.277
XM_758724.1	3696	3533.67	1866	143.024
XM_758725.1	1905	1508.91	148	26.5657
XM_758726.1	1791	1325.26	178	36.3782
XM_758727.1	2427	1523.61	592	105.238
XM_758728.1	750	570.05	130	61.7664
XM_758729.1	1158	1148.44	657	154.946
XM_758730.1	600	373.439	62	44.967
XM_758731.1	776	488.885	162	89.7491
XM_758732.1	225	87.0412	21	65.3456
XM_758733.1	846	609.607	53	23.5476
XM_758734.1	333	155.731	43	74.7853
XM_758735.1	1068	794.209	174	59.3385
XM_758736.1	1077	955.631	494	140.01
XM_758737.1	783	606.676	337	150.451
XM_758738.1	1395	1363.5	422	83.8259
XM_758739.1	522	291.188	123	114.407
XM_758740.1	567	325.936	32	26.5913
XM_758741.1	858	734.364	17	6.26988
XM_758742.1	594	391.843	173	119.579
XM_758743.1	989	790.974	607	207.849
XM_758744.1	704	505.41	124	66.4507
XM_758745.1	351	172.482	134	210.418
XM_758746.1	1413	1184.06	401	91.7261
XM_758747.1	1881	1669.18	276	44.7846
XM_758748.1	2108	1616.82	249	41.7119
XM_758749.1	591	381.605	117	83.0413
XM_758750.1	306	156.318	149	258.166
XM_758751.1	4308	4214.63	269	17.2868
XM_758752.1	1155	844.12	281	90.162
XM_758753.1	3741	3349.24	125	10.1085
XM_758754.1	813	640.229	20	8.4609
XM_758755.1	2773	2347.54	1079	124.489
XM_758756.1	4116	3162.81	1727	147.891
XM_758757.1	846	669.229	441	178.478
XM_758758.1	3264	2986.41	2684	243.419
XM_758759.1	431	251.41	651	701.327
XM_758760.1	2916	2641.55	2523	258.691
XM_758761.1	2046	2466.96	2449	268.874
XM_758762.1	1305	980.299	795	219.65
XM_758763.1	549	348.216	4	3.11124
XM_758764.1	1401	1266.9	423	90.4313
XM_758765.1	147	35.9557	75	564.957
XM_758766.1	1299	998.777	721	195.519
XM_758767.1	488	312.277	278	241.117
XM_758768.1	2382	1719.2	512	80.6611
XM_758769.1	5148	4730.89	1143	65.4373
XM_758770.1	2766	2565.57	125	13.1962
XM_758771.1	1479	1317.98	662	136.041
XM_758772.1	1046	1083.56	1864	465.923
XM_758773.1	3429	2918.85	127	11.7846
XM_758774.1	2655	2120.67	435	55.5569
XM_758775.1	1008	932.787	505	146.633
XM_758776.1	1089	894.581	244	73.874
XM_758777.1	597	433.893	323	201.624
XM_758778.1	938	726.212	623	232.352
XM_758779.1	634	467.5	167	96.7514
XM_758780.1	348	195.896	893	1234.66
XM_758781.1	1222	1166.05	1714	398.121
XM_758782.1	984	742.417	136	49.615
XM_758783.1	4290	4781.44	2826	160.079
XM_758784.1	1164	1011.06	585	156.711
XM_758785.1	1087	841.574	588	189.237
XM_758786.1	1494	1491.1	725	131.69
XM_758787.1	2451	2423.79	259	28.9418
XM_758788.1	2202	1938.14	37	5.17057
XM_758789.1	2592	2231.52	2	0.242745
XM_758790.1	1698	1545.98	1359	238.088
XM_758791.1	1035	993.536	565	154.023
XM_758792.1	627	497.494	365	198.713
XM_758793.1	2067	1959.98	1484	205.071
XM_758794.1	1950	1443.06	898	168.544
XM_758795.1	1407	1287.05	608	127.947
XM_758796.1	663	484.496	39	21.802
XM_758797.1	2070	1794.52	723	109.122
XM_758798.1	1515	1516.14	541	96.645
XM_758799.1	1031	838.54	805.329	260.119
XM_758800.1	2916	2766.25	2446.67	239.555
XM_758801.1	414	233.043	166	192.927
XM_758802.1	2898	2825.6	1501	143.877
XM_758803.1	1149	858.739	744	234.657
XM_758804.1	276	129.319	34	71.2096
XM_758805.1	2748	3043.23	3516	312.922
XM_758806.1	1668	1809.03	832	124.566
XM_758807.1	2235	2264.71	694	82.9983
XM_758808.1	763	491.199	1006	554.706
XM_758809.1	1020	956.887	218	61.7046
XM_758810.1	2419	2428.03	3436	383.284
XM_758811.1	714	700.476	140	54.1323
XM_758812.1	1686	1973.7	1431	196.372
XM_758813.1	726	603.448	205	92.0102
XM_758814.1	1599	1453.88	322	59.9859
XM_758815.1	1065	1160.35	203	47.3838
XM_758816.1	393	203.007	55	73.3791
XM_758817.1	7218	6390.18	635	26.9143
XM_758818.1	852	655.11	70	28.9405
XM_758819.1	606	465.322	1078	627.462
XM_758820.1	846	503.793	204	109.673
XM_758821.1	882	542.331	185	92.3908
XM_758822.1	3394	2646.79	586	59.9653
XM_758823.1	306	156.318	233	403.709
XM_758824.1	686	457.161	1274	754.784
XM_758825.1	621	487.748	117	64.9699
XM_758826.1	1290	1035.2	470	122.969
XM_758827.1	1432	1325.34	594	121.389
XM_758828.1	1110	795.112	189	64.3806
XM_758829.1	3606	3041.99	915	81.4677
XM_758830.1	1112	1099.97	4105	1010.78
XM_758831.1	720	511.058	838	444.115
XM_758832.1	1294	1105.31	529	129.627
XM_758833.1	717	810.563	834	278.677
XM_758834.1	1173	935.41	821	237.719
XM_758835.1	1281	1132.62	387	92.5442
XM_758836.1	1269	1026.35	174	45.9173
XM_758837.1	2343	2502.59	2652	287.016
XM_758838.1	117	22.933	89	1051.12
XM_758839.1	2784	2540.91	1547	164.901
XM_758840.1	330	178.737	156	236.391
XM_758841.1	537	362.346	212	158.465
XM_758842.1	1398	1174.83	366	84.3776
XM_758843.1	522	319.337	290	245.963
XM_758844.1	1419	1150.92	675	158.848
XM_758845.1	557	394.096	797	547.744
XM_758846.1	168	47.7207	164	930.805
XM_758847.1	2796	2640.88	353	36.2033
XM_758848.1	1659	1704.18	241	38.3022
XM_758849.1	1062	755.003	676	242.505
XM_758850.1	587	396.177	464	317.213
XM_758851.1	763	540.327	1664	834.1
XM_758852.1	1377	991.191	174	47.546
XM_758853.1	2565	2441.8	1857	205.98
XM_758854.1	423	251.179	282	304.08
XM_758855.1	879	826.437	752	246.451
XM_758856.1	717	590.173	7	3.21248
XM_758857.1	667	541.854	623	311.406
XM_758858.1	2328	2149.31	12035	1516.59
XM_758859.1	719	628.262	742	319.879
XM_758860.1	1074	1024.12	611	161.589
XM_758861.1	783	666.597	311	126.363
XM_758862.1	378	228.462	223	264.371
XM_758863.1	411	285.298	61858	58724.4
XM_758864.1	384	235.187	43093	49626.6
XM_758865.1	2649	2346.61	846	97.6451
XM_758866.1	795	643.015	428	180.279
XM_758867.1	1164	1041.22	296	76.9963
XM_758868.1	861	757.016	85	30.4113
XM_758869.1	1524	1237.54	7	1.53201
XM_758870.1	2439	1993.43	3	0.407608
XM_758871.1	1431	1156.45	600	140.522
XM_758872.1	1914	1440.2	557	104.75
XM_758873.1	363	169.54	152	242.825
XM_758874.1	480	316.412	234	200.302
XM_758875.1	765	534.197	349	176.948
XM_758876.1	3708	3578.61	1207	91.3514
XM_758877.1	1326	1074.02	7	1.76526
XM_758878.1	294	145.321	5	9.3189
XM_758879.1	1497	1191.63	6	1.36374
XM_758880.1	758	531.501	145	73.89
XM_758881.1	1935	1617.06	38	6.36473
XM_758882.1	3573	3759.97	1673	120.513
XM_758883.1	922	725.678	1467	547.53
XM_758884.1	960	836.886	469	151.785
XM_758885.1	1650	1672.15	553	89.5718
XM_758886.1	3672	2946.15	967	88.8984
XM_758887.1	1449	1163.54	886	206.241
XM_758888.1	768	522.813	72	37.2999
XM_758889.1	368	216.965	272	339.548
XM_758890.1	1815	1607.11	503	84.7705
XM_758891.1	732	417.551	3	1.94596
XM_758892.1	553	332.736	324	263.734
XM_758893.1	744	553.37	278	136.066
XM_758894.1	2151	1716.1	55	8.68046
XM_758895.1	1992	1469.02	356	65.6363
XM_758896.1	6399	4992.56	707	38.3546
XM_758897.1	1314	872.395	232	72.0272
XM_758898.1	780	543.99	144	71.6958
XM_758899.1	1572	1468.61	822	151.596
XM_758900.1	1049	782.185	466	161.361
XM_758901.1	3331	2732.06	867	85.951
XM_758902.1	1227	1157.16	226	52.8978
XM_758903.1	1011	856.468	277	87.5973
XM_758904.1	1737	1537.3	244	42.9886
XM_758905.1	3372	3849.74	4495	316.243
XM_758906.1	3210	2761.37	899	88.1772
XM_758907.1	2304	1865.67	543	78.8291
XM_758908.1	831	743.657	533	194.123
XM_758909.1	1284	1133.34	592	141.476
XM_758910.1	948	879.473	429	132.116
XM_758911.1	2877	2652.86	806	82.2893
XM_758912.1	5181	4465.96	1686	102.25
XM_758913.1	618	444.296	161	98.1467
XM_758914.1	1800	1565.66	549	94.9725
XM_758915.1	1689	1651.61	781	128.075
XM_758916.1	1118	918.978	945	278.515
XM_758917.1	921	852.066	151	47.9982
XM_758918.1	870	694.09	304	118.626
XM_758919.1	3678	2978.37	1209	109.944
XM_758921.1	585	297.447	103	93.7884
XM_758922.1	1044	917.661	561	165.578
XM_758923.1	1357	970.345	599	167.195
XM_758924.1	1467	1210.67	754	168.682
XM_758925.1	1185	1418.16	10021	1913.85
XM_758926.1	1191	1185.79	1713	391.265
XM_758927.1	780	709.601	488	186.263
XM_758928.1	771	604.032	157	70.3983
XM_758929.1	684	530.711	1511	771.131
XM_758930.1	3522	2720.8	150	14.9319
XM_758931.1	1890	1648.16	1259	206.894
XM_758932.1	519	317.402	52	44.3726
XM_758933.1	537	353.444	116	88.8912
XM_758934.1	372	194.661	84	116.875
XM_758935.1	738	725.598	926	345.65
XM_758936.1	524	286.907	934	881.713
XM_758937.1	1263	1029.6	766	201.502
XM_758938.1	1567	1381.61	868	170.16
XM_758939.1	1131	975.705	469	130.19
XM_758940.1	3957	3499.61	1703	131.801
XM_758941.1	1074	965.125	65	18.2411
XM_758942.1	2184	1944.64	692	96.3803
XM_758943.1	465	267.098	93	94.3049
XM_758944.1	2025	2003.64	915	123.687
XM_758945.1	829	612.765	234	103.429
XM_758946.1	428	271.461	49150	49038.6
XM_758947.1	2157	2051.63	652	86.0735
XM_758948.1	904	664.605	593	241.665
XM_758949.1	1440	1057.67	3	0.768235
XM_758950.1	699	490.539	5	2.7607
XM_758951.1	3741	3606.38	1767	132.705
XM_758952.1	1683	1456.25	1538	286.05
XM_758953.1	237	96.4284	27	75.8369
XM_758954.1	678	535.879	159	80.3622
XM_758955.1	708	632.284	372	159.35
XM_758956.1	2307	2190.9	705	87.1542
XM_758957.1	873	745.978	421	152.854
XM_758958.1	1503	1355.04	918	183.49
XM_758959.1	1905	1800.14	91	13.6917
XM_758960.1	225	87.0412	11	34.2286
XM_758961.1	444	258.129	34	35.675
XM_758962.1	1671	1420.7	27	5.14734
XM_758963.1	844	815.844	1341	445.188
XM_758964.1	390	204.039	146	193.804
XM_758965.1	2397	2804.35	367	35.4451
XM_758966.1	3123	3176.28	2808	239.442
XM_758967.1	1308	1208.67	23	5.15397
XM_758968.1	2706	2533.18	3807	407.041
XM_758969.1	2634	2234.86	186	22.5416
XM_758970.1	1239	1347.99	157	31.5453
XM_758971.1	354	163.17	32	53.1169
XM_758972.1	537	303.172	186	166.167
XM_758973.1	1806	1425.69	575	109.236
XM_758974.1	1833	1467.99	495	91.328
XM_758975.1	1398	899.22	228	68.6737
XM_758976.1	1149	1050.83	374	96.3961
XM_758977.1	5415	4845.32	1023	57.184
XM_758978.1	1320	1157.16	602	140.905
XM_758979.1	2775	2663.81	4242	431.31
XM_758980.1	1704	1382.41	136.241	26.6927
XM_758981.1	1781	1499.05	1876.76	339.09
XM_758982.1	2232	2010	1366	184.068
XM_758983.1	1476	1581.13	1071	183.461
XM_758984.1	1404	1123.89	266	64.1032
XM_758985.1	1362	1159.75	531	124.009
XM_758986.1	906	687.131	615	242.414
XM_758987.1	960	732.863	4	1.47829
XM_758988.1	1044	889.273	0	0
XM_758989.1	1036	792.959	365	124.671
XM_758990.1	2406	2125.88	201	25.6082
XM_758991.1	1206	955.451	117	33.1665
XM_758992.1	1026	672.739	114	45.8966
XM_758993.1	387	192.736	169	237.491
XM_758994.1	165	45.9481	125	736.825
XM_758995.1	978	744.145	580	211.102
XM_758996.1	3036	3010.33	904	81.3348
XM_758997.1	1671	1574.07	11	1.89273
XM_758998.1	879	821.094	52	17.1527
XM_758999.1	1378	1272.25	365	77.7037
XM_759000.1	2172	1574.98	278	47.8071
XM_759001.1	2055	2025.1	204	27.2838
XM_759002.1	1824	1804.2	422	63.3503
XM_759003.1	1385	1249.92	1430	309.866
XM_759004.1	1800	1518.25	900	160.554
XM_759005.1	2103	1823.99	1276	189.474
XM_759006.1	753	621.259	525	228.88
XM_759007.1	1224	1116.91	233	56.5013
XM_759008.1	504	261.397	115	119.157
XM_759009.1	549	353.469	120	91.9499
XM_759010.1	2430	1976.28	530	72.6357
XM_759011.1	345	190.363	117	166.466
XM_759012.1	2127	1560.33	405	70.301
XM_759013.1	279	131.938	128	262.762
XM_759014.1	2604	2258.95	292	35.0105
XM_759015.1	3663	2965.86	497	45.3866
XM_759016.1	1984	1565.79	708	122.468
XM_759017.1	1238	996.987	300	81.4992
XM_759018.1	150	37.5091	83	599.326
XM_759019.1	2350	2028.6	1277	170.497
XM_759020.1	3327	2942.24	389	35.8091
XM_759021.1	546	302.814	1	0.894429
XM_759022.1	444	218.251	1	1.24098
XM_759023.1	464	255.334	724	767.983
XM_759024.1	1838	1495.4	561	101.608
XM_759025.1	3087	2459.42	516	56.8248
XM_759026.1	1734	1771.62	1829	279.618
XM_759027.1	2907	2606.14	922	95.8197
XM_759028.1	552	301.79	44	39.4885
XM_759029.1	1308	1064.92	1028	261.456
XM_759030.1	558	382.519	85	60.1849
XM_759031.1	261	116.175	52	121.23
XM_759032.1	315	164.745	39	64.1172
XM_759033.1	633	428.692	142	89.7149
XM_759034.1	1311	1242.08	1865	406.679
XM_759035.1	916	683.237	1296	513.754
XM_759036.1	2043	1985.9	1029	140.339
XM_759037.1	1788	1273.19	415	88.2831
XM_759038.1	1548	1297.17	414	86.4423
XM_759039.1	1111	799.924	385	130.357
XM_759040.1	420	222.035	11	13.4182
XM_759041.1	603	427.073	14	8.87866
XM_759042.1	3279	2476.1	954	104.352
XM_759043.1	3135	2709.65	369	36.8837
XM_759044.1	2293	1751.51	985	152.316
XM_759045.1	791	455.036	67	39.8796
XM_759046.1	1678	1379.75	896	175.885
XM_759047.1	225	87.0412	60	186.702
XM_759048.1	2433	1648.95	300	49.2759
XM_759049.1	4686	3650.34	1291	95.7889
XM_759050.1	1599	1273.45	383	81.4587
XM_759051.1	1032	730.337	457	169.479
XM_759052.1	1662	1448.51	782	146.221
XM_759053.1	531	230.687	54	63.4004
XM_759054.1	1137	748.884	158	57.1432
XM_759055.1	432	228.297	74	87.7917
XM_759056.1	1620	1427.7	1008	191.225
XM_759057.1	930	645.439	403	169.111
XM_759058.1	327	174.225	235	365.324
XM_759059.1	948	621.134	196	85.4659
XM_759060.1	3351	3028.67	1019	91.1263
XM_759061.1	3324	2794.07	1398	135.517
XM_759062.1	2917	2455.2	1199	132.268
XM_759063.1	707	508.451	128	68.184
XM_759064.1	2070	1681.67	1004	161.702
XM_759065.1	5478	3994.91	2286	154.986
XM_759066.1	2355	1710.35	617	97.7064
XM_759067.1	1251	966.171	207	58.0281
XM_759068.1	966	826.984	1038	339.955
XM_759069.1	1143	911.68	248	73.6768
XM_759070.1	2262	1995.73	551	74.7776
XM_759071.1	327	174.238	130	202.079
XM_759072.1	2508	2232.58	1018	123.499
XM_759073.1	249	106.112	110	280.769
XM_759074.1	621	420.449	265	170.708
XM_759075.1	774	542.763	271	135.232
XM_759076.1	475	196.982	72	98.9981
XM_759077.1	1083	955.725	84	23.805
XM_759078.1	2910	2334.74	391	45.3586
XM_759079.1	1681	1240.49	842	183.841
XM_759080.1	936	768.979	357	125.741
XM_759081.1	243	101.335	23	61.4739
XM_759082.1	1461	1315.6	677	139.375
XM_759083.1	3633	3328.57	1971	160.38
XM_759084.1	596	474.411	558	318.567
XM_759085.1	105	18.4804	74	1084.53
XM_759086.1	3003	2248.51	184	22.1638
XM_759087.1	630	425.416	187	119.056
XM_759088.1	828	514.046	294	154.906
XM_759089.1	309	151.042	116	208.009
XM_759090.1	1131	879.245	432	133.075
XM_759091.1	2082	1921.51	1743	245.684
XM_759092.1	1039	767.051	514	181.493
XM_759093.1	1335	1037.46	455	118.785
XM_759094.1	1103	723.599	359	134.375
XM_759095.1	871	666.514	218	88.5868
XM_759096.1	405	214.518	58	73.2295
XM_759097.1	372	198.86	35	47.6698
XM_759098.1	2640	2118.81	403	51.5151
XM_759099.1	4851	4174.84	466	30.2321
XM_759100.1	678	441.03	40	24.5648
XM_759101.1	323	172.146	38	59.7872
XM_759102.1	1098	952.172	686	195.133
XM_759103.1	1748	1469.59	2090	385.188
XM_759104.1	1908	2052.24	2022	266.854
XM_759105.1	1315	1235.7	2844	623.358
XM_759106.1	135	30.1569	28	251.474
XM_759107.1	534	437.756	78	48.2597
XM_759108.1	582	368.431	510	374.918
XM_759109.1	659	521.139	413	214.644
XM_759110.1	606	358.532	319	240.982
XM_759111.1	1351	1181.01	288	66.0482
XM_759112.1	303	162.886	193	320.919
XM_759113.1	2193	2403.4	587	66.1506
XM_759114.1	2463	2067.02	1088	142.563
XM_759115.1	4149	4073	888	59.0501
XM_759116.1	2280	2236.68	1490	180.428
XM_759117.1	1272	1079.23	308	77.2966
XM_759118.1	1344	1122.08	553.081	133.502
XM_759119.1	1166	944.667	854.919	245.114
XM_759120.1	1860	1756.19	751	115.822
XM_759121.1	812	521.36	247	128.316
XM_759122.1	1942	1901.91	3223	458.979
XM_759124.1	225	87.0412	1	3.11169
XM_759125.1	144	34.5744	2	15.6674
XM_759126.1	216	80.1293	2	6.76021
XM_759127.1	261	116.175	40	93.2542
XM_759128.1	1245	1109.51	424	103.503
XM_759129.1	1686	1575.43	763	131.174
XM_759130.1	2253	2293.3	4153	490.481
XM_759131.1	414	259.324	71	74.1545
XM_759132.1	3747	3073.38	9	0.793136
XM_759133.1	792	587.554	3	1.38291
XM_759134.1	3477	2930.37	2027	187.35
XM_759135.1	798	633.19	177	75.7114
XM_759136.1	2262	1664.67	678	110.312
XM_759137.1	5325	4506.05	2213	133.017
XM_759138.1	561	253.496	48	51.2852
XM_759139.1	273	126.532	87	186.226
XM_759140.1	996	750.745	12	4.32923
XM_759141.1	648	447.501	2	1.21048
XM_759142.1	2253	1487.37	449	81.7615
XM_759143.1	510	277.68	159	155.087
XM_759144.1	1230	921.229	28	8.23213
XM_759145.1	1169	755.962	297	106.409
XM_759146.1	939	646.997	355	148.61
XM_759147.1	1248	867.201	259	80.8913
XM_759148.1	1182	926.057	147	42.9934
XM_759149.1	1662	1589.56	3981	678.326
XM_759150.1	1035	818.275	223	73.8121
XM_759151.1	2766	2458.79	970	106.849
XM_759152.1	743	517.43	235.55	123.297
XM_759153.1	2192	1855.76	793.45	115.803
XM_759154.1	1350	1116.9	721	174.841
XM_759155.1	357	232.592	179	208.44
XM_759156.1	6081	6250.86	5528	239.525
XM_759157.1	822	725.433	193	72.058
XM_759158.1	529	327.894	2153	1778.41
XM_759159.1	823	535.382	577	291.9
XM_759160.1	755	583.693	373	173.08
XM_759161.1	1770	1516.02	725	129.525
XM_759162.1	1380	1270.86	2207	470.354
XM_759163.1	2517	2270.81	828	98.758
XM_759164.1	1554	1401.84	889	171.761
XM_759165.1	739	549.679	205	101.011
XM_759166.1	983	705.558	367	140.882
XM_759167.1	318	167.525	43	69.5201
XM_759168.1	681	490.188	176	97.2461
XM_759169.1	1113	871.58	75	23.3064
XM_759170.1	1956	1512.33	86	15.4019
XM_759171.1	648	419.137	68	43.9415
XM_759172.1	1103	730.383	238	88.2568
XM_759173.1	1185	904.374	261	78.1654
XM_759174.1	3582	2921.37	591	54.7927
XM_759175.1	582	365.875	194	143.612
XM_759176.1	654	351.53	94	72.4247
XM_759177.1	462	265.926	251	255.643
XM_759178.1	574	328.825	147	121.081
XM_759179.1	1539	1077.04	454	114.168
XM_759180.1	331	179.719	193	290.861
XM_759181.1	2277	1949.22	486	67.5302
XM_759182.1	153	39.2222	89	614.582
XM_759183.1	975	875.273	826	255.599
XM_759184.1	1011	774.011	115	40.2414
XM_759185.1	1533	1400.16	415	80.2769
XM_759186.1	660	480.984	148	83.3399
XM_759187.1	2618	2347.26	2359	272.201
XM_759188.1	2742	2507.45	2513	271.445
XM_759189.1	2370	2156.61	909	114.16
XM_759190.1	4854	4726.85	1189	68.129
XM_759191.1	1761	1565.81	724	125.233
XM_759192.1	903	633.692	605	258.582
XM_759193.1	1518	1060.07	995	254.221
XM_759194.1	400	296.488	177	161.692
XM_759195.1	2202	1760.69	322	49.533
XM_759196.1	1555	1181.75	220	50.4217
XM_759197.1	1776	1161.83	12	2.79743
XM_759198.1	1503	1230.57	569	125.235
XM_759199.1	1578	1284.08	43	9.0698
XM_759200.1	1515	1217.44	139	30.9235
XM_759201.1	2142	2024	651	87.1151
XM_759202.1	1289	1025.03	890	235.165
XM_759203.1	1031	976.1	543	150.67
XM_759204.1	1542	1467.08	673	124.247
XM_759205.1	966	779.131	1613	560.72
XM_759206.1	1305	1124.97	498	119.898
XM_759207.1	2865	2553.41	554	58.764
XM_759208.1	11787	11095.8	4683	114.311
XM_759209.1	1709	1505.13	399	71.7994
XM_759210.1	1401	1193.99	115	26.0867
XM_759211.1	1225	942.999	1060	304.45
XM_759212.1	461	286.522	135	127.614
XM_759213.1	1233	1130.13	341	81.724
XM_759214.1	732	495.346	248	135.602
XM_759215.1	1647	1205.33	1270	285.377
XM_759216.1	195	64.8616	11	45.9332
XM_759217.1	216	80.1293	33	111.544
XM_759218.1	312	158.464	24173.5	41317.2
XM_759219.1	780	524.28	154	79.5572
XM_759220.1	312	158.464	24173.5	41317.2
XM_759221.1	1542	1613.13	275	46.1726
XM_759222.1	576	355.529	294	223.972
XM_759223.1	920	906.685	1665	497.37
XM_759224.1	1058	799.055	485	164.394
XM_759225.1	2136	1472.27	553	101.732
XM_759226.1	1968	2196	4739	584.488
XM_759228.1	273	126.532	195	417.403
XM_759229.1	510	317.131	395	337.35
XM_759230.1	1176	985.751	388	106.607
XM_759231.1	1530	1300.02	533	111.045
XM_759232.1	1026	838.88	597	192.751
XM_759233.1	951	871.089	2154	669.738
XM_759234.1	1137	1037.18	631	164.778
XM_759235.1	4137	4178.84	1210	78.4245
XM_759236.1	666	449.912	91	54.7817
XM_759237.1	168	47.7207	62	351.89
XM_759238.1	2442	2218.76	1061	129.517
XM_759239.1	1665	1467.8	821	151.495
XM_759240.1	1788	1580.97	217	37.1755
XM_759241.1	375	211.065	190	243.814
XM_759242.1	773	521.91	313	162.432
XM_759243.1	1329	1412.33	5419	1039.21
XM_759244.1	672	439.916	14	8.61946
XM_759245.1	468	216.435	132	165.184
XM_759246.1	4446	3616.39	1209	90.5468
XM_759247.1	171	49.4263	20	109.596
XM_759248.1	750	517.68	100	52.3192
XM_759249.1	3738	3082.39	188	16.5193
XM_759250.1	2778	2101.36	26	3.35116
XM_759251.1	1050	730.98	19	7.03996
XM_759252.1	693	384.926	144	101.323
XM_759253.1	594	388.721	202	140.746
XM_759254.1	474	336.763	849	682.818
XM_759255.1	438	317.178	122	104.179
XM_759256.1	1377	1145.69	671	158.627
XM_759257.1	1992	2082.91	1461.87	190.09
XM_759258.1	639	438.563	39.1278	24.1644
XM_759259.1	2835	2675.69	506	51.2197
XM_759260.1	489	325.591	312	259.54
XM_759261.1	1203	990.546	145	39.6474
XM_759262.1	1395	1459.38	1968	365.239
XM_759263.1	933	599.792	261	117.859
XM_759264.1	210	75.6983	55	196.788
XM_759265.1	270	123.925	60	131.134
XM_759266.1	1005	721.105	150	56.3397
XM_759267.1	432	266.005	189.217	192.66
XM_759268.1	1806	1647.41	851.783	140.039
XM_759269.1	1167	909.245	776	231.155
XM_759270.1	2417	1793.51	618	93.3269
XM_759271.1	858	630.948	270	115.902
XM_759272.1	657	431.27	150	94.2028
XM_759273.1	249	106.112	69	176.119
XM_759274.1	2811	2992.35	1579	142.919
XM_759275.1	1098	1019.19	245	65.1078
XM_759276.1	1044	969.351	239	66.7788
XM_759277.1	1317	1062.63	432	110.109
XM_759278.1	3078	3323.51	1187	96.7333
XM_759279.1	436	211.798	634	810.753
XM_759280.1	363	223.471	159	192.707
XM_759281.1	1983	1798.02	1343	202.303
XM_759282.1	2856	2808.8	3477	335.278
XM_759283.1	3033	3338.05	2455	199.196
XM_759284.1	969	866.718	269	84.0614
XM_759285.1	1943	1649.36	623	102.304
XM_759287.1	827	630.386	122	52.4173
XM_759288.1	2412	1975.48	1050	143.959
XM_759289.1	1200	944.745	196	56.1905
XM_759290.1	2007	1774.08	264	40.3043
XM_759291.1	861	932.736	1529	443.987
XM_759292.1	270	123.925	222	485.195
XM_759293.1	678	590.288	537	246.395
XM_759294.1	2193	1911.54	1112	157.559
XM_759295.1	489	334.43	989	800.964
XM_759296.1	1221	915.766	248	73.3481
XM_759297.1	1071	646.251	136	56.998
XM_759298.1	687	555.752	498	242.7
XM_759299.1	3921	3383.3	1378	110.314
XM_759300.1	918	550.46	120	59.0442
XM_759301.1	1311	991.276	311	84.9743
XM_759302.1	1203	1040.22	424	110.399
XM_759303.1	1488	1240.61	457	99.7707
XM_759304.1	186	58.7293	48	221.365
XM_759305.1	1905	1705.68	1237	196.424
XM_759306.1	405	267.051	151	153.146
XM_759307.1	937	709.793	424	161.792
XM_759308.1	459	249.672	173	187.671
XM_759309.1	1956	2130.51	5667	720.428
XM_759310.1	1655	1565.01	744	128.759
XM_759311.1	240	98.9028	419	1147.43
XM_759312.1	630	518.627	711	371.31
XM_759313.1	882	739.813	149	54.5489
XM_759314.1	475	328.018	1251	1032.95
XM_759315.1	933	807.132	857	287.579
XM_759316.1	1721	1218.62	150	33.3385
XM_759317.1	1632	1313.62	601	123.916
XM_759318.1	2063	1948.9	560	77.8251
XM_759319.1	921	659.714	198	81.2889
XM_759320.1	1406	1054.3	694	178.286
XM_759321.1	1424	1428.15	1007	190.975
XM_759322.1	801	536.044	253	127.833
XM_759323.1	1326	936.643	118	34.1216
XM_759324.1	1014	828.055	133	43.5025
XM_759325.1	495	231.393	1	1.1705
XM_759326.1	894	737.995	434	159.279
XM_759327.1	4638	4003.48	981	66.3671
XM_759328.1	2889	2643.98	688	70.4779
XM_759329.1	1146	1004.04	166	44.7794
XM_759330.1	2289	2311.77	2109	247.089
XM_759331.1	1396	1198.27	278	62.8367
XM_759332.1	775	615.1	192	84.5429
XM_759333.1	1810	1658.43	4274	698.005
XM_759334.1	1569	1474.64	1542	283.217
XM_759335.1	534	333.277	182	147.907
XM_759336.1	636	520.774	386	200.752
XM_759337.1	720	541.862	391	195.439
XM_759338.1	1167	973.351	249	69.287
XM_759339.1	882	808.819	822	275.26
XM_759340.1	3213	2995.67	185	16.7263
XM_759341.1	708	433.155	188	117.554
XM_759342.1	837	653.912	160	66.2708
XM_759343.1	642	498.309	369	200.563
XM_759344.1	2703	2455.26	590	65.0843
XM_759345.1	1053	773.405	309	108.211
XM_759346.1	597	375.555	275	198.327
XM_759347.1	1451	1161.88	1134	264.346
XM_759348.1	10767	9865.38	6482	177.958
XM_759349.1	528	409.676	432	285.604
XM_759350.1	978	771.397	424	148.871
XM_759351.1	2142	1613.24	852	143.041
XM_759352.1	1536	1141.97	534	126.651
XM_759353.1	1569	1316.95	543	111.674
XM_759354.1	1068	755.035	277	99.3652
XM_759355.1	2988	2870.87	1460	137.74
XM_759356.1	603	458.824	268	158.201
XM_759357.1	4293	4060.49	1297	86.5134
XM_759358.1	2541	2235.46	1031	124.915
XM_759359.1	405	284.8	72	68.4723
XM_759360.1	743	561.123	186	89.7794
XM_759361.1	525	367.615	409	301.336
XM_759362.1	1448	1467.98	517	95.3879
XM_759363.1	1939	1906.66	1455	206.686
XM_759364.1	2379	2410.47	1235	138.767
XM_759365.1	1590	1633.76	510	84.5482
XM_759366.1	2229	2495.07	936	101.605
XM_759367.1	1262	1140.94	1202	285.342
XM_759368.1	966	738.879	632	231.668
XM_759369.1	3177	3106.64	582	50.7404
XM_759370.1	604	525.712	259	133.436
XM_759371.1	765	694.901	887	345.718
XM_759372.1	929	849.768	749	238.728
XM_759373.1	977	854.474	592	187.648
XM_759374.1	543	286.133	108	102.23
XM_759375.1	2826	2676.05	1637	165.682
XM_759376.1	540	465.386	431	250.834
XM_759377.1	444	262.05	321	331.774
XM_759378.1	1354	879.105	110	33.8902
XM_759379.1	2187	2064.64	1652	216.714
XM_759380.1	471	315.367	286	245.624
XM_759381.1	1599	1274.88	1505	319.734
XM_759382.1	1032	734.452	147	54.2095
XM_759383.1	477	322.453	0	0
XM_759384.1	348	195.861	1	1.38285
XM_759385.1	243	101.335	0	0
XM_759386.1	483	255.276	5	5.30495
XM_759387.1	1803	1412.38	265	50.8178
XM_759388.1	609	462.881	1319	771.786
XM_759389.1	1755	1301.97	1175	244.432
XM_759390.1	873	725.021	178	66.4954
XM_759391.1	1445	1173.85	447	103.137
XM_759392.1	1448	1098.43	351	86.548
XM_759393.1	831	709.185	293	111.9
XM_759394.1	957	775.67	514	179.477
XM_759395.1	888	588.984	270	124.16
XM_759396.1	1248	998.685	404	109.566
XM_759397.1	603	396.447	197	134.587
XM_759398.1	1290	1142.08	269	63.7935
XM_759399.1	1911	1726.97	773	121.232
XM_759400.1	753	479.143	245	138.491
XM_759401.1	324	187.159	130	188.128
XM_759402.1	783	518.742	172	89.8046
XM_759403.1	594	272.853	39	38.7131
XM_759404.1	1119	887.69	449	136.996
XM_759405.1	636	503.82	272	146.223
XM_759406.1	674	559.165	1537	744.485
XM_759407.1	714	433.354	349	218.124
XM_759408.1	522	289.758	269	251.442
XM_759409.1	888	784.466	446	153.986
XM_759410.1	3408	3074.43	1795	158.132
XM_759411.1	519	382.512	208	147.279
XM_759412.1	4407	4193.45	2155	139.187
XM_759413.1	1052	750.306	259	93.4939
XM_759414.1	1911	1507.92	718	128.964
XM_759415.1	1885	1749.46	1252	193.83
XM_759416.1	1746	1699.76	136	21.6707
XM_759417.1	1338	971.036	367	102.365
XM_759418.1	375	209.112	233	301.786
XM_759419.1	4878	4461.92	2466	149.69
XM_759420.1	468	320.789	225	189.97
XM_759421.1	783	600.57	559	252.099
XM_759422.1	1701	1346.7	1035	208.157
XM_759423.1	1365	1252.14	239	51.6971
XM_759424.1	2175	1960.94	1404	193.921
XM_759425.1	1872	1552.75	328	57.2128
XM_759426.1	888	694.405	232	90.4892
XM_759427.1	3862	3540.21	4972	380.386
XM_759428.1	3987	3184.52	1028	87.432
XM_759429.1	1176	1026.45	653	172.305
XM_759430.1	2826	2501.41	541	58.578
XM_759431.1	651	386.696	5	3.50204
XM_759432.1	1068	790.614	414	141.827
XM_759433.1	1128	888.337	553	168.604
XM_759434.1	840	632.901	280	119.824
XM_759435.1	600	444.959	231	140.609
XM_759436.1	649	427.348	397	251.612
XM_759437.1	1477	1272.38	1266	269.487
XM_759438.1	1413	1230.71	972	213.911
XM_759439.1	1063	856.103	912	288.53
XM_759440.1	1470	1210.88	18	4.0262
XM_759441.1	2334	1892.77	468	66.9685
XM_759442.1	2376	1840.3	233	34.2917
XM_759443.1	1191	933.965	196	56.8391
XM_759444.1	810	583.707	14	6.49614
XM_759445.1	4215	3098.4	987	86.2784
XM_759446.1	2274	1848.9	41	6.0061
XM_759447.1	513	303.312	170	151.803
XM_759448.1	453	264.72	331	338.659
XM_759449.1	2031	1512.28	162	29.0138
XM_759450.1	3414	3412.85	714	56.6634
XM_759451.1	4767	3394.49	1316	105.003
XM_759452.1	1738	1607.29	1284	216.368
XM_759453.1	608	437.042	2033	1259.9
XM_759454.1	831	529.821	80	40.8962
XM_759455.1	618	416.224	299	194.566
XM_759456.1	1258	852.137	112	35.5984
XM_759457.1	1489	1265.66	2130	455.811
XM_759458.1	5151	4119.4	229	15.0565
XM_759459.1	1370	917.342	55	16.2388
XM_759460.1	1725	1497.94	432	78.1106
XM_759461.1	1587	1211.43	283	63.2719
XM_759462.1	1299	1012.42	346	92.5627
XM_759463.1	1614	1225.5	418	92.3812
XM_759464.1	1452	1231.23	204	44.8758
XM_759465.1	1644	1334.79	92	18.6679
XM_759466.1	864	569.006	63	29.9879
XM_759467.1	873	547.449	104	51.4531
XM_759468.1	165	45.9481	17	100.208
XM_759469.1	9903	9654.58	218.467	6.12878
XM_759470.1	1590	1342.33	31.6609	6.38832
XM_759471.1	1419	1183.72	473.464	108.332
XM_759472.1	1686	1289.68	227.404	47.7571
XM_759473.1	1347	917.023	68.2912	20.17
XM_759474.1	1536	1117.93	198.589	48.113
XM_759475.1	1569	1139.12	297.421	70.717
XM_759476.1	1410	1002.23	34.7014	9.37784
XM_759477.1	1497	1231.42	29	6.3784
XM_759478.1	2124	1798.06	22	3.31391
XM_759479.1	765	463.396	173.535	101.428
XM_759480.1	1740	1455.95	48.0579	8.94003
XM_759481.1	1713	1412.81	36.4043	6.97896
XM_759482.1	1788	1481.23	75.9421	13.8862
XM_759483.1	1548	1268.12	164.114	35.0517
XM_759484.1	522	272.371	22	21.8768
XM_759485.1	1011	799.413	32	10.8418
XM_759486.1	1353	1046.29	303	78.4357
XM_759487.1	1473	1056.44	52	13.3315
XM_759488.1	2376	1524.56	32	5.68496
XM_759489.1	1338	870.777	27	8.39805
XM_759490.1	1494	932.87	130	37.7437
XM_759491.1	1326	886.942	191.009	58.3285
XM_759492.1	4596	4008.25	400.307	27.0496
XM_759493.1	4599	3670.61	122.317	9.02548
XM_759494.1	1659	1343.64	112	22.5766
XM_759495.1	5373	4475.77	170	10.2873
XM_759496.1	2304	1721.18	786	123.686
XM_759497.1	831	671.384	337	135.95
XM_759498.1	1050	835.707	1295	419.699
XM_759499.1	1965	1515.34	468	83.6482
XM_759500.1	1713	1466.37	449	82.9323
XM_759501.1	3372	3117.78	1036	89.9986
XM_759502.1	501	248.704	137	149.197
XM_759503.1	654	433.868	155	96.7601
XM_759504.1	876	592.031	231	105.679
XM_759505.1	3945	3337.74	784	63.6188
XM_759506.1	1098	668.632	3	1.21522
XM_759507.1	864	709.273	0	0
XM_759508.1	1938	1356.64	7	1.39751
XM_759509.1	2328	2137	608	77.0587
XM_759510.1	1170	1009.56	669	179.479
XM_759511.1	687	455.149	150	89.2606
XM_759512.1	650	438.375	755	466.469
XM_759513.1	1737	1230.87	35.7673	7.87038
XM_759514.1	2053	1577.82	2004	344.003
XM_759515.1	1948	2015.97	1882	252.847
XM_759516.1	1386	1100.74	285	70.1267
XM_759517.1	1053	878.688	900	277.415
XM_759518.1	1041	983.809	398	109.571
XM_759519.1	1752	1235.59	160.233	35.1236
XM_759520.1	1089	1050.11	176	45.3943
XM_759521.1	1072	908.694	798	237.852
XM_759522.1	1239	1321.3	204	41.8168
XM_759523.1	831	606.907	163	72.7424
XM_759524.1	673	508.662	667	355.156
XM_759525.1	1791	1485.04	742	135.328
XM_759526.1	420	243.548	214	237.985
XM_759527.1	2874	2706.69	241	24.1157
XM_759528.1	1755	1557.17	205	35.6565
XM_759529.1	1845	1252.35	21	4.54166
XM_759530.1	1458	1121.37	175	42.2681
XM_759531.1	2751	1918.52	498	70.3049
XM_759532.1	1143	1191.76	291	66.1339
XM_759533.1	1529	1284.06	658	138.791
XM_759534.1	1113	1189.89	232	52.8082
XM_759535.1	2634	2205.71	983	120.705
XM_759536.1	1869	1852.79	184	26.8976
XM_759537.1	1042	1009.35	1094	293.56
XM_759538.1	2580	2624.09	990	102.183
XM_759539.1	1539	1269.26	563	120.138
XM_759540.1	672	498.233	1012	550.136
XM_759541.1	819	673.619	19	7.63943
XM_759542.1	786	637.415	737	313.161
XM_759543.1	747	617.808	756	331.429
XM_759544.1	1035	877.043	248	76.5866
XM_759545.1	285	137.239	199	392.734
XM_759546.1	3270	3072.11	1759	155.078
XM_759547.1	882	586.349	137	63.2829
XM_759548.1	1950	1415.08	654	125.175
XM_759549.1	1206	1038.43	363	94.6786
XM_759550.1	1453	1110.27	316	77.0865
XM_759551.1	3042	2683.27	965	97.406
XM_759552.1	1042	799.408	142	48.1107
XM_759553.1	1446	1255.11	315	67.9754
XM_759554.1	628	411.405	958	630.693
XM_759555.1	1016	736.709	271	99.6311
XM_759556.1	328	176.863	246	376.721
XM_759557.1	792	649.256	304	126.818
XM_759558.1	1145	1089.66	4112	1022.08
XM_759559.1	915	784.472	3687	1272.97
XM_759560.1	843	624.056	121	52.515
XM_759561.1	264	118.754	68	155.09
XM_759562.1	1500	1165.15	261	60.6707
XM_759563.1	2133	2006.76	2944	397.341
XM_759564.1	1428	1099.02	459	113.117
XM_759565.1	708	556.164	1441	701.751
XM_759566.1	794	568.382	1155	550.381
XM_759567.1	438	239.128	212	240.12
XM_759568.1	309	159.157	176	299.508
XM_759569.1	816	668.098	1477	598.773
XM_759570.1	465	253.847	112	119.5
XM_759571.1	1377	1273.77	787	167.342
XM_759572.1	1377	1130.55	645	154.522
XM_759573.1	1839	1395.51	45	8.73375
XM_759574.1	1716	1429.04	33.5215	6.35331
XM_759575.1	1353	1039.08	64.4785	16.8068
XM_759576.1	362	209.515	30	38.7819
XM_759577.1	1196	818.929	386	127.662
XM_759578.1	249	106.112	72	183.776
XM_759579.1	345	193.018	71	99.6283
XM_759580.1	780	499.404	201	109.01
XM_759581.1	675	385.376	194	136.345
[truncated: 2,062 more rows]

## Sheet: Schizont 4_abundance.tsv
target_id	length	eff_length	est_counts	tpm
XM_757577.1	618	206.232	5	6.72789
XM_757578.1	534	175.829	28	44.1908
XM_757579.1	741	352.556	855	672.98
XM_757580.1	237	82.0534	0	0
XM_757581.1	699	237.98	147	171.412
XM_757582.1	426	259.277	441	471.996
XM_757583.1	204	57.0026	1	4.86821
XM_757584.1	363	197.508	497	698.291
XM_757585.1	624	456.953	0	0
XM_757586.1	465	298.082	2	1.86191
XM_757587.1	336	171.365	63	102.019
XM_757588.1	579	214.208	75	97.1605
XM_757589.1	624	268.051	604	625.293
XM_757590.1	306	142.894	1	1.94201
XM_757591.1	117	14.658	24	454.362
XM_757592.1	423	256.303	3	3.24812
XM_757593.1	375	209.143	942	1249.89
XM_757594.1	672	213.526	2	2.59923
XM_757595.1	1236	736.066	4678	1763.63
XM_757596.1	402	235.618	1170	1377.98
XM_757597.1	642	196.261	13	18.3812
XM_757598.1	585	220.1	454	572.4
XM_757599.1	1509	743.036	993	370.855
XM_757600.1	1590	808.946	1323	453.842
XM_757601.1	225	72.6352	20	76.4095
XM_757602.1	294	131.931	0	0
XM_757603.1	183	43.1412	1	6.43238
XM_757604.1	3018	1632.78	2001	340.082
XM_757605.1	1605	871.545	1475	469.642
XM_757606.1	492	324.987	0	0
XM_757607.1	231	77.2158	3	10.7815
XM_757608.1	525	199.49	706.579	982.887
XM_757609.1	162	30.7231	1	9.03231
XM_757610.1	237	82.0534	296.847	1003.92
XM_757611.1	525	196.324	779.402	1101.67
XM_757612.1	162	30.7231	1	9.03231
XM_757613.1	237	82.0534	555.813	1879.74
XM_757614.1	492	179.912	108	166.582
XM_757615.1	381	214.973	825	1064.96
XM_757616.1	237	82.0534	266.34	900.751
XM_757617.1	525	190.408	167.019	243.414
XM_757618.1	1092	510.933	631	342.713
XM_757619.1	948	422.426	109	71.6045
XM_757620.1	693	288.991	189	181.485
XM_757621.1	1407	1301.71	7.49951	1.59876
XM_757622.1	2025	2018.97	8.32743	1.14458
XM_757623.1	2019	2002.61	27.0363	3.74641
XM_757624.1	2214	2257.53	9.09743	1.11828
XM_757625.1	2049	2056.15	3.0173	0.407218
XM_757626.1	1440	1417.63	4.51772	0.884345
XM_757627.1	580	412.953	0	0
XM_757628.1	1467	1435.05	1.77816e-06	3.43849e-07
XM_757629.1	2010	1980.56	19.3581	2.71232
XM_757630.1	1476	1448.76	6.23902	1.19504
XM_757631.1	1407	1301.71	7.49951	1.59876
XM_757632.1	1476	1457.09	6.15241	1.17172
XM_757633.1	1647	1537.06	1.80712	0.326257
XM_757634.1	2007	2019.3	5.05075	0.694094
XM_757635.1	1638	1568.96	2.27046	0.401576
XM_757636.1	1440	1417.63	4.51772	0.884345
XM_757637.1	2049	2056.15	3.0173	0.407218
XM_757638.1	2214	2257.47	264.728	32.5419
XM_757639.1	1473	1455.52	160.447	30.5899
XM_757640.1	1818	1813.52	41	6.27374
XM_757641.1	2010	2026.85	3.66141	0.501291
XM_757642.1	2001	1994.47	3.19029	0.44388
XM_757643.1	1470	1396.94	9.12956	1.81358
XM_757644.1	1218	1050.95	0	0
XM_757645.1	1249	1214.02	4.37935	1.00103
XM_757646.1	1452	1439.3	1.54063e-07	2.97038e-08
XM_757647.1	1452	1418.82	4.60644	0.900957
XM_757648.1	2388	2401.09	144.45	16.6945
XM_757649.1	237	82.0534	61	206.299
XM_757650.1	833	583.423	256	121.765
XM_757651.1	1359	1104.66	721	181.122
XM_757652.1	1807	1102.49	668	168.138
XM_757653.1	222	70.3298	69	272.254
XM_757654.1	1405	1069.52	105	27.2435
XM_757655.1	984	800.591	602	208.665
XM_757656.1	447	229.507	79	95.5204
XM_757657.1	1944	1663.26	442	73.7439
XM_757658.1	1122	826.587	1014	340.419
XM_757659.1	1092	874.429	712	225.954
XM_757660.1	2415	1964.17	1334	188.47
XM_757661.1	405	168.97	337	553.46
XM_757662.1	999	615.071	632	285.139
XM_757663.1	417	223.083	15	18.659
XM_757664.1	951	606.954	24	10.9729
XM_757665.1	684	418.68	16	10.6048
XM_757666.1	867	530.276	2	1.04663
XM_757667.1	816	516.769	119	63.9021
XM_757668.1	399	232.618	0	0
XM_757669.1	729	455.281	61	37.1805
XM_757670.1	1192	916.434	1983	600.463
XM_757671.1	1544	1285.89	931	200.914
XM_757672.1	900	594.407	67	31.2792
XM_757673.1	747	520.363	493	262.909
XM_757674.1	447	269.705	270	277.804
XM_757675.1	2223	2039.43	2469	335.951
XM_757676.1	1032	926.968	885	264.937
XM_757677.1	1404	1121.01	1343	332.453
XM_757678.1	2013	1475.24	238	44.7691
XM_757679.1	297	134.686	167	344.08
XM_757680.1	3687	3352.08	438	36.2597
XM_757681.1	231	77.2158	207	743.924
XM_757682.1	6162	5935.65	5874	274.619
XM_757683.1	1227	910.637	284	86.5441
XM_757684.1	490	340.042	439	358.259
XM_757685.1	3477	3507.25	3647	288.559
XM_757686.1	805	711.505	4101	1599.47
XM_757687.1	984	951.595	374	109.065
XM_757688.1	3246	3333.53	2127	177.063
XM_757689.1	498	378.795	471	345.049
XM_757690.1	1551	1585.38	309	54.0867
XM_757691.1	2154	1837.33	1	0.151035
XM_757692.1	411	203.173	226	308.679
XM_757693.1	1470	1253.48	1096	242.637
XM_757694.1	4716	4983.98	1479	82.3486
XM_757695.1	1173	920.408	40	12.0599
XM_757696.1	582	418.393	391	259.333
XM_757697.1	579	430.255	305	196.715
XM_757698.1	7080	7106.12	2706	105.672
XM_757699.1	5664	5151.86	3261	175.651
XM_757700.1	5766	5501.66	2641	133.211
XM_757701.1	198	52.7478	71	373.524
XM_757702.1	339	174.191	10	15.9308
XM_757703.1	1829	1660.55	1365	228.11
XM_757704.1	747	427.078	328	213.123
XM_757705.1	1116	919.514	102	30.7827
XM_757706.1	3898	3485.17	1252	99.6886
XM_757707.1	1338	1039.52	4	1.06781
XM_757708.1	1800	1699.44	1050	171.454
XM_757709.1	633	472.206	47	27.6205
XM_757710.1	624	500.735	507	280.973
XM_757711.1	546	351.924	26	20.5017
XM_757712.1	1122	819.785	76	25.7263
XM_757713.1	1569	1139.71	460	112.002
XM_757714.1	679	432.297	1033	663.105
XM_757715.1	408	242.829	63	71.9952
XM_757716.1	294	131.931	79	166.167
XM_757717.1	222	70.3298	97	382.734
XM_757718.1	846	519.478	239	127.672
XM_757719.1	1434	1002.83	366	101.278
XM_757720.1	927	755.274	85	31.2305
XM_757721.1	1223	829.376	550	184.025
XM_757722.1	2254	1928.32	3344	481.228
XM_757723.1	1596	1461.55	549	104.237
XM_757724.1	1972	1714.61	773	125.106
XM_757725.1	937	738.156	354	133.082
XM_757726.1	384	210.885	114	150.011
XM_757727.1	5172	4160.71	1113	74.2322
XM_757728.1	1009	789.065	2428	853.886
XM_757729.1	1458	1256.73	749	165.388
XM_757730.1	240	84.524	25	82.0776
XM_757731.1	853	538.089	133	68.5902
XM_757732.1	1779	1243.97	5	1.11538
XM_757733.1	1984	1505.2	299	55.1239
XM_757734.1	1644	1481.31	692	129.636
XM_757735.1	699	484.21	188	107.743
XM_757736.1	1659	1362.97	609	123.993
XM_757737.1	240	84.524	43	141.173
XM_757738.1	177	39.4471	17	119.591
XM_757739.1	219	67.9909	40	163.258
XM_757740.1	1413	1082.87	196	50.2276
XM_757741.1	556	378.416	617	452.46
XM_757742.1	1611	1372.35	1282	259.232
XM_757743.1	273	112.943	117	287.468
XM_757744.1	830	617.704	279	125.339
XM_757745.1	1791	1573.46	725	127.863
XM_757746.1	1359	1256.05	869	191.989
XM_757747.1	589	453.77	1236	755.869
XM_757748.1	744	562.992	1636	806.391
XM_757749.1	1234	1033.02	1009	271.047
XM_757750.1	1182	827.184	101	33.8831
XM_757751.1	1728	1336.49	103.414	21.4723
XM_757752.1	3546	2896.55	103	9.86782
XM_757753.1	1608	1160.44	211	50.4575
XM_757754.1	1995	1875.68	1929	285.39
XM_757755.1	276	115.645	36	86.3851
XM_757756.1	919	794.272	140	48.9129
XM_757757.1	399	225.599	115	141.457
XM_757758.1	420	317.83	11	9.60422
XM_757759.1	1761	1399.26	784	155.482
XM_757760.1	1140	899.407	490	151.183
XM_757761.1	1848	1715.65	2380	384.958
XM_757762.1	801	751.967	298	109.972
XM_757763.1	315	151.37	160	293.321
XM_757764.1	390	168.676	63	103.646
XM_757765.1	999	741.731	269	100.64
XM_757766.1	417	241.34	161	185.123
XM_757767.1	374	208.164	125	166.636
XM_757768.1	2907	2281.11	666	81.02
XM_757769.1	2001	1627.19	51	8.69754
XM_757770.1	249	91.979	20	60.3401
XM_757771.1	2131	1546.73	1264	226.776
XM_757772.1	1734	1299.42	266	56.8064
XM_757773.1	822	595.113	89	41.5006
XM_757774.1	1054	691.34	566	227.19
XM_757775.1	878	660.12	1760	739.868
XM_757776.1	563	398.984	1174	816.539
XM_757777.1	3735	3479.92	1020	81.3384
XM_757778.1	6929	6204.61	3132	140.079
XM_757779.1	2181	1648.66	113.381	19.0842
XM_757780.1	3075	2577.31	112.273	12.0886
XM_757781.1	975	796.384	483	168.302
XM_757782.1	5022	4419.66	2650	166.388
XM_757783.1	162	30.7231	84	758.714
XM_757784.1	1544	1252.76	544	120.502
XM_757785.1	2460	1931.28	3809	547.305
XM_757786.1	715	566.833	2368	1159.29
XM_757787.1	573	320.646	316	273.48
XM_757788.1	609	375.959	51	37.6438
XM_757789.1	1359	1175.21	464	109.564
XM_757790.1	588	334.46	98	81.3105
XM_757791.1	1629	1161.61	281	67.129
XM_757792.1	558	416.466	333	221.885
XM_757793.1	1335	1148.88	1084	261.83
XM_757794.1	7470	6502.32	5191	221.537
XM_757795.1	666	434.174	303	193.661
XM_757796.1	1136	905.881	589	180.43
XM_757797.1	588	427.58	286	185.615
XM_757798.1	585	325.025	24	20.4908
XM_757799.1	1064	662.578	273	114.338
XM_757800.1	324	159.898	165	286.355
XM_757801.1	1374	1017.88	317	86.4227
XM_757802.1	1257	854.791	298	96.7433
XM_757803.1	471	226.011	169	207.502
XM_757804.1	1410	1082.48	345	88.4434
XM_757805.1	451	266.469	195	203.073
XM_757806.1	684	481.315	749	431.834
XM_757807.1	1093	806.147	363	124.956
XM_757808.1	504	266.072	27	28.1597
XM_757809.1	654	466.262	53	31.5435
XM_757810.1	903	576.368	22	10.5922
XM_757811.1	585	378.462	273	200.173
XM_757812.1	699	512.934	245	132.547
XM_757813.1	1476	1136.01	413	100.886
XM_757814.1	357	178.232	194	302.05
XM_757815.1	843	583.078	211	100.42
XM_757816.1	5391	4434.23	123.931	7.7558
XM_757817.1	3468	3078.9	1028	92.6536
XM_757818.1	1859	1654.87	2433	407.983
XM_757819.1	2703	2338.79	575	68.2246
XM_757820.1	1800	1500.33	457	84.5268
XM_757821.1	5280	4231.48	624	40.922
XM_757822.1	696	423.571	448	293.506
XM_757823.1	580	341.599	364	295.699
XM_757824.1	462	292.19	44	41.788
XM_757825.1	2409	2022.21	393	53.93
XM_757826.1	525	361.332	53	40.7037
XM_757827.1	963	853.721	431	140.096
XM_757828.1	1590	1362.09	705	143.631
XM_757829.1	1086	724.9	560	214.375
XM_757830.1	1071	749.238	140	51.8529
XM_757831.1	201	54.7575	34	172.306
XM_757832.1	1062	687.091	5	2.01939
XM_757833.1	1182	928.063	268	80.1349
XM_757834.1	948	822.125	132	44.5554
XM_757835.1	594	441.579	228	143.282
XM_757836.1	945	707.638	75	29.4113
XM_757837.1	231	77.2158	10	35.9384
XM_757838.1	267	107.658	129	332.511
XM_757839.1	1390	1095.9	354	89.6392
XM_757840.1	723	558.761	542	269.177
XM_757841.1	1047	842.754	36	11.854
XM_757842.1	2016	1488.42	576	107.389
XM_757843.1	195	50.8167	139	759.054
XM_757844.1	1008	667.265	132	54.8959
XM_757845.1	306	142.894	37	71.8544
XM_757846.1	450	257.807	60	64.5835
XM_757847.1	2418	2323.83	649	77.5006
XM_757848.1	1459	1309.7	1388	294.09
XM_757849.1	448	229.765	348	420.3
XM_757850.1	339	208.508	453	602.892
XM_757851.1	768	589.431	847	398.763
XM_757852.1	780	680.059	645	263.195
XM_757853.1	2241	2123.11	375	49.0143
XM_757854.1	1697	1333.61	761	158.351
XM_757855.1	1371	1192.13	741	172.488
XM_757856.1	1341	1234.62	644	144.749
XM_757857.1	2492	2321.94	627	74.9344
XM_757858.1	2658	2548.3	565	61.5266
XM_757859.1	3036	3326.05	1850	154.35
XM_757860.1	1269	1154.67	23	5.52755
XM_757861.1	2262	2408.19	2551	293.958
XM_757862.1	673	428.16	257	166.568
XM_757863.1	522	426.975	368	239.172
XM_757864.1	426	241.992	79	90.592
XM_757865.1	2721	2589.88	1381	147.972
XM_757866.1	1053	885.922	6	1.8794
XM_757867.1	770	680.634	693	282.543
XM_757868.1	234	79.6498	200	696.803
XM_757869.1	2724	2406.07	183	21.1061
XM_757870.1	783	583.496	76	36.1443
XM_757871.1	1722	1472.49	579	109.117
XM_757872.1	1391	1109.26	446	111.575
XM_757873.1	1254	1157.77	505	121.041
XM_757874.1	357	179.606	162	250.299
XM_757875.1	270	110.339	366	920.481
XM_757876.1	1389	1141.88	1280	311.066
XM_757877.1	1251	1128.57	184	45.2432
XM_757878.1	1731	1581.56	344	60.3582
XM_757879.1	1068	815.579	230	78.2575
XM_757880.1	1771	1435.49	1601	309.496
XM_757881.1	1194	849.773	69	22.5326
XM_757882.1	660	319.036	181	157.436
XM_757883.1	1431	1318.65	1568	329.976
XM_757884.1	737	453.91	323	197.468
XM_757885.1	582	406.82	297	202.59
XM_757886.1	633	346.329	213	170.669
XM_757887.1	1584	1094.9	6	1.52069
XM_757888.1	1062	793.136	294	102.864
XM_757889.1	640	443.943	427	266.91
XM_757890.1	840	617.684	339	152.299
XM_757891.1	576	336.514	16	13.1942
XM_757892.1	866	658.44	2049	863.556
XM_757893.1	4359	3850.47	2931	211.235
XM_757894.1	4341	3746.5	519	38.442
XM_757895.1	5895	4855.85	192	10.9724
XM_757896.1	4128	3602.91	259.471	19.9848
XM_757897.1	2343	1705.07	29	4.71977
XM_757898.1	1209	755.686	113	41.4956
XM_757899.1	1560	1151.1	314	75.6975
XM_757900.1	1564	1253.65	333	73.7112
XM_757901.1	1173	862.936	7	2.25104
XM_757902.1	1692	1401.07	111.587	22.1014
XM_757903.1	1989	1621.58	54.5145	9.32905
XM_757904.1	1296	948.242	83.6111	24.4686
XM_757905.1	1533	1175.61	22.5028	5.31177
XM_757906.1	1920	1554.63	56.5	10.0852
XM_757907.1	1530	1227.61	67.7512	15.3152
XM_757908.1	447	220.857	15	18.8471
XM_757909.1	1026	754.287	37	13.6122
XM_757910.1	1530	1173.59	25.4972	6.02895
XM_757911.1	1920	1554.63	56.5	10.0852
XM_757912.1	1830	1449.75	457.249	87.5234
XM_757913.1	1707	1320.08	291	61.1724
XM_757914.1	1824	1428.96	190.226	36.9416
XM_757915.1	1614	1190.14	28	6.52867
XM_757916.1	1989	1621.58	54.5145	9.32905
XM_757917.1	1446	1047.12	115.389	30.5796
XM_757918.1	1395	1019.99	423	115.082
XM_757919.1	1398	1040.56	511	136.276
XM_757920.1	1095	835.575	367	121.884
XM_757921.1	1275	908.31	162	49.4932
XM_757922.1	1344	1070.17	104	26.9678
XM_757923.1	462	206.74	84	112.751
XM_757924.1	1854	1456.71	61	11.6204
XM_757925.1	1305	1152.7	67.3892	16.2232
XM_757926.1	1590	1329.26	49.8726	10.4115
XM_757927.1	1476	1190.44	469.531	109.452
XM_757928.1	1476	1193.41	339	78.8268
XM_757929.1	1098	715.923	161	62.4056
XM_757930.1	1707	1273.56	146.63	31.9499
XM_757931.1	1503	1155.25	215	51.6447
XM_757932.1	552	252.204	15	16.5045
XM_757933.1	4590	3737.56	337.623	25.0674
XM_757934.1	2736	2363.51	63	7.39686
XM_757935.1	711	527.406	170	89.4475
XM_757936.1	852	505.68	596	327.065
XM_757937.1	1679	1594.27	648	112.792
XM_757938.1	429	213.702	103	133.75
XM_757939.1	2222	1900.08	1869	272.962
XM_757940.1	1104	992.68	798	223.079
XM_757941.1	1353	1218.33	356	81.0866
XM_757942.1	177	39.4471	50	351.738
XM_757943.1	1065	885.848	560	175.426
XM_757944.1	297	134.686	156	321.416
XM_757945.1	1287	1091.07	445	113.18
XM_757946.1	1068	837.105	363	120.335
XM_757947.1	2184	1951.08	7	0.995608
XM_757948.1	1440	1261.11	22	4.84099
XM_757949.1	1215	1143.35	446	108.248
XM_757950.1	270	110.339	61	153.413
XM_757951.1	869	686.059	587	237.433
XM_757952.1	765	676.842	62	25.4196
XM_757953.1	402	228.04	275	334.646
XM_757954.1	1635	1510.22	771	141.67
XM_757955.1	612	398.889	276	192.009
XM_757956.1	1227	1118.71	251	62.2614
XM_757957.1	774	672.501	40	16.5056
XM_757958.1	998	781.343	134	47.5913
XM_757959.1	1524	1199.08	556.752	128.848
XM_757960.1	606	422.61	174	114.255
XM_757961.1	564	429.215	243	157.107
XM_757962.1	867	760.729	301	109.8
XM_757963.1	432	269.183	592	610.293
XM_757964.1	1131	1016.84	1163	317.389
XM_757965.1	606	414.005	15	10.0542
XM_757966.1	1314	1318.74	7	1.47301
XM_757967.1	1323	1188.26	1475	344.464
XM_757968.1	363	197.508	124	174.222
XM_757969.1	273	112.943	93	228.5
XM_757970.1	390	234.407	487	576.532
XM_757971.1	1434	1507	511	94.0964
XM_757972.1	951	817.237	1053	357.556
XM_757973.1	1581	1415.71	1243	243.647
XM_757974.1	5043	5116.44	2487	134.888
XM_757975.1	1336	1112.67	562	140.163
XM_757976.1	480	296.099	530	496.711
XM_757977.1	555	401.727	321	221.737
XM_757978.1	649	426.047	1816	1182.83
XM_757979.1	540	298.968	135	125.306
XM_757980.1	1506	1052.28	294	77.5321
XM_757981.1	1796	1485.01	1021	190.793
XM_757982.1	1542	1264.17	37	8.12195
XM_757983.1	1257	1007.45	21	5.78442
XM_757984.1	660	485.211	614	351.157
XM_757985.1	3745	3607.77	8132	625.493
XM_757986.1	414	221.421	5	6.26637
XM_757987.1	1806	1518.22	480	87.7344
XM_757988.1	888	612.847	243	110.032
XM_757989.1	1422	1281.38	188.553	40.8338
XM_757990.1	1428	1263.1	1634.45	359.084
XM_757991.1	2011	1665.06	564	93.9972
XM_757992.1	2010	1437.87	700	135.096
XM_757993.1	321	165.98	930	1554.87
XM_757994.1	234	79.6498	169	588.798
XM_757995.1	627	510.931	358	194.44
XM_757996.1	849	708.438	68	26.6362
XM_757997.1	1600	1388.55	393	78.5406
XM_757998.1	774	637.462	417	181.529
XM_757999.1	432	265.277	2	2.09216
XM_758000.1	783	607.135	208	95.0698
XM_758001.1	510	302.184	200	183.664
XM_758002.1	525	295.599	158	148.327
XM_758003.1	1590	1326.91	703	147.021
XM_758004.1	1866	1640.27	516	87.2969
XM_758005.1	2121	1556.85	40	7.12978
XM_758006.1	696	441.552	3	1.8854
XM_758007.1	734	503.293	428	235.986
XM_758008.1	2604	2167.89	728	93.1879
XM_758009.1	804	552.798	154	77.3069
XM_758010.1	2604	2500.08	711	78.9187
XM_758011.1	885	724.907	217	83.0695
XM_758012.1	1932	1384.43	119	23.8529
XM_758013.1	837	580.804	803	383.664
XM_758014.1	695	466.78	443	263.364
XM_758015.1	984	908.119	823	251.49
XM_758016.1	951	789.31	156	54.8455
XM_758017.1	1974	1748.64	1431	227.093
XM_758018.1	2568	2786.22	1049	104.478
XM_758019.1	531	385.824	421	302.801
XM_758020.1	690	534.045	323	167.837
XM_758021.1	432	330.219	128	107.565
XM_758022.1	1377	1339.13	535	110.866
XM_758023.1	477	341.556	53	43.0604
XM_758024.1	708	503.924	10	5.5068
XM_758025.1	668	592.437	475	222.493
XM_758026.1	687	593.838	354	165.424
XM_758027.1	2970	3063.09	814	73.7444
XM_758028.1	594	426.953	0	0
XM_758029.1	735	602.96	3	1.38069
XM_758030.1	810	632.788	306	134.192
XM_758031.1	699	627.431	297	131.358
XM_758032.1	2742	2602.05	2140	228.224
XM_758033.1	2007	2162.6	1210	155.265
XM_758034.1	3157	3267	1794	152.383
XM_758035.1	1704	1893.37	1220	178.808
XM_758036.1	1998	1918.33	700	101.26
XM_758037.1	1683	1405.71	443	87.4527
XM_758038.1	567	411.99	38	25.5954
XM_758039.1	5091	5039.69	197.457	10.8726
XM_758040.1	165	32.4168	188	1609.35
XM_758041.1	135	18.8481	152	2237.9
XM_758042.1	438	241.153	231	265.817
XM_758043.1	2076	1676.75	258	42.6989
XM_758044.1	597	340.853	206	167.712
XM_758045.1	2303	1702.35	830	135.299
XM_758046.1	643	336.422	442	364.588
XM_758047.1	2244	1560.97	163	28.9772
XM_758048.1	1446	1083.56	388	99.3675
XM_758049.1	3093	2872.1	1447	139.808
XM_758050.1	1021	716.328	1032	399.79
XM_758051.1	1002	719.748	244	94.0749
XM_758052.1	525	318.595	20	17.4203
XM_758053.1	2997	2435.34	949	108.136
XM_758054.1	939	727.153	845	322.475
XM_758055.1	363	197.508	83	116.616
XM_758056.1	1233	913.178	268	81.4411
XM_758057.1	339	174.191	128	203.915
XM_758059.1	576	381.756	21	15.265
XM_758060.1	573	324.815	11	9.39769
XM_758061.1	927	788.857	238	83.7227
XM_758062.1	2076	1923.18	1404	202.587
XM_758063.1	1056	840.772	240	79.2132
XM_758064.1	390	240.186	100	115.536
XM_758065.1	1947	1709.29	343	55.6856
XM_758066.1	786	544.439	37	18.8589
XM_758067.1	1153	877.384	732	231.518
XM_758068.1	2184	1666.49	421	70.1041
XM_758069.1	5301	4740.17	1268	74.2317
XM_758070.1	525	303.748	354	323.411
XM_758071.1	2820	2548.82	782	85.1397
XM_758072.1	1494	1387.3	2827	565.481
XM_758073.1	4302	3888.41	4978	355.261
XM_758074.1	1824	1514.89	74	13.5555
XM_758075.1	387	244.735	75	85.0414
XM_758076.1	447	304.9	103	93.7443
XM_758077.1	411	292.862	2371	2246.64
XM_758078.1	2339	2291.62	1929	233.59
XM_758079.1	483	293.137	95	89.9327
XM_758080.1	675	479.217	354	204.991
XM_758081.1	552	332.17	196	163.742
XM_758082.1	937	738.896	256	96.1438
XM_758083.1	1506	1183.1	216	50.6635
XM_758084.1	1296	1056.31	495	130.041
XM_758085.1	1470	1389.54	182	36.3468
XM_758086.1	1350	1026.82	130	35.1329
XM_758087.1	1555	1309.52	418	88.5788
XM_758088.1	603	471.324	1407	828.398
XM_758089.1	1995	1525.78	339	61.6556
XM_758090.1	4962	4565	2065	125.529
XM_758091.1	420	207.204	78	104.462
XM_758092.1	673	504.991	428	235.193
XM_758093.1	7086	6928.73	8866	355.09
XM_758094.1	720	454.404	122	74.5045
XM_758095.1	6840	5262.65	1034	54.523
XM_758096.1	2037	1678.08	197	32.5776
XM_758097.1	2967	2455.72	1220	137.862
XM_758098.1	529	291.444	96	91.4073
XM_758099.1	417	200.968	74	102.181
XM_758100.1	951	752.232	254	93.7014
XM_758101.1	501	312.509	292	259.29
XM_758102.1	240	84.524	637	2091.34
XM_758103.1	351	177.68	709	1107.31
XM_758104.1	1335	1093.68	422	107.075
XM_758105.1	2217	1988.02	885	123.534
XM_758106.1	2253	2103.76	593	78.221
XM_758107.1	1473	1271.3	738	161.091
XM_758108.1	1647	1546.64	1754	314.705
XM_758109.1	1443	1369.11	354	71.7513
XM_758110.1	5046	5752.29	1877	90.5499
XM_758111.1	1179	935.113	1095	324.948
XM_758112.1	426	200.632	41	56.7084
XM_758113.1	1098	960.604	20	5.77764
XM_758114.1	276	115.645	32	76.7868
XM_758115.1	132	17.861	8	124.294
XM_758116.1	714	562.101	196	96.7624
XM_758117.1	2871	2283.75	1308	158.937
XM_758118.1	1041	777.73	22	7.84979
XM_758119.1	1107	879.467	50	15.7767
XM_758120.1	2520	2245.97	645	79.6931
XM_758121.1	1989	1729.57	444	71.2375
XM_758122.1	2139	1691.08	32	5.2511
XM_758123.1	453	215.919	97	124.665
XM_758124.1	1172	1035.46	471	126.227
XM_758125.1	2550	2425.75	1944	222.389
XM_758126.1	1530	1387.38	736	147.213
XM_758127.1	4366	3975.13	1144	79.8618
XM_758128.1	2532	2276.92	1153	140.523
XM_758129.1	1173	863.018	288	92.6056
XM_758130.1	1416	1101.03	177	44.6107
XM_758131.1	2097	2006.84	1770	244.751
XM_758132.1	1530	1040.42	45	12.0024
XM_758133.1	903	650.819	130	55.4303
XM_758134.1	744	441.691	77	48.3767
XM_758135.1	1740	1491.72	1725	320.898
XM_758136.1	321	157.043	58	102.488
XM_758137.1	3324	3118.54	1649	146.735
XM_758138.1	3363	3283.17	22	1.85949
XM_758139.1	615	341.02	60	48.8243
XM_758140.1	1517	1357.03	503	102.859
XM_758141.1	1487	1056.48	330	86.6796
XM_758142.1	543	390.073	7	4.97986
XM_758143.1	885	631.228	6	2.63772
XM_758144.1	882	684.163	8	3.24485
XM_758145.1	1512	1405.04	265	52.3385
XM_758146.1	414	246.63	79	88.8884
XM_758147.1	1251	1121.96	290	71.7272
XM_758148.1	561	295.939	288	270.056
XM_758149.1	1251	1064.78	2947	768.045
XM_758150.1	549	343.753	122	98.4867
XM_758151.1	631	427.026	586	380.809
XM_758152.1	1500	1412.2	376	73.8848
XM_758153.1	441	272.385	91	92.7092
XM_758154.1	705	466.752	7	4.16175
XM_758155.1	1977	1975.53	726	101.98
XM_758156.1	1563	1413.88	921	180.764
XM_758157.1	1895	1740.54	622	99.1676
XM_758158.1	1391	1054.27	378	99.4957
XM_758159.1	759	535.863	18	9.32144
XM_758160.1	3171	2851.97	168	16.3467
XM_758161.1	2746	2420	1254	143.796
XM_758162.1	5244	4831.63	2554	146.687
XM_758163.1	1396	906.393	403	123.382
XM_758164.1	1164	684.094	100	40.5647
XM_758165.1	1923	1340.72	185	38.2912
XM_758166.1	3930	2817.26	381	37.5286
XM_758167.1	4281	3504.28	14	1.10865
XM_758168.1	5220	4443.57	25	1.56125
XM_758169.1	2631	1910.79	680	98.7555
XM_758170.1	1152	654.936	141	59.7427
XM_758171.1	933	669.925	29	12.0126
XM_758172.1	1785	1670.19	9	1.49534
XM_758173.1	1479	1151.68	302	72.7675
XM_758174.1	1173	1058.44	575	150.754
XM_758175.1	1233	916.047	199	60.2837
XM_758176.1	2187	1643.58	518	87.4588
XM_758177.1	1113	843.526	116	38.1614
XM_758178.1	1218	1152.5	1424	342.873
XM_758179.1	1066	898.834	421	129.977
XM_758180.1	420	215.256	31	39.9641
XM_758181.1	345	170.552	23	37.4227
XM_758182.1	1365	1328.87	1887	394.051
XM_758183.1	1782	1548.58	606	108.593
XM_758184.1	1107	830.074	231	77.2253
XM_758185.1	1353	1065	319	83.12
XM_758186.1	594	421.27	225	148.213
XM_758187.1	1005	729.484	153	58.2023
XM_758188.1	2367	1812.45	1164	178.218
XM_758189.1	1176	1031.25	629	169.259
XM_758190.1	747	537.005	327	168.979
XM_758191.1	1680	1366.2	594	120.653
XM_758192.1	582	400.898	103	71.2963
XM_758193.1	3465	3118.24	14	1.2459
XM_758194.1	828	651.504	171	72.8355
XM_758195.1	2050	1594.29	969	168.664
XM_758196.1	828	678.067	459	187.847
XM_758197.1	660	335.358	97	80.2653
XM_758198.1	330	165.619	1	1.67554
XM_758199.1	534	289.874	3	2.87195
XM_758200.1	1134	848.387	152	49.718
XM_758201.1	1080	864.639	685	219.847
XM_758202.1	522	268.046	36	37.2698
XM_758203.1	171	35.8118	68	526.923
XM_758204.1	1881	1596.87	316	54.9137
XM_758205.1	1383	1280.15	775	167.998
XM_758206.1	1494	1470.14	213	40.2056
XM_758207.1	1386	1359.99	284	57.9492
XM_758208.1	1326	1030.26	94	25.3189
XM_758209.1	1332	1151.45	153.438	36.979
XM_758210.1	1323	1211.16	173.562	39.7663
XM_758211.1	339	174.191	34	54.1648
XM_758212.1	2130	2134.63	15	1.95
XM_758213.1	2103	1764.6	519	81.6177
XM_758214.1	1014	669.176	143	59.3007
XM_758215.1	1773	1455.54	339	64.6308
XM_758216.1	336	171.365	97	157.077
XM_758217.1	8211	8883.94	5692	177.797
XM_758218.1	804	682.539	624	253.701
XM_758219.1	758	623.869	376	167.247
XM_758220.1	1326	995.148	289	80.5888
XM_758221.1	2529	2512.27	810	89.4711
XM_758222.1	1887	1739.71	74	11.8037
XM_758223.1	636	386.694	101	72.4801
XM_758224.1	2313	2538.64	18	1.9676
XM_758225.1	621	543.079	487	248.846
XM_758226.1	396	193.776	389	557.075
XM_758227.1	900	763.533	381	138.472
XM_758228.1	246	89.4861	221	685.332
XM_758229.1	1425	1400.46	363	71.9286
XM_758230.1	2463	2611.59	381	40.4841
XM_758231.1	987	919.07	261	78.8055
XM_758232.1	480	306.452	87	78.7809
XM_758233.1	1128	1089.89	247	62.8895
XM_758234.1	919	700.233	299	118.493
XM_758235.1	384	215.633	204	262.53
XM_758236.1	3129	3133.33	4674	413.95
XM_758237.1	195	50.8167	121	660.759
XM_758238.1	120	15.0866	137	2519.96
XM_758239.1	1062	990.045	410	114.919
XM_758240.1	1035	969.417	386	110.495
XM_758241.1	3120	3090.36	1140	102.367
XM_758242.1	645	504.15	219	120.545
XM_758243.1	2580	2587.68	1018	109.17
XM_758244.1	546	405.927	2	1.36725
XM_758245.1	804	612.38	293	132.773
XM_758246.1	573	448.406	325	201.13
XM_758247.1	922	766.938	327	118.318
XM_758248.1	537	344.957	169	135.952
XM_758249.1	201	54.7575	109	552.392
XM_758250.1	294	131.931	10	21.0338
XM_758251.1	315	151.37	13	23.8323
XM_758252.1	3378	2941.59	341	32.1689
XM_758253.1	663	541.553	137	70.2011
XM_758254.1	954	709.062	235	91.9703
XM_758255.1	1449	1326.17	455	95.2087
XM_758256.1	2421	2228.53	335	41.7149
XM_758257.1	852	668.693	291	120.762
XM_758258.1	228	74.9041	71	263.037
XM_758259.1	747	531.167	75	39.1828
XM_758260.1	603	430.347	161	103.818
XM_758261.1	3012	2398.72	562	65.0161
XM_758262.1	1881	1532.8	340	61.5544
XM_758263.1	1650	1269.27	90.9147	19.8767
XM_758264.1	1671	1375.94	350	70.5885
XM_758265.1	1614	1207.72	416.085	95.6048
XM_758266.1	1614	1233.15	436	98.1148
XM_758267.1	1659	1300.75	241	51.4149
XM_758268.1	1662	1287.88	122	26.2875
XM_758269.1	1344	1000.43	486	134.807
XM_758270.1	930	763.56	283	102.851
XM_758271.1	1437	1139.29	633	154.182
XM_758272.1	1706	1603.83	2938	508.346
XM_758273.1	1584	1335.32	433	89.984
XM_758274.1	1374	1200.68	217.444	50.2553
XM_758275.1	1356	1137.34	1045.56	255.107
XM_758276.1	1653	1309.52	413	87.5188
XM_758277.1	616	395.022	319	224.096
XM_758278.1	1475	1136.23	403	98.4241
XM_758279.1	3462	2736.21	938	95.1301
XM_758280.1	270	110.339	5	12.5749
XM_758281.1	264	105.083	6	15.8447
XM_758282.1	303	140.124	5	9.90196
XM_758283.1	360	188.149	2	2.9498
XM_758284.1	1506	1342.32	99	20.4664
XM_758285.1	525	306.516	13	11.7694
XM_758286.1	1368	1204.36	433	99.769
XM_758287.1	4062	3261.71	514	43.7302
XM_758288.1	948	722.311	2	0.76837
XM_758289.1	861	570.604	212	103.102
XM_758290.1	570	527.231	20	10.5267
XM_758291.1	471	294.556	147	138.488
XM_758292.1	633	487.345	228	129.826
XM_758293.1	1329	1140.04	635	154.567
XM_758294.1	5160	4074.03	1571	107.008
XM_758295.1	873	720.596	84	32.3483
XM_758296.1	3036	2454.96	488	55.1621
XM_758297.1	539	324.91	333	284.41
XM_758298.1	374	219.947	641	808.732
XM_758299.1	1070	721.034	311	119.693
XM_758300.1	1356	1299.11	1413	301.83
XM_758301.1	1353	1064.67	970	252.825
XM_758302.1	4569	4257.6	2635	171.743
XM_758303.1	1624	1567.36	562	99.5018
XM_758304.1	4308	3714.01	1251	93.4715
XM_758305.1	366	177.774	194	302.829
XM_758306.1	2700	2117.2	1365	178.91
XM_758307.1	2211	1462.97	106	20.1064
XM_758308.1	1521	949.706	42	12.2723
XM_758309.1	777	479.776	103	59.5749
XM_758310.1	3028	2315.43	642	76.9427
XM_758311.1	837	629.566	66	29.0916
XM_758312.1	2991	2519.79	2197	241.952
XM_758313.1	276	115.645	172	412.729
XM_758314.1	1656	1443.15	1255	241.321
XM_758315.1	588	349.936	95	75.3355
XM_758316.1	996	659.083	37	15.5785
XM_758317.1	672	360.927	102	78.4234
XM_758318.1	1134	862.537	168	54.05
XM_758319.1	1377	1120.6	140	34.6689
XM_758320.1	4275	3664.85	1861	140.914
XM_758321.1	3134	2702.98	458	47.0205
XM_758322.1	4143	3574.07	1633	126.791
XM_758323.1	819	656.361	233	98.5094
XM_758324.1	2463	2156.76	989	127.25
XM_758325.1	1022	789.777	281	98.7339
XM_758326.1	2142	1559.8	10	1.77908
XM_758327.1	549	447.685	11.4901	7.12222
XM_758328.1	822	610.163	179	81.4089
XM_758329.1	1791	1758.02	388	61.2452
XM_758330.1	3447	2925.04	752	71.3428
XM_758331.1	507	289.455	131	125.59
XM_758332.1	2040	2126.31	908	118.501
XM_758333.1	2760	2853.92	733	71.2733
XM_758334.1	822	631.869	546	239.789
XM_758335.1	1241	893.183	341	105.944
XM_758336.1	2601	2148.52	332	42.8807
XM_758337.1	651	432.059	94	60.3739
XM_758338.1	1473	1177.44	347	81.7817
XM_758339.1	462	255.835	107	116.062
XM_758340.1	465	284.771	137	133.502
XM_758341.1	1542	1211.58	224	51.305
XM_758342.1	561	377.235	316	232.455
XM_758343.1	2757	2323.51	1245	148.693
XM_758344.1	1149	924.138	62	18.6174
XM_758345.1	285	123.704	183	410.516
XM_758346.1	846	586.003	76	35.9897
XM_758347.1	1815	1757.61	9362	1478.13
XM_758348.1	889	632.094	290	127.315
XM_758349.1	1389	1291.12	732	157.329
XM_758350.1	684	454.183	87	53.156
XM_758351.1	1875	1503.11	448	82.7089
XM_758352.1	1288	1013.66	377	103.208
XM_758353.1	408	224.498	220	271.94
XM_758354.1	861	719.635	501	193.192
XM_758355.1	390	188.931	325	477.359
XM_758356.1	552	299.185	150	139.128
XM_758357.1	1176	776.932	153	54.6478
XM_758358.1	522	367.756	218	164.498
XM_758359.1	1077	877.697	324	102.439
XM_758360.1	1701	1361.96	513	104.525
XM_758361.1	849	629.238	383	168.907
XM_758362.1	351	185.778	3	4.48118
XM_758363.1	1749	1683.67	767	126.416
XM_758364.1	273	112.943	148	363.635
XM_758365.1	2382	2425.16	1971	225.533
XM_758366.1	2151	1484.61	327	61.1224
XM_758367.1	216	65.7991	337	1421.26
XM_758368.1	1402	1649.6	1698	285.643
XM_758369.1	714	602.632	612	281.815
XM_758370.1	1398	1283.09	709	153.34
XM_758371.1	516	356.006	171	133.292
XM_758372.1	869	709.057	892	349.099
XM_758373.1	690	557.537	725	360.851
XM_758374.1	989	781.533	1470	521.957
XM_758375.1	444	324.516	707	604.571
XM_758376.1	480	263.821	105	110.445
XM_758377.1	3249	3135.81	495	43.8046
XM_758378.1	3345	3215.14	563	48.593
XM_758379.1	1056	907.507	358	109.471
XM_758380.1	636	476.144	558	325.207
XM_758381.1	501	321.857	484	417.298
XM_758382.1	1161	913.847	222	67.413
XM_758383.1	939	649.068	111	47.4567
XM_758384.1	354	168.769	120	197.312
XM_758385.1	1215	1086.48	313	79.9442
XM_758386.1	972	792.885	27	9.4497
XM_758387.1	3027	3165.81	1596	139.898
XM_758388.1	1575	929.495	167.297	49.9465
XM_758389.1	1578	922.373	215.558	64.852
XM_758390.1	672	379.448	319	233.294
XM_758391.1	1575	916.884	306.866	92.8751
XM_758392.1	1566	922.762	410.037	123.31
XM_758393.1	1386	1169.8	1155	273.991
XM_758394.1	1575	911.91	229.03	69.6956
XM_758395.1	1569	939.444	111.182	32.8418
XM_758396.1	1578	922.419	63.0293	18.9618
XM_758397.1	933	754.97	7	2.57296
XM_758398.1	547	386.532	186	133.534
XM_758399.1	2421	2328.38	587	69.9598
XM_758400.1	5691	5013.91	1695	93.8119
XM_758401.1	3750	3582.21	1751	135.644
XM_758402.1	987	692.839	697	279.167
XM_758403.1	436	293.395	1427	1349.7
XM_758404.1	1978	1832.53	943	142.799
XM_758405.1	1970	1484.48	464.822	86.8915
XM_758406.1	378	212.016	138	180.624
XM_758407.1	276	115.645	413	991.029
XM_758408.1	1365	1401.5	1088	215.427
XM_758409.1	1380	1367.19	1224	248.437
XM_758410.1	840	647.833	376	161.06
XM_758411.1	699	544.297	3	1.5295
XM_758412.1	2276	2580.24	2168	233.165
XM_758413.1	4218	4844.9	3464	198.407
XM_758414.1	5091	5182.28	2149	115.075
XM_758415.1	1411	1358.33	583	119.104
XM_758416.1	642	435.73	1	0.636864
XM_758417.1	1035	974.707	349	99.361
XM_758418.1	3090	2942.73	897	84.5875
XM_758419.1	2157	1866.3	5	0.74345
XM_758420.1	381	220.642	90	113.193
XM_758421.1	1072	831.478	552	184.227
XM_758422.1	417	278.778	812	808.281
XM_758423.1	1815	1754.13	1169	184.934
XM_758424.1	777	576.147	453	218.187
XM_758425.1	2865	3016.11	1648	151.626
XM_758426.1	2376	2218.87	1000	125.064
XM_758427.1	5214	4466.76	915	56.8451
XM_758428.1	1875	1921.75	2420	349.448
XM_758429.1	3189	3242.58	3298	282.244
XM_758430.1	731	502.234	297.535	164.398
XM_758431.1	1184	1046.44	538.465	142.794
XM_758432.1	2808	2133.15	544	70.7689
XM_758433.1	1614	1471.35	365	68.8399
XM_758434.1	570	458.79	5	3.02427
XM_758435.1	1038	831.701	283	94.4242
XM_758436.1	876	575.728	258	124.356
XM_758437.1	1566	1331.93	559	116.464
XM_758438.1	410	198.971	227	316.592
XM_758439.1	615	400.435	60	41.5799
XM_758440.1	842	626.887	237	104.912
XM_758441.1	913	794.217	565	197.412
XM_758442.1	1818	1388.3	474	94.7458
XM_758443.1	456	238.52	67	77.9496
XM_758444.1	81	16.2338	72	1230.77
XM_758445.1	1095	889.476	212	66.1403
XM_758446.1	2714	2518.52	864	95.1989
XM_758447.1	1215	1110.68	396	98.9394
XM_758448.1	1130	878.912	960	303.103
XM_758449.1	486	375.798	154	113.718
XM_758450.1	1361	1233.65	1027	231.016
XM_758451.1	426	268.504	219	226.339
XM_758452.1	2274	1824.67	874	132.921
XM_758453.1	2678	2362.08	726	85.2915
XM_758454.1	3219	2665.67	235	24.4639
XM_758455.1	549	505.912	13.5099	7.41041
XM_758456.1	1359	1132.47	1051	257.538
XM_758457.1	348	186.636	185	275.068
XM_758458.1	717	509.828	238	129.544
XM_758459.1	1188	903.141	204	62.6814
XM_758460.1	732	413.879	45	30.1719
XM_758461.1	2358	2180.24	73	9.29145
XM_758462.1	465	313.899	410	362.459
XM_758463.1	2697	2986.46	4303	399.833
XM_758464.1	1725	1606.5	1033	178.436
XM_758465.1	468	298.234	207	192.61
XM_758466.1	522	378.139	219	160.715
XM_758467.1	2685	2976.11	2654	247.467
XM_758468.1	369	263.349	347	365.647
XM_758469.1	3183	3442.45	446	35.9527
XM_758470.1	1473	1277.59	178	38.6629
XM_758471.1	1470	1412.31	1592	312.808
XM_758472.1	1284	1204.83	887	204.297
XM_758473.1	3633	3582.36	622	48.1821
XM_758474.1	1632	1706	569	92.5544
XM_758475.1	483	376.019	498	367.522
XM_758476.1	1494	1489.36	132	24.5946
XM_758477.1	525	382.991	414	299.969
XM_758478.1	1638	1803.09	4795	737.964
XM_758479.1	1624	1748.19	1240	196.833
XM_758480.1	1542	1414.77	313	61.3934
XM_758481.1	1911	1864.69	316	47.0267
XM_758482.1	1023	799.021	624	216.716
XM_758483.1	912	767.894	63	22.7669
XM_758484.1	2674	2431.49	6122	698.69
XM_758485.1	357	191.645	120	173.759
XM_758486.1	798	417.63	178	118.275
XM_758487.1	2208	1674.11	908	150.51
XM_758488.1	2436	1629.08	337	57.4053
XM_758489.1	1138	801.231	249	86.2395
XM_758490.1	4134	3322.01	430	35.9197
XM_758491.1	1974	1378.97	470	94.5818
XM_758492.1	1344	1026.66	215	58.1132
XM_758493.1	2682	2649.81	1232	129.021
XM_758494.1	975	710.015	571	223.168
XM_758495.1	2371	1888.03	1217	178.873
XM_758496.1	1785	1474.6	295	55.5152
XM_758497.1	1689	1619.26	34.6046	5.93037
XM_758498.1	1536	1425.14	51.3954	10.0076
XM_758499.1	579	371.728	406	303.086
XM_758500.1	3656	2853.45	2980	289.808
XM_758501.1	305	141.952	299	584.514
XM_758502.1	1950	1451.1	886	169.435
XM_758503.1	306	142.894	114	221.389
XM_758504.1	1638	1471.2	1836	346.311
XM_758505.1	285	123.704	98	219.839
XM_758506.1	1883	1366.83	776	157.547
XM_758507.1	1650	1345.38	49	10.1068
XM_758508.1	2862	2416.87	852	97.8251
XM_758509.1	465	258.163	421	452.535
XM_758510.1	973	687.155	956	386.072
XM_758511.1	1548	1362.72	1362	277.355
XM_758512.1	678	544.993	1540	784.142
XM_758513.1	1074	886.175	1296	405.835
XM_758514.1	1380	1267.01	454	99.4354
XM_758515.1	1374	1251.84	314	69.6056
XM_758516.1	924	621.594	53	23.661
XM_758517.1	918	595.414	117	54.5295
XM_758518.1	744	451.435	123	75.6091
XM_758519.1	372	196.965	39	54.9465
XM_758520.1	513	287.705	218	210.268
XM_758521.1	1209	896.972	149	46.0969
XM_758522.1	1693	1469.98	1761	332.44
XM_758523.1	423	284.157	33	32.2271
XM_758524.1	411	281.542	43	42.3828
XM_758525.1	4743	3509.02	2089	165.203
XM_758526.1	5367	4171.19	4206	279.817
XM_758527.1	876	659.826	1443	606.878
XM_758528.1	1420	1243.29	2995	668.48
XM_758529.1	1330	1122.82	1612	398.401
XM_758530.1	897	555.684	138	68.9153
XM_758531.1	582	307.224	137	123.746
XM_758532.1	4530	3728.45	180	13.397
XM_758533.1	1419	1209.41	529	121.38
XM_758534.1	372	209.529	201	266.205
XM_758535.1	405	224.843	17	20.9814
XM_758536.1	1104	810.823	304	104.043
XM_758537.1	915	810.946	4367	1494.36
XM_758538.1	461	276.365	766	769.148
XM_758539.1	448	262.808	1147	1211.13
XM_758540.1	441	248.308	286	319.624
XM_758541.1	492	275.546	237	238.681
XM_758542.1	1500	1053.9	1070	281.739
XM_758543.1	3471	2866.35	1091	105.623
XM_758544.1	504	330.076	662	556.555
XM_758545.1	770	577.933	531	254.965
XM_758546.1	423	211.429	314	412.125
XM_758547.1	1968	1864.5	913	135.886
XM_758548.1	2487	2010.9	1171	161.596
XM_758549.1	1347	936.124	69.6641	20.651
XM_758550.1	1410	1026.56	299.946	81.0813
XM_758551.1	1680	1321.71	81.9378	17.2033
XM_758552.1	1437	1102.27	53.1238	13.3741
XM_758553.1	621	339.687	30.334	24.7808
XM_758554.1	1320	1087.42	67	17.0979
XM_758555.1	1884	1582.61	109	19.1125
XM_758556.1	1740	1422.63	31	6.04692
XM_758557.1	1527	1266.02	488	106.966
XM_758558.1	1356	978.428	342	96.9978
XM_758559.1	1194	836.259	49	16.26
XM_758560.1	1146	772.28	61	21.9189
XM_758561.1	1310	950.034	36	10.5154
XM_758562.1	1857	1372.09	243	49.1461
XM_758563.1	4542	3609.47	716.867	55.1137
XM_758564.1	3300	2291.19	176	21.3165
XM_758565.1	2010	1483.12	448	83.8238
XM_758566.1	900	559.269	57	28.2825
XM_758567.1	726	442.036	593	372.273
XM_758568.1	1689	1185.02	255	59.7143
XM_758569.1	2910	2446.49	852	96.6409
XM_758570.1	1689	1175.18	46	10.8622
XM_758571.1	2106	1727.39	390	62.6524
XM_758572.1	2967	2154.93	712	91.6877
XM_758573.1	1191	998.608	747	207.582
XM_758574.1	711	477.057	259	150.658
XM_758575.1	1305	1070.57	193	50.0271
XM_758576.1	753	536.971	274	141.6
XM_758577.1	1199	1110.43	461	115.205
XM_758578.1	955	781.576	1645	584.062
XM_758579.1	382	215.93	123	158.072
XM_758580.1	763	466.855	118	70.1397
XM_758581.1	2301	2062.99	692	93.0836
XM_758582.1	731	482.133	250	143.892
XM_758583.1	828	542.091	179	91.6317
XM_758584.1	1084	740.342	156	58.4732
XM_758585.1	648	461.812	216	129.794
XM_758586.1	3258	2823.1	988	97.1169
XM_758587.1	741	488.079	264	150.099
XM_758588.1	761	533.496	245	127.438
XM_758590.1	1374	1165.1	1053	250.801
XM_758591.1	534	323.807	188	161.115
XM_758592.1	534	349.41	2215	1759.15
XM_758593.1	1443	1390.15	13656	2726
XM_758594.1	650	371.47	92	68.7271
XM_758595.1	459	302.174	37	33.9788
XM_758596.1	1812	1277.22	281	61.0528
XM_758597.1	1206	1000.88	275	76.2457
XM_758598.1	282	120.982	91	208.73
XM_758599.1	2771	2406.57	1220	140.678
XM_758600.1	1386	1132.94	35	8.57288
XM_758601.1	672	465.217	921	549.374
XM_758602.1	602	345.295	190	152.696
XM_758603.1	735	486.589	184	104.935
XM_758604.1	603	417.332	160	106.391
XM_758605.1	1251	1030.17	452	121.757
XM_758606.1	1571	1114.48	627	156.12
XM_758607.1	1464	1026.18	280	75.7178
XM_758608.1	1971	1942.51	4018	573.998
XM_758609.1	3591	3023.2	893	81.9689
XM_758610.1	702	451.682	231	141.92
XM_758611.1	687	460.64	194	116.87
XM_758612.1	219	67.9909	85	346.922
XM_758613.1	465	320.617	1598	1383.1
XM_758614.1	2895	2567.08	932	100.749
XM_758615.1	1140	936.043	463	137.262
XM_758616.1	858	697.328	410	163.159
XM_758617.1	2183	1927.61	916	131.869
XM_758618.1	447	254.264	826	901.486
XM_758619.1	168	34.0733	51	415.356
XM_758620.1	1104	990.286	472	132.265
XM_758621.1	1237	948.363	572	167.373
XM_758622.1	2358	1968.2	765	107.859
XM_758623.1	2808	2552.75	1102	119.795
XM_758624.1	624	489.925	506	286.606
XM_758625.1	786	628.955	204	90.0067
XM_758626.1	2172	1801.74	2	0.308036
XM_758627.1	597	420.846	4	2.63755
XM_758628.1	651	458.891	5	3.0236
XM_758629.1	1071	832.788	8	2.66575
XM_758630.1	2538	2337.9	1529	181.487
XM_758631.1	1695	1622.31	1780	304.474
XM_758632.1	753	617.89	934	419.469
XM_758633.1	1107	906.198	1453	444.945
XM_758634.1	330	165.619	122	204.416
XM_758635.1	1344	1417.39	2357	461.459
XM_758636.1	399	249.965	777	862.593
XM_758637.1	669	543.318	6	3.06452
XM_758638.1	867	680.466	4	1.63124
XM_758639.1	924	802.036	8	2.76796
XM_758640.1	807	513.903	26	14.0397
XM_758641.1	867	627.025	129	57.0912
XM_758642.1	822	686.366	38	15.3636
XM_758643.1	1080	899.747	5	1.54211
XM_758644.1	729	523.819	12	6.35718
XM_758645.1	855	695.565	3	1.19687
XM_758646.1	447	273.737	16	16.22
XM_758647.1	1329	1482.38	846	158.371
XM_758648.1	2187	2020.72	528	72.5089
XM_758649.1	880	629.462	451	198.825
XM_758650.1	468	330.611	477	400.374
XM_758651.1	357	229.783	201	242.741
XM_758652.1	504	409.602	989	670.037
XM_758653.1	1191	971.686	843	240.75
XM_758654.1	1455	1174.22	793	187.408
XM_758655.1	982	729.051	586.781	223.349
XM_758656.1	597	453.546	121	74.0336
XM_758657.1	711	527.422	60	31.5688
XM_758658.1	1197	1103.97	48	12.0656
XM_758659.1	1113	999.993	315.219	87.4741
XM_758660.1	1021	791.246	288	101.006
XM_758661.1	1065	881.146	1338	421.379
XM_758662.1	1185	1069.27	1331	345.425
XM_758663.1	345	202.107	396	543.723
XM_758664.1	1386	1452.66	88	16.8107
XM_758665.1	213	63.6068	4	17.451
XM_758666.1	1434	1413.28	1921	377.192
XM_758667.1	894	778.771	1778	633.558
XM_758668.1	1827	1397.02	9	1.78773
XM_758669.1	1991	1591.35	644.979	112.472
XM_758670.1	1764	1382.97	25	5.01641
XM_758671.1	1383	1163.48	2053	489.658
XM_758672.1	534	322.819	98	84.2425
XM_758673.1	444	265.876	76	79.323
XM_758674.1	357	171.475	92	148.885
XM_758675.1	510	273.735	103	104.417
XM_758676.1	924	676.281	133	54.5744
XM_758677.1	1128	828.377	7	2.34496
XM_758678.1	702	471.998	2	1.17586
XM_758679.1	1578	1334.11	478	99.4262
XM_758680.1	1242	985.477	396	111.51
XM_758681.1	1536	1278.93	555	120.424
XM_758682.1	6273	5686.31	1121	54.7066
XM_758683.1	1848	1445.82	572	109.786
XM_758684.1	481	301.933	1493	1372.19
XM_758685.1	453	241.729	112	128.574
XM_758686.1	1113	798.229	126	43.8034
XM_758687.1	3915	3936.7	6.78046	0.477959
XM_758688.1	930	570.754	125	60.775
XM_758689.1	1653	1371.22	402	81.355
XM_758690.1	1001	684.043	113	45.8416
XM_758691.1	1131	713.391	371	144.315
XM_758692.1	564	470.465	108	63.7032
XM_758693.1	987	732.379	395	149.667
XM_758694.1	1296	1024.45	578	156.567
XM_758695.1	7311	5158.35	2118	113.941
XM_758696.1	542	290.384	173	165.325
XM_758697.1	477	314.803	29	25.5637
XM_758698.1	1209	935.375	282	83.6619
XM_758699.1	1518	1103.08	136	34.2135
XM_758700.1	1701	1248.96	312	69.3221
XM_758701.1	1617	1267.76	1108	242.531
XM_758702.1	260	101.496	209	571.426
XM_758703.1	557	308.845	293	263.264
XM_758704.1	351	177.511	893	1396.01
XM_758705.1	627	421.988	180	118.369
XM_758706.1	1545	1283.15	249	53.8501
XM_758707.1	2127	1794.1	1339	207.109
XM_758708.1	3087	2649.84	1595	167.034
XM_758709.1	873	617.89	54	24.252
XM_758710.1	726	490.585	53	29.9796
XM_758711.1	1235	821.441	210	70.9426
XM_758712.1	1041	707.638	18	7.05872
XM_758713.1	973	581.503	299	142.687
XM_758714.1	2739	2365.96	304	35.6559
XM_758715.1	1314	1087.59	464	118.391
XM_758716.1	2958	2559.25	2191	237.572
XM_758717.1	3561	3641.59	2901	221.066
XM_758718.1	720	402.497	256	176.499
XM_758719.1	999	618.987	269	120.597
XM_758720.1	1440	1229.36	2	0.451456
XM_758721.1	1095	874	1686	535.316
XM_758722.1	237	82.0534	238	804.906
XM_758723.1	204	57.0026	67	326.17
XM_758724.1	3696	3534.71	1609	126.318
XM_758725.1	1905	1524.94	129	23.4748
XM_758726.1	1791	1326.19	155	32.4334
XM_758727.1	2427	1576.84	495	87.1127
XM_758728.1	750	546.005	92	46.758
XM_758729.1	1158	1121.01	554	137.14
XM_758730.1	600	362.436	84	64.315
XM_758731.1	776	480.011	141	81.5141
XM_758732.1	225	72.6352	27	103.153
XM_758733.1	846	603.395	50	22.995
XM_758734.1	333	168.434	34	56.0163
XM_758735.1	1068	786.568	161	56.8007
XM_758736.1	1077	945.807	491	144.06
XM_758737.1	783	596.739	290	134.858
XM_758738.1	1395	1346.56	428	88.2029
XM_758739.1	522	289.961	112	107.187
XM_758740.1	567	317.949	37	32.2931
XM_758741.1	858	724.76	16	6.12618
XM_758742.1	594	386.421	183	131.418
XM_758743.1	989	780.86	535	190.128
XM_758744.1	704	487.599	95	54.0662
XM_758745.1	351	185.778	110	164.31
XM_758746.1	1413	1177.27	405	95.4645
XM_758747.1	1881	1654.55	249	41.7622
XM_758748.1	2108	1628.29	239	40.7314
XM_758749.1	591	369.914	92	69.0163
XM_758750.1	306	142.894	128	248.577
XM_758751.1	4308	4196.6	237	15.6717
XM_758752.1	1155	841.892	249	82.0743
XM_758753.1	3741	3356.56	86	7.10999
XM_758754.1	813	629.716	29	12.7796
XM_758755.1	2773	2356.86	901	106.085
XM_758756.1	4116	3217.89	1518	130.908
XM_758757.1	846	651.588	357	152.041
XM_758758.1	3264	2987.75	2453	227.833
XM_758759.1	431	234.85	580	685.334
XM_758760.1	2916	2647.82	2474	259.284
XM_758761.1	2046	2394.21	2216	256.845
XM_758762.1	1305	966.324	773	221.984
XM_758763.1	549	343.496	1	0.807873
XM_758764.1	1401	1245.35	354	78.882
XM_758765.1	147	23.6512	57	668.783
XM_758766.1	1299	988.309	627	176.051
XM_758767.1	488	299.628	227	210.236
XM_758768.1	2382	1744.51	414	65.8552
XM_758769.1	5148	4751.67	1102	64.3575
XM_758770.1	2766	2560.35	104	11.2719
XM_758771.1	1479	1300.09	563	120.171
XM_758772.1	1046	1052.63	1824	480.852
XM_758773.1	3429	2930.46	131	12.4051
XM_758774.1	2655	2129.27	382	49.7849
XM_758775.1	1008	918.426	463	139.895
XM_758776.1	1089	887.805	232	72.5162
XM_758777.1	597	422.401	308	202.344
XM_758778.1	938	712.833	600	233.576
XM_758779.1	634	443.83	135	84.4075
XM_758780.1	348	177.772	826	1289.38
XM_758781.1	1222	1142.99	1523	369.763
XM_758782.1	984	727.432	105	40.0554
XM_758783.1	4290	4707.19	2463	145.2
XM_758784.1	1164	981.282	540	152.709
XM_758785.1	1087	831.364	523	174.572
XM_758786.1	1494	1477.96	691	129.741
XM_758787.1	2451	2413.35	245	28.1715
XM_758788.1	2202	1942.06	25	3.57225
XM_758789.1	2592	2228.04	1	0.124549
XM_758790.1	1698	1509.42	1281	235.507
XM_758791.1	1035	973.821	531	151.314
XM_758792.1	627	472.645	396	232.501
XM_758793.1	2067	1941.26	1420	202.987
XM_758794.1	1950	1446.42	826.585	158.583
XM_758795.1	1407	1271.41	546	119.172
XM_758796.1	663	469.751	45	26.5833
XM_758797.1	2070	1797.19	656	101.292
XM_758798.1	1515	1479.96	531	99.5656
XM_758799.1	1031	828.97	823.695	275.735
XM_758800.1	2916	2751.77	2339.31	235.906
XM_758801.1	414	224.804	141	174.053
XM_758802.1	2898	2820.91	1368	134.574
XM_758803.1	1149	850.526	638	208.16
XM_758804.1	276	115.645	14	33.5942
XM_758805.1	2748	3011.62	3353	308.957
XM_758806.1	1668	1767.33	858	134.721
XM_758807.1	2235	2212.6	586	73.4951
XM_758808.1	763	485.308	958	547.787
XM_758809.1	1020	939.861	202	59.642
XM_758810.1	2419	2405.96	3199	368.969
XM_758811.1	714	669.693	142	58.8406
XM_758812.1	1686	1919.43	1299	187.802
XM_758813.1	726	575.481	175	84.3862
XM_758814.1	1599	1442.18	286	55.0315
XM_758815.1	1065	1116.68	174	43.2398
XM_758816.1	393	189.202	50	73.3346
XM_758817.1	7218	6410.17	524	22.6843
XM_758818.1	852	648.89	84	35.923
XM_758819.1	606	437.943	1030	652.655
XM_758820.1	846	512.74	160.975	87.1217
XM_758821.1	882	539.733	178.025	91.5304
XM_758822.1	3394	2676.85	481	49.8639
XM_758823.1	306	142.894	214	415.59
XM_758824.1	686	447.316	1157	717.767
XM_758825.1	621	465.148	72	42.9542
XM_758826.1	1290	1030.22	453	122.02
XM_758827.1	1432	1294.62	617	132.254
XM_758828.1	1110	798.351	166	57.7004
XM_758829.1	3606	3074.07	882	79.6194
XM_758830.1	1112	1074.52	4015	1036.9
XM_758831.1	720	506.591	742	406.453
XM_758832.1	1294	1098.98	520	131.304
XM_758833.1	717	733.184	785	297.112
XM_758834.1	1173	915.245	883	267.724
XM_758835.1	1281	1110.13	337	84.2404
XM_758836.1	1269	1019.59	190	51.712
XM_758837.1	2343	2452.33	2618	296.248
XM_758838.1	117	14.658	81	1533.47
XM_758839.1	2784	2530.95	1390	152.404
XM_758840.1	330	165.619	142	237.927
XM_758841.1	537	347.457	192	153.343
XM_758842.1	1398	1164.31	331	78.8904
XM_758843.1	522	315.578	242	212.801
XM_758844.1	1419	1152.38	661	159.173
XM_758845.1	557	377.111	784	576.915
XM_758846.1	168	34.0733	167	1360.09
XM_758847.1	2796	2623.39	334	35.3303
XM_758848.1	1659	1670.32	255	42.3649
XM_758849.1	1062	763.109	646	234.915
XM_758850.1	587	385.893	377	271.106
XM_758851.1	763	535.784	1693	876.863
XM_758852.1	1377	1008.16	174	47.8943
XM_758853.1	2565	2418.23	1551	177.983
XM_758854.1	423	240.2	217	250.698
XM_758855.1	879	804.032	646	222.958
XM_758856.1	717	561.932	6	2.963
XM_758857.1	667	536.899	532	274.969
XM_758858.1	2328	2139.59	11967	1552.1
XM_758859.1	719	602.643	703	323.713
XM_758860.1	1074	993.17	573	160.101
XM_758861.1	783	650.874	281	119.805
XM_758862.1	378	215.161	170	219.255
XM_758863.1	411	263.796	62477	65722.8
XM_758864.1	384	211.634	42862	56201.9
XM_758865.1	2649	2357.44	792	93.2286
XM_758866.1	795	630.229	413	181.851
XM_758867.1	1164	1024.25	286	77.4866
XM_758868.1	861	732.863	69	26.1271
XM_758869.1	1524	1231.19	12	2.7047
XM_758870.1	2439	2006.67	11	1.52118
XM_758871.1	1431	1146.33	498	120.555
XM_758872.1	1914	1443.47	440	84.588
XM_758873.1	363	197.508	96	134.881
XM_758874.1	480	300.106	224	207.128
XM_758875.1	765	525.052	314	165.956
XM_758876.1	3708	3548.85	977	76.3962
XM_758877.1	1326	1060.18	3	0.78525
XM_758878.1	294	131.931	6	12.6203
XM_758879.1	1497	1193.04	9	2.0934
XM_758880.1	758	519.089	150	80.1888
XM_758881.1	1935	1614.55	34	5.84376
XM_758882.1	3573	3720.02	1503	112.119
XM_758883.1	922	711.325	1270	495.451
XM_758884.1	960	815.253	369	125.602
XM_758885.1	1650	1645.38	511	86.1825
XM_758886.1	3672	2988	835	77.5478
XM_758887.1	1449	1157.98	808	193.631
XM_758888.1	768	513.144	65	35.1511
XM_758889.1	368	201.888	224	307.894
XM_758890.1	1815	1595.96	500	86.9387
XM_758891.1	732	417.706	5	3.32172
XM_758892.1	553	325.536	254	216.521
XM_758893.1	744	548.763	221	111.756
XM_758894.1	2151	1735.05	44	7.03729
XM_758895.1	1992	1492.79	315	58.5565
XM_758896.1	6399	5081.88	645	35.2208
XM_758897.1	1314	883.957	187	58.705
XM_758898.1	780	544.93	179	91.1542
XM_758899.1	1572	1447.15	769	147.461
XM_758900.1	1049	770.555	389	140.091
XM_758901.1	3331	2748.32	774	78.1516
XM_758902.1	1227	1116.7	193	47.9608
XM_758903.1	1011	834.089	258	85.8365
XM_758904.1	1737	1530.6	198	35.8979
XM_758905.1	3372	3781.57	4352	319.36
XM_758906.1	3210	2767.65	814	81.6164
XM_758907.1	2304	1861.13	469	69.9296
XM_758908.1	831	728.212	502	191.298
XM_758909.1	1284	1115.69	498	123.865
XM_758910.1	948	845.092	406	133.317
XM_758911.1	2877	2654.19	702	73.3955
XM_758912.1	5181	4507.3	1407	86.6248
XM_758913.1	618	429.119	114	73.7211
XM_758914.1	1800	1555.81	493	87.9336
XM_758915.1	1689	1635.18	750	127.28
XM_758916.1	1118	908.318	877	267.933
XM_758917.1	921	818.302	114	38.6594
XM_758918.1	870	687.712	328	132.352
XM_758919.1	3678	3006.05	1080	99.6993
XM_758921.1	585	289.849	87	83.2937
XM_758922.1	1044	900.177	530	163.385
XM_758923.1	1357	969.438	474	135.682
XM_758924.1	1467	1206.86	656	150.838
XM_758925.1	1185	1375.56	10661	2150.72
XM_758926.1	1191	1157.27	1614	387.018
XM_758927.1	780	687.496	423	170.74
XM_758928.1	771	582.178	132	62.9191
XM_758929.1	684	512.571	1285	695.686
XM_758930.1	3522	2745.72	154	15.5643
XM_758931.1	1890	1645.59	1177	198.481
XM_758932.1	519	305.6	28	25.4255
XM_758933.1	537	345.737	93	74.6452
XM_758934.1	372	174.478	61	97.0184
XM_758935.1	738	690.73	917	368.405
XM_758936.1	524	277.213	898	898.934
XM_758937.1	1263	1018.78	702	191.215
XM_758938.1	1567	1363.77	864	175.807
XM_758939.1	1131	953.438	414	120.496
XM_758940.1	3957	3522.57	1525	120.136
XM_758941.1	1074	928.091	41	12.2591
XM_758942.1	2184	1949.54	701	99.7817
XM_758943.1	465	263.079	102	107.591
XM_758944.1	2025	1981.49	856	119.88
XM_758945.1	829	608.844	212	96.626
XM_758946.1	428	248.996	47344	52764
XM_758947.1	2157	2044.54	561	76.1434
XM_758948.1	904	658.943	475	200.037
XM_758949.1	1440	1055.07	4	1.05207
XM_758950.1	699	472.288	1	0.587568
XM_758951.1	3741	3574.5	1583	122.894
XM_758952.1	1683	1452.16	1427	272.693
XM_758953.1	237	82.0534	46	155.57
XM_758954.1	678	526.968	125	65.8249
XM_758955.1	708	606.063	367	168.04
XM_758956.1	2307	2186.85	659	83.624
XM_758957.1	873	728.01	411	156.664
XM_758958.1	1503	1346.85	947	195.116
XM_758959.1	1905	1787.91	80	12.4168
XM_758960.1	225	72.6352	9	34.3843
XM_758961.1	444	239.988	42	48.565
XM_758962.1	1671	1408.18	35	6.89725
XM_758963.1	844	785.758	1261	445.339
XM_758964.1	390	192.506	128	184.514
XM_758965.1	2397	2736.68	345	34.9831
XM_758966.1	3123	3142.48	2635	232.687
XM_758967.1	1308	1180.09	32	7.52488
XM_758968.1	2706	2521.85	3469	381.724
XM_758969.1	2634	2246.97	213	26.3055
XM_758970.1	1239	1320.96	194	40.7546
XM_758971.1	354	188.702	33	48.529
XM_758972.1	537	298.946	154	142.953
XM_758973.1	1806	1422.09	586	114.35
XM_758974.1	1833	1473.67	449	84.5495
XM_758975.1	1398	903.48	222	68.1866
XM_758976.1	1149	1017.28	365	99.5672
XM_758977.1	5415	4874.27	830	47.2534
XM_758978.1	1320	1141.96	564	137.054
XM_758979.1	2775	2629.7	3788	399.732
XM_758980.1	1704	1372	104.361	21.1081
XM_758981.1	1781	1497.99	1779.64	329.676
XM_758982.1	2232	2000.57	1318	182.821
XM_758983.1	1476	1539.75	936	168.69
XM_758984.1	1404	1108.42	241	60.3363
XM_758985.1	1362	1145.9	503	121.811
XM_758986.1	906	677.014	525	215.192
XM_758987.1	960	722.839	3	1.15171
XM_758988.1	1044	834.429	3	0.997692
XM_758989.1	1036	777.572	352	125.622
XM_758990.1	2406	2122.64	202	26.4083
XM_758991.1	1206	941.859	108	31.8202
XM_758992.1	1026	678.051	84	34.3781
XM_758993.1	387	185.655	125	186.839
XM_758994.1	165	32.4168	108	924.522
XM_758995.1	978	733.32	506	191.479
XM_758996.1	3036	2989.78	914	84.8342
XM_758997.1	1671	1547.7	6	1.0758
XM_758998.1	879	805.603	42	14.4675
XM_758999.1	1378	1244.07	293	65.3563
XM_759000.1	2172	1600.39	237	41.0948
XM_759001.1	2055	2004.24	192	26.5837
XM_759002.1	1824	1783.04	361	56.1837
XM_759003.1	1385	1227.51	1234	278.968
XM_759004.1	1800	1526.74	840	152.679
XM_759005.1	2103	1817.95	1180	180.121
XM_759006.1	753	597.506	491	228.036
XM_759007.1	1224	1098.94	215	54.291
XM_759008.1	504	261.563	130	137.921
XM_759009.1	549	338.859	131	107.279
XM_759010.1	2430	1978.77	454	63.6684
XM_759011.1	345	173.871	131	209.078
XM_759012.1	2127	1579.26	354	62.2036
XM_759013.1	279	118.354	100	234.467
XM_759014.1	2604	2268.27	220	26.9148
XM_759015.1	3663	3003.07	443	40.9357
XM_759016.1	1984	1580.22	644	113.092
XM_759017.1	1238	983.633	293	82.6606
XM_759018.1	150	24.9942	82	910.413
XM_759019.1	2350	2033.01	1116	152.331
XM_759020.1	3327	2943.17	364	34.3203
XM_759021.1	546	295.479	2	1.87831
XM_759022.1	444	213.353	1	1.30066
XM_759023.1	464	248.786	685	764.062
XM_759024.1	1838	1502.19	495	91.4415
XM_759025.1	3087	2499.09	405	44.9716
XM_759026.1	1734	1749.57	1835	291.05
XM_759027.1	2907	2609.26	943	100.29
XM_759028.1	552	298.912	30	27.8511
XM_759029.1	1308	1058.48	1049	275.015
XM_759030.1	558	373.893	68	50.4691
XM_759031.1	261	102.367	33	89.4576
XM_759032.1	315	151.37	33	60.4975
XM_759033.1	633	424.337	128	83.7073
XM_759034.1	1311	1220.49	1817	413.129
XM_759035.1	916	674.365	1172	482.277
XM_759036.1	2043	1966.47	1079	152.264
XM_759037.1	1788	1298.61	415	88.6818
XM_759038.1	1548	1290.34	387	83.2281
XM_759039.1	1111	800.723	331	114.712
XM_759040.1	420	214.517	12	15.5233
XM_759041.1	603	418.342	16	10.6134
XM_759042.1	3279	2515.73	819	90.3407
XM_759043.1	3135	2708.24	360	36.8876
XM_759044.1	2293	1773.53	919	143.794
XM_759045.1	791	456.66	71	43.1449
XM_759046.1	1678	1377.62	795	160.141
XM_759047.1	225	72.6352	37	141.358
XM_759048.1	2433	1684.19	248	40.8624
XM_759049.1	4686	3711.62	1249	93.3821
XM_759050.1	1599	1281.75	326	70.5794
XM_759051.1	1032	731.596	418	158.551
XM_759052.1	1662	1446.23	628	120.5
XM_759053.1	531	232.727	53	63.1966
XM_759054.1	1137	754.587	103	37.8785
XM_759055.1	432	219.477	55	69.5407
XM_759056.1	1620	1410.71	1015	199.661
XM_759057.1	930	638.869	309	134.218
XM_759058.1	327	162.719	243	414.413
XM_759059.1	948	612.95	157	71.0786
XM_759060.1	3351	3020.63	969	89.0207
XM_759061.1	3324	2811.5	1307	129.003
XM_759062.1	2917	2471.55	1004	112.727
XM_759063.1	707	498.187	132	73.5269
XM_759064.1	2070	1702.03	945	154.074
XM_759065.1	5478	4100.9	1928	130.464
XM_759066.1	2355	1737.19	541	86.4201
XM_759067.1	1251	978.861	180	51.0289
XM_759068.1	966	808.441	903	309.959
XM_759069.1	1143	907.081	237	72.5048
XM_759070.1	2262	2001.19	452	62.678
XM_759071.1	327	162.719	102	173.951
XM_759072.1	2508	2230.7	982	122.162
XM_759073.1	249	91.979	56	168.952
XM_759074.1	621	408.2	200	135.963
XM_759075.1	774	532.939	233	121.323
XM_759076.1	475	195.891	58	82.1632
XM_759077.1	1083	942.01	79	23.2721
XM_759078.1	2910	2343.61	313	37.0616
XM_759079.1	1681	1254.68	762	168.534
XM_759080.1	936	758.468	388	141.958
XM_759081.1	243	86.9923	17	54.2291
XM_759082.1	1461	1312.22	600	126.885
XM_759083.1	3633	3329.48	1789	149.107
XM_759084.1	596	449.991	446	275.04
XM_759085.1	105	13.8369	51	1022.82
XM_759086.1	3003	2297	175	21.1418
XM_759087.1	630	409.93	203	137.42
XM_759088.1	828	508.588	264	144.046
XM_759089.1	309	145.703	104	198.075
XM_759090.1	1131	878.492	370	116.877
XM_759091.1	2082	1913.56	1619	234.785
XM_759092.1	1039	777.138	496	177.112
XM_759093.1	1335	1042.39	421	112.077
XM_759094.1	1103	733.955	266	100.572
XM_759095.1	871	652.807	209	88.8435
XM_759096.1	405	203.742	48	65.377
XM_759097.1	372	188.179	37	54.5626
XM_759098.1	2640	2139.86	379	49.1493
XM_759099.1	4851	4186.29	427	28.305
XM_759100.1	678	434.857	19	12.1247
XM_759101.1	323	158.931	36	62.8578
XM_759102.1	1098	944.143	691	203.098
XM_759103.1	1748	1466.49	1978	374.292
XM_759104.1	1908	1987.81	1738	242.628
XM_759105.1	1315	1217.71	2720	619.854
XM_759106.1	135	18.8481	23	338.63
XM_759107.1	534	420.808	75	49.4586
XM_759108.1	582	351.2	440	347.666
XM_759109.1	659	501.043	349	193.292
XM_759110.1	606	359.658	250	192.892
XM_759111.1	1351	1182.77	277	64.9896
XM_759112.1	303	140.124	209	413.902
XM_759113.1	2193	2368.37	560	65.6151
XM_759114.1	2463	2078.23	989	132.059
XM_759115.1	4149	4055.15	797	54.5401
XM_759116.1	2280	2196.96	1377	173.93
XM_759117.1	1272	1070.93	288	74.6266
XM_759118.1	1344	1117.72	415.197	103.083
XM_759119.1	1166	957.645	852.803	247.12
XM_759120.1	1860	1737.87	601	95.9672
XM_759121.1	812	512.907	185	100.092
XM_759122.1	1942	1887.16	2995	440.404
XM_759124.1	225	72.6352	2	7.64095
XM_759125.1	144	22.5275	4	49.2732
XM_759126.1	216	65.7991	3	12.6522
XM_759127.1	261	102.367	25	67.7709
XM_759128.1	1245	1097.99	334	84.414
XM_759129.1	1686	1567.5	757	134.015
XM_759130.1	2253	2275.08	4153	506.559
XM_759131.1	414	244.733	72	81.6401
XM_759132.1	3747	3115.27	13	1.15801
XM_759133.1	792	578.325	3	1.43951
XM_759134.1	3477	2946.1	1791	168.699
XM_759135.1	798	627.543	182	80.4809
XM_759136.1	2262	1690.97	648	106.342
XM_759137.1	5325	4556.52	1972	120.099
XM_759138.1	561	254.61	55	59.9449
XM_759139.1	273	112.943	61	149.877
XM_759140.1	996	751.666	3	1.10754
XM_759141.1	648	480.953	0	0
XM_759142.1	2253	1523.52	375	68.304
XM_759143.1	510	276.033	154	154.819
XM_759144.1	1230	935.975	25	7.41208
XM_759145.1	1169	761.239	298	108.633
XM_759146.1	939	643.355	308	132.851
XM_759147.1	1248	866.838	231	73.95
XM_759148.1	1182	923.991	121	36.3398
XM_759149.1	1662	1571.79	3800	670.893
XM_759150.1	1035	812.667	170	58.0498
XM_759151.1	2766	2466.85	858	96.5183
XM_759152.1	743	509.635	205.038	111.645
XM_759153.1	2192	1855.27	709.962	106.192
XM_759154.1	1350	1111.56	651	162.522
XM_759155.1	357	208.794	161	213.98
XM_759156.1	6081	6203.5	4759	212.884
XM_759157.1	822	706.118	206	80.957
XM_759158.1	529	316.535	1931	1692.87
XM_759159.1	823	536.151	488	252.579
XM_759160.1	755	557.438	324	161.292
XM_759161.1	1770	1517.4	651	119.054
XM_759162.1	1380	1251.85	2267	502.532
XM_759163.1	2517	2263.01	771	94.5437
XM_759164.1	1554	1385.84	777	155.587
XM_759165.1	739	537.538	168	86.729
XM_759166.1	983	698.999	320	127.039
XM_759167.1	318	154.216	40	71.9773
XM_759168.1	681	475.849	142	82.8101
XM_759169.1	1113	863.359	49	15.7496
XM_759170.1	1956	1526.9	79	14.3576
XM_759171.1	648	418.085	81	53.7631
XM_759172.1	1103	738.986	178	66.8418
XM_759173.1	1185	903.668	213	65.4087
XM_759174.1	3582	2937.78	490	46.2851
XM_759175.1	582	358.545	164	126.93
XM_759176.1	654	347.363	67	53.5249
XM_759177.1	462	261.673	230	243.912
XM_759178.1	574	325.001	170	145.154
XM_759179.1	1539	1095.42	370	93.7312
XM_759180.1	331	166.552	127	211.602
XM_759181.1	2277	1939.18	412	58.958
XM_759182.1	153	26.3326	82	864.14
XM_759183.1	975	855.298	743	241.066
XM_759184.1	1011	774.545	91	32.6031
XM_759185.1	1533	1380.21	376	75.5974
XM_759186.1	660	469.744	159	93.9292
XM_759187.1	2618	2361.57	2235	262.628
XM_759188.1	2742	2497.73	2286	253.978
XM_759189.1	2370	2161.28	763	97.9666
XM_759190.1	4854	4720.14	1071	62.965
XM_759191.1	1761	1559.74	716	127.387
XM_759192.1	903	625.295	503	223.227
XM_759193.1	1518	1070.91	899	232.954
XM_759194.1	400	283.35	132	129.275
XM_759195.1	2202	1774.73	266	41.5923
XM_759196.1	1555	1187.76	208	48.5958
XM_759197.1	1776	1185.34	18	4.214
XM_759198.1	1503	1226.72	546	123.513
XM_759199.1	1578	1281.27	45	9.7462
XM_759200.1	1515	1220.81	135	30.6868
XM_759201.1	2142	2006.35	574	79.3908
XM_759202.1	1289	1023.41	769	208.517
XM_759203.1	1031	945.575	501	147.03
XM_759204.1	1542	1452.17	616	117.714
XM_759205.1	966	772.163	1680	603.761
XM_759206.1	1305	1121.34	418	103.443
XM_759207.1	2865	2540.83	561	61.2706
XM_759208.1	11787	11151.4	4058	100.982
XM_759209.1	1709	1500.5	364	67.3178
XM_759210.1	1401	1180.39	108	25.39
XM_759211.1	1225	930.95	944	281.391
XM_759212.1	461	266.452	143	148.929
XM_759213.1	1233	1103.02	304	76.4809
XM_759214.1	732	493.222	260	146.283
XM_759215.1	1647	1207.42	1159	266.372
XM_759216.1	195	50.8167	13	70.9907
XM_759217.1	216	65.7991	26	109.652
XM_759218.1	312	148.538	22866	42718.5
XM_759219.1	780	519.168	144	76.9696
XM_759220.1	312	148.538	22866	42718.5
XM_759221.1	1542	1578.3	286	50.2854
XM_759222.1	576	340.543	225	183.348
XM_759223.1	920	860.102	1546	498.797
XM_759224.1	1058	791.898	487	170.657
XM_759225.1	2136	1499.54	488	90.308
XM_759226.1	1968	2141.21	4837	626.874
XM_759228.1	273	112.943	171	420.146
XM_759229.1	510	308.41	385	346.415
XM_759230.1	1176	969.587	361	103.32
XM_759231.1	1530	1283.32	462	99.9014
XM_759232.1	1026	825.109	503	169.169
XM_759233.1	951	852.697	2072	674.309
XM_759234.1	1137	1004.56	642	177.348
XM_759235.1	4137	4139.69	1076	72.1289
XM_759236.1	666	434.942	99	63.1638
XM_759237.1	168	34.0733	97	789.992
XM_759238.1	2442	2211.43	942	118.207
XM_759239.1	1665	1448.11	725	138.932
XM_759240.1	1788	1565.59	201	35.6274
XM_759241.1	375	202.019	134	184.068
XM_759242.1	773	516.807	286	153.568
XM_759243.1	1329	1375.73	5364	1081.98
XM_759244.1	672	438.329	14	8.86324
XM_759245.1	468	211.96	141	184.599
XM_759246.1	4446	3666.31	1089	82.4258
XM_759247.1	171	35.8118	17	131.731
XM_759248.1	750	513.049	62	33.5349
XM_759249.1	3738	3098.07	151	13.5254
XM_759250.1	2778	2128.08	22	2.86879
XM_759251.1	1050	733.651	19	7.18668
XM_759252.1	693	384.98	106	76.4067
XM_759253.1	594	379.766	208	151.989
XM_759254.1	474	311.021	765	682.553
XM_759255.1	438	294.373	95	89.5549
XM_759256.1	1377	1133.56	600	146.883
XM_759257.1	1992	2048.3	1301.43	176.316
XM_759258.1	639	434.856	35.5703	22.699
XM_759259.1	2835	2651.99	430	44.9946
XM_759260.1	489	315.278	309	271.975
XM_759261.1	1203	987.395	145	40.7513
XM_759262.1	1395	1417.06	1911	374.229
XM_759263.1	933	600.329	266	122.958
XM_759264.1	210	61.2776	54	244.543
XM_759265.1	270	110.339	66	165.988
XM_759266.1	1005	714.263	117	45.4561
XM_759267.1	432	257.339	140.627	151.644
XM_759268.1	1806	1627.99	761.373	129.78
XM_759269.1	1167	902.218	704	216.534
XM_759270.1	2417	1818.94	512	78.1118
XM_759271.1	858	620.019	228	102.046
XM_759272.1	657	421.806	114	74.9992
XM_759273.1	249	91.979	83	250.411
XM_759274.1	2811	2944.41	1589	149.758
XM_759275.1	1098	993.044	241	67.3461
XM_759276.1	1044	936.806	198	58.6516
XM_759277.1	1317	1056.73	338	88.7603
XM_759278.1	3078	3281.3	1056	89.3064
XM_759279.1	436	196.711	589	830.904
XM_759280.1	363	207.278	159	212.867
XM_759281.1	1983	1786.5	1288	200.068
XM_759282.1	2856	2784.47	3439	342.732
XM_759283.1	3033	3287.31	2412	203.611
XM_759284.1	969	843.969	235	77.2691
XM_759285.1	1943	1645.54	546	92.0764
XM_759287.1	827	617.147	115	51.7099
XM_759288.1	2412	1995.01	957	133.116
XM_759289.1	1200	932.402	191	56.8453
XM_759290.1	2007	1768.66	246	38.5971
XM_759291.1	861	893.874	1403	435.558
XM_759292.1	270	110.339	194	487.905
XM_759293.1	678	576.047	512	246.647
XM_759294.1	2193	1907.56	981	142.711
XM_759295.1	489	323.603	893	765.78
XM_759296.1	1221	919.432	188	56.7418
XM_759297.1	1071	659.054	127	53.4746
XM_759298.1	687	540.644	439	225.329
XM_759299.1	3921	3397.44	1285	104.958
XM_759300.1	918	557.202	97	48.3085
XM_759301.1	1311	980.385	250	70.7632
XM_759302.1	1203	1026.98	449	121.324
XM_759303.1	1488	1221.83	444	100.841
XM_759304.1	186	45.0646	55	338.682
XM_759305.1	1905	1695.51	1055	172.67
XM_759306.1	405	249.532	176	195.727
XM_759307.1	937	699.765	448	177.66
XM_759308.1	459	240.937	195	224.593
XM_759309.1	1956	2088.96	5785	768.489
XM_759310.1	1655	1532.7	672	121.668
XM_759311.1	240	84.524	458	1503.66
XM_759312.1	630	500.138	718	398.381
XM_759313.1	882	722.86	131	50.29
XM_759314.1	475	311.51	1127	1003.96
XM_759315.1	933	793.056	922	322.62
XM_759316.1	1721	1231.43	158	35.6052
XM_759317.1	1632	1314.34	537	113.379
XM_759318.1	2063	1932.62	555	79.6912
XM_759319.1	921	663.515	146	61.0613
XM_759320.1	1406	1050.71	635	167.709
XM_759321.1	1424	1398.12	923	183.198
XM_759322.1	801	525.169	252	133.157
XM_759323.1	1326	949.782	112	32.7234
XM_759324.1	1014	814.178	91	31.0161
XM_759325.1	495	233.025	1	1.19086
XM_759326.1	894	723.095	366	140.459
XM_759327.1	4638	4025.38	890	61.3547
XM_759328.1	2889	2632.35	560	59.035
XM_759329.1	1146	977.95	165	46.82
XM_759330.1	2289	2274.52	1857	226.562
XM_759331.1	1396	1183.23	263	61.6809
XM_759332.1	775	603.202	175	80.5082
XM_759333.1	1810	1647.91	4127	694.971
XM_759334.1	1569	1438.5	1432	276.248
XM_759335.1	534	314.162	133	117.48
XM_759336.1	636	484.429	356	203.931
XM_759337.1	720	520.496	358	190.867
XM_759338.1	1167	963.314	258	74.3218
XM_759339.1	882	772.013	740	265.994
XM_759340.1	3213	2985.57	149	13.8492
XM_759341.1	708	424.418	149	97.422
XM_759342.1	837	642.082	181	78.2262
XM_759343.1	642	491.914	322	181.648
XM_759344.1	2703	2440.79	474	53.8906
XM_759345.1	1053	768.394	275	99.3146
XM_759346.1	597	372.569	247	183.973
XM_759347.1	1451	1158.72	956	228.952
XM_759348.1	10767	9902.75	5613	157.291
XM_759349.1	528	388.528	402	287.123
XM_759350.1	978	768.051	391	141.27
XM_759351.1	2142	1634.49	749	127.164
XM_759352.1	1536	1150.22	488	117.734
XM_759353.1	1569	1315.14	474	100.016
XM_759354.1	1068	760.805	283	103.223
XM_759355.1	2988	2853.72	1338	130.11
XM_759356.1	603	434.191	251	160.419
XM_759357.1	4293	4057.03	1243	85.0211
XM_759358.1	2541	2233.42	947	117.664
XM_759359.1	405	262.909	82	86.5512
XM_759360.1	743	544.705	156	79.4744
XM_759361.1	525	358.041	358	277.469
XM_759362.1	1448	1441.78	528	101.625
XM_759363.1	1939	1882.74	1370	201.927
XM_759364.1	2379	2378.51	1136	132.537
XM_759365.1	1590	1598.01	498	86.4799
XM_759366.1	2229	2455	944	106.705
XM_759367.1	1262	1130.16	1114	273.533
XM_759368.1	966	736.419	525	197.833
XM_759369.1	3177	3083.78	553	49.763
XM_759370.1	604	500.644	231	128.04
XM_759371.1	765	672.21	830	342.64
XM_759372.1	929	823.979	667	224.633
XM_759373.1	977	846.277	522	171.168
XM_759374.1	543	276.11	68	68.3426
XM_759375.1	2826	2639.04	1464	153.943
XM_759376.1	540	447.053	367	227.809
XM_759377.1	444	257.496	296	318.997
XM_759378.1	1354	878.514	75	23.6906
XM_759379.1	2187	2058.25	1759	237.154
XM_759380.1	471	298.696	217	201.602
XM_759381.1	1599	1268.78	1328	290.453
XM_759382.1	1032	729.689	137	52.1011
XM_759383.1	477	310.052	0	0
XM_759384.1	348	182.834	0	0
XM_759385.1	243	86.9923	0	0
XM_759386.1	483	247.828	1	1.11973
XM_759387.1	1803	1419.16	201	39.3032
XM_759388.1	609	450.088	1240	764.52
XM_759389.1	1755	1308.49	972	206.14
XM_759390.1	873	706.666	176	69.1135
XM_759391.1	1445	1173.69	387	91.5001
XM_759392.1	1448	1097.11	293	74.1106
XM_759393.1	831	694.025	276	110.357
XM_759394.1	957	758.001	450	164.743
XM_759395.1	888	587.021	252	119.127
XM_759396.1	1248	994.907	332	92.602
XM_759397.1	603	386.677	149	106.931
XM_759398.1	1290	1127.01	243	59.8332
XM_759399.1	1911	1709.32	669	108.61
XM_759400.1	753	475.2	188	109.786
XM_759401.1	324	159.898	101	175.284
XM_759402.1	783	519.986	143	76.3148
XM_759403.1	594	273.274	41	41.6341
XM_759404.1	1119	877.974	360	113.785
XM_759405.1	636	483.499	235	134.877
XM_759406.1	674	543.634	1435	732.504
XM_759407.1	714	425.735	295	192.286
XM_759408.1	522	289.358	193	185.091
XM_759409.1	888	763.732	413	150.063
XM_759410.1	3408	3067.68	1386	125.377
XM_759411.1	519	366.603	201	152.147
XM_759412.1	4407	4186.71	1930	127.923
XM_759413.1	1052	743.369	225	83.9929
XM_759414.1	1911	1508.23	716	131.738
XM_759415.1	1885	1723.47	1116	179.69
XM_759416.1	1746	1673.88	120	19.8939
XM_759417.1	1338	978.969	354	100.346
XM_759418.1	375	195.467	211	299.552
XM_759419.1	4878	4493.71	2297	141.847
XM_759420.1	468	301.284	228	210.002
XM_759421.1	783	579.382	475	227.506
XM_759422.1	1701	1346.59	983	202.574
XM_759423.1	1365	1227.4	225	50.8701
XM_759424.1	2175	1943.84	1260	179.877
XM_759425.1	1872	1545.08	329	59.0895
XM_759426.1	888	679.616	215	87.7888
XM_759427.1	3862	3540.02	4523	354.556
XM_759428.1	3987	3228.51	898	77.1859
XM_759429.1	1176	1014.1	593	162.27
XM_759430.1	2826	2511.71	508	56.1252
XM_759431.1	651	381.728	5	3.6348
XM_759432.1	1068	784.458	357	126.288
XM_759433.1	1128	883.791	470	147.575
XM_759434.1	840	615.908	253	113.991
XM_759435.1	600	434.762	199	127.018
XM_759436.1	649	418.64	282	186.927
XM_759437.1	1477	1256.16	1124	248.304
XM_759438.1	1413	1222.27	831	188.668
XM_759439.1	1063	850.67	780	254.447
XM_759440.1	1470	1198.61	23	5.32496
XM_759441.1	2334	1897.39	374	54.6991
XM_759442.1	2376	1843.58	183	27.5457
XM_759443.1	1191	925.896	189	56.6453
XM_759444.1	810	575.881	17	8.19182
XM_759445.1	4215	3155.71	813	71.4922
XM_759446.1	2274	1842.11	28	4.218
XM_759447.1	513	285.932	159	154.311
XM_759448.1	453	252.633	291	319.644
XM_759449.1	2031	1520.28	149	27.1974
XM_759450.1	3414	3373.18	625	51.4169
XM_759451.1	4767	3445.77	1105	88.9897
XM_759452.1	1738	1596.9	1189	206.618
XM_759453.1	608	419.294	1896	1254.83
XM_759454.1	831	523.42	74	39.2325
XM_759455.1	618	408.06	271	184.293
XM_759456.1	1258	857.498	105	33.9798
XM_759457.1	1489	1260.21	1954	430.275
XM_759458.1	5151	4185.49	190	12.5971
XM_759459.1	1370	927.568	55	16.4544
XM_759460.1	1725	1495.46	399	74.0393
XM_759461.1	1587	1218.62	285	64.8995
XM_759462.1	1299	1000.09	266.841	74.042
XM_759463.1	1614	1231.52	400	90.1327
XM_759464.1	1452	1235.88	195	43.7847
XM_759465.1	1644	1334.25	67.1587	13.9679
XM_759466.1	864	570.293	49	23.8431
XM_759467.1	873	552.854	82	41.1593
XM_759468.1	165	32.4168	16	136.966
XM_759469.1	9903	9685.65	208.018	5.95987
XM_759470.1	1590	1342.13	26.2634	5.43024
XM_759471.1	1419	1177.74	392.469	92.4743
XM_759472.1	1686	1300.88	201.982	43.0864
XM_759473.1	1347	936.124	69.6641	20.651
XM_759474.1	1536	1126.3	170.974	42.1248
XM_759475.1	1569	1149.85	243.42	58.7462
XM_759476.1	1410	1012.23	34.0625	9.3382
XM_759477.1	1497	1231.45	25	5.6336
XM_759478.1	2124	1803.23	19	2.92392
XM_759479.1	765	460.809	131.666	79.2898
XM_759480.1	1740	1455.42	25.4628	4.85493
XM_759481.1	1713	1416.28	39.1332	7.6676
XM_759482.1	1788	1489	56.5372	10.5367
XM_759483.1	1548	1267.11	147.62	32.3293
XM_759484.1	522	273.355	21	21.3185
XM_759485.1	1011	785.445	43	15.1921
XM_759486.1	1353	1049.31	231	61.0906
XM_759487.1	1473	1058.79	46	12.0563
XM_759488.1	2376	1559.07	26	4.62778
XM_759489.1	1338	883.169	39	12.2542
XM_759490.1	1494	949.342	96	28.0616
XM_759491.1	1326	897.828	142.5	44.044
XM_759492.1	4596	4050.01	384.96	26.3769
XM_759493.1	4599	3734.34	113.932	8.46636
XM_759494.1	1659	1355.5	117	23.9524
XM_759495.1	5373	4520.58	158	9.699
XM_759496.1	2304	1740.15	702	111.947
XM_759497.1	831	663.3	365	152.703
XM_759498.1	1050	824.744	1119	376.509
XM_759499.1	1965	1515.12	457	83.7014
XM_759500.1	1713	1460.32	401	76.2013
XM_759501.1	3372	3102.93	876	78.3424
XM_759502.1	501	242.941	107	122.222
XM_759503.1	654	426.592	123	80.0124
XM_759504.1	876	589.439	221	104.044
XM_759505.1	3945	3361.29	721	59.5243
XM_759506.1	1098	681.174	5	2.03693
XM_759507.1	864	463.072	4	2.39704
XM_759508.1	1938	1373.74	4	0.808017
XM_759509.1	2328	2119.6	490	64.1516
XM_759510.1	1170	999.661	694	192.651
XM_759511.1	687	452.947	125	76.582
XM_759512.1	650	432.824	639	409.688
XM_759513.1	1737	1252.4	61.1973	13.5599
XM_759514.1	2053	1580.4	1664	292.179
XM_759515.1	1948	1972.51	1619	227.767
XM_759516.1	1386	1103.7	251	63.1087
XM_759517.1	1053	870.386	843	268.77
XM_759518.1	1041	972.731	355	101.275
XM_759519.1	1752	1259.08	124.803	27.5064
XM_759520.1	1089	1014.81	181	49.4945
XM_759521.1	1072	891.724	715	222.505
XM_759522.1	1239	1280.99	197	42.6761
XM_759523.1	831	593.093	118	55.2107
XM_759524.1	673	494.357	604	339.048
XM_759525.1	1791	1473.35	671	126.38
XM_759526.1	420	237.385	205	239.643
XM_759527.1	2874	2697.21	180	18.5192
XM_759528.1	1755	1549.66	180	32.2329
XM_759529.1	1845	1282.21	27	5.84347
XM_759530.1	1458	1124.86	155	38.2381
XM_759531.1	2751	1975.73	433	60.8169
XM_759532.1	1143	1156.27	310	74.3987
XM_759533.1	1529	1284.33	591	127.695
XM_759534.1	1113	1145.56	219	53.0506
XM_759535.1	2634	2221.31	907	113.309
XM_759536.1	1869	1828.05	160	24.2882
XM_759537.1	1042	987.715	991	278.424
XM_759538.1	2580	2592.51	867	92.8032
XM_759539.1	1539	1264.04	582	127.769
XM_759540.1	672	486.416	1138	649.23
XM_759541.1	819	647.6	17	7.28461
XM_759542.1	786	626.053	605	268.169
XM_759543.1	747	612.739	717	324.719
XM_759544.1	1035	866.945	236	75.5414
XM_759545.1	285	123.704	219	491.273
XM_759546.1	3270	3060.39	1575	142.813
XM_759547.1	882	571.235	113	54.8944
XM_759548.1	1950	1433.77	568	109.934
XM_759549.1	1206	1029.78	308	82.9989
XM_759550.1	1453	1102.52	319	80.291
XM_759551.1	3042	2687.74	854	88.1729
XM_759552.1	1042	794.721	151	52.7262
XM_759553.1	1446	1240.86	250	55.9092
XM_759554.1	628	396.863	886	619.523
XM_759555.1	1016	740.904	242	90.6396
XM_759556.1	328	163.702	238	403.447
XM_759557.1	792	627.707	311	137.489
XM_759558.1	1145	1067.63	4166	1082.84
XM_759559.1	915	756.997	3387	1241.61
XM_759560.1	843	618.958	102	45.7302
XM_759561.1	264	105.083	61	161.088
XM_759562.1	1500	1160.84	202	48.2883
XM_759563.1	2133	1991.59	2992	416.895
XM_759564.1	1428	1098.7	438	110.626
XM_759565.1	708	539.889	1366	702.118
XM_759566.1	794	561.185	988	488.557
XM_759567.1	438	223.079	194	241.328
XM_759568.1	309	145.703	138	262.83
XM_759569.1	816	647.265	1421	609.223
XM_759570.1	465	248.541	95	106.069
XM_759571.1	1377	1251.26	712	157.905
XM_759572.1	1377	1131.01	569	139.608
XM_759573.1	1839	1386.98	46	9.20349
XM_759574.1	1716	1410.75	16.815	3.3076
XM_759575.1	1353	1035.19	68.185	18.2781
XM_759576.1	362	196.528	23	32.4765
XM_759577.1	1196	829.248	311	104.074
XM_759578.1	249	91.979	76	229.292
XM_759579.1	345	179.888	62	95.643
XM_759580.1	780	491.342	139	78.5046
XM_759581.1	675	386.468	169	121.349
[truncated: 2,062 more rows]

## Sheet: Piroplam 1_abundance.tsv
target_id	length	eff_length	est_counts	tpm
XM_757577.1	618	448.205	0	0
XM_757578.1	534	364.397	0	0
XM_757579.1	741	241.91	12	8.78797
XM_757580.1	237	85.3759	0	0
XM_757581.1	699	529.205	0	0
XM_757582.1	426	257.31	9	6.19649
XM_757583.1	204	61.2574	0	0
XM_757584.1	363	196.529	0	0
XM_757585.1	624	454.205	0	0
XM_757586.1	465	295.848	0	0
XM_757587.1	336	171.04	0	0
XM_757588.1	579	409.247	0	0
XM_757589.1	624	176.56	6	6.02033
XM_757590.1	306	143.451	0	0
XM_757591.1	117	14.9629	0	0
XM_757592.1	423	254.31	0	0
XM_757593.1	375	207.797	13	11.0832
XM_757594.1	672	502.205	0	0
XM_757595.1	1236	524.044	19	6.42312
XM_757596.1	402	233.846	2	1.51516
XM_757597.1	642	472.205	0	0
XM_757598.1	585	415.247	0	0
XM_757599.1	1509	504.824	6	2.10558
XM_757600.1	1590	563.438	10	3.14423
XM_757601.1	225	76.0421	0	0
XM_757602.1	294	132.883	0	0
XM_757603.1	183	47.1999	0	0
XM_757604.1	3018	1092.96	13	2.10717
XM_757605.1	1605	625.634	5	1.41583
XM_757606.1	492	322.599	0	0
XM_757607.1	231	80.6253	0	0
XM_757608.1	525	355.397	0	0
XM_757609.1	162	34.5113	0	0
XM_757610.1	237	85.3759	0.333333	0.691677
XM_757611.1	525	355.397	0	0
XM_757612.1	162	34.5113	0	0
XM_757613.1	237	85.3759	0.333333	0.691677
XM_757614.1	492	322.599	0	0
XM_757615.1	381	213.499	16	13.2765
XM_757616.1	237	85.3759	0.333333	0.691677
XM_757617.1	525	355.397	0	0
XM_757618.1	1092	345.674	5	2.5625
XM_757619.1	948	778.205	0	0
XM_757620.1	693	523.205	0	0
XM_757621.1	1407	1168.84	176.622	26.7701
XM_757622.1	2025	1852.13	852.734	81.5645
XM_757623.1	2019	1794.06	1752.01	173.005
XM_757624.1	2214	2118.82	218.002	18.2275
XM_757625.1	2049	1987.46	8.79601	0.784056
XM_757626.1	1440	1389.71	473.823	60.4023
XM_757627.1	580	395.956	2072.4	927.228
XM_757628.1	1467	1333.85	1139.98	151.409
XM_757629.1	2010	1808.76	795.266	77.8919
XM_757630.1	1476	1382.73	434.211	55.6319
XM_757631.1	1407	1168.84	176.622	26.7701
XM_757632.1	1476	1377.29	757.3	97.4099
XM_757633.1	1647	1355.16	582.185	76.1083
XM_757634.1	2007	1817.95	609.163	59.3625
XM_757635.1	1638	1456.54	34.7252	4.22359
XM_757636.1	1440	1389.71	473.823	60.4023
XM_757637.1	2049	1987.46	8.79601	0.784056
XM_757638.1	2214	2128.82	1125.85	93.692
XM_757639.1	1473	1335.95	94.2033	12.4921
XM_757640.1	1818	1712.76	11.0142	1.13925
XM_757641.1	2010	1869.49	342.023	32.4111
XM_757642.1	2001	1796.44	8.35832	0.824262
XM_757643.1	1470	1272.17	328.795	45.7869
XM_757644.1	1218	1018.03	677.855	117.961
XM_757645.1	1249	1096.06	137.079	22.1563
XM_757646.1	1452	1351.58	399.332	52.3421
XM_757647.1	1452	1327.59	211.873	28.2729
XM_757648.1	2388	2202.51	895.155	72.0013
XM_757649.1	237	85.3759	212	439.907
XM_757650.1	833	543.952	277	90.2151
XM_757651.1	1359	967.789	1009	184.702
XM_757652.1	1807	751.45	391	92.18
XM_757653.1	222	73.8066	311	746.492
XM_757654.1	1405	866.58	534	109.167
XM_757655.1	984	758.914	651	151.967
XM_757656.1	447	186.338	40	38.0294
XM_757657.1	1944	1507.71	385	45.2381
XM_757658.1	1122	758.513	712	166.294
XM_757659.1	1092	795.441	558	124.276
XM_757660.1	2415	1654.49	1368	146.482
XM_757661.1	405	236.775	196	146.649
XM_757662.1	999	474.984	1351	503.891
XM_757663.1	417	193.951	13	11.8744
XM_757664.1	951	480.595	53	19.537
XM_757665.1	684	343.001	50	25.8247
XM_757666.1	867	401.624	55.4341	24.4522
XM_757667.1	816	386.926	477	218.399
XM_757668.1	399	230.986	41.5659	31.8796
XM_757669.1	729	393.208	94	42.3512
XM_757670.1	1192	831.498	3996	851.382
XM_757671.1	1544	1134.08	601	93.8838
XM_757672.1	900	504.13	244	85.7448
XM_757673.1	747	519.358	946	322.69
XM_757674.1	447	263.674	1053	707.492
XM_757675.1	2223	2002.83	2052	181.507
XM_757676.1	1032	933.013	1145	217.409
XM_757677.1	1404	975.522	2957	537
XM_757678.1	2013	1199.93	299	44.1445
XM_757679.1	297	135.561	175	228.698
XM_757680.1	3687	3119.6	1725	97.9605
XM_757681.1	231	80.6253	354	777.844
XM_757682.1	6162	5465.63	4772	154.675
XM_757683.1	1227	841.77	219	46.0905
XM_757684.1	490	362.141	475	232.368
XM_757685.1	3477	3472.42	2894	147.648
XM_757686.1	805	642.908	3178	875.72
XM_757687.1	984	1057.84	845	141.513
XM_757688.1	3246	3431.42	1797	92.7759
XM_757689.1	498	412.872	48	20.5962
XM_757690.1	1551	1545.82	693	79.4211
XM_757691.1	2154	1657.19	7	0.748317
XM_757692.1	411	191.449	713	659.778
XM_757693.1	1470	1151.7	789	121.366
XM_757694.1	4716	4980.9	1798	63.9503
XM_757695.1	1173	855.454	1102	228.216
XM_757696.1	582	454.15	303	118.196
XM_757697.1	579	436.364	376	152.651
XM_757698.1	7080	6754.56	3599	94.3942
XM_757699.1	5664	4680.96	98	3.70895
XM_757700.1	5766	5037.36	2657	93.4434
XM_757701.1	198	57.0126	280	870.056
XM_757702.1	339	173.916	7	7.13047
XM_757703.1	1829	1528.23	751	87.0584
XM_757704.1	747	332.057	288	153.653
XM_757705.1	1116	876.541	194	39.2094
XM_757706.1	3898	3131.6	1895	107.202
XM_757707.1	1338	880.923	24	4.82651
XM_757708.1	1800	1668.45	927	98.4302
XM_757709.1	633	448.53	92	36.3376
XM_757710.1	624	461.433	1274	489.126
XM_757711.1	546	364.843	55	26.7065
XM_757712.1	1122	752.121	331	77.9652
XM_757713.1	1569	996.168	1798	319.755
XM_757714.1	679	367.172	1898	915.771
XM_757715.1	408	255.483	244	169.195
XM_757716.1	294	132.883	568	757.248
XM_757717.1	222	73.8066	437	1048.93
XM_757718.1	846	388.535	57	25.9899
XM_757719.1	1434	827.052	412	88.2521
XM_757720.1	927	765.046	645	149.359
XM_757721.1	1223	692.49	422	107.959
XM_757722.1	2254	1658.05	4898	523.337
XM_757723.1	1596	1401.14	1535	194.083
XM_757724.1	1972	1624.55	2274	247.98
XM_757725.1	937	746.466	1451	344.364
XM_757726.1	384	177.307	207	206.826
XM_757727.1	5172	3478.65	1035	52.7097
XM_757728.1	1009	746.907	3698	877.124
XM_757729.1	1458	1247.56	1369	194.403
XM_757730.1	240	87.6762	67	135.38
XM_757731.1	853	463.007	466	178.303
XM_757732.1	1779	1008.21	38	6.67716
XM_757733.1	1984	1250.11	256	36.2786
XM_757734.1	1644	1400.96	560	70.8144
XM_757735.1	699	397.565	360	160.419
XM_757736.1	1659	1258.96	845	118.906
XM_757737.1	240	87.6762	104	210.141
XM_757738.1	177	43.4292	31	126.456
XM_757739.1	219	71.6608	20	49.4434
XM_757740.1	1413	978.414	535	96.8705
XM_757741.1	556	372.308	1033	491.539
XM_757742.1	1611	1287.89	86	11.8299
XM_757743.1	273	114.773	120	185.225
XM_757744.1	830	608.162	143	41.656
XM_757745.1	1791	1506.29	636	74.8013
XM_757746.1	1359	1229.23	1038	149.597
XM_757747.1	589	479.585	3728	1377.12
XM_757748.1	744	539.836	2011	659.949
XM_757749.1	1234	950.3	6757	1259.66
XM_757750.1	1182	717.861	399	98.4675
XM_757751.1	1728	1037.93	15.4845	2.64294
XM_757752.1	3546	2320.53	199.786	15.2524
XM_757753.1	1608	956.816	696	128.867
XM_757754.1	1995	1926.03	1303	119.851
XM_757755.1	276	117.34	19	28.6858
XM_757756.1	919	782.849	270	61.1007
XM_757757.1	399	203.39	187	162.882
XM_757758.1	420	351.315	248	125.059
XM_757759.1	1761	1253.99	1246	176.03
XM_757760.1	1140	811.417	594	129.689
XM_757761.1	1848	1667.56	810	86.0523
XM_757762.1	801	838.06	740	156.429
XM_757763.1	315	151.497	138	161.375
XM_757764.1	390	222.259	153	121.953
XM_757765.1	999	654.594	324	87.6867
XM_757766.1	417	263.596	445	299.076
XM_757767.1	374	206.797	542	464.319
XM_757768.1	2907	1922.14	801	73.8256
XM_757769.1	2001	1394.38	998	126.797
XM_757770.1	249	94.7932	596	1113.86
XM_757771.1	2131	1271.42	64	8.91765
XM_757772.1	1734	1069.03	319	52.8639
XM_757773.1	822	597.011	474	140.655
XM_757774.1	1054	569.483	792	246.38
XM_757775.1	878	561.384	2835	894.65
XM_757776.1	563	384.151	1417	653.474
XM_757777.1	3735	3274.28	684	37.0084
XM_757778.1	6929	5399.53	1854	60.8294
XM_757779.1	2181	1247.01	13.3355	1.89453
XM_757780.1	3075	2059.63	273.985	23.5667
XM_757781.1	975	790.294	2110	472.992
XM_757782.1	5022	3974.45	531	23.6689
XM_757783.1	162	34.5113	7	35.9333
XM_757784.1	1544	1128.75	589	92.4442
XM_757785.1	2460	1618.51	5665	620.074
XM_757786.1	715	574.074	4321	1333.45
XM_757787.1	573	243.756	498	361.938
XM_757788.1	609	362.766	41	20.0225
XM_757789.1	1359	1210.81	450	65.8409
XM_757790.1	588	236.657	115	86.0871
XM_757791.1	1629	921.133	181	34.811
XM_757792.1	558	437.922	343	138.758
XM_757793.1	1335	1195.49	725	107.437
XM_757794.1	7470	5587.79	2182	69.1791
XM_757795.1	666	403.825	602	264.097
XM_757796.1	1136	792.332	1428	319.287
XM_757797.1	588	417.216	367	155.835
XM_757798.1	585	252.478	316	221.73
XM_757799.1	1064	500.39	222	78.5967
XM_757800.1	324	159.78	359	398.045
XM_757801.1	1374	788.821	169	37.955
XM_757802.1	1257	714.633	161	39.9119
XM_757803.1	471	176.211	567	570.045
XM_757804.1	1410	904.555	1077	210.931
XM_757805.1	451	230.894	305	234.017
XM_757806.1	684	467.943	2431	920.349
XM_757807.1	1093	690.91	1340	343.593
XM_757808.1	504	236.029	62	46.5358
XM_757809.1	654	509.943	270	93.7999
XM_757810.1	903	455.339	101	39.2958
XM_757811.1	585	383.116	621	287.158
XM_757812.1	699	500.3	1306	462.459
XM_757813.1	1476	991.455	1233	220.318
XM_757814.1	357	173.48	175	178.71
XM_757815.1	843	504.57	404	141.847
XM_757816.1	5391	3484.32	962.409	48.9331
XM_757817.1	3468	2816.45	635	39.9422
XM_757818.1	1859	1544.58	1534	175.944
XM_757819.1	2703	2137.89	222	18.3962
XM_757820.1	1800	1375.86	306	39.4009
XM_757821.1	5280	3642	410	19.9436
XM_757822.1	696	370.822	135	64.4953
XM_757823.1	580	332.694	550	292.872
XM_757824.1	462	264.296	40	26.812
XM_757825.1	2409	1824.3	370	35.9307
XM_757826.1	525	371.686	85	40.5138
XM_757827.1	963	836.517	311	65.8637
XM_757828.1	1590	1196.68	142	21.0219
XM_757829.1	1086	595.167	116	34.5287
XM_757830.1	1071	687.293	34	8.7639
XM_757831.1	201	59.0474	28	84.0074
XM_757832.1	1062	588.215	7	2.10825
XM_757833.1	1182	839.893	449	94.7071
XM_757834.1	948	797.954	172	38.1866
XM_757835.1	594	468.642	118	44.6068
XM_757836.1	945	638.174	166	46.0818
XM_757837.1	231	80.6253	7	15.3811
XM_757838.1	267	109.567	113	182.709
XM_757839.1	1390	1042.66	254	43.1572
XM_757840.1	723	596.118	468	139.083
XM_757841.1	1047	788.899	134	30.0915
XM_757842.1	2016	1212.8	237	34.6195
XM_757843.1	195	55.0426	64	205.988
XM_757844.1	1008	480.511	263	96.9645
XM_757845.1	306	143.451	33	40.754
XM_757846.1	450	267.41	43	28.4872
XM_757847.1	2418	2159.1	521	42.7489
XM_757848.1	1459	1289.74	3401	467.159
XM_757849.1	448	219.235	1103	891.303
XM_757850.1	339	232.846	922	701.491
XM_757851.1	768	594.001	3984	1188.21
XM_757852.1	780	850.366	1933	402.704
XM_757853.1	2241	2093.57	775	65.5805
XM_757854.1	1697	1145.3	855	132.254
XM_757855.1	1371	1203.13	2182	321.294
XM_757856.1	1341	1179.53	189	28.3865
XM_757857.1	2492	2128.19	1021	84.9916
XM_757858.1	2658	2321.15	631	48.1601
XM_757859.1	3036	3405.37	2977	154.873
XM_757860.1	1269	1260.36	325	45.6825
XM_757861.1	2262	2536.23	8177	571.171
XM_757862.1	673	419.858	369	155.698
XM_757863.1	522	470.523	497	187.127
XM_757864.1	426	300.001	49	28.9357
XM_757865.1	2721	2519.73	1706	119.946
XM_757866.1	1053	914.521	6	1.1623
XM_757867.1	770	750.582	1007	237.679
XM_757868.1	234	82.9542	191	407.902
XM_757869.1	2724	2245.59	1146	90.4095
XM_757870.1	783	602.021	107	31.4871
XM_757871.1	1722	1436.18	375	46.2575
XM_757872.1	1391	1088.12	1362	221.748
XM_757873.1	1254	1227.57	756	109.103
XM_757874.1	357	180.222	307	301.78
XM_757875.1	270	112.162	826	1304.65
XM_757876.1	1389	1041.21	428	72.8227
XM_757877.1	1251	1066.89	163	27.0664
XM_757878.1	1731	1537.44	594	68.4462
XM_757879.1	1068	788.939	442	99.252
XM_757880.1	1771	1359.19	1501	195.642
XM_757881.1	1194	689.928	185	47.5038
XM_757882.1	660	225.775	79	61.9886
XM_757883.1	1431	1307.6	3431	464.844
XM_757884.1	737	376.126	2841	1338.13
XM_757885.1	582	380.752	275	127.953
XM_757886.1	633	293.368	1209	730.086
XM_757887.1	1584	898.582	36	7.0975
XM_757888.1	1062	628.258	348	98.13
XM_757889.1	640	430.477	274	112.762
XM_757890.1	840	548.024	1068	345.249
XM_757891.1	576	326.355	276	149.823
XM_757892.1	866	575.364	5475	1685.78
XM_757893.1	4359	3524.72	1350	67.8532
XM_757894.1	4341	3314.82	901	48.1532
XM_757895.1	5895	4004.94	1585	70.1121
XM_757896.1	4128	3141.43	9636.22	543.425
XM_757897.1	2343	1384.18	32	4.09559
XM_757898.1	1209	583.771	4	1.21389
XM_757899.1	1560	919.84	15	2.88894
XM_757900.1	1564	1112.63	17	2.70681
XM_757901.1	1173	718.027	4	0.986914
XM_757902.1	1692	1117.69	154.295	24.4564
XM_757903.1	1989	1442.09	2.11532	0.259864
XM_757904.1	1296	796.53	20.307	4.51653
XM_757905.1	1533	964.961	4.039	0.741523
XM_757906.1	1920	1319.75	38.5	5.16807
XM_757907.1	1530	1034.79	32.5119	5.56607
XM_757908.1	447	277.963	1	0.637343
XM_757909.1	1026	559.931	12	3.7967
XM_757910.1	1530	960.687	4.961	0.914846
XM_757911.1	1920	1319.75	38.5	5.16807
XM_757912.1	1830	1183.4	202.488	30.313
XM_757913.1	1707	1172.22	284	42.9208
XM_757914.1	1824	1253.29	32	4.52332
XM_757915.1	1614	969.966	6	1.09586
XM_757916.1	1989	1442.09	2.11532	0.259864
XM_757917.1	1446	889.264	18.693	3.72398
XM_757918.1	1395	836.035	147	31.1497
XM_757919.1	1398	908.457	75	14.6257
XM_757920.1	1095	724.59	41	10.0243
XM_757921.1	1275	831.94	1	0.212945
XM_757922.1	1344	932.827	3	0.569745
XM_757923.1	462	292.878	8	4.8391
XM_757924.1	1854	1126.78	189	29.7155
XM_757925.1	1305	1101.13	9.408	1.51362
XM_757926.1	1590	1189.3	5.57979	0.831164
XM_757927.1	1476	1042.42	8.99501	1.5287
XM_757928.1	1476	1041.79	8	1.36041
XM_757929.1	1098	569.04	8	2.49062
XM_757930.1	1707	1031.94	125.498	21.5447
XM_757931.1	1503	915.983	101	19.5341
XM_757932.1	552	177.956	48	47.7848
XM_757933.1	4590	3045.06	1869	108.736
XM_757934.1	2736	2173.51	11249	916.88
XM_757935.1	711	519.211	1007	343.594
XM_757936.1	852	410.385	2280	984.245
XM_757937.1	1679	1717.33	1674	172.688
XM_757938.1	429	217.118	78	63.6442
XM_757939.1	2222	1642.07	1166	125.796
XM_757940.1	1104	1061.4	2023	337.659
XM_757941.1	1353	1325.27	672	89.8305
XM_757942.1	177	43.4292	28	114.218
XM_757943.1	1065	942.29	1251	235.198
XM_757944.1	297	135.561	508	663.879
XM_757945.1	1287	964.52	373	68.5106
XM_757946.1	1068	781.217	523	118.602
XM_757947.1	2184	1736.73	33	3.36622
XM_757948.1	1440	1262.23	69	9.68439
XM_757949.1	1215	1193.94	1723	255.66
XM_757950.1	270	112.162	136	214.809
XM_757951.1	869	752.151	591	139.201
XM_757952.1	765	672.671	302	79.5361
XM_757953.1	402	221.692	587	469.081
XM_757954.1	1635	1447.36	240	29.3762
XM_757955.1	612	337.588	533	279.705
XM_757956.1	1227	1195.29	143	21.1945
XM_757957.1	774	602.776	34	9.99272
XM_757958.1	998	783.57	143	32.331
XM_757959.1	1524	1090.36	1909.52	310.251
XM_757960.1	606	405.056	3310	1447.68
XM_757961.1	564	443.496	760	303.587
XM_757962.1	867	803.965	325	71.6154
XM_757963.1	432	217.15	587	478.893
XM_757964.1	1131	1006.43	824	145.046
XM_757965.1	606	469.462	52	19.6229
XM_757966.1	1314	1361.06	14	1.82226
XM_757967.1	1323	1154.47	981	150.538
XM_757968.1	363	196.529	556	501.196
XM_757969.1	273	114.773	103	158.985
XM_757970.1	390	242.326	569	415.979
XM_757971.1	1434	1707.74	997	103.427
XM_757972.1	951	851.606	1704	354.48
XM_757973.1	1581	1354.32	2842	371.762
XM_757974.1	5043	4975.1	1991	70.8974
XM_757975.1	1336	1183	374	56.0077
XM_757976.1	480	298.817	5706	3382.88
XM_757977.1	555	386.084	308	141.328
XM_757978.1	649	399.001	1780	790.327
XM_757979.1	540	245.729	179	129.05
XM_757980.1	1506	913.887	155	30.0469
XM_757981.1	1796	1391.31	1759	223.977
XM_757982.1	1542	1062.26	569	94.8943
XM_757983.1	1257	946.4	441	82.5514
XM_757984.1	660	467.74	545	206.42
XM_757985.1	3745	3386.83	8407	439.752
XM_757986.1	414	211.317	326	273.303
XM_757987.1	1806	1441.32	118	14.5038
XM_757988.1	888	546.096	412	133.656
XM_757989.1	1422	1250.04	2308.86	327.217
XM_757990.1	1428	1151.97	307.135	47.2332
XM_757991.1	2011	1629.94	696	75.6482
XM_757992.1	2010	1200.85	642	94.7121
XM_757993.1	321	192.293	993	914.842
XM_757994.1	234	82.9542	198	422.851
XM_757995.1	627	562.331	672	211.708
XM_757996.1	849	772.728	338	77.4908
XM_757997.1	1600	1337.7	172	22.7788
XM_757998.1	774	640.059	174	48.1603
XM_757999.1	432	271.812	10	6.51765
XM_758000.1	783	611.045	629	182.363
XM_758001.1	510	238.886	341	252.885
XM_758002.1	525	226.055	126	98.7454
XM_758003.1	1590	1209.74	697	102.07
XM_758004.1	1866	1603.01	690	76.256
XM_758005.1	2121	1212.5	142	20.7476
XM_758006.1	696	363.671	29	14.127
XM_758007.1	734	465.066	400	152.372
XM_758008.1	2604	1859.89	612	58.294
XM_758009.1	804	515.785	546	187.536
XM_758010.1	2604	2246.01	3772	297.523
XM_758011.1	885	681.225	511	132.89
XM_758012.1	1932	1038.44	45	7.677
XM_758013.1	837	483.618	1040	380.97
XM_758014.1	695	401.386	1200	529.638
XM_758015.1	984	846.532	2343	490.331
XM_758016.1	951	751.26	1118	263.64
XM_758017.1	1974	1696.07	956	99.8561
XM_758018.1	2568	2864.64	4315	266.853
XM_758019.1	531	389.975	701	318.45
XM_758020.1	690	477.95	1546	573.044
XM_758021.1	432	366.611	68	32.8597
XM_758022.1	1377	1417.82	1783	222.787
XM_758023.1	477	311.657	223	126.762
XM_758024.1	708	439.19	11	4.43712
XM_758025.1	668	638.507	621	172.3
XM_758026.1	687	589.279	452	135.887
XM_758027.1	2970	3018.66	429	25.177
XM_758028.1	594	345.523	17	8.71631
XM_758029.1	735	536.208	22	7.26858
XM_758030.1	810	712.71	478	118.816
XM_758031.1	699	660.497	1223	328.032
XM_758032.1	2742	2455.83	1313	94.7166
XM_758033.1	2007	2227.52	1446	115.003
XM_758034.1	3157	3416.45	5451	282.658
XM_758035.1	1704	2114.74	416	34.8495
XM_758036.1	1998	1962.26	770	69.5174
XM_758037.1	1683	1363.37	2194	285.091
XM_758038.1	567	411.241	338	145.607
XM_758039.1	5091	4614.5	255.666	9.81541
XM_758040.1	165	36.2525	275	1343.86
XM_758041.1	135	21.4009	131	1084.42
XM_758042.1	438	224.629	289	227.926
XM_758043.1	2076	1490.98	304	36.1212
XM_758044.1	597	274.003	23	14.8708
XM_758045.1	2303	1336.86	507	67.1864
XM_758046.1	643	279.274	144	91.3466
XM_758047.1	2244	1244.51	205	29.1822
XM_758048.1	1446	961.604	949	174.836
XM_758049.1	3093	2663.28	1625	108.093
XM_758050.1	1021	604.575	683	200.138
XM_758051.1	1002	621.302	1490	424.858
XM_758052.1	525	308.101	28	16.1
XM_758053.1	2997	2135.86	265	21.9803
XM_758054.1	939	664.243	1226	326.982
XM_758055.1	363	196.529	36	32.4516
XM_758056.1	1233	750.212	332	78.3997
XM_758057.1	339	173.916	210	213.914
XM_758059.1	576	369.04	43	20.6422
XM_758060.1	573	290.681	43	26.2067
XM_758061.1	927	845.048	949	198.951
XM_758062.1	2076	1762.07	1481	148.899
XM_758063.1	1056	775.963	178	40.6387
XM_758064.1	390	265.434	240	160.183
XM_758065.1	1947	1619.13	815	89.1736
XM_758066.1	786	509.622	224	77.8682
XM_758067.1	1153	789.512	552	123.863
XM_758068.1	2184	1432.27	257	31.7883
XM_758069.1	5301	4391.83	1361	54.9
XM_758070.1	525	247.653	138	98.718
XM_758071.1	2820	2295	2646	204.252
XM_758072.1	1494	1416.82	6321	790.37
XM_758073.1	4302	3480.87	12077	614.655
XM_758074.1	1824	1414.82	677	84.7708
XM_758075.1	387	276.939	201	128.58
XM_758076.1	447	325.323	3927	2138.48
XM_758077.1	411	333.466	2452	1302.66
XM_758078.1	2339	2333.16	1047	79.4991
XM_758079.1	483	287.176	321	198.024
XM_758080.1	675	435.28	1429	581.6
XM_758081.1	552	273.172	145	94.0355
XM_758082.1	937	702.608	1569	395.612
XM_758083.1	1506	1051.5	350	58.9686
XM_758084.1	1296	1028.43	694	119.548
XM_758085.1	1470	1367.72	1361	176.287
XM_758086.1	1350	936.031	70	13.2485
XM_758087.1	1555	1221.15	1611	233.716
XM_758088.1	603	463.643	2930	1119.55
XM_758089.1	1995	1332.59	432	57.4312
XM_758090.1	4962	4314.01	65	2.66927
XM_758091.1	420	187.764	725	684.047
XM_758092.1	673	459.358	1455	561.142
XM_758093.1	7086	6453.21	3852	105.748
XM_758094.1	720	445.99	154	61.1725
XM_758095.1	6840	4061.07	280	12.2146
XM_758096.1	2037	1543.62	484	55.5475
XM_758097.1	2967	2259.6	1000	78.4022
XM_758098.1	529	242.322	133	97.2342
XM_758099.1	417	248.461	37	26.3818
XM_758100.1	951	673.345	523	137.602
XM_758101.1	501	265.936	70	46.6317
XM_758102.1	240	87.6762	167	337.439
XM_758103.1	351	204.539	341	295.352
XM_758104.1	1335	1012.43	171	29.922
XM_758105.1	2217	1854.89	1021	97.5142
XM_758106.1	2253	1981.96	9267	828.332
XM_758107.1	1473	1184.21	1178	176.228
XM_758108.1	1647	1464.16	1078	130.434
XM_758109.1	1443	1389.86	417	53.1528
XM_758110.1	5046	6129.51	6699	193.618
XM_758111.1	1179	797.19	611	135.781
XM_758112.1	426	179.566	35	34.5306
XM_758113.1	1098	980.465	122	22.0439
XM_758114.1	276	117.34	163	246.094
XM_758115.1	132	20.3141	33	287.79
XM_758116.1	714	570.249	202	62.7548
XM_758117.1	2871	1928.33	999	91.7794
XM_758118.1	1041	737.809	56	13.4463
XM_758119.1	1107	891.046	51	10.1398
XM_758120.1	2520	1986.55	1863	166.14
XM_758121.1	1989	1536.47	842	97.0842
XM_758122.1	2139	1444.13	155	19.0145
XM_758123.1	453	233.466	70	53.1171
XM_758124.1	1172	1054.62	1035	173.863
XM_758125.1	2550	2298.25	1720	132.584
XM_758126.1	1530	1290.99	570	78.2191
XM_758127.1	4366	3641.31	1009	49.0902
XM_758128.1	2532	2049.06	442	38.2145
XM_758129.1	1173	719.368	126	31.0298
XM_758130.1	1416	959.901	1135	209.474
XM_758131.1	2097	1932.74	1799	164.899
XM_758132.1	1530	809.458	100	21.886
XM_758133.1	903	583.02	339	103.009
XM_758134.1	744	431.985	166	68.0769
XM_758135.1	1740	1334.07	1322	175.555
XM_758136.1	321	156.975	118	133.172
XM_758137.1	3324	2877	1842	113.425
XM_758138.1	3363	3078.17	19	1.09351
XM_758139.1	615	280.607	608	383.854
XM_758140.1	1517	1233.91	1364	195.835
XM_758141.1	1487	888.213	546	108.902
XM_758142.1	543	353.476	7037	3526.86
XM_758143.1	885	509.011	190	66.1282
XM_758144.1	882	681.275	34	8.84132
XM_758145.1	1512	1367.97	778	100.755
XM_758146.1	414	243.012	349	254.424
XM_758147.1	1251	1131.66	442	69.1936
XM_758148.1	561	268.811	1147	755.923
XM_758149.1	1251	1012.94	1715	299.944
XM_758150.1	549	324.33	121	66.0935
XM_758151.1	631	385.793	374	171.742
XM_758152.1	1500	1392.69	354	45.0308
XM_758153.1	441	292.53	135	81.7568
XM_758154.1	705	395.619	45	20.151
XM_758155.1	1977	2008.78	485	42.7729
XM_758156.1	1563	1261.88	539	75.671
XM_758157.1	1895	1629	170	18.4879
XM_758158.1	1391	873.038	1528	310.064
XM_758159.1	759	440.3	29	11.6683
XM_758160.1	3171	2708.74	688	44.9967
XM_758161.1	2746	2206.38	2478	198.967
XM_758162.1	5244	4327.53	1869	76.512
XM_758163.1	1396	735.445	202	48.6588
XM_758164.1	1164	489.18	48	17.3833
XM_758165.1	1923	998.257	137	24.313
XM_758166.1	3930	2109.47	267	22.4232
XM_758167.1	4281	2875.81	216.939	13.3641
XM_758168.1	5220	3756.15	20	0.943294
XM_758169.1	2631	1503.34	353	41.5986
XM_758170.1	1152	513.741	55	18.9661
XM_758171.1	933	763.205	0	0
XM_758172.1	1785	1734.84	45	4.59531
XM_758173.1	1479	961.176	633	116.671
XM_758174.1	1173	1058.1	841	140.809
XM_758175.1	1233	894.329	220	43.5798
XM_758176.1	2187	1419.28	546	68.1529
XM_758177.1	1113	794.443	214	47.7212
XM_758178.1	1218	1196.69	3164	468.397
XM_758179.1	1066	842.596	499	104.916
XM_758180.1	420	251.336	86	60.6185
XM_758181.1	345	179.628	51	50.2985
XM_758182.1	1365	1342.21	6968	919.706
XM_758183.1	1782	1492.62	1999	237.26
XM_758184.1	1107	822.826	138	29.712
XM_758185.1	1353	933.086	648	123.031
XM_758186.1	594	398.12	130	57.8482
XM_758187.1	1005	632.249	332	93.0273
XM_758188.1	2367	1592.27	287	31.9319
XM_758189.1	1176	927.979	443	84.5719
XM_758190.1	747	501.724	1468	518.348
XM_758191.1	1680	1248.42	551	78.1898
XM_758192.1	582	387.993	207	94.5162
XM_758193.1	3465	2964.39	252	15.06
XM_758194.1	828	646.039	216	59.2318
XM_758195.1	2050	1363.86	983	127.686
XM_758196.1	828	661.55	519	138.984
XM_758197.1	660	277.244	395	252.404
XM_758198.1	330	165.349	40	42.8567
XM_758199.1	534	253.017	20	14.0036
XM_758200.1	1134	742.343	118	28.1603
XM_758201.1	1080	772.654	1172	268.722
XM_758202.1	522	219.444	63	50.86
XM_758203.1	171	39.9487	171	758.322
XM_758204.1	1881	1491.18	270	32.0769
XM_758205.1	1383	1197.63	3087	456.64
XM_758206.1	1494	1381.49	183989	23594.1
XM_758207.1	1386	1415	20460	2561.6
XM_758208.1	1326	883.85	21634	4336.29
XM_758209.1	1332	1043.28	2725.48	462.811
XM_758210.1	1323	1111.7	17619.5	2807.8
XM_758211.1	339	173.916	74	75.3792
XM_758212.1	2130	2254.56	31	2.4359
XM_758213.1	2103	1608.24	157	17.2946
XM_758214.1	1014	557.769	72	22.8686
XM_758215.1	1773	1418.32	119	14.864
XM_758216.1	336	171.04	210	217.512
XM_758217.1	8211	8854.99	4495	89.9295
XM_758218.1	804	688.465	1341	345.07
XM_758219.1	758	651.37	727	197.728
XM_758220.1	1326	984.324	633	113.927
XM_758221.1	2529	2297.46	422	32.5406
XM_758222.1	1887	1568.2	320	36.15
XM_758223.1	636	356.362	6	2.98278
XM_758224.1	2313	2767.56	58	3.71271
XM_758225.1	621	597.817	936	277.375
XM_758226.1	396	193.318	218	199.776
XM_758227.1	900	797.845	433	96.1456
XM_758228.1	246	92.4823	441	844.773
XM_758229.1	1425	1394.66	256	32.5185
XM_758230.1	2463	2701.81	993	65.111
XM_758231.1	987	1005.61	1419	249.986
XM_758232.1	480	287.787	263	161.899
XM_758233.1	1128	1115.25	255	40.5067
XM_758234.1	919	735.239	800	192.762
XM_758235.1	384	215.744	356	292.329
XM_758236.1	3129	3072.41	1602	92.3727
XM_758237.1	195	55.0426	162	521.407
XM_758238.1	120	15.829	170	1902.63
XM_758239.1	1062	1055.43	2240	375.991
XM_758240.1	1035	950.751	1297	241.676
XM_758241.1	3120	2899.09	870	53.164
XM_758242.1	645	491.913	25	9.00351
XM_758243.1	2580	2723.77	2097	136.392
XM_758244.1	546	371.191	1046	499.223
XM_758245.1	804	584.331	182	55.1789
XM_758246.1	573	448.902	892	352.025
XM_758247.1	922	757.032	216	50.5475
XM_758248.1	537	312.555	46	26.0731
XM_758249.1	201	59.0474	27	81.0071
XM_758250.1	294	132.883	145	193.312
XM_758251.1	315	151.497	486	568.32
XM_758252.1	3378	2647.65	2038	136.365
XM_758253.1	663	555.292	49	15.6327
XM_758254.1	954	717.794	323	79.7192
XM_758255.1	1449	1360.01	5167	673.065
XM_758256.1	2421	2085.75	1347	114.41
XM_758257.1	852	690.446	875	224.512
XM_758258.1	228	78.2723	136	307.816
XM_758259.1	747	521.201	860	292.317
XM_758260.1	603	380.511	541	251.878
XM_758261.1	3012	2159.33	175	14.3575
XM_758262.1	1881	1330.09	1259	167.689
XM_758263.1	1650	1057.52	863.183	144.602
XM_758264.1	1671	1152.9	880.528	135.304
XM_758265.1	1614	951.65	925.817	172.349
XM_758266.1	1614	968.189	660.472	120.852
XM_758267.1	1659	1021.31	300	52.0382
XM_758268.1	1662	1101.72	842	135.395
XM_758269.1	1344	901.374	871	171.188
XM_758270.1	930	715.894	535	132.393
XM_758271.1	1437	1054.25	820	137.794
XM_758272.1	1706	1598.28	1217	134.896
XM_758273.1	1584	1264.62	237	33.2008
XM_758274.1	1374	1126.89	3367.39	529.384
XM_758275.1	1356	1034.93	695.611	119.074
XM_758276.1	1653	1161.4	823	125.539
XM_758277.1	616	363.922	537	261.412
XM_758278.1	1475	999.58	567	100.491
XM_758279.1	3462	2233.57	479	37.9923
XM_758280.1	270	112.162	5	7.8974
XM_758281.1	264	107.116	5	8.26944
XM_758282.1	303	140.686	49	61.7027
XM_758283.1	360	169.814	127	132.492
XM_758284.1	1506	1254.1	462	65.2637
XM_758285.1	525	244.982	36	26.0333
XM_758286.1	1368	1334.25	697	92.5458
XM_758287.1	4062	2716.37	471	30.718
XM_758288.1	948	624.755	19	5.38771
XM_758289.1	861	506.521	198	69.2513
XM_758290.1	570	524.217	4486	1516.03
XM_758291.1	471	280.629	192	121.207
XM_758292.1	633	482.185	34	12.4918
XM_758293.1	1329	1023.58	472	81.6921
XM_758294.1	5160	3254.67	1210	65.8625
XM_758295.1	873	697.742	806	204.645
XM_758296.1	3036	1893.63	720	67.3592
XM_758297.1	539	309.969	660	377.212
XM_758298.1	374	174.661	700	710.007
XM_758299.1	1070	613.693	1678	484.396
XM_758300.1	1356	1274.14	6849	952.294
XM_758301.1	1353	860.541	1141	234.895
XM_758302.1	4569	3968.58	2203	98.3421
XM_758303.1	1624	1470.81	9357	1127.04
XM_758304.1	4308	3147.64	866	48.7408
XM_758305.1	366	199.349	443	393.685
XM_758306.1	2700	1809.18	389	38.0916
XM_758307.1	2211	1058.43	17	2.84543
XM_758308.1	1521	703.632	157	39.5289
XM_758309.1	777	350.955	248	125.187
XM_758310.1	3028	1898.4	535	49.9259
XM_758311.1	837	639.083	104	28.8294
XM_758312.1	2991	2266.72	2414	188.669
XM_758313.1	276	117.34	808	1219.9
XM_758314.1	1656	1369.22	758	98.0744
XM_758315.1	588	317.647	662	369.211
XM_758316.1	996	574.885	6	1.84897
XM_758317.1	672	267.661	143	94.6479
XM_758318.1	1134	795.031	484	107.85
XM_758319.1	1377	1060.21	162	27.0698
XM_758320.1	4275	3195.99	1540	85.3641
XM_758321.1	3134	2390.17	953	70.6356
XM_758322.1	4143	3184.14	2108	117.284
XM_758323.1	819	595.32	996	296.394
XM_758324.1	2463	2007.19	752	66.3728
XM_758325.1	1022	755.14	261	61.2313
XM_758326.1	2142	1291.95	30	4.11372
XM_758327.1	549	441.523	22349.2	8967.44
XM_758328.1	822	601.697	636	187.258
XM_758329.1	1791	1644.94	7444	801.708
XM_758330.1	3447	2436.86	696	50.5987
XM_758331.1	507	250.069	711	503.697
XM_758332.1	2040	2111.12	151	12.6714
XM_758333.1	2760	2869.44	1107	68.3456
XM_758334.1	822	604.76	655	191.875
XM_758335.1	1241	775.99	220	50.2258
XM_758336.1	2601	1858.01	95	9.05809
XM_758337.1	651	370.97	135	64.4697
XM_758338.1	1473	1010.36	166	29.1067
XM_758339.1	462	219.562	89	71.8114
XM_758340.1	465	283.724	48	29.9713
XM_758341.1	1542	977.24	135	24.4733
XM_758342.1	561	371.878	208	99.0885
XM_758343.1	2757	2019.24	418	36.6732
XM_758344.1	1149	839.391	307	64.7939
XM_758345.1	285	124.993	161	228.192
XM_758346.1	846	535.248	128	42.3658
XM_758347.1	1815	1748.32	6371	645.576
XM_758348.1	889	596.603	606	179.948
XM_758349.1	1389	1314.44	795	107.149
XM_758350.1	684	387.783	549	250.809
XM_758351.1	1875	1361.07	344	44.7754
XM_758352.1	1288	979.956	481	86.9558
XM_758353.1	408	206.755	185	158.517
XM_758354.1	861	631.607	1783	500.109
XM_758355.1	390	180.381	1168	1147.13
XM_758356.1	552	270.771	684	447.523
XM_758357.1	1176	605.138	99	28.9828
XM_758358.1	522	384.67	221	101.78
XM_758359.1	1077	861.159	986	202.84
XM_758360.1	1701	1241.5	861	122.862
XM_758361.1	849	544.003	335	109.095
XM_758362.1	351	185.186	10	9.56648
XM_758363.1	1749	1724.15	2193	225.332
XM_758364.1	273	114.773	91	140.463
XM_758365.1	2382	2453.43	4423	319.377
XM_758366.1	2151	1192.63	664	98.633
XM_758367.1	216	69.4481	859	2191.26
XM_758368.1	1402	1866.75	14158	1343.62
XM_758369.1	714	650.869	860	234.08
XM_758370.1	1398	1297.09	587	80.1732
XM_758371.1	516	354.141	265	132.565
XM_758372.1	869	651.278	399	108.534
XM_758373.1	690	530.151	767	256.304
XM_758374.1	989	739.287	1655	396.593
XM_758375.1	444	343.463	1629	840.237
XM_758376.1	480	247.061	184	131.939
XM_758377.1	3249	3161.97	1233	69.0822
XM_758378.1	3345	3181.95	13993	779.072
XM_758379.1	1056	840.172	714	150.553
XM_758380.1	636	488.433	1087	394.262
XM_758381.1	501	292.297	295	178.796
XM_758382.1	1161	876.985	630	127.265
XM_758383.1	939	574.163	202	62.327
XM_758384.1	354	167.06	48	50.9013
XM_758385.1	1215	1139.31	785	122.064
XM_758386.1	972	718.799	114	28.0969
XM_758387.1	3027	3242.54	3048	166.529
XM_758388.1	1575	659.497	59.0345	15.8582
XM_758389.1	1578	636.246	116.116	32.3315
XM_758390.1	672	294.302	290	174.568
XM_758391.1	1575	653.14	404.478	109.711
XM_758392.1	1566	625.988	169.512	47.9728
XM_758393.1	1386	1149.48	1114	171.69
XM_758394.1	1575	663.202	209.231	55.8909
XM_758395.1	1569	686.128	88.6895	22.8996
XM_758396.1	1578	635.241	23.9391	6.6762
XM_758397.1	933	682.635	66	17.1284
XM_758398.1	547	406.934	278	121.027
XM_758399.1	2421	2229.05	686	54.5212
XM_758400.1	5691	4373.85	114	4.61744
XM_758401.1	3750	3600.91	1306	64.2527
XM_758402.1	987	635.077	724	201.963
XM_758403.1	436	323.297	1179	646.059
XM_758404.1	1978	1732.78	718	73.4077
XM_758405.1	1970	1315.35	283.554	38.1904
XM_758406.1	378	210.691	113	95.015
XM_758407.1	276	117.34	2282	3445.32
XM_758408.1	1365	1584.87	1015	113.457
XM_758409.1	1380	1406.85	361	45.4589
XM_758410.1	840	612.644	1257	363.486
XM_758411.1	699	489.234	12	4.34535
XM_758412.1	2276	2880.57	3066	188.562
XM_758413.1	4218	5155.44	1722	59.1735
XM_758414.1	5091	4987.82	1648	58.5338
XM_758415.1	1411	1444.4	714	87.5731
XM_758416.1	642	390.924	18	8.15719
XM_758417.1	1035	999.415	1739	308.258
XM_758418.1	3090	2787.94	1096	69.6445
XM_758419.1	2157	1751.37	12.3384	1.24808
XM_758420.1	381	227.977	82	63.721
XM_758421.1	1072	767.366	1567	361.765
XM_758422.1	417	272.317	2553	1660.88
XM_758423.1	1815	1572.73	1407	158.489
XM_758424.1	777	495.932	864	308.64
XM_758425.1	2865	3227.81	1845	101.263
XM_758426.1	2376	2121.32	1494	124.769
XM_758427.1	5214	3773.53	508	23.8493
XM_758428.1	1875	1970.12	3012	270.846
XM_758429.1	3189	3377.05	232	12.1706
XM_758430.1	731	443.92	277.192	110.621
XM_758431.1	1184	1088.42	870.808	141.738
XM_758432.1	2808	1720.04	675	69.5224
XM_758433.1	1614	1441.03	32	3.93402
XM_758434.1	570	459.489	1490	574.476
XM_758435.1	1038	859.063	280	57.7422
XM_758436.1	876	531.578	1104	367.928
XM_758437.1	1566	1266.06	622	87.0353
XM_758438.1	410	176.225	1201	1207.36
XM_758439.1	615	395.262	113	50.647
XM_758440.1	842	575.551	96	29.5493
XM_758441.1	913	827.075	1250	267.747
XM_758442.1	1818	1190.17	568	84.5471
XM_758443.1	456	204.354	354	306.889
XM_758444.1	81	10.84	428	6994.79
XM_758445.1	1095	796.695	571	126.971
XM_758446.1	2714	2444.77	855	61.9567
XM_758447.1	1215	1073.27	823	135.847
XM_758448.1	1130	795.925	874	194.536
XM_758449.1	486	401.585	277	122.198
XM_758450.1	1361	1190.93	828	123.17
XM_758451.1	426	260.42	1418	964.634
XM_758452.1	2274	1559.74	1600	181.731
XM_758453.1	2678	2197.52	1202	96.9018
XM_758454.1	3219	2414.54	367	26.9272
XM_758455.1	549	493.841	14997	5379.94
XM_758456.1	1359	1077.53	761	125.117
XM_758457.1	348	219.86	61	49.1523
XM_758458.1	717	507.972	782	272.726
XM_758459.1	1188	800.137	275	60.8876
XM_758460.1	732	378.951	178	83.2142
XM_758461.1	2358	2054.45	111	9.57167
XM_758462.1	465	342.77	353	182.445
XM_758463.1	2697	3190.97	4275	237.341
XM_758464.1	1725	1684.27	1653	173.869
XM_758465.1	468	270.696	65	42.5395
XM_758466.1	522	426.716	481	199.694
XM_758467.1	2685	3208.78	1294	71.4422
XM_758468.1	369	298.428	1071	635.786
XM_758469.1	3183	3639.41	982	47.8015
XM_758470.1	1473	1229.29	1353	194.987
XM_758471.1	1470	1550.26	1234	141.017
XM_758472.1	1284	1350.75	987	129.45
XM_758473.1	3633	3515.92	428	21.5658
XM_758474.1	1632	1858.64	830	79.1123
XM_758475.1	483	445.343	768	305.511
XM_758476.1	1494	1621.24	165	18.0301
XM_758477.1	525	392.92	1308	589.745
XM_758478.1	1638	2073.78	10613	906.641
XM_758479.1	1624	1879.22	995	93.8008
XM_758480.1	1542	1486.77	2998	357.231
XM_758481.1	1911	1947.5	1749	159.101
XM_758482.1	1023	773.372	1051	240.754
XM_758483.1	912	768.749	147	33.8761
XM_758484.1	2674	2411.49	3794	278.722
XM_758485.1	357	190.863	147	136.444
XM_758486.1	798	331.023	263	140.753
XM_758487.1	2208	1442.07	227	27.8869
XM_758488.1	2436	1167.06	43	6.52734
XM_758489.1	1138	733.402	308	74.3994
XM_758490.1	4134	2885.14	259	15.9035
XM_758491.1	1974	1080.97	157	25.7304
XM_758492.1	1344	916.385	431	83.322
XM_758493.1	2682	2603.1	5608	381.661
XM_758494.1	975	625.836	803	227.308
XM_758495.1	2371	1558.63	767	87.1789
XM_758496.1	1785	1181.14	371	55.646
XM_758497.1	1689	1408.89	218.968	27.5337
XM_758498.1	1536	1214.75	3.03161	0.442125
XM_758499.1	579	347.591	440	224.256
XM_758500.1	3656	2425.77	6141	448.487
XM_758501.1	305	142.525	489	607.824
XM_758502.1	1950	1122.43	674	106.38
XM_758503.1	306	143.451	129	159.311
XM_758504.1	1638	1449.86	1425	174.12
XM_758505.1	285	124.993	83	117.639
XM_758506.1	1883	1028.79	664	114.341
XM_758507.1	1650	1117.62	37	5.86499
XM_758508.1	2862	2183.18	1731	140.465
XM_758509.1	465	254.886	440	305.82
XM_758510.1	973	566.471	278	86.9416
XM_758511.1	1548	1306.79	1949	264.221
XM_758512.1	678	597.464	1522	451.298
XM_758513.1	1074	747.149	2737	648.975
XM_758514.1	1380	1355.46	1083	141.547
XM_758515.1	1374	1214.6	1627	237.309
XM_758516.1	924	557.128	61	19.397
XM_758517.1	918	501.528	14	4.94531
XM_758518.1	744	415.002	286	122.089
XM_758519.1	372	192.016	109	100.566
XM_758520.1	513	263.791	1073	720.609
XM_758521.1	1209	829.703	224	47.8284
XM_758522.1	1693	1378	3676	472.593
XM_758523.1	423	329.375	220	118.329
XM_758524.1	411	296.763	116	69.2481
XM_758525.1	4743	2816.59	1846	116.11
XM_758526.1	5367	3301.09	265	14.2216
XM_758527.1	876	639.76	1709	473.244
XM_758528.1	1420	1258.65	4691	660.271
XM_758529.1	1330	1064.93	1588	264.174
XM_758530.1	897	535.552	253	83.691
XM_758531.1	582	228.466	184	142.678
XM_758532.1	4530	3248.59	557	30.3753
XM_758533.1	1419	1199.96	507	74.852
XM_758534.1	372	176.032	442	444.828
XM_758535.1	405	177.833	71	70.7304
XM_758536.1	1104	706.443	521	130.653
XM_758537.1	915	816.945	1341	290.801
XM_758538.1	461	255.037	1551	1077.38
XM_758539.1	448	241.127	1562	1147.61
XM_758540.1	441	218.006	757	615.159
XM_758541.1	492	270.457	58	37.9918
XM_758542.1	1500	871.321	674	137.038
XM_758543.1	3471	2404.55	913	67.2664
XM_758544.1	504	300.71	541	318.72
XM_758545.1	770	591.455	492	147.368
XM_758546.1	423	169.938	1106	1152.99
XM_758547.1	1968	1793.74	2315	228.64
XM_758548.1	2487	1771.31	226	22.6034
XM_758549.1	1347	730.853	130.912	31.7328
XM_758550.1	1410	820.974	127.63	27.5413
XM_758551.1	1680	1107.27	233.271	37.3224
XM_758552.1	1437	877.724	2.08554	0.42094
XM_758553.1	621	262.978	5.0634	3.41101
XM_758554.1	1320	936.055	1300	246.038
XM_758555.1	1884	1393.46	67	8.51805
XM_758556.1	1740	1240.48	32	4.57004
XM_758557.1	1527	1220.07	3	0.435608
XM_758558.1	1356	1186.2	0	0
XM_758559.1	1194	807.742	2	0.438649
XM_758560.1	1146	665.893	16	4.25673
XM_758561.1	1310	841.628	15	3.15741
XM_758562.1	1857	1132.24	307	48.0353
XM_758563.1	4542	2996.18	2069.08	122.34
XM_758564.1	3300	1702.36	108	11.2391
XM_758565.1	2010	1214.1	294	42.8997
XM_758566.1	900	477.921	61	22.6117
XM_758567.1	726	368.424	543	261.103
XM_758568.1	1689	1000.86	167	29.5598
XM_758569.1	2910	2239.97	663	52.4362
XM_758570.1	1689	942.834	57	10.7103
XM_758571.1	2106	1476.39	631	75.7164
XM_758572.1	2967	1889.16	1021	95.7452
XM_758573.1	1191	1033.14	1257	215.544
XM_758574.1	711	450.467	488	191.919
XM_758575.1	1305	1040.7	2745	467.28
XM_758576.1	753	486.424	1344	489.491
XM_758577.1	1199	1207.54	776	113.847
XM_758578.1	955	767.982	975	224.913
XM_758579.1	382	214.478	530	437.778
XM_758580.1	763	411.474	533	229.48
XM_758581.1	2301	1991.96	1282	114.017
XM_758582.1	731	434.155	893	364.391
XM_758583.1	828	475.509	303	112.887
XM_758584.1	1084	658.925	252	67.7525
XM_758585.1	648	442.119	521	208.765
XM_758586.1	3258	2625.91	3594	242.47
XM_758587.1	741	428.529	759	313.778
XM_758588.1	761	512.463	366	126.526
XM_758590.1	1374	1075.04	1556	256.417
XM_758591.1	534	298.038	175	104.022
XM_758592.1	534	325.062	3132	1706.93
XM_758593.1	1443	1238.85	5993	857.01
XM_758594.1	650	317.909	87	48.4816
XM_758595.1	459	281.181	106	66.7851
XM_758596.1	1812	944.762	246	46.1289
XM_758597.1	1206	1004.15	637	112.383
XM_758598.1	282	122.464	259	374.674
XM_758599.1	2771	2089.41	1957	165.931
XM_758600.1	1386	985.739	62	11.1427
XM_758601.1	672	400.953	507	224.014
XM_758602.1	602	287.926	417	256.575
XM_758603.1	735	406.963	163	70.9566
XM_758604.1	603	386.268	241	110.532
XM_758605.1	1251	949.417	370	69.0407
XM_758606.1	1571	875.485	387	78.311
XM_758607.1	1464	787.802	248	55.7693
XM_758608.1	1971	1952.51	6008	545.125
XM_758609.1	3591	2679.11	702	46.4201
XM_758610.1	702	394.011	201	90.375
XM_758611.1	687	377.035	210	98.673
XM_758612.1	219	71.6608	29	71.693
XM_758613.1	465	367.835	2842	1368.77
XM_758614.1	2895	2318.71	1227	93.7474
XM_758615.1	1140	841.892	758	159.505
XM_758616.1	858	745.003	408	97.0202
XM_758617.1	2183	1868.88	1667	158.021
XM_758618.1	447	221.249	1268	1015.31
XM_758619.1	168	38.0924	113	525.534
XM_758620.1	1104	973.901	1082	196.822
XM_758621.1	1237	835.268	215	45.6009
XM_758622.1	2358	1682.93	329	34.633
XM_758623.1	2808	2243.58	457	36.0857
XM_758624.1	624	452.355	429	168.011
XM_758625.1	786	564.848	1025	321.479
XM_758626.1	2172	1645.35	22.6616	2.44002
XM_758627.1	597	420.89	99	41.6703
XM_758628.1	651	481.29	3	1.10427
XM_758629.1	1071	713.67	24	5.95764
XM_758630.1	2538	2032.21	1247	108.707
XM_758631.1	1695	1532.6	1720	198.82
XM_758632.1	753	617.165	1234	354.221
XM_758633.1	1107	816.656	618	134.063
XM_758634.1	330	165.349	442	473.567
XM_758635.1	1344	1598.21	3775	418.449
XM_758636.1	399	235.089	602	453.655
XM_758637.1	669	531.267	143	47.6852
XM_758638.1	867	607.682	76	22.1563
XM_758639.1	924	719.727	71	17.4763
XM_758640.1	807	405.36	6	2.62223
XM_758641.1	867	608.601	25	7.27726
XM_758642.1	822	659.774	129	34.6382
XM_758643.1	1080	842.524	19	3.99514
XM_758644.1	729	479.665	83	30.655
XM_758645.1	855	588.264	18	5.42076
XM_758646.1	447	238.495	234	173.819
XM_758647.1	1329	1813.99	678	66.2148
XM_758648.1	2187	1904.35	478	44.4673
XM_758649.1	880	508.244	1371	477.887
XM_758650.1	468	306.211	334	193.235
XM_758651.1	357	244.319	359	260.314
XM_758652.1	504	384.9	1278	588.225
XM_758653.1	1191	922.017	741	142.377
XM_758654.1	1455	1075.11	799	131.66
XM_758655.1	982	687.715	2952.15	760.483
XM_758656.1	597	455.708	279	108.462
XM_758657.1	711	477.386	18	6.6798
XM_758658.1	1197	1088.36	1632	265.649
XM_758659.1	1113	1001.66	323.853	57.2781
XM_758660.1	1021	702.856	367	92.5039
XM_758661.1	1065	904.93	1087	212.802
XM_758662.1	1185	1022.27	354	61.3474
XM_758663.1	345	214.521	87	71.8473
XM_758664.1	1386	1600.73	276	30.5457
XM_758665.1	213	67.4065	6	15.7692
XM_758666.1	1434	1510.58	5477	642.333
XM_758667.1	894	778.494	3992	908.439
XM_758668.1	1827	1223.34	29	4.19965
XM_758669.1	1991	1427.97	47	5.83093
XM_758670.1	1764	1172.53	274	41.3986
XM_758671.1	1383	1152.61	2294	352.591
XM_758672.1	534	271.138	208	135.904
XM_758673.1	444	239.224	532	393.973
XM_758674.1	357	190.863	156	144.798
XM_758675.1	510	212.048	534	446.136
XM_758676.1	924	581.769	828	252.139
XM_758677.1	1128	661.147	504	135.05
XM_758678.1	702	459.001	122	47.0876
XM_758679.1	1578	1184.18	652	97.5414
XM_758680.1	1242	816.326	467	101.348
XM_758681.1	1536	1194.23	174	25.8121
XM_758682.1	6273	4947.99	838	30.0037
XM_758683.1	1848	1344.74	575	75.7514
XM_758684.1	481	329.665	1311	704.514
XM_758685.1	453	237.14	128	95.6236
XM_758686.1	1113	716.716	367	90.715
XM_758687.1	3915	3667.78	141.511	6.83516
XM_758688.1	930	458.098	287	110.99
XM_758689.1	1653	1218.75	176	25.5834
XM_758690.1	1001	611.457	623	180.502
XM_758691.1	1131	580.182	257	78.4746
XM_758692.1	564	455.285	9867	3839.39
XM_758693.1	987	666.762	669	177.752
XM_758694.1	1296	892.148	752	149.328
XM_758695.1	7311	3804.71	1017	47.3544
XM_758696.1	542	244.369	24	17.3991
XM_758697.1	477	284.041	109	67.9837
XM_758698.1	1209	850.074	164	34.178
XM_758699.1	1518	889.286	158	31.4758
XM_758700.1	1701	1047.31	892	150.886
XM_758701.1	1617	1088.55	716	116.526
XM_758702.1	260	103.791	89	151.912
XM_758703.1	557	268.69	583	384.395
XM_758704.1	351	187.975	2118	1996.12
XM_758705.1	627	349.433	589	298.615
XM_758706.1	1545	1161.68	37	5.64257
XM_758707.1	2127	1512.23	951	111.409
XM_758708.1	3087	2244.05	1526	120.471
XM_758709.1	873	542.651	262	85.5345
XM_758710.1	726	482.377	66	24.2392
XM_758711.1	1235	710.875	294	73.2681
XM_758712.1	1041	588.006	33	9.94243
XM_758713.1	973	453.802	259	101.11
XM_758714.1	2739	2066.16	5971	511.968
XM_758715.1	1314	1021.94	938	162.607
XM_758716.1	2958	2297.42	1971	151.987
XM_758717.1	3561	3352.65	4896	258.71
XM_758718.1	720	349.965	91	46.0656
XM_758719.1	999	498.819	476	169.053
XM_758720.1	1440	1118.11	21	3.32734
XM_758721.1	1095	836.914	2055	435.002
XM_758722.1	237	85.3759	785	1628.9
XM_758723.1	204	61.2574	11765	34024.7
XM_758724.1	3696	3190.89	2770	153.79
XM_758725.1	1905	1356.4	155	20.2444
XM_758726.1	1791	1167.06	85	12.9028
XM_758727.1	2427	1150.21	219	33.7308
XM_758728.1	750	577.462	1038	318.445
XM_758729.1	1158	1165.16	2340	355.789
XM_758730.1	600	306.606	306	176.808
XM_758731.1	776	398.47	926	411.695
XM_758732.1	225	76.0421	125	291.217
XM_758733.1	846	479.115	350	129.416
XM_758734.1	333	168.247	214	225.334
XM_758735.1	1068	727.195	303	73.8163
XM_758736.1	1077	920.947	270	51.9385
XM_758737.1	783	631.987	497	139.318
XM_758738.1	1395	1449.35	250	30.5581
XM_758739.1	522	235.92	99	74.3413
XM_758740.1	567	253.886	74	51.6361
XM_758741.1	858	774.763	106	24.238
XM_758742.1	594	314.687	137	77.1262
XM_758743.1	989	781.073	674	152.872
XM_758744.1	704	429.614	81	33.4016
XM_758745.1	351	173.46	815	832.376
XM_758746.1	1413	1091.16	691	112.189
XM_758747.1	1881	1583.08	434	48.5675
XM_758748.1	2108	1386.19	149	19.0425
XM_758749.1	591	361.246	81	39.723
XM_758750.1	306	143.451	54	66.6883
XM_758751.1	4308	4244.15	394	16.4462
XM_758752.1	1155	741.226	239	57.1226
XM_758753.1	3741	3022.78	315	18.4614
XM_758754.1	813	567.813	355	110.76
XM_758755.1	2773	2068.86	1252	107.21
XM_758756.1	4116	2539.18	567	39.5594
XM_758757.1	846	652.254	222	60.2971
XM_758758.1	3264	2784.56	2005	127.561
XM_758759.1	431	191.271	1063	984.566
XM_758760.1	2916	2304.24	2826	217.272
XM_758761.1	2046	2687.93	3062	201.812
XM_758762.1	1305	848.062	1171	244.619
XM_758763.1	549	311.318	9	5.12151
XM_758764.1	1401	1321.67	1265	169.562
XM_758765.1	147	26.8381	13	85.8128
XM_758766.1	1299	843.429	767	161.104
XM_758767.1	488	292.35	260	157.554
XM_758768.1	2382	1416.29	580	72.5496
XM_758769.1	5148	4220.58	1151	48.313
XM_758770.1	2766	2471.58	433	31.0366
XM_758771.1	1479	1358.35	1013	132.117
XM_758772.1	1046	1076.55	2172	357.426
XM_758773.1	3429	2627.96	390	26.2909
XM_758774.1	2655	1845.07	562	53.9615
XM_758775.1	1008	881.18	755	151.79
XM_758776.1	1089	752.841	740	174.136
XM_758777.1	597	373.276	193	91.5983
XM_758778.1	938	671.854	779	205.411
XM_758779.1	634	463.667	86	32.8588
XM_758780.1	348	189.856	2144	2000.6
XM_758781.1	1222	1151.63	4460	686.095
XM_758782.1	984	605.731	72	21.0578
XM_758783.1	4290	4713.09	9570	359.722
XM_758784.1	1164	936.481	574	108.586
XM_758785.1	1087	775.525	387	88.4048
XM_758786.1	1494	1464.86	1467	177.417
XM_758787.1	2451	2216.22	466	37.2506
XM_758788.1	2202	1824.42	430	41.7547
XM_758789.1	2592	1968.29	54	4.86032
XM_758790.1	1698	1457.57	1505	182.922
XM_758791.1	1035	1064.84	476	79.1925
XM_758792.1	627	445.699	1132	449.951
XM_758793.1	2067	1787.58	1563	154.901
XM_758794.1	1950	1291.57	189	25.9241
XM_758795.1	1407	1132.87	431	67.3999
XM_758796.1	663	444.596	63	25.1036
XM_758797.1	2070	1698.84	12	1.25138
XM_758798.1	1515	1453.19	307	37.4262
XM_758799.1	1031	782.779	1010.03	228.589
XM_758800.1	2916	2607.97	2856.97	194.072
XM_758801.1	414	212.666	212	176.603
XM_758802.1	2898	2701.58	1496	98.1011
XM_758803.1	1149	795.506	1667	371.238
XM_758804.1	276	117.34	35	52.8423
XM_758805.1	2748	2863.35	2645	163.648
XM_758806.1	1668	1833.75	746	72.0707
XM_758807.1	2235	2382.64	1266	94.1318
XM_758808.1	763	407.062	3824	1664.25
XM_758809.1	1020	929.626	518	98.7147
XM_758810.1	2419	2340.12	2948	223.177
XM_758811.1	714	702.248	460	116.045
XM_758812.1	1686	2152.03	1483	122.082
XM_758813.1	726	603.045	289	84.9002
XM_758814.1	1599	1381.3	851	109.144
XM_758815.1	1065	1285.12	425	58.5874
XM_758816.1	393	207.585	32	27.3095
XM_758817.1	7218	5964.49	2860	84.9479
XM_758818.1	852	639.987	9	2.49133
XM_758819.1	606	430.032	2033	837.523
XM_758820.1	846	427.273	507	210.215
XM_758821.1	882	398.587	228	101.338
XM_758822.1	3394	2268.82	936	73.0864
XM_758823.1	306	143.451	111	137.082
XM_758824.1	686	374.778	3437	1624.67
XM_758825.1	621	464.949	259	98.6857
XM_758826.1	1290	949.532	602	112.317
XM_758827.1	1432	1257.08	846	119.225
XM_758828.1	1110	684.381	348	90.0828
XM_758829.1	3606	2599.21	468	31.898
XM_758830.1	1112	1044.3	5113	867.386
XM_758831.1	720	445.561	911	362.219
XM_758832.1	1294	988.572	179	32.0778
XM_758833.1	717	787.707	3498	786.711
XM_758834.1	1173	833.81	880	186.972
XM_758835.1	1281	1163.56	232	35.3232
XM_758836.1	1269	941.389	1163	218.862
XM_758837.1	2343	2558.63	1713	118.607
XM_758838.1	117	14.9629	208	2462.67
XM_758839.1	2784	2308.77	1376	105.584
XM_758840.1	330	165.349	131	140.356
XM_758841.1	537	357.063	323	160.257
XM_758842.1	1398	1074.97	279	45.9798
XM_758843.1	522	272.175	142	92.4275
XM_758844.1	1419	1072.83	467	77.1166
XM_758845.1	557	379.024	586	273.899
XM_758846.1	168	38.0924	221	1027.81
XM_758847.1	2796	2550.53	816	56.6788
XM_758848.1	1659	1758.58	427	43.0156
XM_758849.1	1062	641.164	202	55.8139
XM_758850.1	587	427.013	1208	501.171
XM_758851.1	763	439.267	4569	1842.69
XM_758852.1	1377	746.744	183	43.415
XM_758853.1	2565	2399.46	3864	285.288
XM_758854.1	423	220.632	43	34.5271
XM_758855.1	879	863.1	5492	1127.27
XM_758856.1	717	591.808	23	6.88505
XM_758857.1	667	531.103	382	127.422
XM_758858.1	2328	1940.42	20467	1868.61
XM_758859.1	719	612.383	769	222.466
XM_758860.1	1074	1156.44	1665	255.066
XM_758861.1	783	627.483	331	93.4516
XM_758862.1	378	196.669	71	63.9561
XM_758863.1	411	326.388	174	94.4444
XM_758864.1	384	260.674	2530	1719.42
XM_758865.1	2649	2155.57	888	72.9813
XM_758866.1	795	620.819	188	53.6479
XM_758867.1	1164	1048.91	840	141.874
XM_758868.1	861	748.748	243	57.4951
XM_758869.1	1524	1184.27	57	8.52676
XM_758870.1	2439	1752.98	10	1.01061
XM_758871.1	1431	1060.54	888	148.336
XM_758872.1	1914	1278.19	440	60.9842
XM_758873.1	363	196.529	27	24.3387
XM_758874.1	480	295.274	250	149.995
XM_758875.1	765	475.673	147	54.7481
XM_758876.1	3708	3393.73	815	42.5442
XM_758877.1	1326	949.857	2	0.37302
XM_758878.1	294	132.883	4	5.33273
XM_758879.1	1497	1084.55	12	1.96016
XM_758880.1	758	505.007	114	39.9915
XM_758881.1	1935	1504.86	246	28.9601
XM_758882.1	3573	3771.5	2743	128.846
XM_758883.1	922	688.561	2149	552.91
XM_758884.1	960	844.842	2353	493.409
XM_758885.1	1650	1672.23	1282	135.817
[truncated: 2,754 more rows]

## Sheet: Piroplasm 2_abundance.tsv
target_id	length	eff_length	est_counts	tpm
[truncated: 4,061 more rows]

[truncated: 1 more sheets: Piroplasm 3_abundance.tsv]
