# Supplementary material for: Comparative Transcriptomics of the Bovine Apicomplexan Parasite Theileria parva Developmental Stages Reveals Massive Gene Expression Variation and Potential Vaccine Antigens
Source: Front Vet Sci. 2020 Jun 9;7:287. doi: 10.3389/fvets.2020.00287 (PMC7296165; doi:10.3389/fvets.2020.00287)
Supplement: Supplementary Data File 3 — List of genes associated to the GO term and KEGG term. [file Data_Sheet_3.xlsx]

## Sheet: FUNCTION OF UP-REGULATED GENES
MOLECULAR FUNCTION OF UP-REGULATED GENES IN THE PIROPLASM
Category	Term	Count	PValue	Genes	Fold Enrichment	Bonferroni	Benjamini	FDR
GOTERM_MF_ALL	GO:0004672~protein kinase activity	31	0.00449083	TP02_0178, TP03_0140, TP02_0139, TP01_0359, TP02_0697, TP04_0518, TP04_0551, TP01_0880, TP01_0983, TP04_0678, TP02_0399, TP01_0728, TP01_0781, TP04_0122, TP03_0315, TP04_0818, TP01_1167, TP04_0446, TP01_1105, TP01_1028, TP03_0701, TP02_0833, TP03_0047, TP01_1073, TP01_0678, TP01_0943, TP04_0848, TP01_0303, TP04_0645, TP02_0191, TP02_0462	1.51992	0.834018	0.834018	6.0828
GOTERM_MF_ALL	GO:0016773~phosphotransferase activity, alcohol group as acceptor	39	0.0148167	TP02_0178, TP03_0140, TP02_0139, TP01_0359, TP04_0387, TP02_0697, TP02_0054, TP01_0811, TP04_0518, TP01_0880, TP04_0551, TP01_0983, TP04_0678, TP01_0781, TP02_0399, TP01_0728, TP04_0122, TP01_0935, TP03_0315, TP04_0818, TP01_1167, TP01_0045, TP04_0446, TP01_1105, TP01_1028, TP03_0701, TP02_0833, TP02_0475, TP01_1124, TP03_0047, TP01_1073, TP01_0678, TP01_0943, TP04_0848, TP01_0303, TP02_0191, TP0…	1.36209	0.99741	0.949108	18.7903
GOTERM_MF_ALL	GO:0016301~kinase activity	50	0.0243078	TP02_0655, TP02_0697, TP04_0387, TP02_0054, TP04_0518, TP02_0656, TP02_0657, TP01_0880, TP02_0658, TP04_0551, TP01_0881, TP01_0983, TP01_0781, TP02_0399, TP01_0935, TP04_0818, TP01_1167, TP02_0833, TP01_1124, TP03_0047, TP01_0820, TP04_0571, TP01_0925, TP02_0462, TP02_0178, TP03_0140, TP02_0139, TP01_0359, TP01_0811, TP04_0678, TP02_0576, TP01_0728, TP04_0122, TP03_0315, TP01_0100, TP01_0045, TP0…	1.27477	0.999946	0.962103	29.044
GOTERM_MF_ALL	GO:0003735~structural constituent of ribosome	61	0.0320195	TP02_0949, TP01_0682, TP02_0323, TP04_0388, TP02_0803, TP02_0801, TP04_0309, TP02_0064, TP04_0394, TP03_0012, TP02_0298, TP03_0163, TP04_0421, TP01_0066, TP04_0277, TP04_0238, TP03_0566, TP01_0892, TP04_0711, TP03_0428, TP02_0720, TP01_0924, TP03_0860, TP04_0282, TP01_0560, TP01_1051, TP03_0106, TP04_0481, TP02_0487, TP04_0266, TP02_0283, TP03_0611, TP01_0964, TP03_0716, TP01_0413, TP02_0305, TP0…	1.22459	0.999998	0.961078	36.4759
GOTERM_MF_ALL	GO:0015399~primary active transmembrane transporter activity	17	0.0394678	TP02_0488, TP01_0201, TP02_0017, TP02_0016, TP01_0929, TP03_0033, TP04_0021, TP02_0940, TP03_0370, TP03_0853, TP03_0007, TP01_0951, TP02_0737, TP04_0914, TP01_0011, TP02_0445, TP03_0864	1.54794	1	0.959779	42.962
GOTERM_MF_ALL	GO:0015405~P-P-bond-hydrolysis-driven transmembrane transporter activity	17	0.0394678	TP02_0488, TP01_0201, TP02_0017, TP02_0016, TP01_0929, TP03_0033, TP04_0021, TP02_0940, TP03_0370, TP03_0853, TP03_0007, TP01_0951, TP02_0737, TP04_0914, TP01_0011, TP02_0445, TP03_0864	1.54794	1	0.959779	42.962
GOTERM_MF_ALL	GO:0008234~cysteine-type peptidase activity	16	0.0413884	TP04_0173, TP02_0097, TP02_0111, TP02_0099, TP02_0098, TP03_0675, TP04_0767, TP04_0664, TP03_0357, TP04_0598, TP03_0282, TP03_0283, TP03_0284, TP03_0285, TP03_0280, TP03_0281	1.56895	1	0.93985	44.5318
GOTERM_MF_ALL	GO:0005198~structural molecule activity	65	0.0490961	TP02_0360, TP02_0949, TP01_0682, TP02_0323, TP02_0326, TP04_0388, TP02_0803, TP02_0801, TP04_0309, TP02_0064, TP04_0394, TP03_0012, TP02_0298, TP03_0163, TP04_0421, TP01_0066, TP04_0277, TP04_0238, TP03_0566, TP01_0892, TP04_0711, TP03_0428, TP02_0720, TP01_0924, TP03_0860, TP04_0282, TP01_0560, TP01_1051, TP03_0106, TP04_0481, TP02_0487, TP04_0266, TP02_0283, TP03_0611, TP01_0964, TP03_0716, TP0…	1.19224	1	0.943273	50.4368
GOTERM_MF_ALL	GO:0016772~transferase activity, transferring phosphorus-containing groups	74	0.0609949	TP02_0655, TP04_0461, TP02_0118, TP02_0798, TP04_0387, TP02_0697, TP03_0199, TP02_0054, TP02_0656, TP04_0518, TP02_0657, TP03_0631, TP04_0551, TP02_0658, TP01_0880, TP01_0881, TP03_0057, TP01_0983, TP01_0029, TP02_0399, TP01_0781, TP01_0935, TP04_0048, TP04_0911, TP04_0818, TP02_0352, TP01_1167, TP02_0837, TP02_0833, TP01_1124, TP01_0225, TP02_0830, TP03_0047, TP01_0994, TP01_0820, TP04_0571, TP0…	1.16461	1	0.956667	58.4176
GOTERM_MF_ALL	GO:0008270~zinc ion binding	44	0.0644662	TP01_1110, TP02_0205, TP03_0750, TP01_0373, TP01_0836, TP01_0837, TP02_0636, TP01_1214, TP01_0812, TP02_0261, TP04_0515, TP03_0376, TP02_0237, TP04_0573, TP01_1187, TP04_0753, TP02_0615, TP01_0478, TP04_0326, TP01_1168, TP04_0272, TP03_0460, TP01_0459, TP02_0510, TP01_0128, TP04_0459, TP02_0182, TP01_1166, TP04_0895, TP02_0334, TP04_0357, TP01_0697, TP04_0472, TP04_0879, TP01_1022, TP01_0858, TP0…	1.23275	1	0.947884	60.5104
GOTERM_MF_ALL	GO:0003743~translation initiation factor activity	19	0.069512	TP03_0155, TP02_0333, TP02_0678, TP02_0307, TP01_0235, TP03_0718, TP04_0444, TP02_0303, TP01_0853, TP02_0436, TP02_0247, TP01_0630, TP04_0396, TP02_0376, TP01_0765, TP02_0735, TP04_0739, TP01_0597, TP01_0707	1.42475	1	0.943563	63.3786
GOTERM_MF_ALL	GO:0022804~active transmembrane transporter activity	19	0.069512	TP02_0488, TP01_0201, TP02_0500, TP02_0017, TP02_0016, TP01_0929, TP03_0033, TP04_0021, TP02_0940, TP03_0370, TP03_0853, TP03_0007, TP03_0369, TP01_0951, TP02_0737, TP04_0914, TP01_0011, TP02_0445, TP03_0864	1.42475	1	0.943563	63.3786
GOTERM_MF_ALL	GO:0003676~nucleic acid binding	167	0.071955	TP01_0841, TP03_0433, TP03_0432, TP01_0374, TP01_0842, TP04_0753, TP04_0751, TP03_0830, TP02_0807, TP01_1009, TP02_0456, TP03_0236, TP01_0366, TP01_0852, TP01_0851, TP02_0471, TP04_0421, TP04_0892, TP03_0088, TP04_0566, TP04_0043, TP01_0826, TP01_0858, TP02_0067, TP01_0163, TP04_0562, TP01_0856, TP03_0565, TP03_0429, TP03_0373, TP01_0992, TP01_0853, TP04_0233, TP02_0264, TP04_0241, TP04_0821, TP0…	1.08616	1	0.933374	64.6966
GOTERM_MF_ALL	GO:0042626~ATPase activity, coupled to transmembrane movement of substances	15	0.0902954	TP02_0488, TP01_0201, TP02_0017, TP02_0016, TP01_0929, TP03_0033, TP04_0021, TP02_0940, TP03_0853, TP03_0007, TP02_0737, TP04_0914, TP01_0011, TP02_0445, TP03_0864	1.47089	1	0.957003	73.2731
GOTERM_MF_ALL	GO:0043167~ion binding	94	0.0930374	TP01_1110, TP01_0373, TP03_0736, TP02_0697, TP01_0836, TP01_1214, TP01_0837, TP02_0261, TP04_0518, TP01_0983, TP04_0515, TP03_0376, TP02_0399, TP04_0753, TP02_0615, TP01_0478, TP02_0257, TP01_0476, TP02_0396, TP01_1168, TP01_0024, TP03_0162, TP01_0128, TP04_0148, TP02_0510, TP04_0459, TP04_0610, TP01_1166, TP04_0895, TP02_0934, TP02_0372, TP01_0697, TP04_0472, TP01_0858, TP02_0068, TP04_0770, TP0…	1.1199	1	0.950075	74.3746

## Sheet: FUNCTION OF DOWN-REGULATED GENE
MOLECULAR FUNCTION OF DOWN-REGULATED GENES IN SCHIZONT
Category	Term	Count	PValue	Genes	Fold Enrichment	Bonferroni	Benjamini	FDR
GOTERM_MF_ALL	GO:0004812~aminoacyl-tRNA ligase activity	27	0.000221337	TP01_0518, TP02_0322, TP04_0367, TP01_1212, TP04_0389, TP01_0957, TP03_0065, TP01_0727, TP01_0760, TP01_1004, TP03_0137, TP04_0776, TP02_0310, TP01_1024, TP04_0470, TP02_0167, TP01_0166, TP03_0387, TP01_0161, TP04_0592, TP04_0871, TP01_0460, TP04_0572, TP03_0416, TP04_0622, TP02_0541, TP02_0746	1.75494	0.100803	0.100803	0.316438
GOTERM_MF_ALL	GO:0016876~ligase activity, forming aminoacyl-tRNA and related compounds	27	0.000221337	TP01_0518, TP02_0322, TP04_0367, TP01_1212, TP04_0389, TP01_0957, TP03_0065, TP01_0727, TP01_0760, TP01_1004, TP03_0137, TP04_0776, TP02_0310, TP01_1024, TP04_0470, TP02_0167, TP01_0166, TP03_0387, TP01_0161, TP04_0592, TP04_0871, TP01_0460, TP04_0572, TP03_0416, TP04_0622, TP02_0541, TP02_0746	1.75494	0.100803	0.100803	0.316438
GOTERM_MF_ALL	GO:0016875~ligase activity, forming carbon-oxygen bonds	27	0.000221337	TP01_0518, TP02_0322, TP04_0367, TP01_1212, TP04_0389, TP01_0957, TP03_0065, TP01_0727, TP01_0760, TP01_1004, TP03_0137, TP04_0776, TP02_0310, TP01_1024, TP04_0470, TP02_0167, TP01_0166, TP03_0387, TP01_0161, TP04_0592, TP04_0871, TP01_0460, TP04_0572, TP03_0416, TP04_0622, TP02_0541, TP02_0746	1.75494	0.100803	0.100803	0.316438
GOTERM_MF_ALL	GO:0016491~oxidoreductase activity	50	0.00042122	TP01_0683, TP04_0347, TP03_0730, TP01_0177, TP01_0471, TP03_0110, TP04_0913, TP03_0528, TP04_0208, TP03_0230, TP04_0719, TP01_0224, TP04_0141, TP02_0667, TP01_0657, TP04_0036, TP04_0383, TP03_0672, TP02_0171, TP04_0620, TP03_0227, TP03_0092, TP02_0206, TP03_0715, TP01_0210, TP03_0594, TP02_0869, TP03_0758, TP02_0035, TP04_0883, TP01_0151, TP01_1196, TP01_0956, TP01_0959, TP04_0025, TP04_0080, TP0…	1.45828	0.183091	0.09617	0.601403
GOTERM_MF_ALL	GO:0032559~adenyl ribonucleotide binding	152	0.00580339	TP02_0361, TP01_1212, TP04_0614, TP03_0013, TP01_1004, TP02_0351, TP01_1122, TP03_0569, TP03_0425, TP02_0664, TP01_1125, TP02_0167, TP02_0937, TP01_0166, TP01_0824, TP01_0822, TP01_0460, TP04_0572, TP01_1097, TP02_0172, TP02_0467, TP04_0622, TP04_0139, TP03_0142, TP04_0174, TP04_0364, TP01_0518, TP01_0965, TP04_0367, TP01_0866, TP02_0771, TP01_0252, TP02_0772, TP01_0666, TP01_0456, TP02_0577, TP0…	1.15648	0.938808	0.605938	7.99557
GOTERM_MF_ALL	GO:0030554~adenyl nucleotide binding	152	0.00687816	TP02_0361, TP01_1212, TP04_0614, TP03_0013, TP01_1004, TP02_0351, TP01_1122, TP03_0569, TP03_0425, TP02_0664, TP01_1125, TP02_0167, TP02_0937, TP01_0166, TP01_0824, TP01_0822, TP01_0460, TP04_0572, TP01_1097, TP02_0172, TP02_0467, TP04_0622, TP04_0139, TP03_0142, TP04_0174, TP04_0364, TP01_0518, TP01_0965, TP04_0367, TP01_0866, TP02_0771, TP01_0252, TP02_0772, TP01_0666, TP01_0456, TP02_0577, TP0…	1.15263	0.96359	0.563179	9.40943
GOTERM_MF_ALL	GO:0005524~ATP binding	151	0.00707243	TP02_0361, TP01_1212, TP04_0614, TP03_0013, TP01_1004, TP02_0351, TP01_1122, TP03_0569, TP03_0425, TP02_0664, TP01_1125, TP02_0167, TP02_0937, TP01_0166, TP01_0824, TP01_0822, TP01_0460, TP04_0572, TP01_1097, TP02_0172, TP02_0467, TP04_0622, TP04_0139, TP03_0142, TP04_0174, TP04_0364, TP01_0518, TP01_0965, TP04_0367, TP01_0866, TP02_0771, TP01_0252, TP02_0772, TP01_0666, TP01_0456, TP02_0577, TP0…	1.15273	0.966854	0.494074	9.66282
GOTERM_MF_ALL	GO:0097367~carbohydrate derivative binding	184	0.00717845	TP02_0361, TP01_1212, TP01_0278, TP04_0614, TP03_0013, TP01_1004, TP02_0351, TP01_1122, TP04_0334, TP03_0569, TP03_0425, TP02_0664, TP01_1125, TP02_0167, TP02_0937, TP01_0166, TP01_0824, TP01_0822, TP01_0460, TP03_0192, TP04_0572, TP01_1097, TP02_0172, TP02_0467, TP02_0464, TP04_0622, TP04_0139, TP03_0092, TP03_0142, TP04_0174, TP04_0364, TP01_0518, TP01_0965, TP04_0367, TP01_0866, TP02_0771, TP0…	1.13131	0.96851	0.438052	9.80082
GOTERM_MF_ALL	GO:0032549~ribonucleoside binding	182	0.00761285	TP02_0361, TP01_1212, TP01_0278, TP04_0614, TP03_0013, TP01_1004, TP02_0351, TP01_1122, TP04_0334, TP03_0569, TP03_0425, TP02_0664, TP01_1125, TP02_0167, TP02_0937, TP01_0166, TP01_0824, TP01_0822, TP01_0460, TP03_0192, TP04_0572, TP01_1097, TP02_0172, TP02_0467, TP02_0464, TP04_0622, TP04_0139, TP03_0142, TP04_0174, TP04_0364, TP01_0518, TP01_0965, TP04_0367, TP01_0866, TP02_0771, TP01_0252, TP0…	1.13124	0.974476	0.407865	10.3642
GOTERM_MF_ALL	GO:0001882~nucleoside binding	182	0.00761285	TP02_0361, TP01_1212, TP01_0278, TP04_0614, TP03_0013, TP01_1004, TP02_0351, TP01_1122, TP04_0334, TP03_0569, TP03_0425, TP02_0664, TP01_1125, TP02_0167, TP02_0937, TP01_0166, TP01_0824, TP01_0822, TP01_0460, TP03_0192, TP04_0572, TP01_1097, TP02_0172, TP02_0467, TP02_0464, TP04_0622, TP04_0139, TP03_0142, TP04_0174, TP04_0364, TP01_0518, TP01_0965, TP04_0367, TP01_0866, TP02_0771, TP01_0252, TP0…	1.13124	0.974476	0.407865	10.3642
GOTERM_MF_ALL	GO:0016874~ligase activity	44	0.00813782	TP01_0078, TP02_0322, TP01_0518, TP04_0367, TP01_1212, TP04_0389, TP01_0957, TP01_0958, TP01_0727, TP03_0065, TP01_0760, TP01_1004, TP03_0137, TP01_0127, TP01_0601, TP02_0107, TP04_0776, TP04_0894, TP01_0520, TP02_0838, TP04_0219, TP02_0689, TP02_0310, TP01_1024, TP01_0508, TP02_0331, TP04_0470, TP02_0167, TP03_0549, TP01_0166, TP03_0048, TP01_0229, TP01_0161, TP03_0387, TP04_0871, TP04_0592, TP0…	1.35265	0.980201	0.387537	11.0408
GOTERM_MF_ALL	GO:0032555~purine ribonucleotide binding	180	0.00938889	TP02_0361, TP01_1212, TP01_0278, TP04_0614, TP03_0013, TP01_1004, TP02_0351, TP01_1122, TP03_0569, TP03_0425, TP02_0664, TP01_1125, TP02_0167, TP02_0937, TP01_0166, TP01_0824, TP01_0822, TP01_0460, TP03_0192, TP04_0572, TP01_1097, TP02_0172, TP02_0467, TP02_0464, TP04_0622, TP04_0139, TP03_0142, TP04_0174, TP04_0364, TP01_0518, TP01_0965, TP04_0367, TP01_0866, TP02_0771, TP01_0252, TP02_0772, TP0…	1.12806	0.989197	0.395351	12.6339
GOTERM_MF_ALL	GO:0032553~ribonucleotide binding	181	0.0105814	TP02_0361, TP01_1212, TP01_0278, TP04_0614, TP03_0013, TP01_1004, TP02_0351, TP01_1122, TP03_0569, TP03_0425, TP02_0664, TP01_1125, TP02_0167, TP02_0937, TP01_0166, TP01_0824, TP01_0822, TP01_0460, TP03_0192, TP04_0572, TP01_1097, TP02_0172, TP02_0467, TP02_0464, TP04_0622, TP04_0139, TP03_0092, TP03_0142, TP04_0174, TP04_0364, TP01_0518, TP01_0965, TP04_0367, TP01_0866, TP02_0771, TP01_0252, TP0…	1.12503	0.99394	0.399872	14.1277
GOTERM_MF_ALL	GO:0017076~purine nucleotide binding	180	0.0108888	TP02_0361, TP01_1212, TP01_0278, TP04_0614, TP03_0013, TP01_1004, TP02_0351, TP01_1122, TP03_0569, TP03_0425, TP02_0664, TP01_1125, TP02_0167, TP02_0937, TP01_0166, TP01_0824, TP01_0822, TP01_0460, TP03_0192, TP04_0572, TP01_1097, TP02_0172, TP02_0467, TP02_0464, TP04_0622, TP04_0139, TP03_0142, TP04_0174, TP04_0364, TP01_0518, TP01_0965, TP04_0367, TP01_0866, TP02_0771, TP01_0252, TP02_0772, TP0…	1.12496	0.99478	0.379824	14.5089
GOTERM_MF_ALL	GO:0032550~purine ribonucleoside binding	179	0.0112041	TP02_0361, TP01_1212, TP01_0278, TP04_0614, TP03_0013, TP01_1004, TP02_0351, TP01_1122, TP03_0569, TP03_0425, TP02_0664, TP01_1125, TP02_0167, TP02_0937, TP01_0166, TP01_0824, TP01_0822, TP01_0460, TP03_0192, TP04_0572, TP01_1097, TP02_0172, TP02_0467, TP02_0464, TP04_0622, TP04_0139, TP03_0142, TP04_0174, TP04_0364, TP01_0518, TP01_0965, TP04_0367, TP01_0866, TP02_0771, TP01_0252, TP02_0772, TP0…	1.12489	0.995521	0.362815	14.8983
GOTERM_MF_ALL	GO:0001883~purine nucleoside binding	179	0.0112041	TP02_0361, TP01_1212, TP01_0278, TP04_0614, TP03_0013, TP01_1004, TP02_0351, TP01_1122, TP03_0569, TP03_0425, TP02_0664, TP01_1125, TP02_0167, TP02_0937, TP01_0166, TP01_0824, TP01_0822, TP01_0460, TP03_0192, TP04_0572, TP01_1097, TP02_0172, TP02_0467, TP02_0464, TP04_0622, TP04_0139, TP03_0142, TP04_0174, TP04_0364, TP01_0518, TP01_0965, TP04_0367, TP01_0866, TP02_0771, TP01_0252, TP02_0772, TP0…	1.12489	0.995521	0.362815	14.8983
GOTERM_MF_ALL	GO:0035639~purine ribonucleoside triphosphate binding	179	0.0112041	TP02_0361, TP01_1212, TP01_0278, TP04_0614, TP03_0013, TP01_1004, TP02_0351, TP01_1122, TP03_0569, TP03_0425, TP02_0664, TP01_1125, TP02_0167, TP02_0937, TP01_0166, TP01_0824, TP01_0822, TP01_0460, TP03_0192, TP04_0572, TP01_1097, TP02_0172, TP02_0467, TP02_0464, TP04_0622, TP04_0139, TP03_0142, TP04_0174, TP04_0364, TP01_0518, TP01_0965, TP04_0367, TP01_0866, TP02_0771, TP01_0252, TP02_0772, TP0…	1.12489	0.995521	0.362815	14.8983
GOTERM_MF_ALL	GO:0003824~catalytic activity	373	0.0136653	TP02_0944, TP02_0361, TP01_0988, TP01_0076, TP01_0989, TP01_0078, TP01_1219, TP01_1212, TP01_0177, TP01_0480, TP01_0278, TP02_0260, TP01_0471, TP02_0253, TP02_0061, TP01_0184, TP01_0381, TP02_0162, TP02_0351, TP01_1122, TP04_0894, TP02_0664, TP02_0165, TP04_0897, TP01_0064, TP02_0167, TP01_1125, TP01_0166, TP02_0930, TP02_0667, TP02_0668, TP01_0460, TP03_0192, TP02_0560, TP01_0657, TP02_0567, TP0…	1.06068	0.998646	0.398328	17.8814
GOTERM_MF_ALL	GO:0003887~DNA-directed DNA polymerase activity	7	0.0308805	TP01_0386, TP01_0899, TP03_0202, TP02_0469, TP04_0813, TP02_0276, TP04_0814	2.27492	1	0.658857	36.1804
GOTERM_MF_ALL	GO:0000287~magnesium ion binding	13	0.0429581	TP02_0848, TP02_0912, TP02_0167, TP02_0134, TP03_0479, TP04_0700, TP04_0607, TP02_0772, TP04_0871, TP01_0299, TP01_0300, TP02_0061, TP04_0620	1.643	1	0.754648	46.6697
GOTERM_MF_ALL	GO:0008079~translation termination factor activity	6	0.0615603	TP04_0242, TP01_0213, TP03_0724, TP03_0302, TP02_0750, TP01_0422	2.27492	1	0.851341	59.7356
GOTERM_MF_ALL	GO:0003747~translation release factor activity	6	0.0615603	TP04_0242, TP01_0213, TP03_0724, TP03_0302, TP02_0750, TP01_0422	2.27492	1	0.851341	59.7356
GOTERM_MF_ALL	GO:0003746~translation elongation factor activity	12	0.0680001	TP01_0726, TP04_0514, TP03_0279, TP04_0253, TP04_0492, TP03_0816, TP01_1096, TP01_0553, TP04_0877, TP01_0884, TP01_0638, TP01_0278	1.60583	1	0.863086	63.5159
GOTERM_MF_ALL	GO:0034061~DNA polymerase activity	7	0.077859	TP01_0386, TP01_0899, TP03_0202, TP02_0469, TP04_0813, TP02_0276, TP04_0814	1.99055	1	0.88485	68.6688
GOTERM_MF_ALL	GO:0036094~small molecule binding	213	0.0962086	TP02_0361, TP01_1212, TP01_0278, TP01_0577, TP02_0351, TP01_1122, TP02_0664, TP01_1127, TP01_1125, TP02_0167, TP02_0937, TP01_0166, TP01_0460, TP03_0192, TP01_1097, TP02_0172, TP02_0467, TP02_0464, TP03_0092, TP01_0965, TP01_0866, TP02_0771, TP01_0252, TP02_0772, TP01_0666, TP01_0456, TP02_0577, TP01_0760, TP02_0181, TP01_0386, TP01_0043, TP02_0390, TP02_0391, TP01_0389, TP02_0787, TP02_0251, TP0…	1.06263	1	0.92235	76.5039
GOTERM_MF_ALL	GO:0016667~oxidoreductase activity, acting on a sulfur group of donors	9	0.0964084	TP01_0471, TP02_0206, TP03_0130, TP03_0411, TP03_0110, TP03_0227, TP04_0177, TP02_0035, TP02_0196	1.70619	1	0.912233	76.5782
GOTERM_MF_ALL	GO:0016788~hydrolase activity, acting on ester bonds	36	0.0997019	TP01_0968, TP04_0410, TP02_0944, TP01_0398, TP03_0382, TP02_0676, TP03_0789, TP01_0184, TP04_0147, TP04_0813, TP04_0474, TP01_1149, TP04_0320, TP01_1200, TP04_0165, TP01_0386, TP02_0310, TP01_0041, TP01_1140, TP01_0899, TP03_0250, TP02_0165, TP01_0040, TP01_0694, TP02_0912, TP01_0064, TP03_0264, TP01_0245, TP01_0166, TP02_0909, TP04_0592, TP03_0385, TP03_0416, TP03_0202, TP01_0904, TP02_0541	1.22234	1	0.909343	77.7712

## Sheet: BIOLOGICAL PROCESS OF UP-REGULA
BIOLOGICAL PROCESS OF UP-REGULATED GENES IN THE PIROPLASM
Category	Term	Count	PValue	Genes	Fold Enrichment	Bonferroni	Benjamini	FDR
GOTERM_BP_ALL	GO:0022613~ribonucleoprotein complex biogenesis	36	0.000488565	TP01_0235, TP02_0307, TP02_0631, TP04_0430, TP02_0303, TP02_0083, TP02_0516, TP01_0183, TP04_0396, TP02_0376, TP03_0112, TP01_1168, TP04_0350, TP04_0611, TP04_0739, TP01_0347, TP01_1027, TP02_0333, TP04_0856, TP04_0892, TP01_1023, TP03_0023, TP01_0857, TP02_0595, TP01_0160, TP01_0242, TP02_0248, TP02_0247, TP01_0946, TP01_0015, TP04_0748, TP04_0158, TP01_0673, TP03_0223, TP01_0777, TP02_0408	1.61244	0.270358	0.270358	0.726241
GOTERM_BP_ALL	GO:0044085~cellular component biogenesis	45	0.00187447	TP01_0235, TP02_0307, TP02_0631, TP04_0430, TP02_0303, TP02_0083, TP04_0553, TP02_0516, TP01_0183, TP01_1085, TP04_0396, TP04_0636, TP03_0112, TP02_0376, TP01_1168, TP01_0024, TP03_0233, TP04_0350, TP04_0611, TP04_0610, TP04_0739, TP01_0347, TP02_0333, TP01_1027, TP04_0856, TP02_0371, TP04_0892, TP01_1023, TP03_0023, TP01_0857, TP02_0595, TP01_0160, TP01_0242, TP02_0248, TP01_0192, TP02_0247, TP0…	1.44646	0.701853	0.453972	2.75967
GOTERM_BP_ALL	GO:0022618~ribonucleoprotein complex assembly	15	0.00441426	TP01_0347, TP02_0333, TP02_0307, TP01_0235, TP01_1023, TP04_0430, TP02_0303, TP02_0595, TP02_0516, TP02_0247, TP04_0396, TP02_0376, TP01_1168, TP04_0748, TP04_0739	1.95157	0.942358	0.61371	6.38562
GOTERM_BP_ALL	GO:0071826~ribonucleoprotein complex subunit organization	15	0.00441426	TP01_0347, TP02_0333, TP02_0307, TP01_0235, TP01_1023, TP04_0430, TP02_0303, TP02_0595, TP02_0516, TP02_0247, TP04_0396, TP02_0376, TP01_1168, TP04_0748, TP04_0739	1.95157	0.942358	0.61371	6.38562
GOTERM_BP_ALL	GO:0042254~ribosome biogenesis	26	0.00865601	TP02_0631, TP04_0430, TP02_0083, TP01_0183, TP03_0112, TP04_0350, TP04_0611, TP01_0347, TP01_1027, TP02_0333, TP04_0856, TP04_0892, TP01_1023, TP03_0023, TP01_0857, TP01_0160, TP01_0242, TP02_0248, TP01_0946, TP01_0015, TP04_0748, TP04_0158, TP01_0673, TP03_0223, TP02_0408, TP01_0777	1.54428	0.99633	0.753861	12.1614
GOTERM_BP_ALL	GO:0010467~gene expression	148	0.0124234	TP01_0841, TP02_0949, TP04_0348, TP03_0199, TP02_0803, TP02_0801, TP03_0376, TP02_0064, TP04_0751, TP01_0183, TP03_0012, TP01_0642, TP02_0352, TP04_0611, TP02_0471, TP04_0421, TP01_0066, TP04_0238, TP01_0858, TP03_0566, TP03_0428, TP04_0233, TP01_0992, TP04_0340, TP01_0560, TP03_0106, TP02_0926, TP04_0434, TP01_0964, TP02_0307, TP01_0963, TP02_0631, TP02_0305, TP03_0755, TP02_0179, TP02_0303, TP0…	1.13267	0.999685	0.800642	17.0108
GOTERM_BP_ALL	GO:0034641~cellular nitrogen compound metabolic process	201	0.0205319	TP01_0841, TP02_0949, TP03_0199, TP02_0803, TP02_0801, TP02_0064, TP01_0183, TP01_0476, TP01_0642, TP02_0355, TP02_0352, TP02_0471, TP01_0066, TP01_1124, TP01_0363, TP01_0858, TP01_0857, TP01_0994, TP01_0992, TP02_0463, TP01_0560, TP01_0964, TP01_0963, TP02_0631, TP01_0860, TP02_0179, TP01_0862, TP01_0199, TP02_0437, TP02_0237, TP02_0439, TP02_0235, TP02_0438, TP02_0376, TP03_0084, TP01_0045, TP0…	1.08747	0.999998	0.892488	26.6134
GOTERM_BP_ALL	GO:0006807~nitrogen compound metabolic process	203	0.0217399	TP01_0841, TP02_0949, TP03_0199, TP02_0803, TP02_0801, TP02_0064, TP01_0183, TP01_0476, TP01_0642, TP02_0355, TP02_0352, TP02_0471, TP01_0066, TP01_1124, TP01_0363, TP01_0858, TP01_0857, TP01_0994, TP01_0992, TP02_0463, TP01_0560, TP01_0964, TP01_0963, TP02_0631, TP01_0860, TP02_0179, TP01_0862, TP01_0199, TP02_0437, TP02_0237, TP02_0439, TP02_0235, TP02_0438, TP02_0376, TP03_0084, TP01_0045, TP0…	1.08539	0.999999	0.868043	27.9519
GOTERM_BP_ALL	GO:0022607~cellular component assembly	24	0.0285575	TP01_0347, TP02_0333, TP02_0371, TP02_0307, TP01_0235, TP01_1023, TP04_0430, TP02_0303, TP02_0595, TP04_0553, TP01_0192, TP02_0516, TP02_0247, TP01_1085, TP04_0636, TP04_0396, TP02_0376, TP01_1168, TP01_0488, TP04_0748, TP01_0024, TP03_0233, TP04_0739, TP04_0610	1.45717	1	0.903282	35.0885
GOTERM_BP_ALL	GO:0044271~cellular nitrogen compound biosynthetic process	119	0.0397851	TP02_0949, TP03_0773, TP03_0199, TP02_0803, TP03_0631, TP02_0801, TP03_0376, TP02_0064, TP01_0476, TP03_0012, TP04_0421, TP01_0066, TP01_1124, TP04_0238, TP01_0858, TP03_0566, TP01_0994, TP03_0428, TP04_0233, TP03_0220, TP01_0560, TP04_0340, TP03_0106, TP04_0434, TP01_0964, TP02_0307, TP03_0755, TP02_0305, TP01_0862, TP02_0303, TP01_0811, TP01_0199, TP04_0033, TP01_0818, TP02_0237, TP02_0235, TP0…	1.12502	1	0.945499	45.4219
GOTERM_BP_ALL	GO:0043933~macromolecular complex subunit organization	26	0.0525723	TP04_0434, TP02_0483, TP01_0235, TP02_0307, TP04_0430, TP02_0303, TP01_0356, TP04_0553, TP03_0682, TP02_0516, TP01_1085, TP04_0396, TP02_0376, TP01_1168, TP03_0233, TP01_0128, TP04_0739, TP01_0347, TP02_0333, TP02_0371, TP01_1023, TP02_0595, TP02_0247, TP04_0748, TP01_0488, TP01_0779	1.3661	1	0.969294	55.3135
GOTERM_BP_ALL	GO:0065003~macromolecular complex assembly	20	0.0574534	TP01_0347, TP02_0333, TP02_0371, TP02_0307, TP01_0235, TP01_1023, TP04_0430, TP02_0303, TP02_0595, TP04_0553, TP02_0516, TP02_0247, TP01_1085, TP04_0396, TP02_0376, TP01_1168, TP01_0488, TP04_0748, TP03_0233, TP04_0739	1.438	1	0.968868	58.627
GOTERM_BP_ALL	GO:0009058~biosynthetic process	151	0.0627299	TP03_0432, TP02_0949, TP03_0773, TP03_0199, TP02_0057, TP02_0803, TP03_0631, TP02_0801, TP04_0244, TP02_0058, TP03_0376, TP02_0064, TP04_0048, TP01_0476, TP03_0012, TP03_0236, TP04_0610, TP02_0471, TP04_0421, TP01_0066, TP02_0935, TP03_0421, TP01_1124, TP04_0238, TP01_0858, TP03_0566, TP01_0994, TP03_0565, TP03_0428, TP04_0233, TP02_0073, TP03_0220, TP04_0340, TP01_0560, TP02_0364, TP03_0106, TP0…	1.08855	1	0.969258	61.9502
GOTERM_BP_ALL	GO:0008380~RNA splicing	15	0.0715736	TP01_0841, TP01_0963, TP04_0348, TP02_0595, TP01_1183, TP03_0386, TP01_0992, TP04_0661, TP02_0516, TP01_1168, TP01_0642, TP02_0729, TP02_0511, TP03_0294, TP01_1166	1.51789	1	0.974894	66.9675
GOTERM_BP_ALL	GO:0019438~aromatic compound biosynthetic process	47	0.0990989	TP02_0205, TP04_0434, TP04_0267, TP02_0483, TP03_0773, TP04_0461, TP02_0118, TP01_0862, TP03_0199, TP01_0811, TP03_0631, TP04_0033, TP03_0376, TP03_0682, TP02_0237, TP01_0029, TP01_0725, TP01_0935, TP01_0749, TP03_0859, TP04_0911, TP03_0185, TP01_0128, TP03_0069, TP01_0201, TP03_0252, TP03_0742, TP01_1124, TP04_0879, TP01_0225, TP01_0929, TP01_0858, TP02_0144, TP01_0994, TP04_0545, TP03_0027, TP0…	1.18901	1	0.991836	78.9141
GOTERM_BP_ALL	GO:0044249~cellular biosynthetic process	144	0.0998643	TP03_0432, TP02_0949, TP03_0773, TP03_0199, TP02_0057, TP02_0803, TP03_0631, TP04_0244, TP02_0801, TP03_0376, TP02_0064, TP04_0048, TP01_0476, TP03_0012, TP03_0236, TP04_0610, TP04_0421, TP01_0066, TP03_0421, TP01_1124, TP04_0238, TP01_0858, TP03_0566, TP03_0565, TP01_0994, TP03_0428, TP04_0233, TP02_0073, TP03_0220, TP04_0340, TP01_0560, TP02_0364, TP03_0106, TP04_0434, TP01_0964, TP01_0516, TP0…	1.07791	1	0.989155	79.1797

## Sheet: BIOLOGICAL PROCESS OF DOWN-REGU
BIOLOGICAL PROCESS OF DOWN-REGULATED GENES IN SCHIZONT
Category	Term	Count	PValue	Genes	Fold Enrichment	Bonferroni	Benjamini	FDR
GOTERM_BP_ALL	GO:0043436~oxoacid metabolic process	44	3.38391e-06	TP02_0962, TP01_0518, TP02_0322, TP01_0965, TP04_0367, TP04_0700, TP01_1212, TP04_0389, TP04_0883, TP01_0957, TP02_0234, TP01_0727, TP03_0065, TP01_0760, TP01_1004, TP03_0137, TP01_0101, TP04_0776, TP01_0043, TP02_0838, TP04_0219, TP02_0310, TP03_0250, TP01_1024, TP04_0470, TP02_0167, TP01_0166, TP04_0690, TP04_0504, TP01_0161, TP03_0387, TP04_0871, TP01_1182, TP04_0592, TP01_0460, TP03_0346, TP0…	1.67106	0.0027001	0.0027001	0.00519334
GOTERM_BP_ALL	GO:0019752~carboxylic acid metabolic process	44	3.38391e-06	TP02_0962, TP01_0518, TP02_0322, TP01_0965, TP04_0367, TP04_0700, TP01_1212, TP04_0389, TP04_0883, TP01_0957, TP02_0234, TP01_0727, TP03_0065, TP01_0760, TP01_1004, TP03_0137, TP01_0101, TP04_0776, TP01_0043, TP02_0838, TP04_0219, TP02_0310, TP03_0250, TP01_1024, TP04_0470, TP02_0167, TP01_0166, TP04_0690, TP04_0504, TP01_0161, TP03_0387, TP04_0871, TP01_1182, TP04_0592, TP01_0460, TP03_0346, TP0…	1.67106	0.0027001	0.0027001	0.00519334
GOTERM_BP_ALL	GO:0006082~organic acid metabolic process	46	5.60497e-06	TP02_0962, TP01_0210, TP01_0518, TP02_0322, TP01_0965, TP04_0367, TP04_0700, TP01_1212, TP04_0389, TP04_0883, TP01_0957, TP02_0234, TP01_0727, TP03_0065, TP01_0760, TP01_1004, TP03_0137, TP01_0101, TP04_0776, TP01_0043, TP02_0838, TP04_0219, TP02_0310, TP03_0250, TP01_1024, TP04_0470, TP02_0167, TP01_0166, TP04_0690, TP04_0504, TP01_0161, TP03_0387, TP04_0871, TP01_1182, TP04_0592, TP01_0460, TP0…	1.63246	0.00446837	0.00223669	0.00860189
GOTERM_BP_ALL	GO:0006520~cellular amino acid metabolic process	32	8.50701e-05	TP01_0518, TP02_0322, TP04_0367, TP01_1212, TP04_0389, TP04_0883, TP01_0957, TP02_0234, TP03_0065, TP01_0727, TP01_0760, TP01_1004, TP03_0137, TP04_0776, TP02_0838, TP02_0310, TP03_0250, TP01_1024, TP04_0470, TP02_0167, TP01_0166, TP04_0504, TP01_0161, TP03_0387, TP04_0592, TP04_0871, TP01_0460, TP04_0572, TP03_0416, TP04_0622, TP02_0541, TP02_0746	1.68959	0.0657151	0.0224032	0.130482
GOTERM_BP_ALL	GO:0006418~tRNA aminoacylation for protein translation	27	0.000100604	TP01_0518, TP02_0322, TP04_0367, TP01_1212, TP04_0389, TP01_0957, TP03_0065, TP01_0727, TP01_0760, TP01_1004, TP03_0137, TP04_0776, TP02_0310, TP01_1024, TP04_0470, TP02_0167, TP01_0166, TP03_0387, TP01_0161, TP04_0592, TP04_0871, TP01_0460, TP04_0572, TP03_0416, TP04_0622, TP02_0541, TP02_0746	1.77119	0.0772402	0.019896	0.15429
GOTERM_BP_ALL	GO:0043038~amino acid activation	27	0.000100604	TP01_0518, TP02_0322, TP04_0367, TP01_1212, TP04_0389, TP01_0957, TP03_0065, TP01_0727, TP01_0760, TP01_1004, TP03_0137, TP04_0776, TP02_0310, TP01_1024, TP04_0470, TP02_0167, TP01_0166, TP03_0387, TP01_0161, TP04_0592, TP04_0871, TP01_0460, TP04_0572, TP03_0416, TP04_0622, TP02_0541, TP02_0746	1.77119	0.0772402	0.019896	0.15429
GOTERM_BP_ALL	GO:0043039~tRNA aminoacylation	27	0.000100604	TP01_0518, TP02_0322, TP04_0367, TP01_1212, TP04_0389, TP01_0957, TP03_0065, TP01_0727, TP01_0760, TP01_1004, TP03_0137, TP04_0776, TP02_0310, TP01_1024, TP04_0470, TP02_0167, TP01_0166, TP03_0387, TP01_0161, TP04_0592, TP04_0871, TP01_0460, TP04_0572, TP03_0416, TP04_0622, TP02_0541, TP02_0746	1.77119	0.0772402	0.019896	0.15429
GOTERM_BP_ALL	GO:0044699~single-organism process	158	0.00245201	TP03_0241, TP01_1219, TP01_1212, TP01_0177, TP04_0251, TP01_0471, TP02_0253, TP03_0375, TP02_0063, TP01_0381, TP01_1004, TP02_0557, TP03_0238, TP03_0110, TP03_0111, TP03_0837, TP02_0353, TP01_1122, TP02_0769, TP03_0569, TP04_0897, TP03_0628, TP02_0167, TP01_0166, TP01_0827, TP02_0667, TP03_0567, TP01_0460, TP03_0108, TP01_0461, TP04_0572, TP03_0365, TP03_0366, TP01_1097, TP04_0036, TP01_0073, TP0…	1.15553	0.859361	0.324507	3.69775
GOTERM_BP_ALL	GO:0044281~small molecule metabolic process	68	0.00358798	TP03_0241, TP02_0848, TP02_0322, TP01_1212, TP04_0389, TP02_0253, TP01_0471, TP03_0065, TP01_1004, TP01_0381, TP02_0197, TP03_0569, TP04_0714, TP02_0838, TP02_0310, TP04_0470, TP03_0628, TP02_0167, TP01_0166, TP02_0319, TP01_0460, TP04_0572, TP03_0366, TP02_0422, TP04_0383, TP01_0073, TP02_0171, TP04_0620, TP04_0464, TP04_0622, TP02_0962, TP01_0210, TP01_0518, TP01_0965, TP04_0367, TP04_0700, TP0…	1.28005	0.943411	0.380386	5.36715
GOTERM_BP_ALL	GO:0044710~single-organism metabolic process	89	0.00523174	TP01_1171, TP03_0241, TP02_0848, TP01_0030, TP02_0322, TP01_1219, TP01_1212, TP02_0115, TP04_0389, TP01_0471, TP02_0253, TP03_0065, TP01_1004, TP01_0381, TP03_0238, TP02_0197, TP04_0208, TP04_0714, TP03_0569, TP04_0525, TP02_0838, TP02_0310, TP04_0897, TP04_0470, TP03_0628, TP02_0167, TP01_0166, TP02_0319, TP02_0667, TP01_0460, TP03_0365, TP04_0572, TP03_0366, TP02_0422, TP04_0383, TP01_0073, TP0…	1.2194	0.984871	0.450493	7.73497
GOTERM_BP_ALL	GO:0044763~single-organism cellular process	148	0.00649194	TP03_0241, TP01_1219, TP01_1212, TP01_0177, TP04_0251, TP01_0471, TP02_0253, TP02_0063, TP01_0381, TP01_1004, TP02_0557, TP03_0238, TP03_0110, TP03_0111, TP02_0353, TP01_1122, TP02_0769, TP03_0569, TP03_0628, TP02_0167, TP01_0166, TP01_0827, TP02_0667, TP03_0567, TP01_0460, TP03_0108, TP01_0461, TP04_0572, TP03_0365, TP03_0366, TP01_1097, TP04_0036, TP01_0073, TP02_0171, TP04_0620, TP03_0227, TP0…	1.14424	0.994505	0.478213	9.51263
GOTERM_BP_ALL	GO:0006399~tRNA metabolic process	36	0.00818239	TP02_0322, TP01_0518, TP04_0367, TP01_1212, TP04_0389, TP01_0957, TP04_0026, TP01_0727, TP03_0065, TP03_0789, TP01_0184, TP01_0760, TP01_1004, TP03_0137, TP04_0776, TP01_1102, TP02_0310, TP01_1024, TP04_0470, TP02_0167, TP04_0141, TP01_0166, TP02_0251, TP01_0161, TP03_0387, TP02_0909, TP02_0339, TP04_0592, TP04_0871, TP01_0460, TP01_1072, TP04_0572, TP03_0416, TP04_0622, TP02_0541, TP02_0746	1.39165	0.998591	0.517803	11.847
GOTERM_BP_ALL	GO:0006996~organelle organization	33	0.022553	TP03_0142, TP01_1173, TP03_0816, TP03_0176, TP02_0117, TP02_0675, TP01_0278, TP02_0771, TP01_0286, TP04_0677, TP04_0675, TP02_0063, TP01_1004, TP02_0557, TP03_0111, TP03_0311, TP02_0198, TP04_0370, TP04_0302, TP04_0458, TP02_0769, TP04_0409, TP01_1121, TP04_0500, TP01_1125, TP02_0786, TP04_0508, TP01_0152, TP02_0707, TP04_0665, TP01_0926, TP03_0591, TP02_0467	1.34789	1	0.838397	29.5379
GOTERM_BP_ALL	GO:0006950~response to stress	29	0.0281785	TP01_0968, TP01_1173, TP01_0988, TP02_0924, TP01_0989, TP01_0030, TP03_0382, TP01_0456, TP03_0481, TP01_0120, TP01_0724, TP04_0230, TP04_0147, TP04_0813, TP04_0814, TP04_0165, TP01_0706, TP04_0501, TP04_0500, TP02_0912, TP03_0549, TP02_0096, TP01_0185, TP02_0707, TP02_0244, TP04_0745, TP04_0646, TP01_0753, TP04_0823	1.36476	1	0.874591	35.5113
GOTERM_BP_ALL	GO:0006220~pyrimidine nucleotide metabolic process	7	0.0400429	TP02_0838, TP02_0422, TP01_0381, TP01_0073, TP04_0504, TP01_1133, TP02_0319	2.16479	1	0.934194	46.5916
GOTERM_BP_ALL	GO:0045454~cell redox homeostasis	14	0.0406847	TP01_0863, TP01_0177, TP02_0035, TP02_0602, TP03_0419, TP01_0471, TP04_0036, TP03_0672, TP03_0110, TP03_0227, TP04_0177, TP02_0353, TP02_0196, TP04_0061	1.59511	1	0.922139	47.137
GOTERM_BP_ALL	GO:1902589~single-organism organelle organization	10	0.0410632	TP04_0409, TP01_0152, TP01_0926, TP04_0500, TP03_0176, TP02_0557, TP03_0111, TP02_0675, TP04_0370, TP04_0458	1.80399	1	0.908646	47.4562
GOTERM_BP_ALL	GO:0009056~catabolic process	40	0.0467429	TP02_0927, TP02_0361, TP02_0344, TP04_0364, TP04_0366, TP01_0965, TP04_0700, TP01_0290, TP04_0603, TP04_0883, TP04_0438, TP02_0676, TP02_0234, TP03_0662, TP01_0101, TP01_0043, TP01_0874, TP03_0250, TP04_0424, TP04_0897, TP02_0912, TP03_0446, TP03_0264, TP04_0690, TP01_0187, TP04_0594, TP02_0930, TP02_0893, TP03_0346, TP02_0587, TP02_0560, TP01_0302, TP03_0494, TP04_0383, TP03_0225, TP04_0464, TP0…	1.25495	1	0.921911	52.0349
GOTERM_BP_ALL	GO:0006974~cellular response to DNA damage stimulus	24	0.0690583	TP01_0968, TP04_0165, TP01_0988, TP01_1173, TP02_0924, TP04_0501, TP04_0500, TP01_0989, TP01_0030, TP02_0912, TP03_0549, TP03_0382, TP01_0185, TP01_0456, TP03_0481, TP02_0707, TP01_0120, TP01_0724, TP04_0745, TP04_0230, TP04_0147, TP04_0813, TP04_0823, TP04_0814	1.33218	1	0.971941	66.6545
GOTERM_BP_ALL	GO:0019725~cellular homeostasis	15	0.0730226	TP01_0043, TP01_0863, TP01_0177, TP02_0035, TP02_0602, TP03_0419, TP01_0471, TP04_0036, TP03_0672, TP03_0110, TP03_0227, TP04_0177, TP02_0353, TP02_0196, TP04_0061	1.47599	1	0.97167	68.7685
GOTERM_BP_ALL	GO:0034660~ncRNA metabolic process	44	0.0758754	TP03_0598, TP03_0430, TP02_0322, TP01_0518, TP04_0367, TP01_1212, TP04_0389, TP04_0865, TP01_0957, TP04_0026, TP01_0727, TP03_0065, TP03_0789, TP04_0831, TP01_0184, TP01_0760, TP01_1004, TP04_0797, TP03_0137, TP04_0776, TP01_0329, TP01_1102, TP02_0310, TP01_1024, TP04_0470, TP02_0167, TP04_0141, TP01_0166, TP02_0251, TP01_0161, TP03_0387, TP02_0909, TP02_0339, TP04_0871, TP04_0592, TP01_0460, TP0…	1.2057	1	0.969883	70.2115
GOTERM_BP_ALL	GO:0006221~pyrimidine nucleotide biosynthetic process	6	0.0762126	TP02_0838, TP02_0422, TP01_0073, TP04_0504, TP01_1133, TP02_0319	2.16479	1	0.964337	70.3779
GOTERM_BP_ALL	GO:0009132~nucleoside diphosphate metabolic process	10	0.0798381	TP03_0346, TP01_0043, TP04_0383, TP01_0965, TP04_0700, TP04_0690, TP04_0464, TP02_0319, TP01_0101, TP01_1196	1.66522	1	0.963994	72.1127
GOTERM_BP_ALL	GO:0044723~single-organism carbohydrate metabolic process	11	0.0884323	TP01_0118, TP03_0346, TP01_0043, TP04_0383, TP01_0965, TP04_0700, TP01_0595, TP04_0690, TP04_0464, TP01_0101, TP01_0495	1.58751	1	0.970484	75.8532
GOTERM_BP_ALL	GO:0006281~DNA repair	23	0.0929786	TP01_0968, TP04_0165, TP01_1173, TP01_0988, TP02_0924, TP04_0501, TP04_0500, TP01_0989, TP01_0030, TP02_0912, TP03_0549, TP03_0382, TP01_0185, TP01_0456, TP03_0481, TP02_0707, TP01_0120, TP01_0724, TP04_0230, TP04_0147, TP04_0813, TP04_0823, TP04_0814	1.31026	1	0.97111	77.6368
GOTERM_BP_ALL	GO:0033554~cellular response to stress	24	0.0941104	TP01_0968, TP04_0165, TP01_0988, TP01_1173, TP02_0924, TP04_0501, TP04_0500, TP01_0989, TP01_0030, TP02_0912, TP03_0549, TP03_0382, TP01_0185, TP01_0456, TP03_0481, TP02_0707, TP01_0120, TP01_0724, TP04_0745, TP04_0230, TP04_0147, TP04_0813, TP04_0823, TP04_0814	1.29887	1	0.967728	78.0612
GOTERM_BP_ALL	GO:0006259~DNA metabolic process	41	0.0953748	TP01_0968, TP01_0988, TP01_1173, TP02_0924, TP04_0510, TP01_0989, TP01_0030, TP02_0771, TP03_0382, TP01_0666, TP01_1062, TP01_0456, TP03_0481, TP01_0120, TP01_0724, TP04_0230, TP04_0147, TP04_0813, TP02_0198, TP02_0276, TP03_0528, TP04_0814, TP04_0165, TP01_0386, TP03_0445, TP01_0507, TP01_0899, TP04_0501, TP04_0500, TP02_0912, TP03_0549, TP01_1125, TP03_0264, TP01_0185, TP02_0707, TP03_0202, TP0…	1.19941	1	0.964456	78.5265
GOTERM_BP_ALL	GO:0044712~single-organism catabolic process	12	0.0954584	TP03_0346, TP01_0043, TP02_0234, TP03_0250, TP04_0897, TP04_0383, TP01_0965, TP04_0700, TP04_0690, TP04_0464, TP01_0101, TP04_0883	1.52808	1	0.9595	78.557
GOTERM_BP_ALL	GO:1901575~organic substance catabolic process	37	0.0969406	TP02_0927, TP02_0361, TP02_0344, TP04_0364, TP04_0366, TP01_0965, TP04_0700, TP01_0290, TP04_0603, TP04_0883, TP02_0676, TP02_0234, TP03_0662, TP01_0101, TP01_0043, TP01_0874, TP03_0250, TP04_0897, TP02_0912, TP03_0446, TP03_0264, TP04_0690, TP01_0187, TP04_0594, TP02_0930, TP02_0893, TP03_0346, TP02_0587, TP02_0560, TP01_0302, TP03_0494, TP04_0383, TP03_0225, TP04_0464, TP04_0315, TP04_0827, TP0…	1.21359	1	0.956436	79.0899

## Sheet: CELLULAR COMPONENT  OF UP-Piro
CELLULAR COMPONENT OF UP-REGULATED GENES IN THE PIROPLASM
Category	Term	Count	PValue	Genes	Fold Enrichment	Bonferroni	Benjamini	FDR
GOTERM_CC_ALL	GO:1990904~ribonucleoprotein complex	110	3.29373e-05	TP04_0151, TP02_0949, TP04_0348, TP02_0803, TP02_0801, TP02_0064, TP01_0183, TP03_0012, TP01_0642, TP04_0350, TP04_0611, TP01_0852, TP04_0421, TP04_0892, TP01_0066, TP04_0238, TP01_0163, TP03_0566, TP03_0429, TP03_0428, TP01_0992, TP01_0653, TP01_0654, TP02_0362, TP01_0560, TP03_0106, TP03_0223, TP04_0176, TP01_0964, TP02_0307, TP02_0631, TP03_0755, TP02_0305, TP02_0303, TP04_0032, TP01_0199, TP0…	1.32879	0.00689309	0.00689309	0.0416052
GOTERM_CC_ALL	GO:0030529~intracellular ribonucleoprotein complex	110	3.29373e-05	TP04_0151, TP02_0949, TP04_0348, TP02_0803, TP02_0801, TP02_0064, TP01_0183, TP03_0012, TP01_0642, TP04_0350, TP04_0611, TP01_0852, TP04_0421, TP04_0892, TP01_0066, TP04_0238, TP01_0163, TP03_0566, TP03_0429, TP03_0428, TP01_0992, TP01_0653, TP01_0654, TP02_0362, TP01_0560, TP03_0106, TP03_0223, TP04_0176, TP01_0964, TP02_0307, TP02_0631, TP03_0755, TP02_0305, TP02_0303, TP04_0032, TP01_0199, TP0…	1.32879	0.00689309	0.00689309	0.0416052
GOTERM_CC_ALL	GO:0044423~virion part	16	0.00196614	TP04_0265, TP04_0358, TP04_0151, TP03_0756, TP01_0432, TP03_0386, TP01_0949, TP01_0992, TP01_0039, TP01_0806, TP02_0700, TP02_0544, TP04_0350, TP02_0362, TP02_0729, TP03_0294	1.95212	0.338533	0.186694	2.45581
GOTERM_CC_ALL	GO:0019028~viral capsid	16	0.00196614	TP04_0265, TP04_0358, TP04_0151, TP03_0756, TP01_0432, TP03_0386, TP01_0949, TP01_0992, TP01_0039, TP01_0806, TP02_0700, TP02_0544, TP04_0350, TP02_0362, TP02_0729, TP03_0294	1.95212	0.338533	0.186694	2.45581
GOTERM_CC_ALL	GO:0019012~virion	16	0.00196614	TP04_0265, TP04_0358, TP04_0151, TP03_0756, TP01_0432, TP03_0386, TP01_0949, TP01_0992, TP01_0039, TP01_0806, TP02_0700, TP02_0544, TP04_0350, TP02_0362, TP02_0729, TP03_0294	1.95212	0.338533	0.186694	2.45581
GOTERM_CC_ALL	GO:0019013~viral nucleocapsid	15	0.00370579	TP04_0265, TP04_0358, TP04_0151, TP01_0432, TP03_0386, TP01_0949, TP01_0992, TP01_0039, TP01_0806, TP02_0700, TP02_0544, TP04_0350, TP02_0362, TP02_0729, TP03_0294	1.92643	0.541439	0.228861	4.5823
GOTERM_CC_ALL	GO:0005840~ribosome	71	0.0242968	TP02_0949, TP01_0682, TP02_0323, TP04_0388, TP02_0803, TP02_0801, TP04_0309, TP02_0064, TP04_0394, TP03_0012, TP02_0298, TP03_0163, TP04_0421, TP01_0066, TP04_0277, TP04_0238, TP03_0566, TP01_0892, TP03_0429, TP04_0711, TP03_0428, TP03_0050, TP01_0924, TP02_0720, TP01_0653, TP01_0654, TP03_0860, TP04_0282, TP01_0560, TP01_1051, TP03_0106, TP03_0223, TP04_0481, TP02_0487, TP04_0266, TP02_0283, TP0…	1.21154	0.994289	0.725096	26.7109
GOTERM_CC_ALL	GO:0030532~small nuclear ribonucleoprotein complex	5	0.0937635	TP02_0516, TP04_0348, TP01_1168, TP02_0595, TP02_0729	2.44015	1	0.983999	71.1738

## Sheet: CELLULAR COMPONENT  OF DOWN-Sch
CELLULAR COMPONENT OF DOWN-REGULATED GENES IN SCHIZONT
Category	Term	Count	%	PValue	Genes	List Total	Pop Hits	Pop Total	Fold Enrichment	Bonferroni	Benjamini	FDR
GOTERM_CC_ALL	GO:0005623~cell	306	18.5905	0.000949932	TP01_0988, TP01_0989, TP02_0651, TP01_1213, TP01_0980, TP01_0177, TP01_1119, TP02_0750, TP01_0278, TP01_0471, TP02_0253, TP01_0180, TP02_0063, TP02_0061, TP02_0162, TP02_0353, TP02_0768, TP02_0370, TP02_0769, TP01_1121, TP01_1127, TP02_0937, TP02_0167, TP01_0166, TP02_0930, TP01_1092, TP01_0460, TP01_0461, TP03_0191, TP02_0560, TP01_0797, TP01_0794, TP01_0272, TP02_0171, TP01_0799, TP02_0568, TP0…	545	674	1325	1.10378	0.205461	0.205461	1.22081
GOTERM_CC_ALL	GO:0005694~chromosome	20	1.21507	0.00348077	TP04_0409, TP04_0500, TP02_0117, TP04_0404, TP04_0508, TP01_0286, TP02_0707, TP04_0677, TP01_0120, TP04_0675, TP02_0063, TP04_0745, TP03_0111, TP02_0198, TP03_0311, TP04_0813, TP03_0152, TP04_0322, TP04_0321, TP04_0814	545	28	1325	1.73657	0.569934	0.344206	4.40652
GOTERM_CC_ALL	GO:0044424~intracellular part	272	16.5249	0.00386771	TP01_0988, TP01_0989, TP02_0651, TP01_1213, TP01_0980, TP01_1119, TP02_0750, TP01_0278, TP02_0253, TP01_0180, TP02_0063, TP02_0061, TP02_0162, TP02_0768, TP02_0370, TP02_0769, TP01_1121, TP01_1127, TP02_0937, TP02_0167, TP01_0166, TP02_0930, TP01_1092, TP01_0460, TP01_0461, TP03_0191, TP02_0560, TP01_0797, TP01_0794, TP01_0272, TP02_0171, TP02_0568, TP01_0799, TP02_0464, TP02_0927, TP03_0077, TP0…	545	601	1325	1.10031	0.608512	0.268457	4.88514
GOTERM_CC_ALL	GO:0005737~cytoplasm	168	10.2066	0.00454902	TP02_0651, TP01_0980, TP01_1119, TP02_0750, TP01_0832, TP01_0278, TP04_0050, TP04_0561, TP01_0180, TP04_0752, TP01_1007, TP03_0011, TP02_0061, TP05_0013, TP01_1004, TP02_0162, TP05_0015, TP05_0016, TP03_0837, TP05_0018, TP04_0333, TP02_0370, TP04_0332, TP01_1121, TP05_0012, TP01_1127, TP04_0338, TP05_0011, TP02_0167, TP02_0937, TP01_0166, TP01_0827, TP04_0242, TP01_0460, TP01_1092, TP01_0461, TP0…	545	355	1325	1.15054	0.66825	0.241068	5.72252
GOTERM_CC_ALL	GO:0005622~intracellular	291	17.6792	0.00651586	TP01_0988, TP01_0989, TP02_0651, TP01_1213, TP01_0980, TP01_1119, TP02_0750, TP01_0278, TP02_0253, TP01_0180, TP02_0063, TP02_0061, TP02_0162, TP02_0768, TP02_0370, TP02_0769, TP01_1121, TP01_1127, TP02_0937, TP02_0167, TP01_0166, TP02_0930, TP01_1092, TP01_0460, TP01_0461, TP03_0191, TP02_0560, TP01_0797, TP01_0794, TP01_0272, TP02_0171, TP02_0568, TP01_0799, TP02_0464, TP02_0177, TP02_0927, TP0…	545	651	1325	1.08675	0.794436	0.271232	8.10188
GOTERM_CC_ALL	GO:0044464~cell part	292	17.74	0.00700704	TP01_0988, TP01_0989, TP02_0651, TP01_1213, TP01_0980, TP01_1119, TP02_0750, TP01_0278, TP02_0253, TP01_0180, TP02_0063, TP02_0061, TP02_0162, TP02_0768, TP02_0370, TP02_0769, TP01_1121, TP01_1127, TP02_0937, TP02_0167, TP01_0166, TP02_0930, TP01_1092, TP01_0460, TP01_0461, TP03_0191, TP02_0560, TP01_0797, TP01_0794, TP01_0272, TP02_0171, TP01_0799, TP02_0568, TP02_0464, TP02_0177, TP02_0927, TP0…	545	654	1325	1.08549	0.817622	0.246941	8.68737
GOTERM_CC_ALL	GO:0044427~chromosomal part	16	0.972053	0.0159722	TP04_0409, TP04_0500, TP04_0404, TP04_0508, TP02_0707, TP04_0677, TP01_0120, TP02_0063, TP04_0675, TP04_0745, TP03_0111, TP04_0813, TP03_0152, TP04_0322, TP04_0321, TP04_0814	545	23	1325	1.69126	0.979686	0.426867	18.7873
GOTERM_CC_ALL	GO:0043234~protein complex	95	5.77157	0.017454	TP01_0687, TP01_0988, TP01_1173, TP01_0989, TP01_0234, TP03_0730, TP01_0832, TP03_0382, TP03_0481, TP02_0253, TP03_0480, TP01_1007, TP01_0120, TP04_0106, TP04_0395, TP02_0612, TP04_0108, TP02_0162, TP04_0297, TP03_0111, TP04_0813, TP04_0292, TP04_0302, TP04_0814, TP02_0768, TP04_0333, TP04_0714, TP03_0569, TP02_0494, TP02_0839, TP04_0332, TP04_0424, TP04_0568, TP01_0927, TP02_0930, TP01_1092, TP0…	545	195	1325	1.18443	0.985894	0.41295	20.3537
GOTERM_CC_ALL	GO:0005798~Golgi-associated vesicle	6	0.36452	0.0456776	TP01_0687, TP04_0333, TP03_0480, TP04_0332, TP02_0162, TP04_0297	545	6	1325	2.43119	0.999988	0.715538	45.3525
GOTERM_CC_ALL	GO:0030660~Golgi-associated vesicle membrane	6	0.36452	0.0456776	TP01_0687, TP04_0333, TP03_0480, TP04_0332, TP02_0162, TP04_0297	545	6	1325	2.43119	0.999988	0.715538	45.3525
GOTERM_CC_ALL	GO:0044431~Golgi apparatus part	6	0.36452	0.0456776	TP01_0687, TP04_0333, TP03_0480, TP04_0332, TP02_0162, TP04_0297	545	6	1325	2.43119	0.999988	0.715538	45.3525
GOTERM_CC_ALL	GO:0005794~Golgi apparatus	7	0.425273	0.0561268	TP01_0687, TP04_0333, TP03_0480, TP04_0332, TP01_0016, TP02_0162, TP04_0297	545	8	1325	2.12729	0.999999	0.752879	52.6007
GOTERM_CC_ALL	GO:0000502~proteasome complex	19	1.15431	0.0573654	TP02_0927, TP02_0768, TP02_0839, TP01_0874, TP04_0424, TP04_0366, TP03_0446, TP01_0290, TP01_0187, TP02_0930, TP04_0438, TP02_0893, TP02_0560, TP04_0395, TP04_0827, TP04_0315, TP03_0809, TP01_0709, TP04_0292	545	32	1325	1.44352	0.999999	0.727382	53.3983
GOTERM_CC_ALL	GO:0098805~whole membrane	10	0.607533	0.0675891	TP01_0687, TP04_0333, TP03_0480, TP04_0332, TP04_0317, TP04_0731, TP02_0162, TP01_0099, TP04_0297, TP02_0688	545	14	1325	1.73657	1	0.756173	59.5246
GOTERM_CC_ALL	GO:0098588~bounding membrane of organelle	10	0.607533	0.0675891	TP01_0687, TP04_0333, TP03_0480, TP04_0332, TP04_0317, TP04_0731, TP02_0162, TP01_0099, TP04_0297, TP02_0688	545	14	1325	1.73657	1	0.756173	59.5246
GOTERM_CC_ALL	GO:0098796~membrane protein complex	27	1.64034	0.073436	TP01_0687, TP04_0436, TP01_0394, TP01_0712, TP01_0099, TP02_0034, TP03_0397, TP01_0832, TP02_0253, TP03_0480, TP01_1007, TP04_0106, TP04_0731, TP04_0108, TP02_0162, TP01_0660, TP04_0297, TP04_0333, TP03_0569, TP04_0714, TP04_0332, TP01_0389, TP02_0688, TP04_0317, TP01_0794, TP04_0649, TP03_0846	545	50	1325	1.31284	1	0.758246	62.6851
GOTERM_CC_ALL	GO:0012505~endomembrane system	20	1.21507	0.0761506	TP04_0333, TP01_0687, TP03_0142, TP02_0769, TP04_0332, TP01_0506, TP02_0115, TP01_0099, TP03_0397, TP02_0602, TP03_0480, TP02_0395, TP01_0794, TP04_0649, TP03_0411, TP04_0108, TP01_0016, TP02_0162, TP04_0297, TP03_0846	545	35	1325	1.38925	1	0.745673	64.0736
GOTERM_CC_ALL	GO:0044422~organelle part	84	5.10328	0.0809782	TP01_0687, TP01_0686, TP01_0988, TP01_1173, TP01_0989, TP01_0234, TP02_0115, TP04_0050, TP03_0577, TP03_0481, TP04_0810, TP03_0480, TP02_0063, TP01_1007, TP01_0120, TP04_0108, TP02_0162, TP04_0297, TP03_0111, TP04_0813, TP03_0837, TP02_0197, TP04_0302, TP04_0814, TP04_0458, TP01_1045, TP04_0333, TP02_0769, TP03_0269, TP04_0332, TP04_0338, TP02_0317, TP01_0324, TP04_0529, TP01_0461, TP04_0665, TP0…	545	180	1325	1.13456	1	0.743951	66.4258
GOTERM_CC_ALL	GO:0044446~intracellular organelle part	84	5.10328	0.0809782	TP01_0687, TP01_0686, TP01_0988, TP01_1173, TP01_0989, TP01_0234, TP02_0115, TP04_0050, TP03_0577, TP03_0481, TP04_0810, TP03_0480, TP02_0063, TP01_1007, TP01_0120, TP04_0108, TP02_0162, TP04_0297, TP03_0111, TP04_0813, TP03_0837, TP02_0197, TP04_0302, TP04_0814, TP04_0458, TP01_1045, TP04_0333, TP02_0769, TP03_0269, TP04_0332, TP04_0338, TP02_0317, TP01_0324, TP04_0529, TP01_0461, TP04_0665, TP0…	545	180	1325	1.13456	1	0.743951	66.4258
GOTERM_CC_ALL	GO:0043227~membrane-bounded organelle	117	7.10814	0.0887715	TP01_0988, TP01_0989, TP01_1213, TP01_0278, TP03_0382, TP03_0577, TP04_0811, TP04_0810, TP01_1008, TP01_1007, TP01_1004, TP02_0162, TP05_0015, TP03_0837, TP04_0813, TP04_0814, TP04_0333, TP02_0769, TP04_0332, TP04_0338, TP02_0930, TP01_0461, TP01_0797, TP01_0272, TP01_0799, TP04_0827, TP03_0823, TP04_0823, TP03_0077, TP03_0142, TP02_0927, TP02_0382, TP01_0517, TP04_0366, TP04_0531, TP01_0866, TP0…	545	258	1325	1.10252	1	0.754889	69.9251
GOTERM_CC_ALL	GO:0043231~intracellular membrane-bounded organelle	117	7.10814	0.0887715	TP01_0988, TP01_0989, TP01_1213, TP01_0278, TP03_0382, TP03_0577, TP04_0811, TP04_0810, TP01_1008, TP01_1007, TP01_1004, TP02_0162, TP05_0015, TP03_0837, TP04_0813, TP04_0814, TP04_0333, TP02_0769, TP04_0332, TP04_0338, TP02_0930, TP01_0461, TP01_0797, TP01_0272, TP01_0799, TP04_0827, TP03_0823, TP04_0823, TP03_0077, TP03_0142, TP02_0927, TP02_0382, TP01_0517, TP04_0366, TP04_0531, TP01_0866, TP0…	545	258	1325	1.10252	1	0.754889	69.9251
GOTERM_CC_ALL	GO:0030663~COPI-coated vesicle membrane	5	0.303767	0.0949881	TP01_0687, TP04_0333, TP04_0332, TP02_0162, TP04_0297	545	5	1325	2.43119	1	0.758475	72.4717
GOTERM_CC_ALL	GO:0030126~COPI vesicle coat	5	0.303767	0.0949881	TP01_0687, TP04_0333, TP04_0332, TP02_0162, TP04_0297	545	5	1325	2.43119	1	0.758475	72.4717
GOTERM_CC_ALL	GO:0030137~COPI-coated vesicle	5	0.303767	0.0949881	TP01_0687, TP04_0333, TP04_0332, TP02_0162, TP04_0297	545	5	1325	2.43119	1	0.758475	72.4717
GOTERM_CC_ALL	GO:0000793~condensed chromosome	5	0.303767	0.0949881	TP04_0409, TP01_0120, TP04_0500, TP04_0745, TP03_0111	545	5	1325	2.43119	1	0.758475	72.4717

## Sheet: KEGG OF UP-REGULATED GENES Piro
KEGG OF UP-REGULATED GENES IN THE PIROPLASM
Category	Term	Count	%	PValue	Genes	List Total	Pop Hits	Pop Total	Fold Enrichment	Bonferroni	Benjamini	FDR
KEGG_PATHWAY	tpv03010:Ribosome	59	1.1711	2.58374e-07	TP02_0949, TP02_0323, TP04_0388, TP02_0803, TP02_0801, TP04_0309, TP02_0064, TP04_0394, TP02_0298, TP03_0163, TP04_0421, TP04_0277, TP04_0238, TP03_0566, TP04_0711, TP03_0428, TP03_0050, TP02_0720, TP01_0924, TP01_0653, TP03_0860, TP04_0282, TP01_0560, TP01_1051, TP03_0223, TP04_0481, TP02_0487, TP04_0266, TP02_0283, TP01_0964, TP03_0716, TP01_0413, TP02_0305, TP03_0755, TP02_0083, TP01_0352, TP0…	283	88	695	1.64652	1.65358e-05	1.65358e-05	0.000262483
KEGG_PATHWAY	tpv03040:Spliceosome	47	0.93291	3.69871e-05	TP03_0436, TP04_0265, TP04_0151, TP01_0963, TP04_0348, TP04_0182, TP01_1059, TP02_0636, TP01_0432, TP02_0827, TP02_0539, TP02_0413, TP04_0751, TP03_0215, TP02_0180, TP02_0374, TP01_0642, TP04_0325, TP01_0765, TP02_0511, TP04_0358, TP01_1103, TP04_0892, TP03_0267, TP01_0087, TP04_0562, TP02_0595, TP02_0783, TP03_0373, TP01_1183, TP03_0386, TP01_0992, TP02_0148, TP01_0949, TP03_0394, TP01_0806, TP0…	283	73	695	1.58115	0.00236442	0.00118291	0.037569

## Sheet: KEGG OF UP-REGULATED GENES Schi
KEGG OF DOWN-REGULATED GENES IN SCHIZONT
Category	Term	Count	PValue	Genes	Fold Enrichment	Bonferroni	Benjamini	FDR
KEGG_PATHWAY	tpv01100:Metabolic pathways	101	0.000222546	TP04_0347, TP01_1219, TP04_0561, TP02_0253, TP03_0016, TP01_0381, TP04_0813, TP03_0837, TP04_0814, TP04_0894, TP03_0569, TP04_0334, TP03_0230, TP03_0424, TP01_1227, TP03_0628, TP02_0667, TP03_0365, TP03_0366, TP01_1199, TP02_0469, TP01_0073, TP02_0171, TP04_0620, TP03_0227, TP01_1130, TP01_0397, TP04_0436, TP05_0043, TP05_0042, TP01_0965, TP03_0758, TP02_0034, TP02_0826, TP02_0577, TP04_0731, TP0…	1.27451	0.0139241	0.0139241	0.225111
KEGG_PATHWAY	tpv00010:Glycolysis / Gluconeogenesis	14	0.00244212	TP01_0043, TP04_0219, TP01_0965, TP02_0134, TP04_0700, TP04_0690, TP04_0607, TP03_0346, TP02_0577, TP04_0383, TP04_0464, TP03_0227, TP01_0495, TP01_0101	2.03684	0.142764	0.0741295	2.44541
KEGG_PATHWAY	tpv01200:Carbon metabolism	23	0.00281231	TP03_0230, TP01_0043, TP04_0219, TP01_0210, TP01_0965, TP03_0628, TP04_0700, TP02_0134, TP04_0690, TP03_0758, TP04_0607, TP03_0346, TP01_0677, TP02_0577, TP01_0193, TP04_0383, TP04_0464, TP04_0620, TP03_0227, TP01_0101, TP01_0495, TP01_1050, TP03_0124	1.67312	0.162576	0.0574267	2.81135
KEGG_PATHWAY	tpv01130:Biosynthesis of antibiotics	31	0.00932677	TP01_0210, TP01_0965, TP04_0700, TP02_0134, TP03_0758, TP02_0203, TP04_0607, TP01_0956, TP02_0577, TP01_0101, TP01_0495, TP02_0928, TP03_0230, TP01_0043, TP04_0219, TP04_0719, TP03_0628, TP04_0690, TP02_0667, TP03_0346, TP03_0365, TP01_0677, TP02_0422, TP01_0193, TP04_0383, TP04_0464, TP04_0620, TP03_0227, TP01_0633, TP03_0124, TP01_1050	1.44665	0.445863	0.137212	9.05195
KEGG_PATHWAY	tpv01110:Biosynthesis of secondary metabolites	38	0.0127885	TP01_1171, TP01_0210, TP03_0594, TP01_0965, TP01_1219, TP04_0700, TP03_0730, TP02_0134, TP03_0758, TP02_0203, TP04_0607, TP01_0956, TP02_0577, TP01_0727, TP02_0197, TP01_0101, TP01_0495, TP03_0230, TP01_0043, TP04_0219, TP04_0719, TP03_0628, TP04_0690, TP02_0667, TP03_0346, TP01_0677, TP03_0365, TP02_0422, TP01_0193, TP01_0302, TP04_0383, TP04_0464, TP04_0620, TP01_0633, TP03_0227, TP01_1053, TP0…	1.36211	0.55553	0.149707	12.2191
KEGG_PATHWAY	tpv03410:Base excision repair	11	0.0175533	TP01_0968, TP01_0386, TP01_0899, TP03_0445, TP02_0912, TP03_0549, TP02_0469, TP04_0813, TP02_0276, TP02_0600, TP04_0814	1.94331	0.672308	0.169682	16.4158
KEGG_PATHWAY	tpv00240:Pyrimidine metabolism	31	0.0184748	TP05_0043, TP05_0042, TP03_0016, TP01_0126, TP01_0381, TP02_0276, TP04_0813, TP03_0528, TP04_0303, TP04_0814, TP04_0334, TP02_0838, TP01_0386, TP03_0424, TP01_0899, TP04_0471, TP04_0504, TP03_0746, TP03_0048, TP02_0319, TP04_0529, TP01_0809, TP02_0422, TP04_0648, TP03_0202, TP02_0469, TP01_0073, TP02_0171, TP01_1133, TP05_0028, TP05_0029	1.39405	0.691119	0.154501	17.2062
KEGG_PATHWAY	tpv00230:Purine metabolism	29	0.0494825	TP05_0043, TP05_0042, TP02_0134, TP02_0203, TP04_0607, TP04_0614, TP01_0126, TP03_0016, TP02_0276, TP04_0813, TP03_0528, TP04_0303, TP04_0814, TP01_1200, TP04_0334, TP01_0386, TP03_0424, TP01_0899, TP04_0471, TP03_0746, TP04_0529, TP01_0809, TP02_0422, TP04_0648, TP03_0202, TP02_0469, TP05_0028, TP05_0029, TP01_0633	1.32826	0.959122	0.329443	40.1817
KEGG_PATHWAY	tpv00190:Oxidative phosphorylation	19	0.064264	TP04_0436, TP03_0569, TP04_0714, TP03_0230, TP01_0683, TP04_0347, TP01_0210, TP03_0594, TP01_0389, TP02_0034, TP02_0045, TP02_0253, TP04_0384, TP04_0317, TP04_0731, TP02_0061, TP04_0913, TP03_0837, TP01_0588	1.42403	0.984771	0.371836	48.9599
KEGG_PATHWAY	tpv03050:Proteasome	19	0.064264	TP02_0927, TP02_0768, TP02_0839, TP01_0874, TP04_0424, TP04_0366, TP03_0446, TP01_0290, TP01_0187, TP02_0930, TP04_0438, TP02_0893, TP02_0560, TP04_0298, TP04_0395, TP04_0827, TP04_0315, TP03_0809, TP04_0292	1.42403	0.984771	0.371836	48.9599
KEGG_PATHWAY	tpv00970:Aminoacyl-tRNA biosynthesis	29	0.0810937	TP01_0518, TP02_0322, TP04_0367, TP01_1212, TP04_0389, TP01_0957, TP03_0065, TP01_0727, TP01_0760, TP01_1004, TP03_0137, TP02_0435, TP04_0776, TP04_0894, TP02_0310, TP01_1024, TP04_0470, TP02_0167, TP01_0166, TP03_0387, TP01_0161, TP04_0592, TP04_0871, TP01_0460, TP04_0572, TP03_0416, TP04_0622, TP01_1053, TP02_0746	1.28082	0.995146	0.413039	57.5281
KEGG_PATHWAY	tpv01230:Biosynthesis of amino acids	12	0.0897375	TP02_0577, TP04_0383, TP01_0965, TP03_0628, TP04_0700, TP02_0134, TP04_0690, TP04_0464, TP04_0620, TP01_0101, TP04_0607, TP01_1050	1.56209	0.997324	0.416372	61.4042
KEGG_PATHWAY	tpv00020:Citrate cycle (TCA cycle)	9	0.0993828	TP03_0230, TP01_0677, TP01_0210, TP04_0620, TP03_0227, TP03_0758, TP01_0495, TP01_1050, TP03_0124	1.71229	0.998632	0.422787	65.3507
