# Supplementary material for: Comparative Transcriptomics of the Bovine Apicomplexan Parasite Theileria parva Developmental Stages Reveals Massive Gene Expression Variation and Potential Vaccine Antigens
Source: Front Vet Sci. 2020 Jun 9;7:287. doi: 10.3389/fvets.2020.00287 (PMC7296165; doi:10.3389/fvets.2020.00287)
Supplement: Supplementary Data File 4 — Genes with similar expression pattern to the known antigens. [file Data_Sheet_4.xlsx]

## Sheet: Sheet2
Locus ID	GeneBank Acc. Number	sporoblast	sporozoite	schizonta	schizontb	piroplasm	Product Name	clusters.clustering	Domain	Sub_cellular Localization
Tp1	XP_762973.1	49	1013.6	228.3	319.8	200.8	CD8+ T cell target antigen		1 TMD, SP	golgi apparatus
TP03_0125	XP_763143.1	66	836.4	298.5	402	180.4	Hypothetical protein	Tp1	4 TMD	Plasma membrane
TP03_0513	XP_763541.1	150.2	800	334.7	296.1	199.2	Hypothetical protein	Tp1	5 TMD	Plasma membrane
TP02_0142	XP_764711.1	111.1	859.9	262.4	132.6	239.1	Ubiquitin-like domain-containing protein	Tp1	1 TMD	Extracellular space
TP02_0942	XP_765510.1	31	848.8	323.2	419.2	76.6	Hypothetical protein	Tp1	3 TMD	Plasma membrane
Tp2	XP_765583.1	309	1427.6	625.3	532.8	38.9	CD8+ T cell target antigen		SP	Extracellular space
TP03_0861	XP_762986	22.5	1620.3	356.8	216.8	71	p150 microsphere antigen	Tp2	SP	Lysosome
TP03_0167	XP_763185.1	56.7	1701.9	177.1	225.9	605.3	Hypothetical protein	Tp2	3 TMD	Plasma membrane
TP03_0544	XP_763572.1	32	1567.5	360.1	202.8	97.7	Hypothetical protein	Tp2	10 TMD	Plasma membrane
TP04_0056	XP_763691.1	159.5	1491.4	282.4	265.2	332.6	Hypothetical protein	Tp2	1 TMD	Plasma membrane
TP04_0241	XP_763876.1	201	1528.4	178.5	156.8	371.5	MI domain-containing protein	Tp2	4 TMD	Nucleus
TP02_0232	XP_764798.1	502.8	1387.2	265.7	274	18.8	Hypothetical protein	Tp2	11 TMD	Plasma membrane
TP02_0791	XP_765358.1	227.8	1427.1	287.3	217.1	109.1	Hypothetical protein	Tp2	3 TMD	Peroxisome
TP01_0379	XP_765906	57.7	1455.4	187.5	414.2	651.8	Hypothetical protein	Tp2	SP	Extracellular space
TP01_0793	XP_766314.1	150.9	1620.3	693.4	489	422.7	Hypothetical protein	Tp2	1 TMD	Mitochondion
Tp3	XP_766389.1	387.7	29.8	17	25.3	175.5	CD8+ T cell target antigen Tp3		SP	Extracellular space-nucleus
TP03_0689	XP_762813.1	378.4	24.6	68.4	34.5	143.7	Hypothetical protein	Tp3	6 TMD	Plasma membrane
TP03_0822	XP_762946	328.8	21.4	78.9	47.1	69.2	Hypothetical protein	Tp3	SP	Plasma membrane
TP03_0136	XP_763154	338.3	58.3	73.7	83.3	189.9	Hypothetical protein	Tp3	SP	Extracellular space
TP03_0184	XP_763202.1	256.1	32	77.9	71.1	55.8	Hypothetical protein	Tp3	2 TMD	Plasma membrane
TP03_0189	XP_763207	337.9	44.6	79.1	69	194.2	Hypothetical protein	Tp3	SP	Extracellular space
TP03_0304	XP_763322.1	256.4	47.1	83.9	66.1	35.1	Hypothetical protein	Tp3	3 TMD	Plasma membrane
TP03_0325	XP_763343	365.1	47.9	13.5	31.3	161.9	Hypothetical protein	Tp3	SP	Extracellular space
TP03_0455	XP_763475.1	238.3	16.6	61.3	63.9	119.1	Hypothetical protein	Tp3	SP, 6TMD	Plasma membrane
TP04_0053	XP_763688.1	266	24.4	94	33.9	62.3	Hypothetical protein	Tp3	3 TMD	Plasma membrane
TP04_0081	XP_763716.1	277.4	22.5	98.6	124.5	40.9	Hypothetical protein	Tp3	7 TMD	Plasma membrane
TP04_0390	XP_764025	373	13.7	53.3	30.5	135.1	Hypothetical protein	Tp3	SP	Mitochondion
TP04_0448	XP_764083.1	275.6	21.5	27.9	24.9	75.9	Hypothetical protein	Tp3	8 TMD	Plasma membrane
TP04_0533	XP_764168.1	362.8	20.5	106.8	121.2	94.9	Hypothetical protein	Tp3	1 TMD	Nucleus
TP04_0794	XP_764431.1	244.9	80.6	47.2	66.3	49.4	Hypothetical protein	Tp3	1 TMD	Nucleus
TP02_0446	XP_765012.1	367.8	25.9	83.1	52.6	232.4	Palmitoyltransferase (EC 2.3.1.225)	Tp3	4 TMD	Plasma membrane
TP02_0562	XP_765128.1	252.1	27.9	42.8	68.2	122.9	RHOMBOID-like protein (EC 3.4.21.-) (Rhomboid-like protein)	Tp3	6 TMD	Nucleus
TP02_0615	XP_765181.1	345	173.9	13.6	8.8	31.1	RING-type domain-containing protein	Tp3	7 TMD	Plasma membrane
TP02_0806	XP_765373.1	294.1	45.4	100.6	114	171.1	Hypothetical protein	Tp3	4 TMD	Plasma membrane
TP02_0872	XP_765440	403.9	19.4	1	1.9	62.2	Hypothetical protein	Tp3	SP	Lysosome
TP02_0908	XP_765476.1	272.7	36.6	49.7	50.7	187.3	Hypothetical protein	Tp3	4 TMD	Golgi apparatus
TP01_0081	XP_765608.1	287.1	11.1	14.7	35.9	170.2	Hypothetical protein	Tp3	1 TMD	Plasma membrane
TP01_0761	XP_766282.1	337.5	15.7	39.3	45.2	141.4	Hypothetical protein	Tp3	3 TMD	cytoplasm
TP01_1020	XP_766541.1	268.2	28.1	33.7	50.9	75.8	Hypothetical protein	Tp3	3TMD	Plasma membrane
TP01_1200	XP_766721.1	295.2	22.2	96.6	48.7	12.8	Phosphodiesterase (EC 3.1.4.-)	Tp3	7 TMD	Plasma membrane
Tp4	XP_763228.1	256.2	462.8	248.5	308.8	198.7	T-complex protein 1 subunit eta		(-)	Cytoplasm
TP03_0038	XP_763057	203.5	376.3	416.6	324.7	145.3	Hypothetical protein	Tp4	SP	Extracellular space
TP03_0895	XP_763368.1	60.5	307.5	432.2	255.6	121.4	Folate/biopterin transporter, putative	Tp4	12 TMD	Plasma membrane
TP03_0168	XP_763186.1	90.7	436.8	638.7	358.4	107.8	Hypothetical protein	Tp4	SP, 1TMD	Plasma membrane
TP04_0803	XP_764440.1	97.8	369.5	318.2	236.2	204.8	TPT domain-containing protein	Tp4	8 TMD	Peroxisome
TP04_0817	XP_764454.1	267.9	522.2	301	290.8	188.5	Hypothetical protein	Tp4	1 TMD	mitochondion
TP02_0577	XP_765143.1	181.2	455.3	237.5	279.9	220.3	Probable ATP-dependent 6-phosphofructokinase (ATP-PFK) (Phosphofructokinase) (EC 2.7.1.11) (Phosphohexokinase)	Tp4	2 TMD, NLS	Cytoplasm
TP02_0954	XP_765521	3.7	639.9	485.8	156.6	2.5	Hypothetical protein	Tp4	SP	Plasma membrane
TP01_0091	XP_765618.1	97.8	479.2	349.1	242.4	180.5	Hypothetical protein	Tp4	1 TMD	Peroxisome
TP01_0506	XP_766026.1	145.2	556.3	241.8	194.8	162.4	GOLD domain-containing protein	Tp4	SP, 1TMD	Extracellular space
TP01_0957	XP_766478	185	581.2	280.2	251.4	96.9	Threonyl-tRNA synthetase, putative	Tp4	SP	Cytoplasm
Tp5	XP_765334.1	702.1	503.3	292.6	248.6	174.6	Translation initiation factor eIF-1A		(-)	Plasma membrane
TP04_0317	XP_763952.1	752.4	358.1	269.9	312	223.6	V-type proton ATPase proteolipid subunit	Tp5	3 TMD	Vacuolar, cytoplasm
TP04_0895	XP_764532.1	487.1	573.2	361.4	252.7	330.1	RING-type domain-containing protein	Tp5	1 TMD	Peroxisome
TP02_0353	XP_764919	544.7	451.7	217.6	305.6	221.3	Thioredoxin domain-containing protein	Tp5	SP	Endoplasmic retuculum
TP02_0417	XP_764983.1	548.1	272.1	325.4	306.2	283.4	Hypothetical protein	Tp5	4 TMD	Plasma membrane
TP03_0852	XP_762976.1	746.6	469.6	328.8	328.5	492.8	Protein transport protein Sec61, putative	Tp5	8 TMD	plasma membrane
TP02_0566	XP_765132	924.8	664.4	90.1	242.5	111.6	Hypothetical protein	Tp5	SP	extracellular space
TP02_0654	XP_765220.1	512.8	457.4	372.6	425.9	144.4	Hypothetical protein	Tp5	2 TMD	Plasma membrane
TP01_0129	XP_765656	509.2	463	287	275.3	309.6	Protein disulfide isomerase, putative	Tp5	SP	Endoplasmic retuculum
TP01_0911	XP_766432	518.1	492.2	461.5	443.9	72.6	Hypothetical protein	Tp5	SP	extracellular space
TP01_1195	XP_766716.1	527	524.3	455.3	455.6	265.1	Cop-coated vesicle membrane protein p24, putative	Tp5	2 TMD	Plasma membrane
TP01_1219	XP_766740.1	448.9	388.9	256.5	425.9	349.4	Phosphatidylserine decarboxylase, putative	Tp5	1 TMD	Plasma membrane
Tp6	XP_765715.1	475.6	261.3	275.2	247.9	150.8	Prohibitin		SP	Mitochondion
TP03_0804	XP_762928.1	402.1	282.4	180.2	133.1	53.5	Signal peptidase I (EC 3.4.21.89)	Tp6	1 TMD	Endoplasmic retuculum
TP03_0568	XP_763596.1	323.1	329.3	263.7	237.4	156.5	Hypothetical protein	Tp6	1 TMD	Peroxisome
TP03_0610	XP_763638.1	393.4	257.5	267.4	245.7	129.8	Hypothetical protein	Tp6	1 TMD	golgi apparatus
TP02_0265	XP_764831.1	357	292.7	313.6	228	201.6	Hypothetical protein	Tp6	1 TMD	Mitochondion
TP02_0393	XP_764959.1	335.7	365.7	164.9	223.8	228.1	Translocation protein sec62, putative	Tp6	2 TMD	Endoplasmic retuculum
TP02_0482	XP_765048.1	267.3	434.7	183.5	165.3	253.6	Hypothetical protein	Tp6	1 TMD	Nucleus
TP02_0668	XP_765234.1	307.1	246.6	291.2	249.9	215.1	PlsC domain-containing protein	Tp6	1 TMD	Plasma membrane
TP02_0794	XP_765361.1	305.8	338.1	199.7	212.7	148.9	VHS domain-containing protein	Tp6	1 TMD	Nucleus
TP01_0025	XP_765552.1	302.2	239.1	297.1	209.6	202.1	CS domain-containing protein	Tp6	1 TMD	Endoplasmic retuculum
TP01_0253	XP_765780.1	453	282.4	215.5	190.4	331.7	Hypothetical protein	Tp6	2 TMD	Plasma membrane
TP01_0526	XP_766046.1	484.7	443.8	142.1	122.7	111.6	t-SNARE coiled-coil homology domain-containing protein	Tp6	1 TMD	Cytoplasm
Tp7	XP_764810.1	3049.4	2191.9	996.5	2033.9	1067.4	Heat shock protein 90		NLS	Nucleus - Cytoplasm
TP01_0653	XP_766174	4265	2701.1	2008.8	1596	1991.1	40S ribosomal protein S25	Tp7	NLS	Nucleus
TP04_0076	XP_763711.1	4951.8	607.7	727.2	907.3	1097.3	Hypothetical protein	Tp7	2 TMD	Plasma membrane
Tp8	XP_764709.1	1219.8	784.5	2340.1	3043.8	2739.9	cysteine proteinase		TMD	Nucleus
Tp9	XP_765463.1	13.3	4850.7	1805.4	708	5.4	Hypothetical protein		SP	Nucleus
TP02_0213	XP_764778	16.3	5317.4	831.7	357.1	31.8	Hypothetical protein	Tp9	SP	Extracellular space
TP02_0214	XP_764780	1	4649.9	317	34.4	1.7	Hypothetical protein	Tp9	SP	endoplasmic retuculum
Tp10	XP_764408.1	1021.1	348.1	463.8	300.3	289.6	Coronin		(-)	Cytoplasm
TP02_0066	XP_764635.1	901.3	46.4	345.1	272.6	45.6	Hypothetical protein	Tp10	2 TMD	peroxisome
TP02_0141	XP_764710.1	761.7	371	364.3	410.1	267.3	Adenine nucleotide translocase, putative	Tp10	4 TMD	cytoplasm
TP02_0256	XP_764822.1	956.9	221.6	539.2	587.6	238	Hypothetical protein	Tp10	1 TMD	Extracellular space
p67	XP_763305.1	17464.5	840.2	21	2.9	2.2	Hypothetical protein		SP, 1 TMD	Plasma membrane
PIM	XP_763686.1	150.9	3491.9	3244.8	2660.9	905.3	polymorphic immunodominant molecule		SP, 3 TMD	Plasma membrane
gp34	XP_766460.1	24	261.2	113.1	100.9	113.4	Hypothetical protein		SP, 1 TMD	Extracellular space
TP03_0834	XP_762958.1	93.5	285.2	144.6	141.5	131.8	Hypothetical protein	gp34	3 TMD	Plasma membrane
TP03_0673	XP_762797	27.3	250.3	192.4	215.6	131.9	Hypothetical protein	gp34	SP	Plasma membrane
TP03_0341	XP_763359.1	44.8	357.5	122.1	89.7	120.6	MFS domain-containing protein	gp34	TMD	Plasma membrane
TP03_0868	XP_762993.1	0	301.2	124.1	76.4	3.5	Hypothetical protein	gp34	1 TMD	endoplasmic retuculum
TP03_0349	XP_763369.1	110.5	230.6	109.3	83.8	121.3	Hypothetical protein	gp34	1 TMD	peroxisome
TP03_0165	XP_763183.1	18.9	366.3	123.3	131.3	2.9	ABC transporter, putative	gp34	9 TMD	Nucleus
TP03_0179	XP_763197.1	47.5	224.3	211.4	97.4	28.6	Hypothetical protein	gp34	1 TMD	golgi apparatus
TP03_0898	XP_763483	11.1	336.2	214	272.3	139.7	Hypothetical protein	gp34	SP	Plasma membrane
TP03_0003	XP_763021	1	367.5	287.5	93.7	1	Hypothetical protein	gp34	SP	Extracellular space
TP04_0016	XP_763651	0.6	280.2	129.7	102.9	0.8	Hypothetical protein	gp34	SP	cytoplasm
TP04_0138	XP_763773.1	155.2	300.3	175.6	113.3	99.7	Hypothetical protein	gp34	2 TMD	Cytoplasm
TP04_0907	XP_764544.1	3.2	336.3	102.1	90.7	6.4	Hypothetical protein	gp34	18 TMD	Peroxisome
TP04_0002	XP_764564	0	281.2	362.7	103.8	1.5	Hypothetical protein	gp34	SP	Plasma membrane
TP02_0183	XP_764747.1	61.7	287.7	150.7	111.7	97	Hypothetical protein	gp34	9 TMD	plasma membrane
TP02_0460	XP_765026.1	78.2	250.3	135.8	111.6	105.6	ABC transporter, putative	gp34	5 TMD	Plasma membrane
TP02_0738	XP_765305.1	44.1	230.1	168	158.7	65.2	Hypothetical protein	gp34	1 TMD	cytoplasm
TP02_0887	XP_765455.1	38.6	295.9	244.6	95.3	102	THUMP domain-containing protein	gp34	1 TMD	nucleus
TP01_0341	XP_765868.1	21.7	317.7	189.1	167.9	79.2	Palmitoyltransferase (EC 2.3.1.225)	gp34	4 TMD	plasma membrane
TP01_0378	XP_765905	25.1	363.3	118.6	184.4	6.5	Hypothetical protein	gp34	SP	Endoplasmic retuculum
TP01_0509	XP_766029.1	103.5	339.1	134.1	163.4	99.1	Hypothetical protein	gp34	SP, 1 TMD	Extracellular space
TP01_0601	XP_766122.1	12.6	351.7	236.2	119.8	53.3	ThiF domain-containing protein	gp34	2 TMD	mitochondion
TP01_1013	XP_766534.1	146.2	310.4	96.2	88.4	164.7	MtN3/RAG1IP protein, putative	gp34	SP, 7 TMD	plasma membrane
TP01_1136	XP_766657.1	40.6	226.7	124.2	129.3	100.3	Hypothetical protein	gp34	8 TMD	Plasma membrane
TP01_1163	XP_766684.1	60.8	308.2	260.3	232.8	34.6	MFS domain-containing protein	gp34	6 TMD	peroxisome
TP01_1171	XP_766692.1	34.8	312.2	203.3	198.1	147.3	Hypothetical protein	gp34	7 TMD	endoplasmic retuculum
p104	XP_764072.1	15.8	11151.2	539.3	394.6	39.2	104 kDa antigen		SP, GIP	Extracellular space
TP04_0640	XP_764275.1	136.1	8957.2	671.3	794.4	201.9	Hypothetical protein	p104	1 TMD	Plasma membrane
PCNA 1	XP_763465.1	1225.7	102.7	271.9	336.8	102	Proliferating cell nuclear antigen		NLS	Nucleus
TP03_0106	XP_763124	1126.8	149.4	151	135.1	331.5	Hypothetical protein	PCNA 1	SP	cytoplasm
TP03_0175	XP_763193.1	1062.6	41.6	20.5	89.7	146.9	Hypothetical protein	PCNA 1	SP, TMD	Extracellular space
TP02_0065	XP_764634	1108.5	58	52	8.4	40.2	Hypothetical protein	PCNA 1	SP	endoplasmic retuculum
TP02_0128	XP_764697.1	1029.3	56.1	75.2	88.4	151.3	Hypothetical protein	PCNA 1	4 TMD	peroxisome
TP02_0792	XP_765359.1	1387.8	77	30.5	44.4	270.1	Guanosine monophosphate reductase, putative	PCNA 1	2 TMD	Plasma membrane
TP01_0365	XP_765892.1	961.1	51.2	14.2	50.9	78.7	Hypothetical protein	PCNA 1	1 TMD	Plasma membrane
PCNA 2	XP_765166.1	710.7	49.1	420.4	314.2	181.3	Proliferating cell nuclear antigen		NLS	Nucleus
TP02_0726	XP_765293.1	920.7	34.7	254.9	295.4	154.1	Hypothetical protein	PCNA 2	3 TMD	Plasma membrane
TP01_0524	XP_766044.1	857.5	88.7	191.3	409.6	112.9	Hypothetical protein	PCNA 2	1 TMD	Extracellular space

## Sheet: Sheet1
GeneBank Acc. Number	Locus ID	sporoblast	sporozoite	schizonta	schizontb	piroplasm	Product Name	clusters.clustering
Tp1		49	1013.6	228.3	319.8	200.8	CD8+ T cell target antigen
XM_758013.1	TP03_0087	164.9	838.8	348	367.8	393.9	FAD synthetase, putative (EC 2.7.7.2)	Tp1
XM_758050.1	TP03_0125	66	836.4	298.5	402	180.4	Hypothetical protein	Tp1
XM_758201.1	TP03_0276	121.1	814.6	304.6	204.5	249.5	MIF4G domain-containing protein	Tp1
XM_758428.1	TP03_0493	316.3	1016.7	430.4	330.7	303.3	USP7_C2 domain-containing protein	Tp1
XM_758448.1	TP03_0513	150.2	800	334.7	296.1	199.2	Hypothetical protein	Tp1
XM_758834.1	TP04_0292	223.8	1071.3	219.6	235.3	182.8	26S proteasome regulatory subunit, putative	Tp1
XM_759212.1	TP04_0669	299.8	917.2	127.5	149	170.3	RING-type domain-containing protein	Tp1
XM_759304.1	TP04_0761	54.7	953.5	255.1	296	51.7	Hypothetical protein	Tp1
XM_759339.1	TP04_0795	276.5	1097.4	344.6	262.4	266.3	Fibrillarin, putative	Tp1
XM_759571.1	TP02_0095	315.8	956.6	288.5	152.7	203.7	Replication protein A subunit	Tp1
XM_759618.1	TP02_0142	111.1	859.9	262.4	132.6	239.1	Ubiquitin-like domain-containing protein	Tp1
XM_759782.1	TP02_0309	37.7	790.8	190.6	266.2	370.4	Hypothetical protein	Tp1
XM_759806.1	TP02_0333	277.6	961.6	353.1	243.6	409.4	Eukaryotic translation initiation factor 6 (eIF-6)	Tp1
XM_759828.1	TP02_0355	121.8	1078.2	202.1	122.2	257.4	Pelota protein, putative	Tp1
XM_759911.1	TP02_0438	110.5	923.2	93.9	69.3	355.8	Purine nucleoside phosphorylase, putative	Tp1
XM_759953.1	TP02_0480	111	990.7	155.5	181	210.5	Splicing factor subunit	Tp1
XM_760006.1	TP02_0533	94.3	935.2	268	267.1	172.6	DEK_C domain-containing protein	Tp1
XM_760009.1	TP02_0536	86.1	736.8	375.6	257.9	22.4	Hypothetical protein	Tp1
XM_760363.1	TP02_0888	16	1186	461.3	170	7.7	Hypothetical protein	Tp1
XM_760364.1	TP02_0889	28.2	979.9	410.4	282.1	13.7	Hypothetical protein	Tp1
XM_760366.1	TP02_0891	7.1	1099	709.9	319.5	2	Hypothetical protein	Tp1
XM_760371.1	TP02_0896	26.6	1171.9	461.7	265.9	1	Hypothetical protein	Tp1
XM_760417.1	TP02_0942	31	848.8	323.2	419.2	76.6	Hypothetical protein	Tp1
XM_760477.1	TP01_0043	194.7	871.6	253	350.2	103.4	Phosphotransferase (EC 2.7.1.-)	Tp1
XM_760710.1	TP01_0276	219.5	1098.5	251.2	364.3	372.5	Translationally-controlled tumor protein homolog (TCTP)	Tp1
XM_761241.1	TP01_0813	158.6	909.2	232.9	243.1	19.5	Hypothetical protein	Tp1
XM_761374.1	TP01_0946	119.6	877.1	394.6	142.9	282.4	Ribosome biogenesis regulatory protein	Tp1
Tp2		309	1427.6	625.3	532.8	38.9	CD8+ T cell target antigen
XM_757893.1	TP03_0861	22.5	1620.3	356.8	216.8	71	p150 microsphere antigen	Tp2
XM_758092.1	TP03_0167	56.7	1701.9	177.1	225.9	605.3	Hypothetical protein	Tp2
XM_758365.1	TP03_0438	145.4	1637.4	377.7	199.8	343.5	Hypothetical protein	Tp2
XM_758374.1	TP03_0447	236	1692.9	624.6	451.8	403.7	Nucleosome assembly protein 1, putative	Tp2
XM_758479.1	TP03_0544	32	1567.5	360.1	202.8	97.7	Hypothetical protein	Tp2
XM_758579.1	TP04_0037	271.1	1411.9	192.8	190.5	374.9	GN3L_Grn1 domain-containing protein	Tp2
XM_758598.1	TP04_0056	159.5	1491.4	282.4	265.2	332.6	Hypothetical protein	Tp2
XM_758783.1	TP04_0241	201	1528.4	178.5	156.8	371.5	MI domain-containing protein	Tp2
XM_759104.1	TP04_0562	273.4	1311.7	314	243	392.8	RNA helicase, putative	Tp2
XM_759155.1	TP04_0613	179	1753.5	254.3	212.9	367.8	Hypothetical protein	Tp2
XM_759241.1	TP04_0698	172.4	1221.5	277.5	191.1	450.2	Hypothetical protein	Tp2
XM_759582.1	TP02_0106	182.3	1604.5	465	354.2	196.1	Sm protein, putative	Tp2
XM_759705.1	TP02_0232	502.8	1387.2	265.7	274	18.8	Hypothetical protein	Tp2
XM_759989.1	TP02_0516	134.7	1668.6	201.1	145.7	285.2	Hypothetical protein	Tp2
XM_760265.1	TP02_0791	227.8	1427.1	287.3	217.1	109.1	Hypothetical protein	Tp2
XM_760813.1	TP01_0379	57.7	1455.4	187.5	414.2	651.8	Hypothetical protein	Tp2
XM_760970.1	TP01_0543	131.4	1569.3	217.2	151.3	374	Transcription factor, putative	Tp2
XM_761221.1	TP01_0793	150.9	1620.3	693.4	489	422.7	Hypothetical protein	Tp2
XM_761393.1	TP01_0965	414.8	1470.6	526.1	387.3	209.2	Phosphoglycerate kinase (EC 2.7.2.3)	Tp2
Tp3		387.7	29.8	17	25.3	175.5	CD8+ T cell target antigen
XM_757671.1	TP03_0640	370.2	27.4	53.7	184.3	91.7	BACK domain-containing protein	Tp3
XM_757720.1	TP03_0689	378.4	24.6	68.4	34.5	143.7	Hypothetical protein	Tp3
XM_757758.1	TP03_0727	234.4	20.6	13.4	20.5	128.5	Hypothetical protein	Tp3
XM_757773.1	TP03_0742	358.2	36.4	73.9	42	138.4	Hypothetical protein	Tp3
XM_757853.1	TP03_0822	328.8	21.4	78.9	47.1	69.2	Hypothetical protein	Tp3
XM_757864.1	TP03_0833	347.2	44.3	72.6	94.3	32	Hypothetical protein	Tp3
XM_757938.1	TP03_0011	288.2	33.2	101.8	139.6	71.6	40S ribosomal protein L17, putative	Tp3
XM_757962.1	TP03_0036	252.4	65	98.2	103.8	73.6	RRM domain-containing protein	Tp3
XM_757986.1	TP03_0060	252.4	39.4	10.2	19.5	249.6	Hypothetical protein	Tp3
XM_758021.1	TP03_0096	323.9	15.6	89.6	104	28.3	CRAL-TRIO domain-containing protein	Tp3
XM_758029.1	TP03_0104	287.6	34.9	1.9	1.1	7.1	Hypothetical protein	Tp3
XM_758061.1	TP03_0136	338.3	58.3	73.7	83.3	189.9	Hypothetical protein	Tp3
XM_758066.1	TP03_0141	265.8	20.5	73.6	20.2	73.3	Hypothetical protein	Tp3
XM_758075.1	TP03_0150	286	23.7	126	77.5	112.4	Hypothetical protein	Tp3
XM_758109.1	TP03_0184	256.1	32	77.9	71.1	55.8	Hypothetical protein	Tp3
XM_758114.1	TP03_0189	337.9	44.6	79.1	69	194.2	Hypothetical protein	Tp3
XM_758145.1	TP03_0220	307.1	50.6	31.8	49.3	103	Inosine-5'-monophosphate dehydrogenase (IMP dehydrogenase) (IMPD) (IMPDH) (EC 1.1.1.205)	Tp3
XM_758150.1	TP03_0225	274	90.1	83.6	97.9	65.5	Skp1 protein, putative	Tp3
XM_758152.1	TP03_0227	272.9	16.4	37.4	74.1	45.9	Dihydrolipoyl dehydrogenase (EC 1.8.1.4)	Tp3
XM_758180.1	TP03_0255	333.9	23.1	63.4	38.8	60	Hypothetical protein	Tp3
XM_758229.1	TP03_0304	256.4	47.1	83.9	66.1	35.1	Hypothetical protein	Tp3
XM_758250.1	TP03_0325	365.1	47.9	13.5	31.3	161.9	Hypothetical protein	Tp3
XM_758253.1	TP03_0328	346.5	28.8	99	69.4	17	Ribosomal_L12_N domain-containing protein	Tp3
XM_758273.1	TP03_0347	247.9	23.4	30.5	82.4	32.6	DUF676 domain-containing protein	Tp3
XM_758319.1	TP03_0392	358.4	15.9	22.9	33.1	28.4	Hypothetical protein	Tp3
XM_758382.1	TP03_0455	238.3	16.6	61.3	63.9	119.1	Hypothetical protein	Tp3
XM_758411.1	TP03_0477	391.7	31.8	1.3	0.8	6.8	Hypothetical protein	Tp3
XM_758470.1	TP03_0535	267	34.8	9.8	39.6	199.4	Hypothetical protein	Tp3
XM_758595.1	TP04_0053	266	24.4	94	33.9	62.3	Hypothetical protein	Tp3
XM_758623.1	TP04_0081	277.4	22.5	98.6	124.5	40.9	Hypothetical protein	Tp3
XM_758657.1	TP04_0115	323.9	14.9	2.3	33.9	7	Hypothetical protein	Tp3
XM_758697.1	TP04_0155	315.2	22.6	11	32.4	58.8	Hypothetical protein	Tp3
XM_758698.1	TP04_0156	303.8	16.9	124.7	83.5	30.7	Hypothetical protein	Tp3
XM_758776.1	TP04_0234	357.8	60	97.8	65.9	174.9	Hypothetical protein	Tp3
XM_758787.1	TP04_0245	318.6	24	10.7	25.7	38.4	Hypothetical protein	Tp3
XM_758813.1	TP04_0271	260.8	120.5	74	87.8	80.6	Hypothetical protein	Tp3
XM_758888.1	TP04_0346	272.9	35.6	16.5	33.3	76.9	Hypothetical protein	Tp3
XM_758932.1	TP04_0390	373	13.7	53.3	30.5	135.1	Hypothetical protein	Tp3
XM_758934.1	TP04_0392	299.2	63.7	106.2	102.3	129	50S ribosomal protein L14, putative	Tp3
XM_758950.1	TP04_0408	398.8	18.2	1.6	1.5	8.5	Hypothetical protein	Tp3
XM_758951.1	TP04_0409	293.6	18.1	56.1	116.3	59	Structural maintenance of chromosomes protein	Tp3
XM_758965.1	TP04_0423	240.7	18.9	43.7	32.9	32.9	Serine/threonine-protein phosphatase (EC 3.1.3.16)	Tp3
XM_758990.1	TP04_0448	275.6	21.5	27.9	24.9	75.9	Hypothetical protein	Tp3
XM_759020.1	TP04_0478	229.5	11.5	45.8	32.2	39.7	Hypothetical protein	Tp3
XM_759075.1	TP04_0533	362.8	20.5	106.8	121.2	94.9	Hypothetical protein	Tp3
XM_759077.1	TP04_0535	278.1	14.1	4.9	22.1	106.5	Hypothetical protein	Tp3
XM_759097.1	TP04_0555	301.8	12.1	73	51.6	31.8	RING-type domain-containing protein	Tp3
XM_759111.1	TP04_0569	344.4	26.3	64.8	60.3	108.5	Hypothetical protein	Tp3
XM_759289.1	TP04_0746	306.9	35.5	60.9	49.8	91	Hypothetical protein	Tp3
XM_759338.1	TP04_0794	244.9	80.6	47.2	66.3	49.4	Hypothetical protein	Tp3
XM_759431.1	TP04_0887	268.1	21.1	8.5	2.7	1.4	Hypothetical protein	Tp3
XM_759443.1	TP04_0899	310.1	28.9	61.9	53.6	50.9	CRAL-TRIO domain-containing protein	Tp3
XM_759528.1	TP02_0052	233.8	14.8	37.9	31.8	74	Hypothetical protein	Tp3
XM_759634.1	TP02_0163	281.6	40.2	3.7	36.2	100.5	AP2/ERF domain-containing protein	Tp3
XM_759639.1	TP02_0168	247.7	23.9	25	61.7	172.8	Hypothetical protein	Tp3
XM_759723.1	TP02_0250	233.1	11	65.9	33.7	184	Hypothetical protein	Tp3
XM_759787.1	TP02_0314	380.3	22	11.6	23.6	64.8	Hypothetical protein	Tp3
XM_759919.1	TP02_0446	367.8	25.9	83.1	52.6	232.4	Palmitoyltransferase (EC 2.3.1.225)	Tp3
XM_759943.1	TP02_0470	367.5	51.6	13.4	39.2	69.5	Hypothetical protein	Tp3
XM_759972.1	TP02_0499	357.5	21	62.1	94.3	106.4	Hypothetical protein	Tp3
XM_760035.1	TP02_0562	252.1	27.9	42.8	68.2	122.9	RHOMBOID-like protein (EC 3.4.21.-) (Rhomboid-like protein)	Tp3
XM_760049.1	TP02_0576	233.2	74.9	25.3	34.6	55.7	Guanylate kinase, putative	Tp3
XM_760052.1	TP02_0579	235.9	77.6	73.6	73.9	34.3	Hypothetical protein	Tp3
XM_760059.1	TP02_0586	267.2	37.7	126.7	89.9	55.8	Hypothetical protein	Tp3
XM_760088.1	TP02_0615	345	173.9	13.6	8.8	31.1	RING-type domain-containing protein	Tp3
XM_760089.1	TP02_0616	337.6	53.3	89.7	84.4	39.8	Hypothetical protein	Tp3
XM_760138.1	TP02_0665	230.3	28.7	64.8	48.6	26.8	Hypothetical protein	Tp3
XM_760158.1	TP02_0685	248.5	11	45.5	65.7	36.7	Kinesin-like protein	Tp3
XM_760186.1	TP02_0712	349.2	57.4	67.3	95.3	71.6	Hypothetical protein	Tp3
XM_760280.1	TP02_0806	294.1	45.4	100.6	114	171.1	Hypothetical protein	Tp3
XM_760346.1	TP02_0871	297.7	58.9	10.2	38.7	71.1	Hypothetical protein	Tp3
XM_760347.1	TP02_0872	403.9	19.4	1	1.9	62.2	Hypothetical protein	Tp3
XM_760383.1	TP02_0908	272.7	36.6	49.7	50.7	187.3	Hypothetical protein	Tp3
XM_760391.1	TP02_0916	278.1	19	26.5	22.4	108.4	GBP domain-containing protein	Tp3
XM_760515.1	TP01_0081	287.1	11.1	14.7	35.9	170.2	Hypothetical protein	Tp3
XM_760558.1	TP01_0124	286.9	9	13.6	9.9	12.2	Hypothetical protein	Tp3
XM_760606.1	TP01_0172	305.7	44.3	51.4	48	35.2	Hypothetical protein	Tp3
XM_760609.1	TP01_0175	244.2	30	111	41.7	93.3	Hypothetical protein	Tp3
XM_760614.1	TP01_0180	374.3	19.6	114.2	87.7	38.3	40S ribosomal protein S11, putative	Tp3
XM_760673.1	TP01_0239	376.5	16.9	8.6	19.7	67.3	Hypothetical protein	Tp3
XM_760688.1	TP01_0254	254.8	25.8	92.4	64.4	129.5	Hypothetical protein	Tp3
XM_760702.1	TP01_0268	307.5	16.5	70.2	64.3	112.9	Hypothetical protein	Tp3
XM_760733.1	TP01_0299	388.6	23.3	104.5	88.9	75.8	OBG-type G domain-containing protein	Tp3
XM_760793.1	TP01_0359	285.3	21.2	9.3	25.7	72	Mitogen-activated protein kinase (EC 2.7.11.24)	Tp3
XM_760806.1	TP01_0372	345.9	20.3	45.1	61.5	128	Hypothetical protein	Tp3
XM_760841.1	TP01_0407	276.8	29.8	79.2	76.7	169.6	Hypothetical protein	Tp3
XM_760860.1	TP01_0426	294	21	100.9	79.5	106.2	Hypothetical protein	Tp3
XM_760894.1	TP01_0467	260.6	23.8	79.8	86.3	82.1	Hypothetical protein	Tp3
XM_760913.1	TP01_0486	258.4	27	30.6	60.3	22.5	VPS13_C domain-containing protein	Tp3
XM_760920.1	TP01_0493	329.4	78.1	14.5	51.9	201	Hypothetical protein	Tp3
XM_761117.1	TP01_0689	275.7	6.1	6.8	11.4	127.9	Hypothetical protein	Tp3
XM_761189.1	TP01_0761	337.5	15.7	39.3	45.2	141.4	Hypothetical protein	Tp3
XM_761279.1	TP01_0851	382.5	9.6	14.6	3.3	6.5	Hypothetical protein	Tp3
XM_761388.1	TP01_0960	230.3	27.3	35.9	68.5	134.4	Hypothetical protein	Tp3
XM_761448.1	TP01_1020	268.2	28.1	33.7	50.9	75.8	Hypothetical protein	Tp3
XM_761581.1	TP01_1153	329.2	13.1	37.3	46	16.7	Hypothetical protein	Tp3
XM_761628.1	TP01_1200	295.2	22.2	96.6	48.7	12.8	Phosphodiesterase (EC 3.1.4.-)	Tp3
Tp4		256.2	462.8	248.5	308.8	198.7	T-complex protein 1 subunit eta
XM_757675.1	TP03_0644	125.4	564.5	403.5	325.5	184.6	DNA helicase, putative	Tp4
XM_757676.1	TP03_0645	84.9	487.9	271	261.6	226.7	Hypothetical protein	Tp4
XM_757679.1	TP03_0648	222.9	570.2	381.7	352.1	234.5	Hypothetical protein	Tp4
XM_757682.1	TP03_0651	92	463.5	234.1	274.7	173.3	SH2_2 domain-containing protein	Tp4
XM_757889.1	TP03_0858	74.6	527.6	270.1	245.3	115.1	Multiprotein bridging factor type 1, putative	Tp4
XM_757964.1	TP03_0038	203.5	376.3	416.6	324.7	145.3	Hypothetical protein	Tp4
XM_758046.1	TP03_0121	170.5	320.1	285	367	84.2	HIT-type domain-containing protein	Tp4
XM_758070.1	TP03_0145	119.8	321.8	381.6	328.4	89.1	V-SNARE coiled-coil homology domain-containing protein	Tp4
XM_758275.1	TP03_0895	60.5	307.5	432.2	255.6	121.4	Folate/biopterin transporter, putative	Tp4
XM_758406.1	TP03_0472	132.4	462.8	304.5	226.8	81.9	Hypothetical protein	Tp4
XM_758765.1	TP04_0223	147.3	449.7	393.5	581.6	51.9	Hypothetical protein	Tp4
XM_758272.1	TP03_0346	231.7	685.4	434.1	482.8	142.7	Glucose-6-phosphate isomerase (EC 5.3.1.9)	Tp4
XM_758790.1	TP04_0248	221	579.5	361.4	219.4	186.5	Hypothetical protein	Tp4
XM_757661.1	TP03_0630	241.3	502.8	510.3	489.9	142	Hypothetical protein	Tp4
XM_758093.1	TP03_0168	90.7	436.8	638.7	358.4	107.8	Hypothetical protein	Tp4
XM_758823.1	TP04_0281	58.4	388.6	434.8	464.3	126.1	Hypothetical protein	Tp4
XM_759013.1	TP04_0471	134.5	480.2	340.7	262.3	148.2	RNA polymerase small subunit, putative (EC 2.7.7.6)	Tp4
XM_759260.1	TP04_0717	114.5	462.5	293.4	269.7	270	Hypothetical protein	Tp4
XM_759347.1	TP04_0803	97.8	369.5	318.2	236.2	204.8	TPT domain-containing protein	Tp4
XM_759361.1	TP04_0817	267.9	522.2	301	290.8	188.5	Hypothetical protein	Tp4
XM_759526.1	TP02_0050	300.7	504.3	277.3	247.5	168.5	Nuclear transport factor 2, putative	Tp4
XM_759600.1	TP02_0124	151	371.7	478	226.2	206.9	Methionyl-tRNA synthetase, putative	Tp4
XM_759762.1	TP02_0289	279.2	380.4	327.3	269.7	153.2	T-complex protein 1, epsilon subunit, putative	Tp4
XM_759792.1	TP02_0319	156.9	312.9	384.4	177.8	146.3	Thymidylate kinase, putative	Tp4
XM_759883.1	TP02_0410	189.6	521	252.1	204.7	88.5	Hypothetical protein	Tp4
XM_760050.1	TP02_0577	181.2	455.3	237.5	279.9	220.3	Probable ATP-dependent 6-phosphofructokinase (ATP-PFK) (Phosphofructokinase) (EC 2.7.1.11) (Phosphohexokinase)	Tp4
XM_760369.1	TP02_0894	109.2	328.1	479.2	151.7	80	Hypothetical protein	Tp4
XM_760428.1	TP02_0954	3.7	639.9	485.8	156.6	2.5	Hypothetical protein	Tp4
XM_760525.1	TP01_0091	97.8	479.2	349.1	242.4	180.5	Hypothetical protein	Tp4
XM_760535.1	TP01_0101	250	492	521.8	465.2	152.2	Fructose-bisphosphate aldolase, putative	Tp4
XM_760714.1	TP01_0280	302.6	480.6	424.9	358.5	88.3	Hypothetical protein	Tp4
XM_760769.1	TP01_0335	202.7	541.6	302.1	273.1	238.1	Eukaryotic translation initiation factor 2 gamma subunit, putative	Tp4
XM_760933.1	TP01_0506	145.2	556.3	241.8	194.8	162.4	GOLD domain-containing protein	Tp4
XM_760957.1	TP01_0530	132	513.1	563.5	182.5	313.8	cwf21 domain-containing protein	Tp4
XM_761012.1	TP01_0584	125.3	449.6	455.2	353.9	283.8	CBFD_NFYB_HMF domain-containing protein	Tp4
XM_761382.1	TP01_0954	89.2	337.8	424.5	266.8	210.7	Hypothetical protein	Tp4
XM_761385.1	TP01_0957	185	581.2	280.2	251.4	96.9	Threonyl-tRNA synthetase, putative	Tp4
XM_761399.1	TP01_0971	88.7	586.9	315.6	344.2	236.4	Hypothetical protein	Tp4
XM_761469.1	TP01_1041	91.9	349	354.6	210	182.6	ATP-dependent Clp protease proteolytic subunit	Tp4
XM_761500.1	TP01_1072	62.9	513.1	257.9	135	76.7	Queuine tRNA-ribosyltransferase catalytic subunit 1 (EC 2.4.2.29) (Guanine insertion enzyme) (tRNA-guanine transglycosylase)	Tp4
XM_761529.1	TP01_1101	137.9	513.4	294.5	181.7	183.7	GPN-loop GTPase (EC 3.6.5.-)	Tp4
XM_761569.1	TP01_1141	85.3	459.1	415.7	331	98.7	Acylphosphatase (EC 3.6.1.7)	Tp4
XM_761600.1	TP01_1172	14.4	296.8	345.3	441.6	141.9	Hypothetical protein	Tp4
Tp5		702.1	503.3	292.6	248.6	174.6	Translation initiation factor eIF-1A
XM_757763.1	TP03_0732	461.1	356.2	413.3	320.3	153.7	U6 snRNA-associated protein, putative	Tp5
XM_758219.1	TP03_0294	501.5	506.6	166.2	166.7	207.2	U2 small nuclear ribonucleoprotein, auxiliary factor, small subunit, putative	Tp5
XM_758257.1	TP03_0332	549.7	452.5	133	117.2	223	CS domain-containing protein	Tp5
XM_758258.1	TP03_0333	570.1	458	258.2	291.8	237	UBIQUITIN_CONJUGAT_2 domain-containing protein	Tp5
XM_758342.1	TP03_0415	694.7	697.6	291.3	238.5	87.4	Hypothetical protein	Tp5
XM_758650.1	TP04_0108	740	733.7	261.9	383.8	220.8	Signal peptidase, putative (EC 3.4.-.-)	Tp5
XM_758859.1	TP04_0317	752.4	358.1	269.9	312	223.6	V-type proton ATPase proteolipid subunit	Tp5
XM_758860.1	TP04_0318	564.2	413	230.3	157.5	291.3	PWI domain-containing protein	Tp5
XM_758905.1	TP04_0363	420.8	515.1	484.1	291.2	103.9	Importin N-terminal domain-containing protein	Tp5
XM_758952.1	TP04_0410	504.5	464.5	379.9	262.5	174.1	Serine/threonine protein phosphatase 2C, putative (EC 3.1.3.16)	Tp5
XM_759034.1	TP04_0492	566.9	291.4	414.8	387.9	283.1	Elongation factor 1 gamma, putative (EC 3.6.5.3)	Tp5
XM_759376.1	TP04_0832	739.2	399	294.7	247.5	246.6	Vacuolar ATP synthase subunit C, putative (EC 3.6.3.14)	Tp5
XM_759420.1	TP04_0876	749.6	477.8	184.9	199.1	392.5	Hypothetical protein	Tp5
XM_759439.1	TP04_0895	487.1	573.2	361.4	252.7	330.1	RING-type domain-containing protein	Tp5
XM_759517.1	TP02_0041	680.5	277.1	236.5	260.1	384.3	Hypothetical protein	Tp5
XM_759556.1	TP02_0080	481.4	640.6	379.9	426.3	275.9	60S ribosomal protein L29	Tp5
XM_759694.1	TP02_0221	604.4	741.4	191.4	249.6	272.4	J domain-containing protein	Tp5
XM_759826.1	TP02_0353	544.7	451.7	217.6	305.6	221.3	Thioredoxin domain-containing protein	Tp5
XM_759871.1	TP02_0398	533.7	484.4	171.3	183.9	352.3	UBA domain-containing protein	Tp5
XM_759890.1	TP02_0417	548.1	272.1	325.4	306.2	283.4	Hypothetical protein	Tp5
XM_757883.1	TP03_0852	746.6	469.6	328.8	328.5	492.8	Protein transport protein Sec61, putative	Tp5
XM_759902.1	TP02_0429	996.9	528.3	180.2	174.3	178.1	SUI1 domain-containing protein	Tp5
XM_758218.1	TP03_0293	634.3	653.9	240.3	251	389	Proteasome subunit alpha type (EC 3.4.25.1)	Tp5
XM_760039.1	TP02_0566	924.8	664.4	90.1	242.5	111.6	Hypothetical protein	Tp5
XM_757973.1	TP03_0047	656.1	345.6	229.7	254	389.7	Glycogen synthase kinase, putative (EC 2.7.11.1)	Tp5
XM_760098.1	TP02_0625	575.7	416	240.5	182.8	362.9	DnaJ protein, putative	Tp5
XM_760127.1	TP02_0654	512.8	457.4	372.6	425.9	144.4	Hypothetical protein	Tp5
XM_760452.1	TP01_0018	479.2	476.5	237.3	222.8	406.6	Hypothetical protein	Tp5
XM_760563.1	TP01_0129	509.2	463	287	275.3	309.6	Protein disulfide isomerase, putative	Tp5
XM_760570.1	TP01_0136	707.3	576.3	259.3	151.2	220.8	ADP-ribosylation factor GTPase-activating protein, putative	Tp5
XM_760588.1	TP01_0154	754	409.6	407.1	438.7	330.1	Hypothetical protein	Tp5
XM_760674.1	TP01_0240	745.9	593.6	332.2	239	337.4	C3H1-type domain-containing protein	Tp5
XM_760735.1	TP01_0301	603	318.3	205.8	164.5	220.7	Hypothetical protein	Tp5
XM_760748.1	TP01_0314	560.4	546.2	497.4	407.6	222.6	Eukaryotic translation initiation factor 3 subunit G (eIF3g) (Eukaryotic translation initiation factor 3 RNA-binding subunit) (eIF-3 RNA-binding subunit) (Eukaryotic translation initiation factor 3 subunit 4)	Tp5
XM_760755.1	TP01_0321	687.8	353.2	250.5	222.5	249.7	Hypothetical protein	Tp5
XM_760888.1	TP01_0461	466.6	518.8	339.3	272.9	228.4	Anamorsin homolog (Fe-S cluster assembly protein DRE2 homolog)	Tp5
XM_760994.1	TP01_0568	493	447.9	328.4	236.8	159.9	Methyltransf_11 domain-containing protein	Tp5
XM_760996.1	TP01_0570	630.9	371.7	271.7	396.8	300.3	CCHC-type domain-containing protein	Tp5
XM_761160.1	TP01_0732	456.2	570.6	375.2	208.5	347.8	Ubiquitin conjugating enzyme, putative (EC 6.3.2.19)	Tp5
XM_761182.1	TP01_0754	478.4	571	226.1	246.2	319	AP complex subunit sigma	Tp5
XM_761238.1	TP01_0810	773.6	623.8	307.6	300.8	359.1	ADP-ribosylation factor GTPase-activating protein, putative	Tp5
XM_761288.1	TP01_0860	792.1	447.9	250.3	246.6	485	Ubiquinol-cytochrome C reductase complex 14kD subunit (EC 1.10.2.2)	Tp5
XM_761294.1	TP01_0866	549.1	596.7	327.7	403.9	198.9	Hypothetical protein	Tp5
XM_761339.1	TP01_0911	518.1	492.2	461.5	443.9	72.6	Hypothetical protein	Tp5
XM_761356.1	TP01_0928	551.8	411.5	320.3	249	346.7	Hypothetical protein	Tp5
XM_761365.1	TP01_0937	777.2	476.9	334	349.3	166	Cell division cycle protein 48, putative	Tp5
XM_761623.1	TP01_1195	527	524.3	455.3	455.6	265.1	Cop-coated vesicle membrane protein p24, putative	Tp5
XM_761627.1	TP01_1199	783.7	538.6	232.4	208	150	Sphingomyelin/lysocholinephospholipid-phospholipase C, putative	Tp5
XM_761647.1	TP01_1219	448.9	388.9	256.5	425.9	349.4	Phosphatidylserine decarboxylase, putative	Tp5
Tp6		475.6	261.3	275.2	247.9	150.8	Prohibitin
XM_757655.1	TP03_0624	391.6	487.6	48.1	192.7	158.8	Hypothetical protein	Tp6
XM_757835.1	TP03_0804	402.1	282.4	180.2	133.1	53.5	Signal peptidase I (EC 3.4.21.89)	Tp6
XM_757943.1	TP03_0017	337.5	492.3	312.1	180.1	240.3	PUB domain-containing protein	Tp6
XM_757949.1	TP03_0023	298.4	356.4	233.8	111.1	258.9	Hypothetical protein	Tp6
XM_757951.1	TP03_0025	335.4	292.1	256.4	212.5	152.2	Ubiquitin-conjugating enzyme, putative	Tp6
XM_758001.1	TP03_0075	358.8	324.6	213.8	193.2	216	Hypothetical protein	Tp6
XM_758240.1	TP03_0315	513	297.5	96.5	118.6	251.1	Casein kinase I, putative (EC 2.7.1.-)	Tp6
XM_758312.1	TP03_0385	260.1	332.7	223.2	243.8	205.2	3'-5' exonuclease domain-containing protein	Tp6
XM_758402.1	TP03_0468	281.1	301	284.9	277.1	195.6	TRAUB domain-containing protein	Tp6
XM_758503.1	TP03_0568	323.1	329.3	263.7	237.4	156.5	Hypothetical protein	Tp6
XM_758545.1	TP03_0610	393.4	257.5	267.4	245.7	129.8	Hypothetical protein	Tp6
XM_758573.1	TP04_0031	448.7	434.8	238.8	197.7	233.8	26S proteasome aaa-ATPase subunit Rpt3, putative (EC 3.6.4.8)	Tp6
XM_758585.1	TP04_0043	321.2	261.1	171.6	128.5	204.8	Cell cycle regulator protein, putative	Tp6
XM_758651.1	TP04_0109	487.5	297.9	284.4	253.3	261.3	Prefoldin subunit 4	Tp6
XM_758654.1	TP04_0112	513.4	297.2	153.4	185.6	147.9	CTP_transf_like domain-containing protein	Tp6
XM_758760.1	TP04_0218	263	382.3	178.1	238.2	233.2	Transportin, putative	Tp6
XM_758761.1	TP04_0219	369	357.7	231.6	252.6	215.8	Acetyl-coenzyme A synthetase (EC 6.2.1.1)	Tp6
XM_758775.1	TP04_0233	429.5	322	91.2	131	153.5	TFIIS N-terminal domain-containing protein	Tp6
XM_758778.1	TP04_0236	329.6	357.2	281.3	212.8	212.7	26S proteasome regulatory subunit, putative	Tp6
XM_758785.1	TP04_0243	380	344.9	181.6	174.6	100.6	p36-like protein, putative	Tp6
XM_758837.1	TP04_0295	318.9	340.4	259.1	266.4	131.7	Dynamin, putative	Tp6
XM_758874.1	TP04_0332	385.3	314.9	247.7	212.5	138.8	Coatomer subunit delta	Tp6
XM_758927.1	TP04_0385	383.5	300.4	184.7	170.3	377.6	U1-type domain-containing protein	Tp6
XM_759089.1	TP04_0547	332.1	386.8	221.5	182.7	292.9	ZnF_CDGSH domain-containing protein	Tp6
XM_759239.1	TP04_0696	495.9	259.7	121.7	139.3	152.4	Hypothetical protein	Tp6
XM_759326.1	TP04_0783	350.6	224.1	234.4	137.2	238.6	Vacuolar sorting protein 26, putative	Tp6
XM_759346.1	TP04_0802	532	290.6	212.3	190.1	347.6	FeS_assembly_P domain-containing protein	Tp6
XM_759372.1	TP04_0828	419.3	265	236	208.1	270.3	Proteasome subunit alpha type (EC 3.4.25.1)	Tp6
XM_759373.1	TP04_0829	442.2	245.6	272	173	176.8	RING-type domain-containing protein	Tp6
XM_759521.1	TP02_0045	369.2	431.2	242.6	209.8	172.1	Cytochrome c oxidase subunit, putative	Tp6
XM_759587.1	TP02_0111	530.2	274.5	317.2	145.7	261	USP domain-containing protein	Tp6
XM_759594.1	TP02_0118	342.3	387.5	193.5	180	221.5	Hypothetical protein	Tp6
XM_759651.1	TP02_0180	313	320.7	121	127.4	268.1	Hypothetical protein	Tp6
XM_759737.1	TP02_0264	386.8	366.8	54	64.1	171.2	RRM domain-containing protein	Tp6
XM_759738.1	TP02_0265	357	292.7	313.6	228	201.6	Hypothetical protein	Tp6
XM_759750.1	TP02_0277	449.7	276.9	149	99.1	141.1	Hypothetical protein	Tp6
XM_759770.1	TP02_0297	485.7	233.3	111.4	148.6	228.6	Hypothetical protein	Tp6
XM_759777.1	TP02_0304	324.9	231.4	218.5	167.9	305	Adaptin beta subunit, putative	Tp6
XM_759866.1	TP02_0393	335.7	365.7	164.9	223.8	228.1	Translocation protein sec62, putative	Tp6
XM_759886.1	TP02_0413	387.5	277.2	255.5	190.3	226.8	DUF1716 domain-containing protein	Tp6
XM_759955.1	TP02_0482	267.3	434.7	183.5	165.3	253.6	Hypothetical protein	Tp6
XM_760003.1	TP02_0530	437.6	218.5	247.7	162.8	212.6	Hypothetical protein	Tp6
XM_760077.1	TP02_0604	450.4	380.2	158.1	204.9	448.1	Hypothetical protein	Tp6
XM_760082.1	TP02_0609	299.7	329.9	366.5	258.7	118.9	PINc domain-containing protein	Tp6
XM_760141.1	TP02_0668	307.1	246.6	291.2	249.9	215.1	PlsC domain-containing protein	Tp6
XM_760174.1	TP02_0701	494.5	283.7	233.4	216.6	262.9	Protein transport protein SEC23	Tp6
XM_760225.1	TP02_0751	480.1	326	279.7	207.3	79.6	Hypothetical protein	Tp6
XM_760258.1	TP02_0784	472.1	329.3	147.8	78.8	211.1	Cytochrome c heme lyase (EC 4.4.1.17)	Tp6
XM_760268.1	TP02_0794	305.8	338.1	199.7	212.7	148.9	VHS domain-containing protein	Tp6
XM_760298.1	TP02_0823	445	508.2	101.9	156	254.8	Hypothetical protein	Tp6
XM_760385.1	TP02_0910 TP02_0914	256.5	268.3	133.3	216.7	245	Hypothetical protein	Tp6
XM_760410.1	TP02_0935	359.5	293.6	258.8	221.9	372.5	Glucosamine-fructose-6-phosphate aminotransferase, putative	Tp6
XM_760459.1	TP01_0025	302.2	239.1	297.1	209.6	202.1	CS domain-containing protein	Tp6
XM_760489.1	TP01_0055	344.5	433.8	233.5	227.6	297.3	DEAD box RNA helicase, putative	Tp6
XM_760572.1	TP01_0138	303.6	361.8	214	217.2	201.7	Hypothetical protein	Tp6
XM_760616.1	TP01_0182	411.1	283.7	216.2	194.7	151.5	Hypothetical protein	Tp6
XM_760653.1	TP01_0219	453.9	573.1	31.3	38.5	92.4	Serine/threonine-protein phosphatase (EC 3.1.3.16)	Tp6
XM_760687.1	TP01_0253	453	282.4	215.5	190.4	331.7	Hypothetical protein	Tp6
XM_760724.1	TP01_0290	443.6	259.8	159.3	134.9	101.5	26S proteasome subunit, putative	Tp6
XM_760902.1	TP01_0475	363.2	364	265.7	319.5	154.3	PITH domain-containing protein	Tp6
XM_760915.1	TP01_0488	388.8	372.9	154.8	159.3	271	BTB domain-containing protein	Tp6
XM_760953.1	TP01_0526	484.7	443.8	142.1	122.7	111.6	t-SNARE coiled-coil homology domain-containing protein	Tp6
XM_760979.1	TP01_0553	378.3	267.1	248.2	233.8	168	Transcription elongation factor SII, putative	Tp6
XM_760992.1	TP01_0566	356.6	236.1	210.1	185.4	164.5	Brix domain-containing protein	Tp6
XM_760993.1	TP01_0567	296.8	276.4	173.6	181.4	160	Hypothetical protein	Tp6
XM_761095.1	TP01_0667	289.8	310.3	163.7	127.3	354.7	Hypothetical protein	Tp6
XM_761254.1	TP01_0826	377.7	301.8	142.2	100.5	214.5	RRM domain-containing protein	Tp6
XM_761302.1	TP01_0874	369.9	236.8	308.9	256.6	138.3	Proteasome subunit beta (EC 3.4.25.1)	Tp6
XM_761336.1	TP01_0908	361.3	237	275	265	301.4	Proteasome subunit beta (EC 3.4.25.1)	Tp6
XM_761346.1	TP01_0918	455.7	219.1	218.3	280.3	286.3	WD_REPEATS_REGION domain-containing protein	Tp6
XM_761398.1	TP01_0970	326.6	385.2	305.5	231.9	290.8	Mitochondrial membrane protease subunit 2, putative	Tp6
XM_761465.1	TP01_1037	362.3	339.6	225.4	204.9	253.8	Hypothetical protein	Tp6
Tp7		3049.4	2191.9	996.5	2033.9	1067.4	Heat shock protein 90
XM_758041.1	TP03_0116	2543.9	2384.1	2206.4	1490	1201.7	Hypothetical protein	Tp7
XM_758592.1	TP04_0050	2209.2	2855.8	1752.3	1828.8	1630	40S ribosomal protein S15, putative	Tp7
XM_759843.1	TP02_0370	2560.1	3314.9	1977.9	1938.5	1471.1	60S acidic ribosomal protein P2, putative	Tp7
XM_761081.1	TP01_0653	4265	2701.1	2008.8	1596	1991.1	40S ribosomal protein S25	Tp7
XM_758618.1	TP04_0076	4951.8	607.7	727.2	907.3	1097.3	Hypothetical protein	Tp7
XM_761154.1	TP01_0726	2650.7	4874.9	3213.2	2176.4	1721.4	Elongation factor 1-alpha	Tp7
Tp8		1219.8	784.5	2340.1	3043.8	2739.9	Cysteine proteinase
Tp9		13.3	4850.7	1805.4	708	5.4	CD8+ T cell target antigen
XM_758119.1	TP03_0194	7	4689.7	5.8	13.5	10.1	Hypothetical protein	Tp9
XM_759489.1	TP02_0013	0.6	5585.7	42.6	11.6	0.5	Hypothetical protein	Tp9
XM_759685.1	TP02_0213	16.3	5317.4	831.7	357.1	31.8	Hypothetical protein	Tp9
XM_759687.1	TP02_0214	1	4649.9	317	34.4	1.7	Hypothetical protein	Tp9
XM_761502.1	TP01_1074	76.6	4753.7	1032.5	861	24.4	Hypothetical protein	Tp9
XM_761610.1	TP01_1182	273.3	6384.6	1497.7	1047.8	201.6	L-lactate dehydrogenase, putative	Tp9
Tp10		1021.1	348.1	463.8	300.3	289.6	Coronin
XM_757684.1	TP03_0653	863.2	171.4	374	338.2	233	Hypothetical protein	Tp10
XM_757867.1	TP03_0836	893.3	223.1	323.2	254.6	261	BCNT-C domain-containing protein	Tp10
XM_757868.1	TP03_0837	955.1	171.1	453.8	667.1	385.3	Cytochrome c oxidase assembly protein, putative	Tp10
XM_758226.1	TP03_0301	913.3	182.9	544.7	633.9	145.9	Hypothetical protein	Tp10
XM_758345.1	TP03_0418	838.3	450.5	608	456.3	247.7	U6 snRNA-associated Sm-like protein LSm8	Tp10
XM_759371.1	TP04_0827	723.7	342.3	383.3	328.4	278.1	Proteasome subunit alpha type (EC 3.4.25.1)	Tp10
XM_759542.1	TP02_0066	901.3	46.4	345.1	272.6	45.6	Hypothetical protein	Tp10
XM_759617.1	TP02_0141	761.7	371	364.3	410.1	267.3	Adenine nucleotide translocase, putative	Tp10
XM_759729.1	TP02_0256	956.9	221.6	539.2	587.6	238	Hypothetical protein	Tp10
p67		17464.5	840.2	21	2.9	2.2	Hypothetical protein
PIM		150.9	3491.9	3244.8	2660.9	905.3	Polymorphic immunodominant molecule
XM_758925.1	TP04_0383	1273.4	2621.5	3323.7	1868.7	712.7	Glyceraldehyde-3-phosphate dehydrogenase (EC 1.2.1.12)	PIM
gp34		24	261.2	113.1	100.9	113.4	Hypothetical protein
XM_757650.1	TP03_0619	107	342.4	148.5	125.4	74.5	Hypothetical protein	gp34
XM_757790.1	TP03_0759	40.6	325.3	103.3	74.1	75	Hypothetical protein	gp34
XM_757865.1	TP03_0834	93.5	285.2	144.6	141.5	131.8	Hypothetical protein	gp34
XM_757988.1	TP03_0062	111.2	279.3	130.6	112.9	134.5	DUF663 domain-containing protein	gp34
XM_758003.1	TP03_0077	91	367.5	119.7	141.6	112.8	Splicing factor 3A subunit 3, putative	gp34
XM_758011.1	TP03_0085	132.3	336.1	126.6	89	138.9	Hypothetical protein	gp34
XM_758065.1	TP03_0140	10.3	304.3	70.5	52.9	92.1	Cell division cycle 2 protein kinase, putative (EC 2.7.11.1)	gp34
XM_758137.1	TP03_0212	96.4	245.3	128.5	137.9	119.7	Splicing factor 3B subunit 1, putative	gp34
XM_758141.1	TP03_0216	53	274.9	111.9	84.5	101.3	RNA helicase, putative	gp34
XM_758179.1	TP03_0254	37.3	256.1	158.3	127	99.8	GPN-loop GTPase 3	gp34
XM_758186.1	TP03_0261	80.1	294	141.8	135.3	58.6	Autophagy-related protein 3	gp34
XM_758217.1	TP03_0292	100.6	271.2	118.4	179.9	91.6	Splicing factor Prp8, putative	gp34
XM_757704.1	TP03_0673	27.3	250.3	192.4	215.6	131.9	Hypothetical protein	gp34
XM_757842.1	TP03_0811	35.7	346.7	96.2	110.8	30.5	Hypothetical protein	gp34
XM_758221.1	TP03_0296	159.3	250.6	107.8	82.8	38	Protein kinase domain-containing protein	gp34
XM_758266.1	TP03_0341	44.8	357.5	122.1	89.7	120.6	MFS domain-containing protein	gp34
XM_757900.1	TP03_0868	0	301.2	124.1	76.4	3.5	Hypothetical protein	gp34
XM_758276.1	TP03_0349	110.5	230.6	109.3	83.8	121.3	Hypothetical protein	gp34
XM_758090.1	TP03_0165	18.9	366.3	123.3	131.3	2.9	ABC transporter, putative	gp34
XM_758104.1	TP03_0179	47.5	224.3	211.4	97.4	28.6	Hypothetical protein	gp34
XM_758318.1	TP03_0391	71	244.5	88.8	50.9	114.3	CID domain-containing protein	gp34
XM_758328.1	TP03_0401	86.1	370.3	88.4	75.3	186.1	Hypothetical protein	gp34
XM_758390.1	TP03_0898	11.1	336.2	214	272.3	139.7	Hypothetical protein	gp34
XM_758423.1	TP03_0489	80.3	304	147	179.9	169.5	Aspartyl-tRNA synthetase, putative (EC 6.1.1.12)	gp34
XM_758518.1	TP03_0583	76.8	281.4	197.5	94.8	117.1	Hypothetical protein	gp34
XM_758521.1	TP03_0586	49	321.2	101.3	45.9	48.6	Queuine tRNA-ribosyltransferase-like protein	gp34
XM_757928.1	TP03_0003	1	367.5	287.5	93.7	1	Hypothetical protein	gp34
XM_758531.1	TP03_0596	130.5	255.8	124.8	138.5	135.2	Hypothetical protein	gp34
XM_758533.1	TP03_0598	92.6	227.7	191.4	126	72.8	BOP1NT domain-containing protein	gp34
XM_758558.1	TP04_0016	0.6	280.2	129.7	102.9	0.8	Hypothetical protein	gp34
XM_758569.1	TP04_0027	88.4	407.9	134.6	95.1	49.4	ATP-dependant helicase, putative	gp34
XM_758591.1	TP04_0049	101	237.9	115.8	143.9	117.9	Ferredoxin	gp34
XM_758680.1	TP04_0138	155.2	300.3	175.6	113.3	99.7	Hypothetical protein	gp34
XM_758707.1	TP04_0165	56.4	250.7	173.2	200.7	114.2	XPGI domain-containing protein	gp34
XM_758708.1	TP04_0166	95.5	290	194.3	168.3	123.3	U5 small nuclear ribonucleoprotein, putative	gp34
XM_758724.1	TP04_0182	68.3	273.8	109.9	128.3	164.6	CPSF_A domain-containing protein	gp34
XM_758771.1	TP04_0229	120.9	272.7	241.9	123.9	138.7	Pescadillo homolog	gp34
XM_758827.1	TP04_0285	95.4	273.3	186.6	122.9	126	WD_REPEATS_REGION domain-containing protein	gp34
XM_759038.1	TP04_0496	92.2	305.1	133	83.2	165.3	Kri1_C domain-containing protein	gp34
XM_759044.1	TP04_0502	124.6	290.4	158.7	140.6	98.7	Hypothetical protein	gp34
XM_759082.1	TP04_0540	63.8	315.7	124.6	122.4	160.9	Hypothetical protein	gp34
XM_759083.1	TP04_0541	95.3	285.1	187.3	145.5	78.1	Hypothetical protein	gp34
XM_759092.1	TP04_0550	94	314.9	212.5	175	183.2	Hypothetical protein	gp34
XM_759107.1	TP04_0565	66.8	239.8	102.5	48.2	98.6	SPOC domain-containing protein	gp34
XM_759152.1	TP04_0610	69.3	304.4	156.6	115.9	219.6	NifU domain-containing protein	gp34
XM_759153.1	TP04_0611	119.4	334.4	110.9	104.5	193.9	Hypothetical protein	gp34
XM_759179.1	TP04_0637	66.3	244.6	114.1	101.5	54.5	Hypothetical protein	gp34
XM_759242.1	TP04_0699	60.9	353.5	138.9	146.4	110.7	Tudor domain-containing protein	gp34
XM_759318.1	TP04_0775	42.1	350.4	123.3	76.4	96.9	Hypothetical protein	gp34
XM_759363.1	TP04_0819	6.5	264.6	251.9	194.6	5.8	Hypothetical protein	gp34
XM_759364.1	TP04_0820	5.3	203.9	215.4	126.3	2.6	Hypothetical protein	gp34
XM_759451.1	TP04_0907	3.2	336.3	102.1	90.7	6.4	Hypothetical protein	gp34
XM_759471.1	TP04_0002	0	281.2	362.7	103.8	1.5	Hypothetical protein	gp34
XM_759564.1	TP02_0088	64.9	286.7	109.6	99.8	95.3	Arginine N-methyltransferase, putative	gp34
XM_759572.1	TP02_0096	98.4	248.1	174.6	137.4	105.1	Chaperone protein dnaJ, putative	gp34
XM_759654.1	TP02_0183	61.7	287.7	150.7	111.7	97	Hypothetical protein	gp34
XM_759759.1	TP02_0286	51.8	347.4	160.5	126.7	149.5	ATP-dependent RNA Helicase, putative	gp34
XM_759834.1	TP02_0361	98.3	249.4	157.4	177.4	89.5	ATP-dependent protease, putative	gp34
XM_759914.1	TP02_0441	37.7	343.5	148.3	83.8	87.1	Brix domain-containing protein	gp34
XM_759933.1	TP02_0460	78.2	250.3	135.8	111.6	105.6	ABC transporter, putative	gp34
XM_759987.1	TP02_0514	76.9	327.9	71.8	72.8	32.8	J domain-containing protein	gp34
XM_760008.1	TP02_0535	16.7	376.7	223.8	206.1	7.1	Hypothetical protein	gp34
XM_760053.1	TP02_0580	126.3	221.4	124.7	124.2	54.4	Peptidyl-prolyl cis-trans isomerase, putative	gp34
XM_760121.1	TP02_0648	43.9	249.5	196.4	145.9	172.5	J domain-containing protein	gp34
XM_760163.1	TP02_0690	66.1	313.6	146.6	167.2	151.6	UMP-CMP kinase, putative	gp34
XM_760182.1	TP02_0708	56.6	301.2	137.1	89.2	73.2	Nucleolar GTP-binding protein 2	gp34
XM_760189.1	TP02_0715	142.1	295.6	167.8	88.8	150.8	PH domain-containing protein	gp34
XM_760212.1	TP02_0738	44.1	230.1	168	158.7	65.2	Hypothetical protein	gp34
XM_760238.1	TP02_0764	134.8	288.5	168.5	106.6	87.8	Hypothetical protein	gp34
XM_760362.1	TP02_0887	38.6	295.9	244.6	95.3	102	THUMP domain-containing protein	gp34
XM_760562.1	TP01_0128	126.8	284.3	88.9	61.6	93.1	Hypothetical protein	gp34
XM_760573.1	TP01_0139	99.1	253.4	181.1	192.1	99.9	Hypothetical protein	gp34
XM_760602.1	TP01_0168	63.9	269.2	134.3	105.1	102.1	Hypothetical protein	gp34
XM_760677.1	TP01_0243	61.1	336.5	76.4	93	30.2	CPSF_A domain-containing protein	gp34
XM_760743.1	TP01_0309	134.5	250.3	110.8	83.6	120.3	Hypothetical protein	gp34
XM_760775.1	TP01_0341	21.7	317.7	189.1	167.9	79.2	Palmitoyltransferase (EC 2.3.1.225)	gp34
XM_760812.1	TP01_0378	25.1	363.3	118.6	184.4	6.5	Hypothetical protein	gp34
XM_760936.1	TP01_0509	103.5	339.1	134.1	163.4	99.1	Hypothetical protein	gp34
XM_760952.1	TP01_0525	56.9	300.5	100	87.5	122.6	Hypothetical protein	gp34
XM_761024.1	TP01_0596	88.9	295.5	118.1	108.8	80.3	Hypothetical protein	gp34
XM_761029.1	TP01_0601	12.6	351.7	236.2	119.8	53.3	ThiF domain-containing protein	gp34
XM_761080.1	TP01_0652	88.8	388.3	79.4	97.2	114.1	RNA polymerase subunit, putative	gp34
XM_761140.1	TP01_0712	165.5	293.1	167.8	144.6	51.2	Clathrin medium chain, putative	gp34
XM_761242.1	TP01_0814	98.5	339.5	156.9	160.9	2.1	Hypothetical protein	gp34
XM_761243.1	TP01_0815	47.4	250.8	110.1	68.4	109.5	Cyclophilin, putative	gp34
XM_761441.1	TP01_1013	146.2	310.4	96.2	88.4	164.7	MtN3/RAG1IP protein, putative	gp34
XM_761564.1	TP01_1136	40.6	226.7	124.2	129.3	100.3	Hypothetical protein	gp34
XM_761591.1	TP01_1163	60.8	308.2	260.3	232.8	34.6	MFS domain-containing protein	gp34
XM_761599.1	TP01_1171	34.8	312.2	203.3	198.1	147.3	Hypothetical protein	gp34
XM_761602.1	TP01_1174	120.6	244	120.5	116.1	95.8	POP4 domain-containing protein	gp34
p104		15.8	11151.2	539.3	394.6	39.2	104 kDa microneme/ rhoptry antigen
XM_758118.1	TP03_0193	45	8806.6	10.3	9.3	16.3	Hypothetical protein	p104
XM_759182.1	TP04_0640	136.1	8957.2	671.3	794.4	201.9	Hypothetical protein	p104
XM_760968.1	TP01_0541	0	9630.6	5	0.1	4.1	Hypothetical protein	p104
PCNA 1		1225.7	102.7	271.9	336.8	102	Proliferating cell nuclear antigen
XM_757809.1	TP03_0778	1102.3	49.3	28.8	36	88.2	4-methyl-5(B-hydroxyethyl)-thiazole monophosphate biosynthesis protein, putative	PCNA 1
XM_758025.1	TP03_0100	1015.4	106.2	153.9	219.6	172.2	Hypothetical protein	PCNA 1
XM_758031.1	TP03_0106	1126.8	149.4	151	135.1	331.5	Hypothetical protein	PCNA 1
XM_758100.1	TP03_0175	1062.6	41.6	20.5	89.7	146.9	Hypothetical protein	PCNA 1
XM_758115.1	TP03_0190	828.8	52.9	118.1	105.6	363.9	Hypothetical protein	PCNA 1
XM_758190.1	TP03_0265	1157.8	115.1	130.9	167.6	530.8	MI domain-containing protein	PCNA 1
XM_758282.1	TP03_0355	893.1	234.1	248.1	7.6	51.4	Hypothetical protein	PCNA 1
XM_758789.1	TP04_0247	1239.9	129.8	0.2	0.3	5.2	Hypothetical protein	PCNA 1
XM_759447.1	TP04_0903	856.1	62.5	26.9	143.8	7	Hypothetical protein	PCNA 1
XM_759541.1	TP02_0065	1108.5	58	52	8.4	40.2	Hypothetical protein	PCNA 1
XM_759604.1	TP02_0128	1029.3	56.1	75.2	88.4	151.3	Hypothetical protein	PCNA 1
XM_760091.1	TP02_0618	1061.3	98.2	0.1	0.5	0.9	Hypothetical protein	PCNA 1
XM_760263.1	TP02_0789	1045.5	47	1.7	4	3.5	Hypothetical protein	PCNA 1
XM_760266.1	TP02_0792	1387.8	77	30.5	44.4	270.1	Guanosine monophosphate reductase, putative	PCNA 1
XM_760797.1	TP01_0363	811.5	99.5	127.5	100.2	185.2	Hypothetical protein	PCNA 1
XM_760799.1	TP01_0365	961.1	51.2	14.2	50.9	78.7	Hypothetical protein	PCNA 1
PCNA 2		710.7	49.1	420.4	314.2	181.3	Proliferating cell nuclear antigen
XM_760151.1	TP02_0678	939.1	363	246.4	237.4	491.4	Eukaryotic translation initiation factor 2 beta subunit, putative	PCNA 2
XM_760200.1	TP02_0726	920.7	34.7	254.9	295.4	154.1	Hypothetical protein	PCNA 2
XM_760446.1	TP01_0012	900.2	177.3	519.6	371.4	124.6	Protein kinase C interacting protein 1, putative	PCNA 2
XM_760738.1	TP01_0304	1040.8	247.3	424.7	283.7	180.3	Hypothetical protein	PCNA 2
XM_760935.1	TP01_0508	798	215.8	212.3	237.5	133.4	Ubiquitin-protein ligase, putative	PCNA 2
XM_760951.1	TP01_0524	857.5	88.7	191.3	409.6	112.9	Hypothetical protein	PCNA 2
XM_761211.1	TP01_0783	958.9	396.8	335.9	398	419.3	Hypothetical protein	PCNA 2
XM_761234.1	TP01_0806	740.6	199.8	444	326.3	515	U6 snRNA-associated Sm-like protein LSm5	PCNA 2
XM_761624.1	TP01_1196	907.8	78.7	384.5	356.1	186.9	Ribonucleotide-diphosphate reductase small subunit, putative	PCNA 2
