# Supplementary material for: Comparative Transcriptomics of the Bovine Apicomplexan Parasite Theileria parva Developmental Stages Reveals Massive Gene Expression Variation and Potential Vaccine Antigens
Source: Front Vet Sci. 2020 Jun 9;7:287. doi: 10.3389/fvets.2020.00287 (PMC7296165; doi:10.3389/fvets.2020.00287)
Supplement: Supplementary Data File 5 — Candidate vaccine proteins predicted to be localized in the parasite plasma membrane. [file Data_Sheet_5.xlsx]

## Sheet: Antibody epitopes prediction
Antibody epitopes prediction
Gene ID	Protein Acc. Number	sporoblast	sporozoite	schizonta	schizontb	piroplasm	Product Name	clusters.clustering	Domain	Sub_cellular Localization	Number of antibidy predicted epitopes	Highest predicted residue scores
TP03_0513	XP_763541.1	150.2	800	334.7	296.1	199.2	Hypothetical protein	Tp1	5 TMD	Plasma membrane	7	0.749
TP02_0794	XP_765361.1	305.8	338.1	199.7	212.7	148.9	VHS domain-containing protein	Tp6	1 TMD	Nucleus	9	0.742
TP02_0806	XP_765373.1	294.1	45.4	100.6	114	171.1	Hypothetical protein	Tp3	4 TMD	Plasma membrane	2	0.741
TP02_0615	XP_765181.1	345	173.9	13.6	8.8	31.1	RING-type domain-containing protein	Tp3	7 TMD	Plasma membrane	20	0.738
TP02_0577	XP_765143.1	181.2	455.3	237.5	279.9	220.3	Probable ATP-dependent 6-phosphofructokinase (ATP-PFK) (Phosphofructokinase) (EC 2.7.1.11) (Phosphohexokinase)	Tp4	2 TMD, NLS	Cytoplasm	47	0.728
TP03_0304	XP_763322.1	256.4	47.1	83.9	66.1	35.1	Hypothetical protein	Tp3	3 TMD	Plasma membrane	11	0.725
TP04_0241	XP_763876.1	201	1528.4	178.5	156.8	371.5	MI domain-containing protein	Tp2	4 TMD	Nucleus	8	0.723
TP02_0791	XP_765358.1	227.8	1427.1	287.3	217.1	109.1	Hypothetical protein	Tp2	3 TMD	Peroxisome	8	0.722
TP03_0544	XP_763572.1	32	1567.5	360.1	202.8	97.7	Hypothetical protein	Tp2	10 TMD	Plasma membrane	6	0.717
TP01_1200	XP_766721.1	295.2	22.2	96.6	48.7	12.8	Phosphodiesterase (EC 3.1.4.-)	Tp3	7 TMD	Plasma membrane	11	0.711
TP02_0232	XP_764798.1	502.8	1387.2	265.7	274	18.8	Hypothetical protein	Tp2	11 TMD	Plasma membrane	10	0.709
TP01_0509	XP_766029.1	103.5	339.1	134.1	163.4	99.1	Hypothetical protein	gp34	SP, 1 TMD	Extracellular space	13	0.709
TP02_0654	XP_765220.1	512.8	457.4	372.6	425.9	144.4	Hypothetical protein	Tp5	2 TMD	Plasma membrane	8	0.708
TP02_0738	XP_765305.1	44.1	230.1	168	158.7	65.2	Hypothetical protein	gp34	1 TMD	cytoplasm	25	0.704
TP03_0168	XP_763186.1	90.7	436.8	638.7	358.4	107.8	Hypothetical protein	Tp4	SP, 1TMD	Plasma membrane	88	0.703
TP03_0165	XP_763183.1	18.9	366.3	123.3	131.3	2.9	ABC transporter, putative	gp34	9 TMD	Nucleus	34	0.702
TP04_0895	XP_764532.1	487.1	573.2	361.4	252.7	330.1	RING-type domain-containing protein	Tp5	1 TMD	Peroxisome	8	0.701
TP01_1013	XP_766534.1	146.2	310.4	96.2	88.4	164.7	MtN3/RAG1IP protein, putative	gp34	SP, 7 TMD	plasma membrane	9	0.7
TP04_0448	XP_764083.1	275.6	21.5	27.9	24.9	75.9	Hypothetical protein	Tp3	8 TMD	Plasma membrane	21	0.699
TP04_0081	XP_763716.1	277.4	22.5	98.6	124.5	40.9	Hypothetical protein	Tp3	7 TMD	Plasma membrane	18	0.694
TP02_0792	XP_765359.1	1387.8	77	30.5	44.4	270.1	Guanosine monophosphate reductase, putative	PCNA 1	2 TMD	Plasma membrane	1	0.694
TP02_0562	XP_765128.1	252.1	27.9	42.8	68.2	122.9	RHOMBOID-like protein (EC 3.4.21.-) (Rhomboid-like protein)	Tp3	6 TMD	Nucleus	13	0.693
TP04_0817	XP_764454.1	267.9	522.2	301	290.8	188.5	Hypothetical protein	Tp4	1 TMD	mitochondion	6	0.693
TP01_0601	XP_766122.1	12.6	351.7	236.2	119.8	53.3	ThiF domain-containing protein	gp34	2 TMD	mitochondion	6	0.693
TP02_0887	XP_765455.1	38.6	295.9	244.6	95.3	102	THUMP domain-containing protein	gp34	1 TMD	nucleus	7	0.691
TP01_0526	XP_766046.1	484.7	443.8	142.1	122.7	111.6	t-SNARE coiled-coil homology domain-containing protein	Tp6	1 TMD	Cytoplasm	6	0.69
TP01_0025	XP_765552.1	302.2	239.1	297.1	209.6	202.1	CS domain-containing protein	Tp6	1 TMD	Endoplasmic retuculum	11	0.685
TP03_0349	XP_763369.1	110.5	230.6	109.3	83.8	121.3	Hypothetical protein	gp34	1 TMD	peroxisome	14	0.685
TP03_0184	XP_763202.1	256.1	32	77.9	71.1	55.8	Hypothetical protein	Tp3	2 TMD	Plasma membrane	15	0.682
TP02_0726	XP_765293.1	920.7	34.7	254.9	295.4	154.1	Hypothetical protein	PCNA 2	3 TMD	Plasma membrane	6	0.681
TP02_0446	XP_765012.1	367.8	25.9	83.1	52.6	232.4	Palmitoyltransferase (EC 2.3.1.225)	Tp3	4 TMD	Plasma membrane	11	0.68
TP01_0506	XP_766026.1	145.2	556.3	241.8	194.8	162.4	GOLD domain-containing protein	Tp4	SP, 1TMD	Extracellular space	7	0.679
TP04_0076	XP_763711.1	4951.8	607.7	727.2	907.3	1097.3	Hypothetical protein	Tp7	2 TMD	Plasma membrane	2	0.677
TP04_0138	XP_763773.1	155.2	300.3	175.6	113.3	99.7	Hypothetical protein	gp34	2 TMD	Cytoplasm	13	0.674
TP02_0183	XP_764747.1	61.7	287.7	150.7	111.7	97	Hypothetical protein	gp34	9 TMD	plasma membrane	21	0.674
TP01_0091	XP_765618.1	97.8	479.2	349.1	242.4	180.5	Hypothetical protein	Tp4	1 TMD	Peroxisome	12	0.668
TP01_1195	XP_766716.1	527	524.3	455.3	455.6	265.1	Cop-coated vesicle membrane protein p24, putative	Tp5	2 TMD	Plasma membrane	2	0.667
TP02_0908	XP_765476.1	272.7	36.6	49.7	50.7	187.3	Hypothetical protein	Tp3	4 TMD	Golgi apparatus	8	0.664
TP03_0125	XP_763143.1	66	836.4	298.5	402	180.4	Hypothetical protein	Tp1	4 TMD	Plasma membrane	1	0.663
TP01_1163	XP_766684.1	60.8	308.2	260.3	232.8	34.6	MFS domain-containing protein	gp34	6 TMD	peroxisome	13	0.662
TP04_0803	XP_764440.1	97.8	369.5	318.2	236.2	204.8	TPT domain-containing protein	Tp4	8 TMD	Peroxisome	11	0.659
p67	XP_763305.1	17464.5	840.2	21	2.9	2.2	Hypothetical protein		SP, 1 TMD	Plasma membrane - Extracellular space	18	0.658
TP03_0175	XP_763193.1	1062.6	41.6	20.5	89.7	146.9	Hypothetical protein	PCNA 1	SP, TMD	Extracellular space	18	0.658
TP03_0834	XP_762958.1	93.5	285.2	144.6	141.5	131.8	Hypothetical protein	gp34	3 TMD	Plasma membrane	29	0.657
TP03_0804	XP_762928.1	402.1	282.4	180.2	133.1	53.5	Signal peptidase I (EC 3.4.21.89)	Tp6	1 TMD	Endoplasmic retuculum	6	0.654
TP04_0907	XP_764544.1	3.2	336.3	102.1	90.7	6.4	Hypothetical protein	gp34	18 TMD	Peroxisome	23	0.652
TP01_0365	XP_765892.1	961.1	51.2	14.2	50.9	78.7	Hypothetical protein	PCNA 1	1 TMD	Plasma membrane	6	0.651
TP03_0895	XP_763368.1	60.5	307.5	432.2	255.6	121.4	Folate/biopterin transporter, putative	Tp4	12 TMD	Plasma membrane	17	0.65
TP02_0668	XP_765234.1	307.1	246.6	291.2	249.9	215.1	PlsC domain-containing protein	Tp6	1 TMD	Plasma membrane	8	0.65
PIM	XP_763686.1	150.9	3491.9	3244.8	2660.9	905.3	polymorphic immunodominant molecule		SP, 3 TMD	plasma membrane	7	0.65
TP02_0256	XP_764822.1	956.9	221.6	539.2	587.6	238	Hypothetical protein	Tp10	1 TMD	Extracellular space	4	0.647
TP03_0455	XP_763475.1	238.3	16.6	61.3	63.9	119.1	Hypothetical protein	Tp3	SP, 6TMD	Plasma membrane	10	0.645
TP03_0610	XP_763638.1	393.4	257.5	267.4	245.7	129.8	Hypothetical protein	Tp6	1 TMD	golgi apparatus	8	0.645
TP01_1136	XP_766657.1	40.6	226.7	124.2	129.3	100.3	Hypothetical protein	gp34	8 TMD	Plasma membrane	6	0.64
TP02_0142	XP_764711.1	111.1	859.9	262.4	132.6	239.1	Ubiquitin-like domain-containing protein	Tp1	1 TMD	Extracellular space	5	0.639
TP02_0482	XP_765048.1	267.3	434.7	183.5	165.3	253.6	Hypothetical protein	Tp6	1 TMD	Nucleus	4	0.639
TP02_0066	XP_764635.1	901.3	46.4	345.1	272.6	45.6	Hypothetical protein	Tp10	2 TMD	peroxisome	5	0.637
TP03_0689	XP_762813.1	378.4	24.6	68.4	34.5	143.7	Hypothetical protein	Tp3	6 TMD	Plasma membrane	10	0.635
TP04_0794	XP_764431.1	244.9	80.6	47.2	66.3	49.4	Hypothetical protein	Tp3	1 TMD	Nucleus	3	0.635
TP02_0128	XP_764697.1	1029.3	56.1	75.2	88.4	151.3	Hypothetical protein	PCNA 1	4 TMD	peroxisome	9	0.635
TP04_0053	XP_763688.1	266	24.4	94	33.9	62.3	Hypothetical protein	Tp3	3 TMD	Plasma membrane	5	0.634
TP02_0460	XP_765026.1	78.2	250.3	135.8	111.6	105.6	ABC transporter, putative	gp34	5 TMD	Plasma membrane	13	0.634
TP01_0081	XP_765608.1	287.1	11.1	14.7	35.9	170.2	Hypothetical protein	Tp3	1 TMD	Plasma membrane	5	0.632
TP03_0852	XP_762976.1	746.6	469.6	328.8	328.5	492.8	Protein transport protein Sec61, putative	Tp5	8 TMD	plasma membrane	13	0.632
TP02_0942	XP_765510.1	31	848.8	323.2	419.2	76.6	Hypothetical protein	Tp1	3 TMD	Plasma membrane	7	0.631
TP03_0341	XP_763359.1	44.8	357.5	122.1	89.7	120.6	MFS domain-containing protein	gp34	TMD	Plasma membrane	13	0.629
TP01_0341	XP_765868.1	21.7	317.7	189.1	167.9	79.2	Palmitoyltransferase (EC 2.3.1.225)	gp34	4 TMD	plasma membrane	11	0.627
TP04_0317	XP_763952.1	752.4	358.1	269.9	312	223.6	V-type proton ATPase proteolipid subunit	Tp5	3 TMD	Vacuolar, cytoplasm	2	0.623
TP03_0167	XP_763185.1	56.7	1701.9	177.1	225.9	605.3	Hypothetical protein	Tp2	3 TMD	Plasma membrane	5	0.621
TP03_0568	XP_763596.1	323.1	329.3	263.7	237.4	156.5	Hypothetical protein	Tp6	1 TMD	Peroxisome	3	0.618
TP02_0141	XP_764710.1	761.7	371	364.3	410.1	267.3	Adenine nucleotide translocase, putative	Tp10	4 TMD	cytoplasm	14	0.616
TP01_1171	XP_766692.1	34.8	312.2	203.3	198.1	147.3	Hypothetical protein	gp34	7 TMD	endoplasmic retuculum	13	0.615
TP04_0056	XP_763691.1	159.5	1491.4	282.4	265.2	332.6	Hypothetical protein	Tp2	1 TMD	Plasma membrane	3	0.613
TP01_1020	XP_766541.1	268.2	28.1	33.7	50.9	75.8	Hypothetical protein	Tp3	3TMD	Plasma membrane	8	0.613
TP02_0393	XP_764959.1	335.7	365.7	164.9	223.8	228.1	Translocation protein sec62, putative	Tp6	2 TMD	Endoplasmic retuculum	15	0.613
TP02_0417	XP_764983.1	548.1	272.1	325.4	306.2	283.4	Hypothetical protein	Tp5	4 TMD	Plasma membrane	6	0.609
gp34	XP_766460.1	24	261.2	113.1	100.9	113.4	Hypothetical protein		SP, 1 TMD	Extracellular space	12	0.609
TP04_0533	XP_764168.1	362.8	20.5	106.8	121.2	94.9	Hypothetical protein	Tp3	1 TMD	Nucleus	9	0.603
TP03_0179	XP_763197.1	47.5	224.3	211.4	97.4	28.6	Hypothetical protein	gp34	1 TMD	golgi apparatus	18	0.601
TP01_0524	XP_766044.1	857.5	88.7	191.3	409.6	112.9	Hypothetical protein	PCNA 2	1 TMD	Extracellular space	2	0.601
TP03_0868	XP_762993.1	0	301.2	124.1	76.4	3.5	Hypothetical protein	gp34	1 TMD	endoplasmic retuculum	12	0.599
TP01_0793	XP_766314.1	150.9	1620.3	693.4	489	422.7	Hypothetical protein	Tp2	1 TMD	Mitochondion	3	0.591
TP01_1219	XP_766740.1	448.9	388.9	256.5	425.9	349.4	Phosphatidylserine decarboxylase, putative	Tp5	1 TMD	Plasma membrane	8	0.582
TP01_0253	XP_765780.1	453	282.4	215.5	190.4	331.7	Hypothetical protein	Tp6	2 TMD	Plasma membrane	5	0.58
TP01_0761	XP_766282.1	337.5	15.7	39.3	45.2	141.4	Hypothetical protein	Tp3	3 TMD	cytoplasm	13	0.576
TP04_0640	XP_764275.1	136.1	8957.2	671.3	794.4	201.9	Hypothetical protein	p104	1 TMD	Plasma membrane	2	0.566
TP02_0265	XP_764831.1	357	292.7	313.6	228	201.6	Hypothetical protein	Tp6	1 TMD	Mitochondion	7	0.557
