# Supplementary material for: Comparative Transcriptomics of the Bovine Apicomplexan Parasite Theileria parva Developmental Stages Reveals Massive Gene Expression Variation and Potential Vaccine Antigens
Source: Front Vet Sci. 2020 Jun 9;7:287. doi: 10.3389/fvets.2020.00287 (PMC7296165; doi:10.3389/fvets.2020.00287)
Supplement: Supplementary Data File 6 — ELISA OD reading of each epitope sera and the positive and negative control sera. [file Data_Sheet_6.xlsx]

## Sheet: ELISA OD data
Sera	Predetermined OD positive control			Mean antisera	Average Negative OD/TP04_0076F	Average TP04_0076F			Mean Antisera	Average Negative OD/TP04_0076ep2	Average TP04_0076ep2			Mean Antisera	Average Negative OD/ TP04_0640ep1	Average OD TP04_0640ep1			Mean Antisera	Average Negative OD/TP04_0640ep2	Average TP04_0640ep2
1	1.353			0.7155	0.059	0.2745			1.031	0.047	0.9005			1.02	0.039	0.244			1.0755	0.0585	0.274
2	1.251				0.0705	0.301				0.0495	0.1405				0.051	0.1735				0.047	0.58
3	1.216				0.0685	0.151				0.0685	0.732				0.025	0.2685				0.03	0.289
4	1.036					0.423					1.0845					0.2185					0.34
5	1.079					0.479					0.8725					0.2265					0.337
6	1.061					0.175					0.577					0.2565					0.314
7	1.142					0.2815					1.0255					0.45					0.548
8	1.142					0.4045					0.301					0.4625					0.511
9	1.002					0.2125					1.277					0.1335					0.506
10	1.063					0.338					0.2685					0.2265					0.356
11	1.203					0.8585					1.3075					0.304					0.7105
12	1.064					0.208					0.301					0.572					0.755
13	1.13					0.2555					0.223					0.118					0.4535
14	1.3					0.2245					0.7965					0.207					0.9455
15	1.315					0.3095					0.103					0.232					0.6585
16	1.127					0.5355					0.1465					0.253					0.2405
17	1.147					0.517					0.9505					0.259					0.447
18	0.958					0.245					0.694					0.26					0.3575
19	1.124					0.2705					0.361					0.263					0.4585
20	1.002					0.506					0.3025					0.233					0.7635
21	0.919					0.3675
22	0.895					0.461
23	0.898					0.1605
24	0.942					0.3235
25	0.994					0.1475
26	0.958					0.178
27	1.034					0.2485
28	0.958					0.286
29	0.958					0.4875
30	0.886					0.255
31	0.958					1.005
32	0.925					0.1435
33	0.987					0.4905
34	0.925					0.1815
Negative control 1	0.013
Negative control 2	0.046
Negative control 3	0.038
